# Supplementary material
Source: Research Square preprint supplement (doi:10.21203/rs.3.rs-9692259/v1)
Supplement: Supplementary file 1 [file 0ad68d9830f9591f04285112.xlsx]

## Sheet: LA-TAM_Pathway 
Spatial Region	category	term.description	fdr	Enrichment_Score	Overlap	hits	Sample
LA-TAM neighborhood	GOBP	Lipoprotein Biosynthesis	0.00065	3.18709	3	PIGN , PIGS , ZDHHC7	UKF1
LA-TAM neighborhood	GOBP	Glucose Import	0.0083	2.08092	1	ZDHHC7	UKF1
LA-TAM neighborhood	GOBP	LDLR Activity	0.0083	2.08092	1	HNRNPK	UKF1
LA-TAM neighborhood	GOBP	SMAD complex assembly	0.00284	2.54668	3	TGFB1,SMAD2,SMAD4	UKF1
LA-TAM neighborhood	Reactome	SMADs activation via TGFb	0.0029	2.5376	4	TGFB1,SMAD2,SMAD4,TGFBR1	UKF1
LA-TAM neighborhood	Reactome	ECM organization	7.93e-07	6.10073	29	TGFB1,LAMA5,ADAM19,THBS1,ITGAV,COL8A1,COL5A3,ICAM1,TNC,APP,MMP16,ITGA5,MMP3,SDC2,MMP1,A2M,CTSL,CTSB,COL18A1,CD47,COL5A1,MMP9,SDC4,COL4A1,LOXL2,DDR1,DAG1,ITGB3,CAPNS1	UKF2
LA-TAM neighborhood	Reactome	TGFb Receptor Signaling	0.000138	3.86012	9	TGFB1,ITGAV,JUNB,TGFBR2,STAT1,PPP1CB,TGFBR1,ITGB3,UBB	UKF2
LA-TAM neighborhood	Reactome	Interleukin-10 signaling	1.6e-05	4.79588	8	TNFRSF1A,CSF3,CCL2,IL1B,STAT3,ICAM1,CXCL8,IL6	UKF2
LA-TAM neighborhood	Reactome	Cholesterol biosynthesis	7.8e-05	4.10791	7	CYP51A1,MVK,MSMO1,SQLE,DHCR7,IDI1,EBP	UKF2
LA-TAM neighborhood	Reactome	Hypoxia response	0.00013	3.88606	10	PSMA3,PSMD1,PSMB9,PSMB8,PSME1,PSMD6,HIF1A,PSMD9,CITED2,UBB	UKF2
LA-TAM neighborhood	GOBP	Wound healing	0.00014	3.85387	26	PLAT,TGFB1,TFPI2,NOTCH2,UBASH3B,ITGA5,DCBLD2,PLAUR,PLSCR1,ANXA6,TGFBR2,COL5A1,SDC4,ENG,B4GALT1,CD9,IL24,PROS1,VKORC1,IL6,DDR1,HIF1A,DAG1,TGFBR1,ITGB3,MYL12A	UKF2
LA-TAM neighborhood	GOBP	Vasculature development	4.14e-12	11.383	52	TGFB1,CCL2,AHR,SOX4,NOTCH2,THBS1,ITGAV,COL8A1,LEF1,SEMA3C,NRP1,MYO1E,ITGA5,ANGPTL4,JUNB,CXCL8,EDNRA,SOCS3,EMC10,ANP32B,ANXA2,WARS1,TGFBR2,COL18A1,MYLK,EFNA1,JUN,COL5A1,PTEN,ENG,CLIC4,COL4A1,ZFAND5,ERRFI1,SHB,SAT1,B4GALT1,SGCB,LOXL2,CITED1,TGFBI,ANGPT1,HIF1A,DAG1,CITED2,TGFBR1,ITGB3,TEAD2,APLNR,CIB1,VEGFC,NRXN3	UKF2
LA-TAM neighborhood	GOBP	Cell migration	3.27e-11	10.4855	68	TGFB1,CCL2,LAMA5,RRAS2,THBS1,ITGAV,RAB11A,IL1B,STAT3,ICAM1,ARSB,PPP2R3A,TNC,LEF1,SEMA3C,SEMA3A,NRP1,ABHD2,DLC1,APP,TIAM1,STC1,CYGB,ITGA5,PRKCE,CXCL8,ZNF609,CALR,IFITM1,EMC10,TJP1,ATP2B4,TGFBR2,MYLK,CD47,EFNA1,SLK,LMO4,JUN,PTEN,MMP9,SDC4,ENG,CLIC4,TMSB4X,GPNMB,CD9,IL24,PLXNA1,NFE2L2,IL6,AKIRIN1,SEMA4B,SPATA13,HYAL2,SELENOK,ANGPT1,FAM89B,HIF1A,DAG1,CITED2,SOD2,TGFBR1,ITGB3,SEMA6B,CIB1,VEGFC,PLP1	UKF2
LA-TAM neighborhood	GOBP	TGFb signaling pathway	0.000118	3.92812	10	TGFB1,STAT3,PML,FOS,TGFBR2,JUN,ENG,CITED1,CITED2,TGFBR1	UKF2
LA-TAM neighborhood	GOBP	Myeloid differentiation	1.4e-07	6.85387	22	TGFB1,DNASE2,INHBA,CCN4,TYROBP,IL11,CSF1R,RUNX1,FAM20C,ZNF385A,DHRS2,SH2B3,MMP9,TREM2,GATA3,MT1G,LRRK1,GAB3,NBEAL2,CEBPA,OSCAR,GPR68	UKF3
LA-TAM neighborhood	GOBP	Response to hypoxia	1.23e-05	4.91009	18	HMOX1,TGFB1,EGLN3,THBS1,CYBA,KCNMB1,KCNMA1,STC1,ANGPT2,EDNRA,SMAD4,PLK3,TREM2,CYBB,LOXL2,CXCR4,LTA,PGF	UKF3
LA-TAM neighborhood	GOBP	TGFB1 production	0.000189	3.72354	4	THBS1,TYROBP,LUM,FOXP3	UKF3
LA-TAM neighborhood	GOBP	Response to lipid	0.0095	2.02228	38	PCK2,TGFB1,CYP27B1,IGFBP2,INHBA,PYCARD,CD68,THBS1,CYBA,PDGFRB,SMAD2,IL1B,WNT5A,ABHD2,KCNMB1,STC1,PTGIR,GFI1,WNT10B,AXIN2,PTGER4,FIBIN,FMO1,S100A9,TREM2,SYK,FOXP3,CYBB,SPP1,CSF2RB,CD14,TBXAS1,LTA,DIO2,HAMP,IRF3,BTK,SPON2	UKF3

## Sheet: IFN-TAM_Pathway
Spatial Region	category	term description	Overlap	fdr	Enrichment_Score	hits	Sample
IFN-TAM neighborhood	GO Process	Type I IFN production	10	3.42e-05	4.46597	RIPK2,RELB,HSP90AA1,RIOK3,NMB,IRF7,CYLD,ISG15,IFIH1,ITCH	UKF4
IFN-TAM neighborhood	GO Process	α/β T cell activation	8	2.88e-06	5.54061	BCL3,RIPK2,RELB,IL2RG,RSAD2,BCL6,CBLB,ITCH	UKF4
IFN-TAM neighborhood	GO Process	Leukocyte activation	34	1.4e-07	6.85387	BCL3,RIPK2,RELB,DNAJB9,NOTCH2,RABL3,PKNOX1,NFIL3,TSC1,CXCL8,ADAM17,PSEN1,P2RX7,CD86,FYN,C5AR1,SLAMF7,SLAMF9,IL2RG,UBD,MT1G,RABGEF1,IL33,RSAD2,BCL2,BCL6,AZI2,LYN,CEBPG,FPR2,MR1,KITLG,CBLB,ITCH	UKF4
IFN-TAM neighborhood	REACTOME	IFN-α/β signaling	91	1.33e-15	14.8761	RSAD2, RIPK2, ISG20, RELB, RIOK3, HSP90AA1, NMB, ISG15, IRF7, CYLD, IFIT3, HLA-C, MX1, GBP2, IFITM1, ITCH, IFIH1	UKF4
IFN-TAM neighborhood	REACTOME	Induction of IFN-α/β	84	1.33e-14	13.8761	RSAD2, RIPK2, ISG20, RELB, RIOK3, HSP90AA1, NMB, ISG15, IRF7, CYLD, IFIT3, HLA-C, MX1, GBP2, IFITM1, ITCH, IFIH1	UKF4
IFN-TAM neighborhood	GO Process	Oxidative phosphorylation	87	6e-06	9	NDUFB7,NDUFS7,ATP5F1E,ATP5F1B,NDUFA1,NDUFA8,SDHB,NDUFA13,COX7C	UKF5
IFN-TAM neighborhood	GO Process	Myeloid differentiation	135	3.1504e-07	9	OSTM1,SPI1,TYROBP,CD81,TCIRG1,FAM20C,LBR,MMP9,TFRC	UKF5
IFN-TAM neighborhood	GO Process	Immune effector process	147	3.49692e-08	14	ACP5,SPI1,BST2,SLC7A5,TYROBP,CD81,VAMP8,SUPT6H,LAMP1,TNFRSF14,FGR,VSIG4,TFRC,PHB2	UKF5
IFN-TAM neighborhood	GO Process	Leukocyte activation	88	2.26e-39	38.6459	LCP2,TSPAN32,LAG3,UNC13D,IL2RB,CORO1A,RIPK2,RELB,EBI3,CD79A,NKG7,TNFSF8,CLNK,SPI1,SELPLG,CLEC4A,KLRK1,FLT3,NMI,BATF3,IRF1,CCR7,BST2,TLR2,PRKCQ,LY9,IRF8,SLAMF8,FCER1G,F2RL1,CD3D,BATF2,CLEC7A,IL7R,CCL19,CD84,CD19,LILRB1,WDFY4,CD6,CD28,IKZF1,IKZF3,JAML,CASP8,PSMB10,PTPN22,CD3E,CD247,TLR1,SUCNR1,SLAMF7,SEMA4A,TNFAIP8L2,CD40LG,TREM2,IL2RG,TNFSF13B,GPR183,WAS,RHOH,SH2D2A,HLA-A,GAPT,CARD11,ITGA4,LAT2,LC…	UKF6
IFN-TAM neighborhood	GO Process	T cell activation	54	1.57e-26	25.8041	TSPAN32,LAG3,CORO1A,RIPK2,RELB,EBI3,NKG7,TNFSF8,SPI1,CLEC4A,IRF1,CCR7,PRKCQ,LY9,FCER1G,F2RL1,CD3D,CLEC7A,IL7R,CCL19,CD84,LILRB1,WDFY4,CD28,IKZF3,JAML,CASP8,PSMB10,PTPN22,CD3E,CD247,SLAMF7,SEMA4A,TNFAIP8L2,IL2RG,TNFSF13B,GPR183,WAS,RHOH,SH2D2A,HLA-A,CARD11,LCP1,CD8A,IL18R1,PTPN6,TESPA1,PIK3CG,DOCK2,IDO1,CD3G,LCK,THEMIS,CTPS1	UKF6
IFN-TAM neighborhood	GO Process	Inflammatory response	59	2.56e-19	18.5918	UNC13D,CCL22,RIPK2,RELB,NKG7,CCL2,ADORA3,PTGER2,CCR7,TLR2,PRKCQ,LY75,CD96,CXCL13,SLAMF8,CCR5,F2RL1,C3AR1,CCL11,CLEC7A,CXCL10,CCL19,OLR1,XCR1,PNMA1,CD6,SELE,CCR4,MMP25,FPR3,TLR1,AIM2,S100A8,FCGR1A,TSPAN2,CD40LG,TREM2,CXCR3,HCK,CCL8,IL18R1,CXCR6,IRF5,PIK3CG,TNIP3,LYN,IDO1,SLAMF1,PLD4,PTAFR,CMKLR1,PSTPIP1,FPR2,FPR1,HAMP,CCL5,ADORA2A,BTK,CIITA	UKF6
IFN-TAM neighborhood	GO Process	T cell proliferation	23	3.26e-12	11.4868	CORO1A,RIPK2,EBI3,PRKCQ,CD80,CCL19,CD6,CD28,RASAL3,CCDC88B,PTPN22,CD3E,CD40LG,TNFSF13B,LILRB2,HLA-A,CARD11,PDCD1LG2,HLA-DPA1,HLA-DPB1,SLAMF1,IL12RB1,CCL5	UKF6
IFN-TAM neighborhood	GO Process	α/β T cell activation	21	3.09e-11	10.51	RIPK2,RELB,NKG7,TNFSF8,CLEC4A,IRF1,PRKCQ,LY9,CD3D,WDFY4,CD28,CD3E,CD247,SEMA4A,IL2RG,GPR183,HLA-A,CARD11,IL18R1,DOCK2,CD3G	UKF6
IFN-TAM neighborhood	GO Process	Immune effector process	47	3.04e-17	16.5171	LAG3,UNC13D,GZMB,CORO1A,RELB,NKG7,CLNK,SPI1,KLRK1,NMI,BTN3A3,MYO1G,LY9,IRF8,FCER1G,F2RL1,IL7R,CD19,LILRB1,SUCNR1,SLAMF7,SEMA4A,FCGR1A,CD40LG,CARD9,FCN1,TREM2,FGR,HCK,GPR183,SERPINB9,HLA-A,GAPT,LAT2,LCP1,CSF2RB,CD8A,IL18R1,PTPN6,PRF1,INPP5D,PIK3CG,LYN,DOCK2,SLAMF1,PLCG2,BTK	UKF6

## Sheet: TGFB_IFN_Pathway_Genes
TGFB_Signaling_Genes	p_val	avg_log2FC	pct.1	pct.2	p_val_adj
APP	9.8936e-43	1.35927	0.896	0.565	7.3282e-39
ATF2	1.5876e-09	0.997093	0.333	0.148	1.176e-05
CITED1	3.2371e-08	1.67029	0.151	0.047	0.00023977
ENG	6.8165e-36	1.86929	0.604	0.196	5.049e-32
FOS	3.246e-37	2.0529	0.646	0.227	2.4043e-33
FOSB	5.5637e-18	2.68862	0.182	0.032	4.121e-14
ITGAV	7.9163e-09	0.926634	0.385	0.193	5.8636e-05
ITGB3	6.5186e-18	1.31415	0.438	0.162	4.8284e-14
JUN	3.056e-20	1.69072	0.354	0.103	2.2635e-16
JUNB	8.1865e-55	1.90848	0.833	0.307	6.06e-05
KLF10	2.7725e-11	1.48401	0.219	0.068	2.0536e-07
LEF1	1.7292e-45	2.03175	0.661	0.193	1.2808e-41
MMP1	2.0099e-31	3.76694	0.276	0.042	1.4887e-27
NUP153	1.1182e-07	1.01353	0.271	0.122	0.00082825
PML	9.6149e-22	1.4603	0.484	0.174	7.1218e-18
PPP1CB	1.3234e-12	1.02488	0.448	0.205	9.8025e-09
SPTBN1	9.6572e-19	1.18255	0.609	0.292	7.1531e-15
STAT1	3.9105e-32	1.99143	0.474	0.127	2.8965e-28
STAT3	1.6799e-17	0.982626	0.656	0.326	1.2443e-13
TGFB1	3.0355e-10	1.839	0.49	0.256	2.25e-66
TGFBR1	3.7608e-12	1.91965	0.339	0.135	2.79e-50
TGFBR2	2.629e-09	0.833356	0.479	0.257	1.9473e-05
THBS1	1.9464e-29	1.63214	0.615	0.236	1.4417e-25
TNC	7.7715e-17	1.76535	0.323	0.103	5.7564e-13
UBB	1.3112e-35	1.22343	0.901	0.495	9.7123e-32
UBE2I	8.8416e-11	0.851262	0.49	0.247	6.549e-07
IFN_Signaling_Genes	p_val	avg_log2FC	pct.1	pct.2	p_val_adj
ARID1A	4.51485e-07	0.859587	0.616	0.736	0.00284797
CCL2	1.19879e-08	2.6245	0.045	0.005	7.56199e-05
CD247	1.55558e-19	0.775777	0.298	0.066	1.55884e-15
CD28	7.36774e-43	1.97675	0.684	0.177	7.38321e-39
CD3D	6.5021e-09	0.206392	1	0.986	6.11913e-05
CD3E	3.14968e-12	0.86873	0.456	0.191	3.1563e-08
CD3G	4.51485e-07	1.28476	0.616	0.736	0.00284797
CD81	3.33814e-15	2.29545	0.149	0.024	3.34515e-11
CLEC4A	5.78421e-10	0.624307	0.638	0.396	3.64868e-06
CYLD	2.4835e-14	1.16197	0.287	0.125	2.3372e-10
FGR	2.05838e-11	0.568796	0.989	0.972	1.29843e-07
FN1	1.23553e-16	1.22236	0.184	0.032	1.23813e-12
GBP2	1.7634e-27	1.10319	0.537	0.235	1.6595e-23
GPR183	5.55126e-12	0.723135	0.211	0.054	5.56291e-08
HLA-A	4.72733e-26	2.45054	0.228	0.032	4.73726e-22
HSP90AA1	4.012e-157	1.37717	1	0.999	3.776e-153
IFIH1	3.0781e-13	1.05422	0.322	0.156	2.8968e-09
IFIT3	2.8722e-22	1.14069	0.443	0.193	2.703e-18
IFITM1	5.4674e-41	3.53016	0.175	0.01	5.47888e-37
IL18R1	6.98707e-12	1.16749	0.088	0.011	7.00175e-08
IL2RC	6.19198e-31	1.77641	0.456	0.102	6.20498e-27
IRF1	3.2713e-15	1.09481	0.319	0.142	3.0786e-11
IRF7	4.728e-13	1.18224	0.267	0.118	4.4495e-09
ISG15	1.6662e-18	1.30606	0.322	0.133	1.5681e-14
ISG20	9.1613e-29	1.5376	0.401	0.149	8.6217e-25
ITCH	7.4118e-25	1.09328	0.524	0.244	6.9753e-21
LAMP1	1.18334e-29	1.18975	0.772	0.29	1.18582e-25
LST1	1.19431e-07	0.510606	0.791	0.608	0.000753369
LY9	2.10123e-23	0.825881	0.974	0.587	2.10565e-19
MX1	1.0288e-07	1.12064	0.173	0.081	0.00096818
NKG7	9.86193e-10	0.993858	0.91	0.934	6.22091e-06
NMB	3.7064e-09	1.35566	0.147	0.058	3.4881e-05
RELB	1.3385e-42	1.52109	0.531	0.185	1.2597e-38
RIOK3	2.0818e-35	1.39131	0.502	0.184	1.9592e-31
RIPK2	3.9457e-19	1.79579	0.199	0.058	3.7133e-15
RSAD2	6.4542e-13	1.13419	0.117	0.032	6.0741e-09
SCRIB	1.02485e-15	0.372109	0.989	0.925	6.46474e-12
SPI1	6.86418e-21	1.51922	0.368	0.092	6.87859e-17
SUPT6H	3.36398e-17	0.602964	0.885	0.983	2.122e-13
TFRC	1.6893e-09	2.0772	0.212	0.098	1.5898e-05
TNFSF14	1.45139e-07	0.325607	0.977	0.928	0.000915538
TNFSF8	1.02267e-07	0.419593	0.802	0.605	0.000645097
TYROBP	2.13369e-15	1.27781	0.263	0.065	2.13817e-11
VAMP8	6.98707e-12	1.16749	0.088	0.011	7.00175e-08
VSIG4	5.01285e-07	0.946576	0.559	0.627	0.00316211
XRCC6	1.20486e-24	1.23354	0.982	0.561	1.2074e-20
