# Supplementary material
Source: Research Square preprint supplement (doi:10.21203/rs.3.rs-9692259/v1)
Supplement: Supplementary file 1 [file 2bfa18fb6987dfd335cf58fd.docx]

**Supplementary Information**

**Additional file 1:** PDF file, containing the article-associated supplementary figures (Additional file 1: Fig. S1-S7). A short description of the supplementary figures is given below.

**Fig. S1:** Identification of functionally opposing TAM states.

**Fig. S2:** Lipid metabolism landscape in macrophages.

**Fig. S3:** Spatial characterization of the immune and tumor microenvironment in metastatic melanoma patients undergoing ICI therapy.

**Fig. S4:** Deconvolution of spatial transcriptomics data reveals immune and tumor cell heterogeneity in metastatic melanoma.

**Fig. S5:** Neighborhood analysis of tumor-associated macrophages and CD8+ T cell subsets in metastatic melanoma.

**Fig. S6:** Single-cell protein expression profiling of immune and tumor microenvironment in metastatic melanoma patients.

**Fig. S7:** Immune state classification of pre-ICI cohort.

**Additional file 2:** Table S1. scRNA-seq analysis and compiled Gene-signatures.

**Additional file 3:** Table S2. Lipid-metabolism–related gene sets and DEGs between LAMs and LA-TAMs.

**Additional file 4:** Table S3. Clinical and pathological characterization of melanoma patients and spatial transcriptomics analysis.

**Additional file 5:** Table S4: Signaling Pathway analysis

**Additional file 6:** Table S5: Lipid metabolic Pathway analysis

**Additional file 7:** Table S6: Antibody panel for IMC

**Additional file 8:** Table S7: Melanoma-TME signature matrix, deconvolution of bulk-cohort, and Cox regression analysis
