# Supplementary material
Source: Research Square preprint supplement (doi:10.21203/rs.3.rs-9692259/v1)
Supplement: Supplementary file 2 [file 1583e595a2a7761af8c1d88a.xlsx]

## Sheet: Lipid_Meta_GeneSet#
Lipid_Uptake_and_Transport	Fatty_Acid_Metabolism_General	Fatty_Acid_Oxidation	Fatty_Acid_Synthesis	Lipolysis	Cholesterol_Metabolism	Oxidative_Phosphorylation	Glycolysis	ROS_Production
CD36	ACSL1	CPT1A	ACLY	PNPLA2	HMGCR	NDUFV1	HK1	NOX1
FATP1	ACSL3	CPT1B	ACACA	LIPE	SQLE	NDUFV2	HK2	CYBB
FATP2	ACSL4	CPT1C	FASN	MGLL	DHCR24	NDUFS1	HK3	NOX4
FATP3	ACSL5	CPT2	SCD1	LPL	ACAT1	NDUFS2	GPI	NOX5
FATP4	ACSL6	CRAT	ME1	LIPA	ACAT2	NDUFS3	PFKP	DUOX1
FATP5	ACOT1	ACADVL	GPD1		ABCA1	NDUFS4	PFKL	DUOX2
FATP6	ACOT2	ACADM			ABCG1	NDUFS5	PFKM	NOS2
FABP1	ACOT4	ACADS			NR1H2	NDUFS6	ALDOA	XDH
FABP2	ACOT7	HADHA			NR1H3	NDUFS7	ALDOB	MAOA
FABP3	ACOT8	HADHB			SREBF1	NDUFS8	ALDOC	MAOB
FABP4	ACOT9	ECHS1			SREBF2	NDUFAB1	TPI1
FABP5	ACOT11	DECR1			NPC1	SDHA	GAPDH
FABP6	ACOT12	MECR			NPC2	SDHB	PGK1
FABP7		ETFA				SDHC	PGAM1
FABP9		ETFB				SDHD	ENO1
LDLR		ETFDH				CYTB	ENO2
LRP1						UQCRFS1	ENO3
MSR1						UQCRQ	PKM
SCARB1						UQCRC1	PKLR
						UQCRC2	LDHA
						COX1	LDHB
						COX2
						COX3
						COX4I1
						COX5A
						COX5B
						COX6A1
						ATP5F1A
						ATP5PB
						ATP5PO
						ATP5PF
						SLC25A4

## Sheet: LA-TAM_vs_LAM_DEG
category	term	number_of_genes	number_of_genes_in_background	ncbiTaxonId	inputGenes	preferredNames	p_value	fdr	description	Regulation
Process	GO:0030258	13	220	9606	9606.ENSP00000233710,9606.ENSP00000242592,9606.ENSP00000265512,9606.ENSP00000265838,9606.ENSP00000293217,9606.ENSP00000296412,9606.ENSP00000324944,9606.ENSP00000333664,9606.ENSP00000356015,9606.ENSP00000359871,9606.ENSP00000420269,9606.ENSP00000438689,9606.ENSP00000483018	ACADL,ACADS,ADH4,ACAT1,ACOX1,ADH5,MBOAT1,ACAA1,ACAT2,ACADM,ADH7,ACADVL,ABO	1.84e-08	1.97e-06	Lipid modification	DOWN
Process	GO:0030036	15	516	9606	9606.ENSP00000252699,9606.ENSP00000264436,9606.ENSP00000264758,9606.ENSP00000280155,9606.ENSP00000290378,9606.ENSP00000303909,9606.ENSP00000348381,9606.ENSP00000349960,9606.ENSP00000355645,9606.ENSP00000361423,9606.ENSP00000363092,9606.ENSP00000365227,9606.ENSP00000377941,9606.ENSP00000443495,9606.ENSP00000458162	ACTN4,ADD2,ADD1,ADRA2A,ACTC1,ABR,ADD3,ACTB,ACTA1,ABL1,PRKG1,AIF1,ACTN1,ACTN2,ACTG1	8.95e-06	0.00042	Actin cytoskeleton organization	DOWN
Process	GO:0006635	8	56	9606	9606.ENSP00000233710,9606.ENSP00000242592,9606.ENSP00000265838,9606.ENSP00000293217,9606.ENSP00000333664,9606.ENSP00000356015,9606.ENSP00000359871,9606.ENSP00000438689	ACADL,ACADS,ACAT1,ACOX1,ACAA1,ACAT2,ACADM,ACADVL	2.21e-08	2.29e-06	Fatty acid beta-oxidation	DOWN
Process	GO:0009991	16	483	9606	9606.ENSP00000217426,9606.ENSP00000221561,9606.ENSP00000265838,9606.ENSP00000294724,9606.ENSP00000304501,9606.ENSP00000305372,9606.ENSP00000341044,9606.ENSP00000355645,9606.ENSP00000358301,9606.ENSP00000361965,9606.ENSP00000363868,9606.ENSP00000365227,9606.ENSP00000411613,9606.ENSP00000436607,9606.ENSP00000462647,9606.ENSP00000485525	AHCY,AES,ACAT1,AGL,ADORA2B,ADRB2,ACACB,ACTA1,ADRB1,ADA,ABCA1,AIF1,AOC1,ADM,ADCYAP1,ADSL	8.61e-07	5.59e-05	Response to extracellular stimulus	DOWN
Process	GO:0055114	22	939	9606	9606.ENSP00000209668,9606.ENSP00000216254,9606.ENSP00000233710,9606.ENSP00000242592,9606.ENSP00000265512,9606.ENSP00000265838,9606.ENSP00000293217,9606.ENSP00000294724,9606.ENSP00000296412,9606.ENSP00000306606,9606.ENSP00000309477,9606.ENSP00000333664,9606.ENSP00000343782,9606.ENSP00000356015,9606.ENSP00000357873,9606.ENSP00000359871,9606.ENSP00000378359,9606.ENSP00000411613,9606.ENSP00000420269,…	ADH1A,ACO2,ACADL,ACADS,ADH4,ACAT1,ACOX1,AGL,ADH5,ADH1B,ACO1,ACAA1,ADRB3,ACAT2,ACADSB,ACADM,ADH6,AOC1,ADH7,ADH1C,ACADVL,ADSL	2.1e-06	0.00012	Oxidation-reduction process	DOWN
KEGG	hsa04072	11	147	9606	9606.ENSP00000260600,9606.ENSP00000286355,9606.ENSP00000294016,9606.ENSP00000297323,9606.ENSP00000311405,9606.ENSP00000342952,9606.ENSP00000355627,9606.ENSP00000378187,9606.ENSP00000380271,9606.ENSP00000419361,9606.ENSP00000419422	ADCY3,ADCY8,ADCY9,ADCY1,ADCY6,ADCY2,AGT,ADCY7,RAPGEF4,ADCY5,AGTR1	2.49e-08	2.79e-07	Phospholipase D signaling pathway	DOWN
KEGG	hsa00620	6	38	9606	9606.ENSP00000238618,9606.ENSP00000265838,9606.ENSP00000341044,9606.ENSP00000356015,9606.ENSP00000378161,9606.ENSP00000483300	ACYP1,ACAT1,ACACB,ACAT2,ACYP2,ACACA	8.01e-07	6.34e-06	Pyruvate metabolism	DOWN
KEGG	hsa00982	7	64	9606	9606.ENSP00000209668,9606.ENSP00000265512,9606.ENSP00000296412,9606.ENSP00000306606,9606.ENSP00000378359,9606.ENSP00000420269,9606.ENSP00000426083	ADH1A,ADH4,ADH5,ADH1B,ADH6,ADH7,ADH1C	9.05e-07	6.61e-06	Drug metabolism - cytochrome P450	DOWN
KEGG	hsa00010	7	65	9606	9606.ENSP00000209668,9606.ENSP00000265512,9606.ENSP00000296412,9606.ENSP00000306606,9606.ENSP00000378359,9606.ENSP00000420269,9606.ENSP00000426083	ADH1A,ADH4,ADH5,ADH1B,ADH6,ADH7,ADH1C	9.96e-07	6.83e-06	Glycolysis / Gluconeogenesis	DOWN
KEGG	hsa00630	5	30	9606	9606.ENSP00000216254,9606.ENSP00000265838,9606.ENSP00000302620,9606.ENSP00000309477,9606.ENSP00000356015	ACO2,ACAT1,AGXT,ACO1,ACAT2	5.46e-06	3.16e-05	Glyoxylate and dicarboxylate metabolism	DOWN
GO	GO:0033993	29	858	9606	9606.ENSP00000216139,9606.ENSP00000242057,9606.ENSP00000250615,9606.ENSP00000260600,9606.ENSP00000286355,9606.ENSP00000294724,9606.ENSP00000296412,9606.ENSP00000297323,9606.ENSP00000301732,9606.ENSP00000302620,9606.ENSP00000303909,9606.ENSP00000311405,9606.ENSP00000342952,9606.ENSP00000344155,9606.ENSP00000355627,9606.ENSP00000355645,9606.ENSP00000355759,9606.ENSP00000360973,9606.ENSP00000361423,…	ACR,AHR,AANAT,ADCY3,ADCY8,AGL,ADH5,ADCY1,ABCA3,AGXT,ABR,ADCY6,ADCY2,ABCA2,AGT,ACTA1,PARP1,AGTR2,ABL1,ABCA1,AIF1,NR0B1,ADCY5,ABL2,ADM,ADCYAP1,ACP5,ACACA,ADCYAP1R1	1.03e-11	2.75e-09	Response to lipid	UP
GO	GO:0019395	11	80	9606	9606.ENSP00000233710,9606.ENSP00000242592,9606.ENSP00000265512,9606.ENSP00000265838,9606.ENSP00000293217,9606.ENSP00000296412,9606.ENSP00000333664,9606.ENSP00000356015,9606.ENSP00000359871,9606.ENSP00000420269,9606.ENSP00000438689	ACADL,ACADS,ADH4,ACAT1,ACOX1,ADH5,ACAA1,ACAT2,ACADM,ADH7,ACADVL	6.66e-11	1.38e-08	Fatty acid oxidation	UP
GO	GO:0019752	27	853	9606	9606.ENSP00000209668,9606.ENSP00000216254,9606.ENSP00000217426,9606.ENSP00000233710,9606.ENSP00000242592,9606.ENSP00000253792,9606.ENSP00000261772,9606.ENSP00000265512,9606.ENSP00000265838,9606.ENSP00000293217,9606.ENSP00000296412,9606.ENSP00000302620,9606.ENSP00000306606,9606.ENSP00000309477,9606.ENSP00000333664,9606.ENSP00000341044,9606.ENSP00000355493,9606.ENSP00000356015,9606.ENSP00000357873,…	ADH1A,ACO2,AHCY,ACADL,ACADS,ACLY,AARS,ADH4,ACAT1,ACOX1,ADH5,AGXT,ADH1B,ACO1,ACAA1,ACACB,ADSS,ACAT2,ACADSB,ACADM,ADH6,ABAT,ACY1,ADH7,ADH1C,ACADVL,ACACA	2.45e-10	4.25e-08	Carboxylic acid metabolic process	UP
GO	GO:0032787	21	515	9606	9606.ENSP00000209668,9606.ENSP00000233710,9606.ENSP00000242592,9606.ENSP00000253792,9606.ENSP00000265512,9606.ENSP00000265838,9606.ENSP00000293217,9606.ENSP00000296412,9606.ENSP00000302620,9606.ENSP00000306606,9606.ENSP00000333664,9606.ENSP00000341044,9606.ENSP00000356015,9606.ENSP00000357873,9606.ENSP00000359871,9606.ENSP00000378359,9606.ENSP00000379845,9606.ENSP00000420269,9606.ENSP00000426083,…	ADH1A,ACADL,ACADS,ACLY,ADH4,ACAT1,ACOX1,ADH5,AGXT,ADH1B,ACAA1,ACACB,ACAT2,ACADSB,ACADM,ADH6,ABAT,ADH7,ADH1C,ACADVL,ACACA	4.12e-10	6.61e-08	Monocarboxylic acid metabolic process	UP
GO	GO:0043436	28	944	9606	9606.ENSP00000209668,9606.ENSP00000216254,9606.ENSP00000217426,9606.ENSP00000233710,9606.ENSP00000242592,9606.ENSP00000253792,9606.ENSP00000261772,9606.ENSP00000265512,9606.ENSP00000265838,9606.ENSP00000293217,9606.ENSP00000296412,9606.ENSP00000302620,9606.ENSP00000306606,9606.ENSP00000309477,9606.ENSP00000333664,9606.ENSP00000341044,9606.ENSP00000355493,9606.ENSP00000356015,9606.ENSP00000357873,…	ADH1A,ACO2,AHCY,ACADL,ACADS,ACLY,AARS,ADH4,ACAT1,ACOX1,ADH5,AGXT,ADH1B,ACO1,ACAA1,ACACB,ADSS,ACAT2,ACADSB,ACADM,ADH6,ABAT,ACY1,ACAN,ADH7,ADH1C,ACADVL,ACACA	4.54e-10	7.2e-08	Oxoacid metabolic process	UP
KEGG	hsa04022	22	162	9606	9606.ENSP00000260600,9606.ENSP00000280155,9606.ENSP00000281456,9606.ENSP00000286355,9606.ENSP00000294016,9606.ENSP00000297323,9606.ENSP00000305372,9606.ENSP00000306662,9606.ENSP00000311405,9606.ENSP00000342952,9606.ENSP00000343782,9606.ENSP00000356205,9606.ENSP00000358301,9606.ENSP00000363092,9606.ENSP00000368766,9606.ENSP00000369960,9606.ENSP00000370808,9606.ENSP00000378187,9606.ENSP00000386069,…	ADCY3,ADRA2A,SLC25A4,ADCY8,ADCY9,ADCY1,ADRB2,ADRA1B,ADCY6,ADCY2,ADRB3,ADORA1,ADRB1,PRKG1,ADRA1D,ADRA1A,SLC25A6,ADCY7,ADRA2C,ADCY5,AGTR1,ADRA2B	1.34e-20	4.5e-18	cGMP-PKG signaling pathway	UP
KEGG	hsa00071	15	42	9606	9606.ENSP00000209668,9606.ENSP00000233710,9606.ENSP00000242592,9606.ENSP00000265512,9606.ENSP00000265838,9606.ENSP00000293217,9606.ENSP00000296412,9606.ENSP00000306606,9606.ENSP00000333664,9606.ENSP00000356015,9606.ENSP00000357873,9606.ENSP00000378359,9606.ENSP00000420269,9606.ENSP00000426083,9606.ENSP00000438689	ADH1A,ACADL,ACADS,ADH4,ACAT1,ACOX1,ADH5,ADH1B,ACAA1,ACAT2,ACADSB,ADH6,ADH7,ADH1C,ACADVL	8.07e-20	1.36e-17	Fatty acid degradation	UP
KEGG	hsa04923	13	54	9606	9606.ENSP00000260600,9606.ENSP00000286355,9606.ENSP00000294016,9606.ENSP00000297323,9606.ENSP00000305372,9606.ENSP00000311405,9606.ENSP00000342952,9606.ENSP00000343782,9606.ENSP00000356205,9606.ENSP00000358301,9606.ENSP00000363092,9606.ENSP00000378187,9606.ENSP00000419361	ADCY3,ADCY8,ADCY9,ADCY1,ADRB2,ADCY6,ADCY2,ADRB3,ADORA1,ADRB1,PRKG1,ADCY7,ADCY5	1.93e-15	9.26e-14	Regulation of lipolysis in adipocytes	UP
KEGG	hsa04020	17	193	9606	9606.ENSP00000260600,9606.ENSP00000281456,9606.ENSP00000286355,9606.ENSP00000294016,9606.ENSP00000297323,9606.ENSP00000304501,9606.ENSP00000305372,9606.ENSP00000306662,9606.ENSP00000336630,9606.ENSP00000342952,9606.ENSP00000343782,9606.ENSP00000358301,9606.ENSP00000368766,9606.ENSP00000369960,9606.ENSP00000370808,9606.ENSP00000378187,9606.ENSP00000419422	ADCY3,SLC25A4,ADCY8,ADCY9,ADCY1,ADORA2B,ADRB2,ADRA1B,ADORA2A,ADCY2,ADRB3,ADRB1,ADRA1D,ADRA1A,SLC25A6,ADCY7,AGTR1	2.71e-13	1.14e-11	Calcium signaling pathway	UP
KEGG	hsa01212	9	54	9606	9606.ENSP00000233710,9606.ENSP00000242592,9606.ENSP00000265838,9606.ENSP00000293217,9606.ENSP00000333664,9606.ENSP00000356015,9606.ENSP00000357873,9606.ENSP00000438689,9606.ENSP00000483300	ACADL,ACADS,ACAT1,ACOX1,ACAA1,ACAT2,ACADSB,ACADVL,ACACA	8.29e-10	1.64e-08	Fatty acid metabolism	UP
KEGG	hsa00640	7	34	9606	9606.ENSP00000242592,9606.ENSP00000265838,9606.ENSP00000293217,9606.ENSP00000341044,9606.ENSP00000356015,9606.ENSP00000379845,9606.ENSP00000483300	ACADS,ACAT1,ACOX1,ACACB,ACAT2,ABAT,ACACA	1.84e-08	2.29e-07	Propanoate metabolism	UP
