# Supplementary material
Source: Research Square preprint supplement (doi:10.21203/rs.3.rs-9692259/v1)
Supplement: Supplementary file 4 [file 3b30302e358baacde2ea0821.xlsx]

## Sheet: Sade-Feldman_Cluster_DEG
gene	p_val	avg_log2FC	pct.1	pct.2	p_val_adj	cluster
PSAP	4.37748e-91	0.453871	0.997	0.992	2.43983e-86	0
FCN1	2.8684e-84	1.04364	0.904	0.541	1.59873e-79	0
FTH1	4.6644e-82	0.480918	1	0.999	2.59975e-77	0
OAZ1	3.47497e-80	0.422715	0.984	0.983	1.93681e-75	0
SAT1	5.1373e-79	0.517521	1	0.996	2.86332e-74	0
SRGN	2.36678e-78	0.488336	0.987	0.979	1.31915e-73	0
TPT1	3.8315e-77	0.407284	0.984	0.997	2.13552e-72	0
MALAT1	9.75827e-77	0.510153	1	0.993	5.43887e-72	0
EEF1A1	4.53387e-76	0.376884	0.987	0.999	2.527e-71	0
PABPC1	5.21856e-76	0.419029	0.99	0.996	2.90862e-71	0
HLA-B	7.58415e-76	0.433144	1	1	4.2271e-71	0
B2M	8.47086e-76	0.413745	1	0.998	4.72132e-71	0
SH3BGRL3	2.30096e-75	0.406207	0.984	0.991	1.28246e-70	0
RPL10	1.04625e-74	0.410575	0.984	0.99	5.8314e-70	0
MT-RNR1	3.29634e-74	0.431707	1	1	1.83725e-69	0
FTL	4.1385e-74	0.41952	0.99	1	2.30663e-69	0
EIF1	7.10097e-74	0.442282	0.978	0.992	3.9578e-69	0
MT-RNR2	1.27285e-73	0.428529	1	1	7.09436e-69	0
RPS9	2.94951e-73	0.424146	0.974	0.989	1.64394e-68	0
NEAT1	6.26626e-73	0.551158	0.994	0.98	3.49256e-68	0
TYROBP	1.61183e-72	0.433726	0.984	0.963	8.98371e-68	0
DUSP1	9.58233e-72	0.59246	0.958	0.938	5.34081e-67	0
IFI30	4.62843e-71	0.423953	0.987	0.99	2.5797e-66	0
HLA-A	5.81665e-71	0.413001	0.997	0.994	3.24197e-66	0
HLA-C	9.17886e-71	0.393088	1	0.999	5.11593e-66	0
FCER1G	2.45982e-70	0.417468	0.978	0.959	1.37101e-65	0
ACTB	5.02191e-69	0.360733	1	1	2.79901e-64	0
SERPINA1	1.12645e-68	0.523441	0.942	0.89	6.27839e-64	0
RPS3A	1.34857e-68	0.397167	0.974	0.977	7.51637e-64	0
CTSS	2.43584e-68	0.447756	0.952	0.973	1.35764e-63	0
LAPTM5	2.62383e-68	0.380008	0.994	0.992	1.46242e-63	0
TMSB4X	2.70326e-68	0.364662	0.997	0.997	1.50669e-63	0
RPL41	3.04901e-68	0.362593	0.987	0.996	1.6994e-63	0
MT-ND1	7.53663e-68	0.414665	0.994	1	4.20062e-63	0
HLA-E	1.17367e-67	0.410338	0.994	0.992	6.54158e-63	0
RPL18A	1.7237e-67	0.403895	0.971	0.973	9.60724e-63	0
MT-ND4L	1.78107e-67	0.401859	0.994	0.998	9.92696e-63	0
NAMPT	1.88548e-67	0.615495	0.942	0.906	1.05089e-62	0
MT-ND4	2.05027e-67	0.407447	1	0.998	1.14274e-62	0
RPL13A	1.35647e-66	0.374884	0.962	0.983	7.56044e-62	0
JUNB	4.56094e-66	0.490497	0.965	0.966	2.54208e-61	0
MT-CO1	9.48343e-66	0.403088	1	1	5.28569e-61	0
RPL13	5.55143e-65	0.383278	0.962	0.992	3.09414e-60	0
PTMA	9.39388e-65	0.360125	0.978	0.993	5.23578e-60	0
ZFP36	2.82712e-64	0.503414	0.968	0.973	1.57573e-59	0
RPS16	4.23038e-64	0.384094	0.949	0.969	2.35784e-59	0
RPS3	4.36683e-64	0.379937	0.958	0.975	2.43389e-59	0
PPP1R15A	4.42228e-64	0.561474	0.946	0.934	2.4648e-59	0
H3F3A	5.60406e-64	0.379113	0.962	0.979	3.12348e-59	0
S100A11	1.1188e-63	0.366892	0.971	0.989	6.23575e-59	0
H3F3B	2.61135e-63	0.41127	0.978	0.988	1.45546e-58	0
CFL1	3.3286e-63	0.330198	0.971	0.993	1.85523e-58	0
RPL21	4.92832e-63	0.390854	0.946	0.961	2.74685e-58	0
LYZ	8.78373e-63	0.4517	0.968	0.979	4.8957e-58	0
GABARAP	1.00343e-62	0.400032	0.962	0.982	5.59274e-58	0
MT-ND2	1.09467e-62	0.39298	0.984	0.999	6.10124e-58	0
MT-CO2	1.38769e-62	0.398474	0.99	0.998	7.73442e-58	0
RPL8	6.88682e-62	0.370266	0.955	0.977	3.83844e-57	0
PLAUR	8.26092e-62	0.600512	0.93	0.892	4.60431e-57	0
PFN1	1.43672e-61	0.329999	0.965	0.988	8.00772e-57	0
RPL4	7.05781e-61	0.359073	0.952	0.969	3.93374e-56	0
MT-ATP6	7.59871e-61	0.393195	0.987	0.996	4.23522e-56	0
HNRNPH1	1.20563e-60	0.412608	0.984	0.994	6.71971e-56	0
VMP1	1.76411e-60	0.527541	0.952	0.948	9.83247e-56	0
RP5-940J5.9	1.97331e-60	0.368233	0.978	0.992	1.09984e-55	0
COTL1	3.34334e-60	0.501129	0.939	0.936	1.86345e-55	0
TIMP1	4.79578e-60	0.67224	0.911	0.873	2.67297e-55	0
RPL28	6.1966e-60	0.353344	0.968	0.989	3.45374e-55	0
EIF4A1	1.11919e-59	0.392022	0.939	0.965	6.23793e-55	0
EEF1A1P5	2.15741e-59	0.320137	0.952	0.98	1.20245e-54	0
RPS8	2.26094e-59	0.358027	0.946	0.971	1.26016e-54	0
GAPDH	2.26139e-59	0.340891	0.971	0.995	1.26041e-54	0
RPLP1	2.54616e-59	0.34244	0.952	0.985	1.41913e-54	0
ITGAX	2.63729e-59	0.576223	0.981	0.925	1.46992e-54	0
RPL11	2.72906e-59	0.361589	0.952	0.982	1.52107e-54	0
RPL15	3.18165e-59	0.326059	0.952	0.986	1.77333e-54	0
FGR	6.44811e-59	0.682729	0.875	0.786	3.59392e-54	0
GNB2L1	7.39861e-59	0.356254	0.958	0.976	4.12369e-54	0
RPS11	7.54397e-59	0.354467	0.952	0.977	4.20471e-54	0
RPL9	1.63487e-58	0.360003	0.936	0.964	9.11209e-54	0
RPL3	4.57187e-58	0.336335	0.955	0.977	2.54818e-53	0
RPS27A	5.65265e-58	0.366766	0.939	0.955	3.15056e-53	0
MT-CYB	1.0796e-57	0.40378	0.978	0.992	6.01726e-53	0
RPS14	1.43499e-57	0.369672	0.946	0.968	7.99808e-53	0
HLA-H	4.87845e-57	0.360277	1	0.987	2.71905e-52	0
CLIC1	5.52506e-57	0.366662	0.949	0.96	3.07945e-52	0
MYL6	7.64671e-57	0.32794	0.952	0.979	4.26197e-52	0
NFKBIA	8.53528e-57	0.583054	0.901	0.915	4.75722e-52	0
RPL17	9.90501e-57	0.351669	0.939	0.973	5.52065e-52	0
TMSB10	1.72074e-56	0.324035	0.987	1	9.5907e-52	0
RPLP2	1.32616e-55	0.349467	0.952	0.978	7.39148e-51	0
APOBEC3A	1.70892e-55	1.21665	0.642	0.207	9.52486e-51	0
RPL26	2.97216e-55	0.355313	0.927	0.959	1.65656e-50	0
RPS6	3.67609e-55	0.3333	0.939	0.974	2.04891e-50	0
RPL7	4.9701e-55	0.354261	0.933	0.965	2.77014e-50	0
CD68	5.1589e-55	0.451151	0.936	0.912	2.87537e-50	0
FAU	6.36653e-55	0.364865	0.936	0.971	3.54845e-50	0
CTSB	8.68599e-55	0.346824	0.987	0.971	4.84122e-50	0
RPS28	1.0945e-54	0.350169	0.939	0.964	6.1003e-50	0
RPL19	1.85856e-54	0.320084	0.936	0.986	1.03589e-49	0
YWHAZ	4.65389e-54	0.349081	0.968	0.985	2.59389e-49	0
RPS19	4.84966e-54	0.327255	0.946	0.981	2.70301e-49	0
CD300E	1.1986e-53	1.01284	0.767	0.425	6.68051e-49	0
CD55	1.49518e-53	0.72138	0.882	0.805	8.33353e-49	0
RPL6	2.7245e-53	0.343331	0.917	0.969	1.51853e-48	0
ALDOA	3.25476e-53	0.342112	0.93	0.98	1.81407e-48	0
SERF2	5.80536e-53	0.336544	0.952	0.984	3.23568e-48	0
CTD-2031P19.4	1.4847e-52	0.340831	0.942	0.966	8.27511e-48	0
CDC42	2.40032e-52	0.3534	0.939	0.971	1.33784e-47	0
ACTG1	2.66467e-52	0.30406	0.952	0.978	1.48518e-47	0
LCP1	3.89161e-52	0.34631	0.942	0.971	2.16903e-47	0
RPL23A	4.96574e-52	0.342847	0.917	0.955	2.76771e-47	0
S100A6	5.47854e-52	0.388009	0.927	0.932	3.05352e-47	0
H3F3AP4	1.10158e-51	0.353358	0.933	0.975	6.13977e-47	0
FTLP3	1.35912e-51	0.395238	0.965	0.949	7.57522e-47	0
MT-CO3	3.02682e-51	0.360766	0.974	0.991	1.68703e-46	0
EEF2	4.33784e-51	0.349027	0.927	0.957	2.41774e-46	0
RHOA	4.59387e-51	0.316485	0.917	0.977	2.56044e-46	0
UBA52	4.83242e-51	0.325011	0.933	0.977	2.6934e-46	0
RPS24	5.06308e-51	0.317977	0.936	0.977	2.82196e-46	0
ARPC3	5.39673e-51	0.308415	0.927	0.974	3.00792e-46	0
MT-ND5	5.71171e-51	0.342469	0.955	0.996	3.18348e-46	0
ANXA5	6.06694e-51	0.363542	0.923	0.956	3.38147e-46	0
RPS27	1.22338e-50	0.332096	0.93	0.967	6.81861e-46	0
NACA	7.1991e-50	0.328854	0.917	0.958	4.01249e-45	0
BCL2A1	9.44252e-50	0.725058	0.815	0.736	5.26288e-45	0
MT-ND3	1.008e-49	0.348718	0.939	0.98	5.61816e-45	0
CD44	1.45963e-49	0.428503	0.952	0.949	8.13538e-45	0
VCAN	2.26363e-49	0.894895	0.812	0.553	1.26166e-44	0
PFDN5	2.5008e-49	0.384097	0.898	0.942	1.39385e-44	0
VIM	3.53605e-49	0.333491	0.965	0.982	1.97085e-44	0
ARHGDIB	3.64992e-49	0.31341	0.911	0.961	2.03432e-44	0
RPL7A	3.70602e-49	0.329335	0.917	0.954	2.06559e-44	0
DDX5	4.60402e-49	0.334298	0.965	0.99	2.5661e-44	0
SOD2	4.68431e-49	0.557288	0.901	0.903	2.61085e-44	0
RPS25	4.82004e-49	0.325829	0.933	0.958	2.6865e-44	0
LSP1	7.83871e-49	0.576729	0.92	0.764	4.36898e-44	0
UBC	1.73956e-48	0.366775	0.962	0.991	9.69563e-44	0
FPR1	4.27294e-48	0.729393	0.812	0.641	2.38157e-43	0
RPS15	7.46143e-48	0.324974	0.933	0.97	4.1587e-43	0
MT-ATP8	1.09805e-47	0.359485	0.946	0.977	6.12011e-43	0
RPS13	1.52919e-47	0.310171	0.911	0.96	8.52307e-43	0
RP11-742N3.1	1.62147e-47	0.351727	0.923	0.952	9.03742e-43	0
RP11-1143G9.4	2.15414e-47	0.374882	0.942	0.968	1.20063e-42	0
RPL30	4.24296e-47	0.316488	0.907	0.958	2.36486e-42	0
RPL10A	6.62961e-47	0.33294	0.895	0.943	3.69508e-42	0
RPL34	9.55339e-47	0.350193	0.914	0.955	5.32468e-42	0
RPL5	1.19082e-46	0.289035	0.93	0.97	6.63717e-42	0
RPS12	1.41683e-46	0.308345	0.914	0.959	7.89683e-42	0
RNASEK	1.54248e-46	0.307059	0.898	0.965	8.59719e-42	0
AIF1	1.77837e-46	0.347261	0.901	0.949	9.91194e-42	0
ENO1	1.94975e-46	0.33044	0.933	0.962	1.08671e-41	0
RPS4X	3.7771e-46	0.297807	0.93	0.968	2.1052e-41	0
RPS18	3.98848e-46	0.301047	0.933	0.967	2.22302e-41	0
RPL35A	1.71583e-45	0.340443	0.914	0.952	9.56335e-41	0
PPIA	4.95784e-45	0.255019	0.946	0.979	2.7633e-40	0
RPL29	6.42355e-45	0.329318	0.898	0.94	3.58023e-40	0
CD74	9.35669e-45	0.301048	0.987	0.997	5.21505e-40	0
RPLP0	1.2628e-44	0.285214	0.93	0.971	7.03834e-40	0
ARPC2	1.52392e-44	0.281836	0.933	0.978	8.49373e-40	0
S100A4	4.43019e-44	0.425881	0.856	0.846	2.46921e-39	0
SLC11A1	5.4329e-44	0.737644	0.853	0.649	3.02808e-39	0
FOS	6.02091e-44	0.4106	0.904	0.937	3.35581e-39	0
RPL41P1	6.48009e-44	0.315524	0.907	0.943	3.61174e-39	0
FTH1P10	8.83076e-44	0.47958	0.933	0.901	4.92191e-39	0
CTSD	3.95265e-43	0.494769	0.898	0.849	2.20305e-38	0
RPS2	4.23636e-43	0.349018	0.901	0.951	2.36118e-38	0
LILRB2	6.11506e-43	0.536451	0.891	0.829	3.40829e-38	0
ITM2B	6.23809e-43	0.315445	0.914	0.963	3.47686e-38	0
RPL27	6.44246e-43	0.321041	0.891	0.924	3.59077e-38	0
CFP	7.03265e-43	0.888335	0.725	0.416	3.91972e-38	0
TPI1	1.28949e-42	0.343866	0.927	0.957	7.18711e-38	0
RPS23	1.33341e-42	0.31644	0.907	0.949	7.4319e-38	0
RPL12	1.8146e-42	0.307026	0.898	0.954	1.01139e-37	0
ANXA2	1.83486e-42	0.296318	0.923	0.946	1.02268e-37	0
RPL39	2.07236e-42	0.306497	0.872	0.946	1.15505e-37	0
EEF1D	2.3825e-42	0.374299	0.872	0.928	1.32791e-37	0
TPP1	2.45535e-42	0.315467	0.936	0.978	1.36851e-37	0
ARF1	4.49771e-42	0.335559	0.869	0.929	2.50684e-37	0
CST3	6.55978e-42	0.31817	0.93	0.986	3.65616e-37	0
HLA-F	7.01926e-42	0.450993	0.974	0.969	3.91225e-37	0
NAMPTL	9.47013e-42	0.655668	0.866	0.792	5.27827e-37	0
LILRA5	1.19212e-41	0.956992	0.706	0.396	6.64441e-37	0
RPL32	1.23207e-41	0.317564	0.898	0.951	6.86704e-37	0
EMP3	1.4282e-41	0.390066	0.891	0.914	7.96019e-37	0
HLA-DRA	1.65093e-41	0.278417	0.962	0.989	9.20164e-37	0
SLC25A6	9.0212e-41	0.322951	0.923	0.952	5.02806e-36	0
RPL18	9.48066e-41	0.303799	0.888	0.946	5.28414e-36	0
TNFRSF1B	1.34264e-40	0.624288	0.827	0.756	7.48333e-36	0
RP11-290F20.3	2.19641e-40	0.919264	0.719	0.508	1.22419e-35	0
PTPRC	2.57852e-40	0.351677	0.968	0.988	1.43717e-35	0
MGAT1	2.05102e-39	0.468939	0.888	0.916	1.14315e-34	0
GRN	6.12773e-39	0.269547	0.927	0.981	3.41535e-34	0
RPS15A	1.46372e-38	0.286556	0.869	0.947	8.15818e-34	0
FTH1P7	2.75154e-38	0.454082	0.866	0.852	1.5336e-33	0
C9orf72	2.88666e-38	0.561938	0.824	0.8	1.60891e-33	0
HNRNPK	3.18747e-38	0.296666	0.911	0.948	1.77657e-33	0
COX4I1	4.68178e-38	0.274398	0.891	0.961	2.60944e-33	0
APLP2	4.75919e-38	0.452939	0.875	0.872	2.65258e-33	0
FLNA	6.18648e-38	0.468736	0.898	0.898	3.4481e-33	0
RPS7	8.10141e-38	0.278153	0.875	0.945	4.5154e-33	0
ZEB2	3.04796e-37	0.455884	0.888	0.881	1.69881e-32	0
RBM39	4.90973e-37	0.380436	0.923	0.964	2.73649e-32	0
PKM	1.02585e-36	0.324785	0.946	0.972	5.71769e-32	0
S100A9	1.32466e-36	0.635578	0.783	0.686	7.38311e-32	0
MSN	1.6527e-36	0.305124	0.891	0.945	9.21151e-32	0
MTRNR2L12	2.51837e-36	0.29767	0.978	0.983	1.40364e-31	0
HNRNPA1	3.6021e-36	0.271442	0.895	0.961	2.00767e-31	0
RPL9P9	3.90025e-36	0.271902	0.904	0.94	2.17385e-31	0
RPL31	4.01833e-36	0.265047	0.879	0.946	2.23966e-31	0
DAZAP2	7.70219e-36	0.317622	0.895	0.953	4.2929e-31	0
RP11-572P18.1	8.33093e-36	0.351242	0.856	0.894	4.64333e-31	0
ZYX	1.1402e-35	0.404509	0.882	0.908	6.35503e-31	0
LCP2	1.78027e-35	0.55973	0.866	0.839	9.92252e-31	0
HNRNPA2B1	1.86114e-35	0.303287	0.904	0.965	1.03732e-30	0
RPL9P8	2.78661e-35	0.267406	0.901	0.94	1.55314e-30	0
TMSB4XP8	3.08579e-35	0.275601	0.949	0.977	1.7199e-30	0
RPL27A	3.22801e-35	0.25109	0.879	0.954	1.79916e-30	0
NCF2	5.42531e-35	0.501157	0.815	0.783	3.02385e-30	0
NPIPB4	5.94032e-35	0.387693	0.939	0.966	3.3109e-30	0
NPC2	1.10482e-34	0.267178	0.891	0.945	6.15784e-30	0
RPS3AP6	1.20039e-34	0.330574	0.866	0.901	6.69048e-30	0
AQP9	1.49325e-34	0.973875	0.633	0.408	8.32278e-30	0
LST1	1.57803e-34	0.409445	0.805	0.851	8.79532e-30	0
PSMA7	2.99494e-34	0.308016	0.831	0.905	1.66926e-29	0
ANXA1	3.15233e-34	0.393176	0.85	0.884	1.75699e-29	0
RPS29	4.20092e-34	0.274327	0.882	0.938	2.34142e-29	0
CD37	4.20574e-34	0.416086	0.837	0.859	2.34411e-29	0
RPL14	4.48124e-34	0.272467	0.859	0.94	2.49766e-29	0
C5AR1	4.79736e-34	0.659677	0.783	0.668	2.67386e-29	0
FCGR2A	6.59039e-34	0.440159	0.888	0.862	3.67322e-29	0
CHP1	7.80843e-34	0.336082	0.821	0.894	4.3521e-29	0
HNRNPC	3.74754e-33	0.270979	0.885	0.961	2.08873e-28	0
TREM1	4.77076e-33	0.670822	0.757	0.633	2.65903e-28	0
IL1B	7.30326e-33	0.879742	0.687	0.518	4.07055e-28	0
MTRNR2L2	9.72332e-33	0.342251	0.981	0.971	5.41939e-28	0
S100A8	1.13165e-32	0.800193	0.684	0.491	6.30735e-28	0
WARS	1.2098e-32	0.39948	0.869	0.892	6.74297e-28	0
CDKN1A	3.54515e-32	0.583321	0.805	0.756	1.97592e-27	0
LGALS1	4.79474e-32	0.290693	0.859	0.907	2.6724e-27	0
CTC-575D19.1	7.02227e-32	0.31166	0.856	0.911	3.91393e-27	0
PGK1	1.04942e-31	0.269038	0.863	0.947	5.84905e-27	0
CD53	1.232e-31	0.318048	0.856	0.93	6.86668e-27	0
PILRA	1.33251e-31	0.471792	0.815	0.8	7.42688e-27	0
CAPZA1	1.45509e-31	0.25455	0.898	0.974	8.11008e-27	0
UBXN11	1.92406e-31	0.606273	0.942	0.92	1.07239e-26	0
LILRB3	2.11289e-31	0.478144	0.853	0.829	1.17764e-26	0
NFKBIZ	2.27736e-31	0.551218	0.802	0.81	1.26931e-26	0
RNF149	2.91068e-31	0.413276	0.853	0.883	1.6223e-26	0
LILRA6	4.09582e-31	0.501409	0.837	0.807	2.28284e-26	0
SLC2A3	4.11285e-31	0.508222	0.802	0.833	2.29234e-26	0
RP11-925D8.5	4.69547e-31	0.908085	0.291	0.063	2.61707e-26	0
IFNGR2	7.81781e-31	0.428846	0.863	0.885	4.35733e-26	0
ASAH1	1.31103e-30	0.429502	0.812	0.83	7.30716e-26	0
RPL36A	1.40007e-30	0.29183	0.84	0.935	7.80345e-26	0
WSB1	2.86481e-30	0.419088	0.891	0.931	1.59673e-25	0
CNBP	3.90694e-30	0.295832	0.843	0.926	2.17757e-25	0
IER2	9.99558e-30	0.412725	0.831	0.871	5.57114e-25	0
HIF1A	1.8901e-29	0.432143	0.863	0.882	1.05347e-24	0
BEST1	2.03109e-29	0.526257	0.933	0.914	1.13205e-24	0
LGALS3	6.94439e-29	0.373035	0.815	0.867	3.87053e-24	0
PPP1CB	1.25581e-28	0.318736	0.898	0.956	6.99937e-24	0
CLEC7A	1.28234e-28	0.315383	0.888	0.908	7.14723e-24	0
RAB7A	1.42744e-28	0.293453	0.879	0.936	7.95597e-24	0
PID1	1.50681e-28	0.809909	0.562	0.275	8.39835e-24	0
LRRFIP1	1.50777e-28	0.39589	0.885	0.937	8.40369e-24	0
STK10	2.02828e-28	0.702662	0.754	0.674	1.13048e-23	0
GRB2	2.55889e-28	0.278923	0.888	0.957	1.42622e-23	0
FOSL2	2.6108e-28	0.6101	0.847	0.803	1.45515e-23	0
STXBP2	5.01277e-28	0.400661	0.789	0.816	2.79392e-23	0
CD52	6.94704e-28	0.671346	0.69	0.522	3.872e-23	0
C10orf54	8.84604e-28	0.407277	0.812	0.843	4.93043e-23	0
SERPINB9	1.80437e-27	0.502192	0.815	0.84	1.00568e-22	0
HLA-G	1.94559e-27	0.295958	0.907	0.938	1.0844e-22	0
TSPO	3.18212e-27	0.282399	0.808	0.87	1.77359e-22	0
HNRNPL	3.62708e-27	0.314312	0.895	0.96	2.02159e-22	0
TCIRG1	5.08612e-27	0.381352	0.812	0.875	2.8348e-22	0
HLA-L	6.95319e-27	0.350977	0.863	0.899	3.87543e-22	0
ALDH1A2	8.01727e-27	1.01029	0.428	0.183	4.46851e-22	0
RPL18AP3	1.0091e-26	0.273121	0.843	0.911	5.62433e-22	0
UPP1	1.44705e-26	0.579601	0.712	0.699	8.06528e-22	0
SRSF5	1.4754e-26	0.326743	0.812	0.907	8.22326e-22	0
CORO1A	1.80492e-26	0.324137	0.827	0.883	1.00599e-21	0
SERP1	1.80877e-26	0.358065	0.796	0.868	1.00814e-21	0
LDHA	2.75381e-26	0.286811	0.856	0.945	1.53486e-21	0
CFD	4.11068e-26	0.830888	0.575	0.35	2.29113e-21	0
IFITM2	4.61964e-26	0.395052	0.834	0.88	2.5748e-21	0
FXYD5	6.13277e-26	0.294366	0.812	0.915	3.41816e-21	0
STK17B	1.30007e-25	0.427775	0.859	0.84	7.24608e-21	0
SDCBP	2.31362e-25	0.334904	0.824	0.894	1.28952e-20	0
TKT	3.19131e-25	0.369545	0.77	0.833	1.77871e-20	0
RPL13AP5	4.93523e-25	0.292111	0.84	0.874	2.7507e-20	0
MPEG1	5.32486e-25	0.446252	0.796	0.786	2.96786e-20	0
HCLS1	1.37735e-24	0.26374	0.827	0.924	7.67679e-20	0
FTH1P8	2.31859e-24	0.523791	0.716	0.649	1.29229e-19	0
MCL1	2.73527e-24	0.397134	0.831	0.899	1.52453e-19	0
ZFP36L1	3.76354e-24	0.308572	0.872	0.945	2.09765e-19	0
PRELID1	5.25229e-24	0.321993	0.754	0.848	2.92742e-19	0
CD14	6.80602e-24	0.361259	0.805	0.785	3.79341e-19	0
ARRB2	7.25472e-24	0.445184	0.792	0.839	4.04349e-19	0
MYADM	9.77937e-24	0.423498	0.827	0.862	5.45063e-19	0
NPIPB5	2.38167e-23	0.367139	0.875	0.937	1.32745e-18	0
FOSB	5.20703e-23	0.406302	0.847	0.89	2.90219e-18	0
CSF3R	8.11514e-23	0.521569	0.767	0.749	4.52305e-18	0
EHD1	8.86445e-23	0.760698	0.613	0.458	4.94069e-18	0
S100A12	1.75951e-22	0.907838	0.278	0.081	9.80679e-18	0
SON	2.00131e-22	0.300613	0.85	0.945	1.11545e-17	0
ATP6V0C	2.26442e-22	0.30737	0.872	0.903	1.2621e-17	0
NINJ1	3.85847e-22	0.442959	0.767	0.775	2.15056e-17	0
TRA2A	4.46605e-22	0.318739	0.824	0.927	2.4892e-17	0
RAC2	7.06226e-22	0.427798	0.741	0.748	3.93622e-17	0
PLIN2	9.26659e-22	0.665376	0.709	0.66	5.16483e-17	0
CFLAR	9.53422e-22	0.389975	0.831	0.91	5.31399e-17	0
NR4A1	1.00556e-21	0.54237	0.757	0.747	5.60459e-17	0
CTNNB1	1.05649e-21	0.364021	0.885	0.954	5.88845e-17	0
EIF2S3	1.33748e-21	0.250508	0.834	0.925	7.45457e-17	0
TGFBI	2.34199e-21	0.255413	0.84	0.918	1.30533e-16	0
STAT6	4.42196e-21	0.431166	0.796	0.819	2.46462e-16	0
RGS2	5.13385e-21	0.388981	0.776	0.799	2.8614e-16	0
SIGLEC14	7.74019e-21	0.548089	0.712	0.613	4.31407e-16	0
CEBPB	8.20392e-21	0.605646	0.725	0.639	4.57254e-16	0
HSP90AA1	8.32473e-21	0.266157	0.856	0.948	4.63987e-16	0
ANKRD10	1.2106e-20	0.332514	0.799	0.9	6.74742e-16	0
NLRP3	2.28565e-20	0.739325	0.642	0.536	1.27393e-15	0
IFNGR1	2.53637e-20	0.327857	0.85	0.898	1.41367e-15	0
LRP1	3.92173e-20	0.374666	0.847	0.829	2.18582e-15	0
RNF130	4.84384e-20	0.328416	0.757	0.842	2.69976e-15	0
TYMP	6.13435e-20	0.306915	0.85	0.913	3.41904e-15	0
CYBB	6.97828e-20	0.280577	0.898	0.894	3.88942e-15	0
DUSP6	8.25587e-20	0.628373	0.636	0.548	4.60149e-15	0
ATP6V1B2	1.09582e-19	0.327572	0.783	0.839	6.10766e-15	0
TNFAIP3	1.15022e-19	0.503592	0.741	0.787	6.41089e-15	0
GPCPD1	1.50249e-19	0.516147	0.757	0.768	8.37428e-15	0
SLC25A37	1.51536e-19	0.663371	0.674	0.6	8.44601e-15	0
GLUL	1.84346e-19	0.267898	0.863	0.903	1.02747e-14	0
FTH1P23	2.17914e-19	0.413382	0.716	0.679	1.21456e-14	0
PTPRE	2.65227e-19	0.399219	0.792	0.81	1.47827e-14	0
NOTCH2NL	2.94877e-19	0.494892	0.783	0.757	1.64353e-14	0
NPIPB3	5.05821e-19	0.382973	0.859	0.914	2.81924e-14	0
FTH1P20	5.11935e-19	0.412471	0.719	0.686	2.85332e-14	0
CD83	7.2816e-19	0.476017	0.805	0.84	4.05847e-14	0
FYB	8.25582e-19	0.363747	0.796	0.824	4.60146e-14	0
KLF6	9.69359e-19	0.301112	0.907	0.95	5.40282e-14	0
FPR2	2.67227e-18	0.857982	0.399	0.21	1.48942e-13	0
FTH1P11	2.67406e-18	0.483592	0.658	0.569	1.49041e-13	0
CECR1	2.89661e-18	0.361998	0.757	0.785	1.61445e-13	0
PCBP1	3.39033e-18	0.287684	0.84	0.915	1.88963e-13	0
MXD1	4.01601e-18	0.49428	0.751	0.767	2.23836e-13	0
SRSF3	4.32366e-18	0.256414	0.837	0.936	2.40984e-13	0
MYD88	1.18953e-17	0.300498	0.748	0.828	6.62997e-13	0
LILRA2	1.54122e-17	0.68911	0.61	0.443	8.59012e-13	0
MTRNR2L8	2.14492e-17	0.304989	0.882	0.93	1.19549e-12	0
H2AFY	2.64512e-17	0.336739	0.789	0.898	1.47428e-12	0
CD36	3.764e-17	0.675577	0.518	0.328	2.0979e-12	0
ZFAND5	6.26502e-17	0.405784	0.741	0.824	3.49187e-12	0
TNFAIP2	7.39906e-17	0.449309	0.725	0.742	4.12394e-12	0
HM13	7.68051e-17	0.300702	0.744	0.862	4.28081e-12	0
ETS2	8.86744e-17	0.569161	0.674	0.657	4.94236e-12	0
FAM65B	1.33183e-16	0.695658	0.444	0.243	7.42307e-12	0
THEMIS2	1.34353e-16	0.285843	0.78	0.866	7.48831e-12	0
EVI2B	1.45808e-16	0.410709	0.722	0.773	8.12674e-12	0
WTAP	1.57878e-16	0.360299	0.834	0.913	8.79948e-12	0
IVNS1ABP	1.74178e-16	0.480859	0.725	0.766	9.708e-12	0
RASGEF1B	2.96744e-16	0.336265	0.824	0.88	1.65393e-11	0
LYST	3.73064e-16	0.594057	0.636	0.502	2.07931e-11	0
LILRA1	4.34835e-16	0.661142	0.639	0.505	2.4236e-11	0
FTH1P16	4.65167e-16	0.430187	0.69	0.651	2.59266e-11	0
G0S2	6.12865e-16	0.896972	0.514	0.405	3.41586e-11	0
MYO1F	6.89675e-16	0.294703	0.76	0.871	3.84397e-11	0
LTA4H	7.08227e-16	0.414733	0.674	0.692	3.94737e-11	0
C1orf56	9.30874e-16	0.385417	0.744	0.719	5.18832e-11	0
C1orf162	9.90287e-16	0.293245	0.776	0.848	5.51946e-11	0
LITAF	1.00239e-15	0.281148	0.764	0.902	5.58695e-11	0
XXbac-BPG252P9.10	1.00426e-15	0.602052	0.597	0.513	5.59737e-11	0
FGD2	1.00842e-15	0.32085	0.834	0.891	5.62053e-11	0
TLR2	1.3757e-15	0.415189	0.719	0.742	7.6676e-11	0
MEFV	1.70852e-15	0.570434	0.335	0.149	9.5226e-11	0
ACSL1	2.47956e-15	0.547717	0.719	0.67	1.382e-10	0
RP11-638I2.10	3.78659e-15	0.675303	0.486	0.329	2.11049e-10	0
IER3	4.23829e-15	0.562589	0.668	0.639	2.36225e-10	0
APOBEC3B	6.60208e-15	0.51665	0.415	0.206	3.67973e-10	0
ARHGAP26	1.16957e-14	0.61159	0.597	0.5	6.51872e-10	0
AKAP13	1.29639e-14	0.360947	0.78	0.861	7.22557e-10	0
TSC22D3	1.35802e-14	0.378798	0.716	0.789	7.56906e-10	0
RP11-466H18.1	1.49832e-14	0.257631	0.725	0.834	8.35105e-10	0
RP11-345J4.6	2.2351e-14	0.440291	0.629	0.592	1.24575e-09	0
RNF213	3.24094e-14	0.343803	0.818	0.866	1.80637e-09	0
SRRM2	4.23162e-14	0.306862	0.821	0.912	2.35854e-09	0
BIRC3	4.56702e-14	0.706774	0.518	0.392	2.54547e-09	0
CD48	4.61186e-14	0.427082	0.629	0.621	2.57047e-09	0
LILRA3	5.10377e-14	0.63941	0.645	0.544	2.84464e-09	0
FTH1P2	6.10979e-14	0.407574	0.661	0.653	3.40535e-09	0
PLAC8	6.2713e-14	0.717742	0.393	0.227	3.49537e-09	0
CTC-250I14.6	6.92878e-14	0.416225	0.684	0.677	3.86182e-09	0
FTH1P3	1.09591e-13	0.461946	0.546	0.437	6.10818e-09	0
C19orf38	1.24239e-13	0.717742	0.39	0.238	6.9246e-09	0
DENND5A	1.2859e-13	0.534795	0.658	0.672	7.16709e-09	0
SQSTM1	1.76185e-13	0.367009	0.735	0.823	9.81984e-09	0
FTH1P12	1.83986e-13	0.406381	0.61	0.542	1.02547e-08	0
FCAR	2.28807e-13	0.823283	0.358	0.211	1.27528e-08	0
NUMB	2.43444e-13	0.414761	0.671	0.727	1.35686e-08	0
CTD-2192J16.15	2.62743e-13	0.261119	0.722	0.741	1.46442e-08	0
AP1S2	2.75972e-13	0.27405	0.735	0.829	1.53816e-08	0
SAMSN1	2.78629e-13	0.466317	0.69	0.642	1.55297e-08	0
RP11-1100L3.8	2.95071e-13	0.533081	0.652	0.64	1.64461e-08	0
CD97	7.19714e-13	0.35321	0.716	0.788	4.0114e-08	0
LRRC25	9.18839e-13	0.37434	0.661	0.711	5.12124e-08	0
AHNAK	1.20174e-12	0.256992	0.824	0.916	6.69803e-08	0
SMG1	1.66662e-12	0.317982	0.843	0.911	9.28907e-08	0
PLEK	1.86683e-12	0.267135	0.757	0.88	1.0405e-07	0
BTG1	2.407e-12	0.4701	0.674	0.723	1.34157e-07	0
TNFRSF14	3.32047e-12	0.42293	0.668	0.736	1.8507e-07	0
TLE3	4.58318e-12	0.502974	0.674	0.716	2.55448e-07	0
NOTCH2	6.12686e-12	0.363171	0.789	0.812	3.41487e-07	0
CASP1	8.38883e-12	0.407311	0.617	0.634	4.6756e-07	0
ECE1	9.0419e-12	0.559004	0.284	0.136	5.03959e-07	0
RPS3AP26	1.12098e-11	0.285443	0.677	0.689	6.24787e-07	0
RP11-34P13.13	1.30986e-11	0.50354	0.649	0.666	7.30061e-07	0
CCNL1	1.33504e-11	0.36088	0.706	0.794	7.44097e-07	0
KYNU	1.3498e-11	0.390571	0.722	0.718	7.52324e-07	0
PRRC2C	1.38904e-11	0.286335	0.869	0.935	7.74197e-07	0
P2RX1	1.47742e-11	0.543458	0.294	0.141	8.23454e-07	0
DDX3X	1.75876e-11	0.340607	0.866	0.914	9.80261e-07	0
CTB-13H5.1	1.8598e-11	0.29151	0.668	0.686	1.03658e-06	0
CXCR4	1.90698e-11	0.375329	0.7	0.754	1.06287e-06	0
TBXAS1	2.79664e-11	0.335502	0.671	0.755	1.55873e-06	0
LDLR	2.98175e-11	0.576825	0.323	0.166	1.66191e-06	0
DDIT4	3.69446e-11	0.448326	0.633	0.643	2.05915e-06	0
ADM	3.72091e-11	0.71621	0.454	0.344	2.07389e-06	0
LILRB1	4.24278e-11	0.346475	0.789	0.82	2.36476e-06	0
JMJD1C	4.55929e-11	0.415489	0.732	0.801	2.54117e-06	0
HK3	4.77196e-11	0.371477	0.636	0.633	2.6597e-06	0
DOCK5	4.95952e-11	0.369276	0.732	0.801	2.76424e-06	0
KMT2E	5.29753e-11	0.329917	0.786	0.854	2.95263e-06	0
SIRPB1	7.68925e-11	0.588969	0.61	0.588	4.28568e-06	0
CYTIP	8.18716e-11	0.360679	0.661	0.729	4.5632e-06	0
RNASET2	8.20562e-11	0.275764	0.716	0.814	4.57348e-06	0
ATP2B1	8.45731e-11	0.584951	0.588	0.579	4.71377e-06	0
NBPF10	8.73652e-11	0.402255	0.776	0.81	4.86939e-06	0
RP1-257A7.5	1.40557e-10	0.557262	0.565	0.54	7.83406e-06	0
JUND	2.46383e-10	0.363734	0.744	0.77	1.37324e-05	0
GLIPR1	2.95946e-10	0.365711	0.661	0.703	1.64948e-05	0
SLA	3.4626e-10	0.459849	0.617	0.649	1.92991e-05	0
KDM6B	3.48893e-10	0.554115	0.69	0.642	1.94459e-05	0
RIPK2	3.77232e-10	0.415774	0.661	0.718	2.10254e-05	0
NBPF14	4.21627e-10	0.445826	0.674	0.695	2.34998e-05	0
IL10RA	4.26388e-10	0.250118	0.754	0.852	2.37652e-05	0
ARAP1	5.26964e-10	0.409112	0.751	0.803	2.93708e-05	0
MYO1G	5.44801e-10	0.475061	0.581	0.498	3.0365e-05	0
CTB-61M7.2	6.80182e-10	0.715041	0.326	0.206	3.79106e-05	0
EREG	7.15057e-10	0.709299	0.367	0.242	3.98544e-05	0
MIR24-2	7.30664e-10	0.371694	0.703	0.742	4.07243e-05	0
SOCS3	8.45453e-10	0.439595	0.633	0.692	4.71222e-05	0
LPCAT1	9.08561e-10	0.689824	0.355	0.223	5.06395e-05	0
RILPL2	9.09724e-10	0.463632	0.578	0.586	5.07044e-05	0
ARHGEF1	1.11527e-09	0.409508	0.61	0.633	6.21607e-05	0
PTK2B	1.44508e-09	0.407175	0.677	0.705	8.0543e-05	0
IL8	1.5222e-09	0.571205	0.553	0.551	8.48413e-05	0
MAP2K3	1.79676e-09	0.466607	0.607	0.632	0.000100144	0
ICAM3	1.88778e-09	0.583642	0.374	0.247	0.000105217	0
PILRB	1.90684e-09	0.327608	0.665	0.722	0.00010628	0
RN7SL368P	1.91889e-09	0.703957	0.351	0.232	0.000106951	0
PFKFB3	3.01868e-09	0.389295	0.652	0.667	0.000168249	0
IGSF6	3.32762e-09	0.251087	0.645	0.753	0.000185468	0
hsa-mir-6723	3.34251e-09	0.288744	0.792	0.874	0.000186298	0
PHACTR1	4.06741e-09	0.566135	0.524	0.442	0.000226701	0
DUSP2	4.52549e-09	0.507211	0.588	0.541	0.000252232	0
GK	4.70654e-09	0.426446	0.716	0.772	0.000262324	0
EZR	4.90367e-09	0.292788	0.696	0.807	0.000273311	0
CLK1	5.95248e-09	0.268525	0.687	0.825	0.000331767	0
AMICA1	6.1068e-09	0.327207	0.629	0.624	0.000340368	0
AOAH	6.53341e-09	0.273925	0.629	0.714	0.000364146	0
ICAM1	1.02151e-08	0.285578	0.642	0.781	0.000569349	0
SH3BP2	1.02666e-08	0.352942	0.693	0.737	0.00057222	0
CCRN4L	1.12466e-08	0.37754	0.252	0.131	0.000626839	0
TET2	1.19225e-08	0.388459	0.677	0.718	0.000664511	0
HNRNPU	1.4269e-08	0.291388	0.725	0.832	0.000795297	0
RP11-701P16.2	1.89849e-08	0.527816	0.326	0.205	0.00105814	0
C19orf59	2.36975e-08	0.575525	0.383	0.263	0.0013208	0
MTRNR2L1	2.67314e-08	0.340192	0.783	0.817	0.0014899	0
CTD-2328D6.1	2.79691e-08	0.357078	0.645	0.697	0.00155888	0
RP11-5L12.1	3.00952e-08	0.571363	0.438	0.374	0.00167738	0
GADD45B	3.3197e-08	0.328116	0.7	0.771	0.00185027	0
RASSF3	3.36603e-08	0.41991	0.62	0.678	0.00187609	0
ANPEP	3.45248e-08	0.388242	0.617	0.648	0.00192427	0
CHST15	4.03628e-08	0.515145	0.428	0.321	0.00224966	0
BNIP3L	4.27751e-08	0.324807	0.645	0.755	0.00238411	0
USP3	4.45793e-08	0.389975	0.604	0.648	0.00248467	0
PNRC1	4.95217e-08	0.434322	0.665	0.681	0.00276014	0
ATG16L2	5.09574e-08	0.513639	0.562	0.549	0.00284016	0
FAM157C	5.86328e-08	0.502646	0.514	0.451	0.00326796	0
IRAK3	6.15704e-08	0.492506	0.559	0.496	0.00343169	0
LIMD2	6.51455e-08	0.352854	0.61	0.682	0.00363095	0
PTEN	7.24963e-08	0.286727	0.658	0.8	0.00404065	0
PDE4B	7.95735e-08	0.423648	0.607	0.578	0.00443511	0
TNFRSF1A	8.78187e-08	0.294493	0.658	0.78	0.00489466	0
ACADVL	1.09511e-07	0.324612	0.652	0.758	0.00610373	0
GABBR1	1.34723e-07	0.476942	0.294	0.18	0.0075089	0
NFKBID	1.49765e-07	0.482995	0.575	0.562	0.00834732	0
MX2	1.79948e-07	0.454409	0.556	0.499	0.0100296	0
SLC43A2	1.83372e-07	0.391852	0.652	0.67	0.0102204	0
CLEC12A	1.94143e-07	0.468042	0.47	0.395	0.0108208	0
RNA5SP151	1.95498e-07	0.711586	0.319	0.228	0.0108963	0
RP11-169K16.8	2.1269e-07	0.284323	0.575	0.617	0.0118545	0
MTSS1	2.459e-07	0.557865	0.447	0.381	0.0137055	0
NR4A2	3.03337e-07	0.271741	0.709	0.799	0.0169068	0
RNU2-2P	3.17374e-07	0.31655	0.629	0.719	0.0176891	0
PRAM1	4.21268e-07	0.439842	0.447	0.377	0.0234798	0
HBEGF	5.10489e-07	0.374235	0.578	0.617	0.0284526	0
DPYD	5.98827e-07	0.268282	0.652	0.761	0.0333762	0
PPIF	7.49773e-07	0.439641	0.591	0.677	0.0417894	0
MOB3A	7.51622e-07	0.391522	0.591	0.647	0.0418924	0
RAB24	8.18423e-07	0.405053	0.534	0.529	0.0456156	0
FAM49A	8.77638e-07	0.399864	0.601	0.596	0.048916	0
NBPF16	9.76016e-07	0.325857	0.626	0.627	0.0543993	0
C15orf39	1.0681e-06	0.443027	0.524	0.474	0.0595314	0
CAST	1.12483e-06	0.312764	0.652	0.731	0.0626937	0
RP11-325F22.2	1.17059e-06	0.573455	0.364	0.275	0.0652441	0
NCF1	1.17463e-06	0.35009	0.613	0.662	0.0654693	0
RPS4Y1	1.33245e-06	0.453159	0.355	0.265	0.0742654	0
EAF1	1.5489e-06	0.527418	0.498	0.514	0.0863296	0
MAPK7	1.6022e-06	0.584006	0.294	0.208	0.0893004	0
PRELID1P1	1.64373e-06	0.303713	0.45	0.411	0.0916147	0
IRF1	1.67912e-06	0.353883	0.594	0.611	0.0935875	0
DMXL2	1.84623e-06	0.382521	0.623	0.608	0.102902	0
CARD16	1.97929e-06	0.337038	0.585	0.637	0.110318	0
PTGS2	2.02881e-06	0.537499	0.326	0.223	0.113078	0
DOCK2	2.06239e-06	0.298764	0.661	0.779	0.114949	0
RP11-802E16.3	2.79465e-06	0.427964	0.543	0.549	0.155763	0
EFHD2	2.9969e-06	0.41969	0.594	0.627	0.167035	0
RP11-347C12.1	3.11342e-06	0.349204	0.62	0.616	0.17353	0
DDX60L	3.14092e-06	0.537187	0.428	0.345	0.175062	0
CTB-50E14.5	3.30007e-06	0.412417	0.492	0.503	0.183933	0
ARAP1-AS1	3.40478e-06	0.454275	0.543	0.607	0.189769	0
IL1RN	3.73051e-06	0.456254	0.546	0.596	0.207924	0
HCG4P5	4.21615e-06	0.254987	0.53	0.479	0.234991	0
GCH1	4.27439e-06	0.442262	0.323	0.223	0.238237	0
EIF1B	5.6835e-06	0.356499	0.629	0.72	0.316775	0
CCRL2	5.98316e-06	0.561696	0.403	0.358	0.333477	0
ZNF385A	6.11636e-06	0.359046	0.594	0.618	0.340902	0
LINC00936	6.36703e-06	0.560907	0.374	0.31	0.354873	0
PTGER2	6.6691e-06	0.592157	0.304	0.227	0.371709	0
Z82188.1	6.9015e-06	0.48417	0.399	0.338	0.384662	0
AMPD2	9.04423e-06	0.455924	0.514	0.537	0.504089	0
TANK	1.14036e-05	0.378445	0.581	0.625	0.635593	0
EMR2	1.33281e-05	0.41718	0.61	0.692	0.742856	0
TOM1	1.41578e-05	0.365828	0.588	0.653	0.789101	0
RPS2P46	1.42273e-05	0.288194	0.537	0.548	0.792974	0
RXRA	2.15682e-05	0.525078	0.479	0.461	1	0
RP11-356I2.4	2.2151e-05	0.490282	0.393	0.335	1	0
ZCCHC6	2.93374e-05	0.475802	0.511	0.534	1	0
GBP2	3.34252e-05	0.276894	0.626	0.7	1	0
AC138035.2	3.79346e-05	0.437858	0.514	0.513	1	0
SH2D3C	3.85086e-05	0.460108	0.3	0.216	1	0
MYO9B	3.97248e-05	0.408964	0.594	0.661	1	0
BACH1	4.39113e-05	0.402997	0.556	0.598	1	0
YBX1	4.99922e-05	0.251415	0.684	0.83	1	0
CHD1	5.04126e-05	0.392065	0.626	0.658	1	0
TRA2B	5.33089e-05	0.297771	0.636	0.738	1	0
EGR1	6.09295e-05	0.348395	0.62	0.704	1	0
PDCD6IP	8.60711e-05	0.25478	0.629	0.768	1	0
RBKS	8.73765e-05	0.523991	0.275	0.204	1	0
CD300A	9.27705e-05	0.27247	0.578	0.666	1	0
SELL	9.33006e-05	0.368457	0.393	0.323	1	0
CSRNP1	9.93199e-05	0.330289	0.578	0.676	1	0
AGTRAP	0.000102879	0.324397	0.562	0.623	1	0
RP11-349A22.5	0.000105867	0.32693	0.588	0.659	1	0
MS4A7	0.000107476	0.27269	0.601	0.698	1	0
TNIP1	0.000108191	0.507002	0.537	0.548	1	0
NEDD9	0.000124816	0.481646	0.45	0.432	1	0
PIM3	0.000146473	0.484912	0.463	0.434	1	0
GBP1	0.000147644	0.352266	0.537	0.553	1	0
PARP14	0.000152727	0.302018	0.674	0.793	1	0
TBC1D8	0.000153975	0.419954	0.284	0.209	1	0
GPSM3	0.000162154	0.257502	0.658	0.771	1	0
CPD	0.000163016	0.494933	0.304	0.235	1	0
DPEP2	0.00016692	0.45242	0.268	0.195	1	0
MAFB	0.000182417	0.391177	0.53	0.544	1	0
CTB-63M22.1	0.000192557	0.269434	0.565	0.626	1	0
POU2F2	0.000196156	0.387782	0.45	0.391	1	0
GRINA	0.000202585	0.307122	0.684	0.762	1	0
STX11	0.000214468	0.394923	0.473	0.48	1	0
DNAJB1	0.000232886	0.269144	0.661	0.816	1	0
CDH23	0.000236867	0.409398	0.319	0.251	1	0
MCTP1	0.000239481	0.31574	0.562	0.604	1	0
ZC3H12A	0.000241857	0.484791	0.415	0.4	1	0
CALCOCO2	0.000251535	0.315356	0.534	0.573	1	0
LINC01001	0.000255746	0.37159	0.521	0.523	1	0
OSM	0.00027219	0.513688	0.374	0.343	1	0
IRF7	0.000288093	0.359038	0.502	0.529	1	0
NLRP1	0.000310389	0.389784	0.428	0.388	1	0
VEGFA	0.000333633	0.51148	0.399	0.357	1	0
ZEB2-AS1	0.000366167	0.463741	0.335	0.29	1	0
RELT	0.000389227	0.33811	0.562	0.621	1	0
RNF144B	0.000392104	0.341984	0.553	0.658	1	0
CTD-2369P2.8	0.000401162	0.36868	0.323	0.26	1	0
NADK	0.000442196	0.344118	0.508	0.529	1	0
KLF10	0.000447847	0.300192	0.55	0.594	1	0
CXCL2	0.000486781	0.51766	0.425	0.446	1	0
CLEC4E	0.000491937	0.458363	0.387	0.362	1	0
CAPN2	0.000507189	0.294012	0.585	0.61	1	0
TLE4	0.000522943	0.432483	0.313	0.254	1	0
NBEAL2	0.000568268	0.347795	0.428	0.383	1	0
IL6R	0.00062224	0.424185	0.428	0.406	1	0
TRIM22	0.000675751	0.265304	0.594	0.682	1	0
CTB-89H12.4	0.000704264	0.33738	0.575	0.621	1	0
FAM157B	0.000801347	0.456234	0.332	0.289	1	0
IL1RAP	0.000817834	0.504833	0.364	0.328	1	0
ODF3B	0.000911905	0.391928	0.588	0.633	1	0
PIK3R5	0.000955763	0.30204	0.575	0.652	1	0
SSH2	0.000960159	0.335006	0.537	0.549	1	0
C16orf54	0.000993241	0.389538	0.441	0.458	1	0
CDC42EP3	0.00102989	0.404024	0.297	0.237	1	0
NCF1C	0.00108047	0.314933	0.578	0.63	1	0
HPSE	0.0011596	0.443373	0.316	0.261	1	0
NDRG1	0.00119049	0.490165	0.422	0.444	1	0
LILRP1	0.00131733	0.262801	0.476	0.492	1	0
FTH1P4	0.00149642	0.311736	0.454	0.429	1	0
PTP4A2	0.00149732	0.275003	0.585	0.682	1	0
PSEN1	0.00163727	0.29125	0.575	0.696	1	0
POR	0.0016523	0.422652	0.403	0.4	1	0
ICAM2	0.00173686	0.416706	0.364	0.333	1	0
RNF19B	0.00178002	0.396292	0.319	0.258	1	0
CX3CR1	0.0018534	0.375344	0.268	0.215	1	0
PPP1R15B	0.00185639	0.302646	0.569	0.679	1	0
IRAK1	0.00210226	0.459186	0.46	0.515	1	0
FAM107B	0.00232427	0.438688	0.304	0.258	1	0
CSTA	0.00244796	0.326554	0.45	0.517	1	0
ARHGEF2	0.00252095	0.359505	0.486	0.573	1	0
HPCAL1	0.00286833	0.459667	0.374	0.367	1	0
IQSEC1	0.00293898	0.390951	0.55	0.579	1	0
FTH1P5	0.00296671	0.260269	0.348	0.335	1	0
RP4-669L17.10	0.00326208	0.351715	0.508	0.541	1	0
SNN	0.00366547	0.388276	0.323	0.278	1	0
CHMP1B	0.00366901	0.263729	0.581	0.701	1	0
TES	0.00371759	0.319725	0.502	0.555	1	0
HCAR2	0.0038166	0.453262	0.326	0.299	1	0
KCNAB2	0.00412475	0.280387	0.604	0.714	1	0
IRAK2	0.00424594	0.404153	0.259	0.21	1	0
AC013394.2	0.005157	0.306387	0.534	0.664	1	0
SEMA6B	0.00538345	0.338249	0.291	0.241	1	0
PELI1	0.00563865	0.428588	0.377	0.373	1	0
GNG2	0.00606703	0.355112	0.326	0.299	1	0
CD93	0.00615193	0.411179	0.431	0.467	1	0
RP11-750H9.5	0.00669368	0.345575	0.431	0.475	1	0
PIK3AP1	0.00746254	0.389779	0.511	0.544	1	0
AKIRIN2	0.00751511	0.262766	0.514	0.624	1	0
TBC1D2	0.00790427	0.415622	0.431	0.469	1	0
PRKCB	0.00829829	0.366439	0.463	0.478	1	0
TRIM25	0.00889604	0.350274	0.486	0.555	1	0
RP11-261C10.3	0.00903651	0.311856	0.38	0.378	1	0
EMILIN2	0.00920855	0.367671	0.441	0.451	1	0
TAPSAR1	0.00925384	0.304533	0.54	0.596	1	0
THBD	0.00996783	0.38781	0.438	0.508	1	0
CLEC10A	1.5255e-93	1.36833	0.785	0.202	8.50251e-89	1
CD1C	2.03795e-93	1.49074	0.588	0.079	1.13587e-88	1
PLD4	9.34317e-66	1.07565	0.561	0.104	5.20751e-61	1
FCER1A	6.66883e-65	1.18207	0.332	0.018	3.71694e-60	1
NAPSB	9.06495e-59	1.06469	0.796	0.271	5.05244e-54	1
SPIB	5.03423e-56	0.960127	0.308	0.023	2.80588e-51	1
CST7	9.73684e-50	1.0619	0.408	0.076	5.42692e-45	1
FLT3	2.88898e-49	0.74863	0.356	0.046	1.6102e-44	1
HLA-DQA1	4.11498e-49	0.593415	0.972	0.745	2.29352e-44	1
HLA-DQA2	9.81829e-48	0.660954	0.934	0.649	5.47232e-43	1
SLC38A1	5.12777e-46	0.83918	0.377	0.067	2.85801e-41	1
HLA-DPB2	5.16283e-45	0.688181	0.772	0.39	2.87756e-40	1
HLA-DOA	4.55609e-44	0.845271	0.723	0.336	2.53938e-39	1
AGPAT9	1.98537e-43	0.913753	0.505	0.133	1.10657e-38	1
GSN	2.14089e-41	0.478475	0.941	0.707	1.19325e-36	1
PPA1	1.22913e-40	0.667758	0.813	0.548	6.85071e-36	1
CD1E	6.87806e-39	0.953535	0.336	0.066	3.83356e-34	1
AMICA1	4.8619e-38	0.619112	0.896	0.553	2.70983e-33	1
HLA-DQB2	2.10623e-37	0.466676	0.972	0.794	1.17393e-32	1
AREG	1.23243e-36	0.910928	0.592	0.224	6.86908e-32	1
AXL	4.75232e-35	0.835488	0.619	0.286	2.64875e-30	1
HLA-DMB	1.378e-34	0.42729	0.948	0.762	7.68043e-30	1
HDAC9	7.74075e-34	0.72805	0.471	0.145	4.31438e-29	1
IRF4	8.35764e-34	0.672037	0.339	0.073	4.65821e-29	1
CNN2	1.0998e-33	0.535084	0.907	0.651	6.12985e-29	1
MAP4K1	1.69274e-33	0.761799	0.512	0.183	9.43468e-29	1
CIITA	9.71767e-33	0.485097	0.924	0.697	5.41624e-28	1
HLA-DPB1	9.04542e-32	0.30284	0.99	0.93	5.04156e-27	1
GPR183	3.10878e-30	0.513617	0.872	0.66	1.73271e-25	1
P2RY14	3.56243e-30	0.677324	0.301	0.064	1.98556e-25	1
IDO1	3.89093e-30	0.852467	0.367	0.094	2.16865e-25	1
TUBA1B	3.29821e-29	0.303953	0.969	0.845	1.83829e-24	1
PIP4K2A	7.92453e-29	0.434133	0.886	0.723	4.41682e-24	1
IL2RG	1.05638e-28	0.578848	0.768	0.507	5.88782e-24	1
ATP1B1	5.74986e-28	0.584138	0.647	0.335	3.20474e-23	1
GRASP	7.82202e-28	0.541271	0.533	0.205	4.35968e-23	1
SPINT2	2.68895e-27	0.516175	0.772	0.562	1.49871e-22	1
EEF1B2	3.87635e-27	0.331877	0.972	0.799	2.16052e-22	1
HLA-DQB1	4.30148e-27	0.312448	0.983	0.896	2.39747e-22	1
AC011558.5	4.49929e-27	0.533476	0.796	0.506	2.50772e-22	1
NR4A3	1.63877e-26	0.555936	0.803	0.53	9.13383e-22	1
TTYH2	4.49725e-26	0.641734	0.457	0.174	2.50659e-21	1
RPSAP58	6.85252e-26	0.318029	0.945	0.795	3.81932e-21	1
HLA-DPA1	8.36783e-26	0.254825	0.997	0.941	4.66389e-21	1
CCND2	9.21036e-26	0.631771	0.561	0.271	5.13349e-21	1
PHLDB3	3.46379e-25	0.508075	0.322	0.086	1.93058e-20	1
RGS1	4.12935e-25	0.550462	0.813	0.581	2.30153e-20	1
IL1R2	5.6327e-25	0.754605	0.294	0.074	3.13944e-20	1
NDRG2	7.02613e-25	0.749205	0.464	0.206	3.91608e-20	1
SLAMF7	7.8268e-25	0.649175	0.651	0.348	4.36235e-20	1
RP11-386G11.10	7.89144e-25	0.275548	0.958	0.837	4.39837e-20	1
EIF3L	9.67411e-25	0.35513	0.913	0.749	5.39196e-20	1
HERPUD1	1.53181e-23	0.368368	0.907	0.751	8.5377e-19	1
ENTPD1	2.54617e-23	0.517268	0.74	0.47	1.41913e-18	1
HMGN1	2.85317e-23	0.374889	0.844	0.661	1.59025e-18	1
PSME2P2	4.63849e-23	0.381252	0.834	0.618	2.58531e-18	1
PAK1	4.91633e-23	0.448689	0.775	0.579	2.74016e-18	1
TUBA1A	9.33368e-23	0.388298	0.875	0.731	5.20222e-18	1
XXbac-BPG181M17.5	2.2666e-22	0.429088	0.72	0.473	1.26331e-17	1
HLA-DMA	4.51234e-22	0.255019	0.979	0.886	2.515e-17	1
HNRNPA1P48	6.6681e-22	0.272712	0.948	0.788	3.71653e-17	1
CYP2S1	1.18378e-21	0.626715	0.561	0.321	6.59789e-17	1
RPS5	1.447e-21	0.251144	0.99	0.874	8.06498e-17	1
ADAM19	1.78258e-21	0.584182	0.571	0.296	9.93536e-17	1
RUNX2	1.95528e-21	0.461304	0.308	0.094	1.08979e-16	1
ARL4C	1.22808e-20	0.562277	0.516	0.252	6.8448e-16	1
RPS4Y1	2.7677e-20	0.640983	0.519	0.223	1.54261e-15	1
CLIC2	6.31087e-20	0.623975	0.436	0.202	3.51743e-15	1
CXCR4	6.94066e-20	0.402192	0.893	0.701	3.86845e-15	1
NME1-NME2	7.43891e-20	0.279811	0.907	0.767	4.14615e-15	1
RP11-274E7.2	4.1682e-19	0.340513	0.813	0.596	2.32319e-14	1
EIF3M	1.91601e-18	0.354758	0.817	0.653	1.06791e-13	1
ATP5A1	2.35257e-18	0.291636	0.841	0.712	1.31123e-13	1
EEF1B2P3	2.78456e-18	0.330491	0.779	0.58	1.552e-13	1
C17orf49	2.89112e-18	0.374628	0.782	0.591	1.61139e-13	1
INSIG1	3.2018e-18	0.514431	0.713	0.493	1.78455e-13	1
GABARAPL2	3.44762e-18	0.419254	0.734	0.583	1.92156e-13	1
CTC-308K20.3	5.51527e-18	0.298547	0.374	0.161	3.07399e-13	1
IFITM1	7.75388e-18	0.580578	0.498	0.219	4.3217e-13	1
UBE2E2	1.26497e-17	0.495328	0.657	0.457	7.05042e-13	1
CSF2RA	2.01217e-17	0.309586	0.875	0.728	1.1215e-12	1
STK17B	5.67918e-17	0.287983	0.952	0.816	3.16535e-12	1
DEXI	1.09559e-16	0.357936	0.384	0.165	6.10641e-12	1
FGL2	1.28079e-16	0.325213	0.924	0.778	7.13864e-12	1
FKBP5	2.25149e-16	0.402544	0.73	0.564	1.25489e-11	1
RPL3P4	2.26802e-16	0.258921	0.872	0.743	1.2641e-11	1
MTHFD2	2.54161e-16	0.366717	0.747	0.602	1.41659e-11	1
RPS21	2.63648e-16	0.2518	0.917	0.784	1.46947e-11	1
SSR1	3.31373e-16	0.298188	0.862	0.729	1.84694e-11	1
C10orf128	3.61509e-16	0.589601	0.481	0.282	2.01491e-11	1
MAP3K8	3.63861e-16	0.409365	0.754	0.581	2.02802e-11	1
HLA-DQB1-AS1	3.64731e-16	0.391799	0.63	0.407	2.03286e-11	1
CXCL9	6.32707e-16	0.568576	0.266	0.092	3.52646e-11	1
AREGB	1.10826e-15	0.341274	0.253	0.08	6.17702e-11	1
YIF1B	1.90976e-15	0.39954	0.654	0.528	1.06443e-10	1
RP11-425L10.1	1.9293e-15	0.25919	0.848	0.713	1.07532e-10	1
ISG20	2.20641e-15	0.500168	0.495	0.232	1.22977e-10	1
GBP4	2.79134e-15	0.486267	0.571	0.335	1.55578e-10	1
CDC42SE2	4.90661e-15	0.324831	0.824	0.642	2.73475e-10	1
SUB1	5.16644e-15	0.25444	0.858	0.756	2.87957e-10	1
RPS3AP26	6.89856e-15	0.285981	0.827	0.649	3.84498e-10	1
REL	7.9493e-15	0.332752	0.844	0.678	4.43062e-10	1
PLAC8	9.77835e-15	0.476883	0.471	0.21	5.45006e-10	1
ALDH2	9.81362e-15	0.323022	0.813	0.663	5.46972e-10	1
EDEM1	1.12336e-14	0.347985	0.772	0.597	6.26114e-10	1
DBI	1.24611e-14	0.259911	0.806	0.69	6.9453e-10	1
AKAP2	1.38349e-14	0.473429	0.467	0.255	7.71102e-10	1
SNHG5	2.52527e-14	0.332294	0.81	0.655	1.40748e-09	1
UVRAG	2.65911e-14	0.471443	0.561	0.369	1.48208e-09	1
CBX6	2.71523e-14	0.265485	0.82	0.653	1.51336e-09	1
MCOLN2	3.63036e-14	0.529291	0.37	0.184	2.02342e-09	1
LGALS2	3.94268e-14	0.519775	0.512	0.29	2.19749e-09	1
CD1D	4.06989e-14	0.478902	0.536	0.325	2.26839e-09	1
SEL1L3	4.6566e-14	0.47757	0.308	0.131	2.5954e-09	1
DCXR	5.13283e-14	0.406347	0.647	0.483	2.86083e-09	1
RP11-234A1.1	7.80581e-14	0.274255	0.799	0.65	4.35065e-09	1
ELMO1	7.94313e-14	0.342398	0.744	0.577	4.42719e-09	1
BCL11A	8.50343e-14	0.483919	0.498	0.3	4.73947e-09	1
HIVEP2	1.28607e-13	0.395246	0.398	0.206	7.16805e-09	1
ABI3	1.52983e-13	0.392261	0.647	0.484	8.52664e-09	1
LIMD2	1.83574e-13	0.308931	0.824	0.624	1.02317e-08	1
TMEM109	2.30791e-13	0.344782	0.706	0.575	1.28634e-08	1
PRCP	2.74934e-13	0.345478	0.689	0.566	1.53237e-08	1
FAM26F	2.75614e-13	0.376357	0.727	0.592	1.53616e-08	1
CTB-13H5.1	3.28366e-13	0.269354	0.806	0.649	1.83018e-08	1
RP11-864N7.2	3.48887e-13	0.273982	0.775	0.607	1.94456e-08	1
ETV3	3.68401e-13	0.469508	0.533	0.33	2.05332e-08	1
RP1-257A7.5	6.14961e-13	0.419486	0.696	0.506	3.42755e-08	1
RP4-765C7.2	7.27005e-13	0.322567	0.263	0.101	4.05203e-08	1
TES	8.39295e-13	0.366953	0.699	0.501	4.67789e-08	1
RGS10	1.2644e-12	0.258027	0.813	0.693	7.04728e-08	1
CFP	1.55764e-12	0.42407	0.73	0.422	8.68163e-08	1
CD72	1.8628e-12	0.461362	0.471	0.267	1.03825e-07	1
STAT1	1.98785e-12	0.305323	0.83	0.729	1.10795e-07	1
AHR	2.37475e-12	0.378849	0.685	0.521	1.32359e-07	1
RHOF	2.62062e-12	0.513374	0.433	0.252	1.46063e-07	1
LSP1	2.67613e-12	0.276932	0.952	0.759	1.49157e-07	1
LPXN	3.44634e-12	0.312034	0.744	0.623	1.92085e-07	1
ACAA1	3.87667e-12	0.325733	0.713	0.589	2.1607e-07	1
NDUFS7	4.10404e-12	0.250466	0.775	0.665	2.28742e-07	1
CPVL	6.37534e-12	0.285982	0.851	0.71	3.55336e-07	1
TRAF3IP3	6.9247e-12	0.415762	0.474	0.271	3.85955e-07	1
SELL	7.87705e-12	0.464412	0.505	0.295	4.39035e-07	1
APEX1	9.46829e-12	0.312551	0.661	0.551	5.27725e-07	1
MAT2A	9.59868e-12	0.254949	0.865	0.755	5.34992e-07	1
PRMT10	9.95794e-12	0.453862	0.522	0.351	5.55016e-07	1
AC022431.1	1.24612e-11	0.292291	0.664	0.506	6.94539e-07	1
SLC8A1-AS1	1.24759e-11	0.397378	0.464	0.283	6.95357e-07	1
ARHGAP15	1.34353e-11	0.389651	0.561	0.375	7.48831e-07	1
RASSF2	1.63201e-11	0.341625	0.654	0.475	9.09616e-07	1
EIF3CL	1.70104e-11	0.251752	0.775	0.674	9.48089e-07	1
CASS4	1.87268e-11	0.413782	0.325	0.162	1.04376e-06	1
AIM1	1.96978e-11	0.383876	0.564	0.389	1.09788e-06	1
DUSP4	2.03293e-11	0.368767	0.287	0.125	1.13307e-06	1
STK4	2.28334e-11	0.331639	0.758	0.623	1.27264e-06	1
CERKL	2.584e-11	0.33443	0.599	0.428	1.44022e-06	1
JAK3	3.39901e-11	0.360673	0.623	0.457	1.89447e-06	1
ITGA4	3.49677e-11	0.339382	0.651	0.482	1.94896e-06	1
SATB1	4.00026e-11	0.357899	0.471	0.273	2.22959e-06	1
KDM6B	4.56406e-11	0.286071	0.785	0.618	2.54382e-06	1
IGFLR1	5.29553e-11	0.296802	0.682	0.576	2.95152e-06	1
PHACTR1	5.49075e-11	0.352418	0.623	0.417	3.06032e-06	1
MICAL1	6.30156e-11	0.320362	0.685	0.517	3.51224e-06	1
PTGER4	6.62125e-11	0.379914	0.616	0.488	3.69042e-06	1
UGCG	7.62111e-11	0.345813	0.488	0.297	4.2477e-06	1
CTD-2514K5.4	8.48925e-11	0.408106	0.263	0.116	4.73157e-06	1
GPR35	1.18286e-10	0.453987	0.298	0.142	6.59277e-06	1
CD52	1.65464e-10	0.348579	0.758	0.507	9.22233e-06	1
DUSP2	1.6909e-10	0.348956	0.716	0.508	9.42439e-06	1
NFKBID	1.89071e-10	0.339812	0.709	0.527	1.05381e-05	1
MEF2C	2.09142e-10	0.338675	0.64	0.472	1.16567e-05	1
FDFT1	2.17108e-10	0.332379	0.657	0.513	1.21008e-05	1
RIN3	2.25144e-10	0.260097	0.789	0.649	1.25486e-05	1
MALT1	2.31577e-10	0.349856	0.336	0.172	1.29072e-05	1
CAT	2.513e-10	0.310423	0.654	0.535	1.40064e-05	1
HMGN3	2.87976e-10	0.297326	0.651	0.525	1.60506e-05	1
RHOC	3.07141e-10	0.318214	0.692	0.557	1.71188e-05	1
ZNF331	3.2942e-10	0.338088	0.682	0.553	1.83605e-05	1
CUL1	3.38724e-10	0.371866	0.609	0.451	1.88791e-05	1
STAT4	3.61107e-10	0.348294	0.266	0.117	2.01266e-05	1
GAPT	4.86905e-10	0.390189	0.256	0.112	2.71381e-05	1
GTPBP1	4.97968e-10	0.313414	0.578	0.388	2.77548e-05	1
CHD1	6.92447e-10	0.277885	0.754	0.623	3.85942e-05	1
PTPN1	7.54696e-10	0.271919	0.727	0.602	4.20637e-05	1
CTB-63M22.1	8.21948e-10	0.273013	0.737	0.579	4.58121e-05	1
ASGR2	1.10787e-09	0.300644	0.277	0.122	6.17481e-05	1
PTMAP2	1.14844e-09	0.27481	0.633	0.478	6.40096e-05	1
RASSF5	1.23905e-09	0.359987	0.578	0.403	6.90599e-05	1
ANXA6	1.28535e-09	0.372184	0.54	0.39	7.16405e-05	1
BIRC3	1.3301e-09	0.348075	0.588	0.376	7.41347e-05	1
MIR29B1	1.80848e-09	0.293409	0.585	0.389	0.000100798	1
ARF3	1.82331e-09	0.299437	0.696	0.575	0.000101624	1
MKL1	1.91553e-09	0.268603	0.737	0.592	0.000106764	1
SCML1	2.09438e-09	0.343066	0.294	0.151	0.000116732	1
ANKRD44	2.70489e-09	0.285432	0.689	0.54	0.00015076	1
UTRN	3.34327e-09	0.283129	0.716	0.54	0.000186341	1
ACPP	3.77301e-09	0.411092	0.277	0.141	0.000210292	1
NUTM2A-AS1	4.3302e-09	0.337431	0.543	0.374	0.000241348	1
TMEM120B	4.60081e-09	0.254	0.322	0.17	0.000256431	1
CSRNP1	5.0968e-09	0.258211	0.761	0.625	0.000284075	1
PEBP1	5.11034e-09	0.271147	0.619	0.527	0.00028483	1
LINC00152	5.54934e-09	0.319698	0.612	0.448	0.000309298	1
ITGB2-AS1	5.67284e-09	0.297749	0.595	0.458	0.000316181	1
RGS18	7.33517e-09	0.360038	0.401	0.239	0.000408833	1
BTN2A2	7.46092e-09	0.420448	0.332	0.19	0.000415842	1
RAB4B	7.88494e-09	0.342369	0.554	0.423	0.000439475	1
ELOVL5	8.57992e-09	0.295887	0.64	0.546	0.00047821	1
AC009950.2	1.08757e-08	0.32503	0.415	0.257	0.000606168	1
SLC8A1	1.20114e-08	0.255716	0.761	0.643	0.000669468	1
NFKB1	1.31114e-08	0.349516	0.578	0.436	0.000730779	1
CD300LB	1.77156e-08	0.355194	0.37	0.214	0.000987398	1
PADI2	1.82652e-08	0.253675	0.294	0.146	0.00101803	1
CLNS1A	1.8411e-08	0.282644	0.619	0.522	0.00102615	1
YPEL5	2.8991e-08	0.253594	0.723	0.632	0.00161584	1
DECR1	4.00369e-08	0.255812	0.654	0.552	0.00223149	1
DDX27	4.1724e-08	0.304165	0.595	0.474	0.00232553	1
HAPLN3	4.19525e-08	0.426532	0.301	0.176	0.00233826	1
WBSCR22	4.8491e-08	0.33152	0.557	0.467	0.00270269	1
FOXN2	5.17572e-08	0.324073	0.557	0.42	0.00288474	1
PHB2	5.40208e-08	0.251531	0.633	0.562	0.0030109	1
MIF4GD	6.75461e-08	0.410838	0.429	0.31	0.00376475	1
CD38	7.55476e-08	0.36475	0.433	0.281	0.00421072	1
RARRES3	8.1937e-08	0.367931	0.446	0.305	0.00456684	1
MAFF	8.53913e-08	0.352073	0.474	0.322	0.00475937	1
ACAP1	8.76354e-08	0.406529	0.336	0.202	0.00488445	1
RAB11FIP1	9.4032e-08	0.270344	0.609	0.454	0.00524097	1
ESYT2	9.66151e-08	0.291063	0.419	0.272	0.00538494	1
CCNH	1.0413e-07	0.25525	0.651	0.547	0.0058038	1
RP11-138A9.2	1.12729e-07	0.319493	0.55	0.416	0.00628307	1
CEBPD	1.14616e-07	0.253424	0.495	0.338	0.00638823	1
HGSNAT	1.2144e-07	0.286363	0.547	0.409	0.0067686	1
PLAGL1	1.24783e-07	0.384234	0.346	0.222	0.00695492	1
RBM12	1.2802e-07	0.306565	0.547	0.415	0.00713532	1
SPECC1	1.67401e-07	0.338222	0.453	0.323	0.00933029	1
CCND3	2.12013e-07	0.253862	0.612	0.534	0.0118168	1
GPRIN3	2.17543e-07	0.306804	0.522	0.406	0.012125	1
LY75	3.09297e-07	0.345865	0.422	0.3	0.017239	1
RUFY3	3.11598e-07	0.277015	0.332	0.196	0.0173672	1
PPA2	3.27161e-07	0.319209	0.526	0.435	0.0182347	1
LRMP	3.29547e-07	0.340971	0.353	0.221	0.0183676	1
RP11-632C17--A.1	3.55498e-07	0.279314	0.464	0.339	0.019814	1
TSC22D2	3.68125e-07	0.256417	0.675	0.561	0.0205178	1
NGLY1	4.11803e-07	0.257417	0.588	0.471	0.0229523	1
GBP1	4.20703e-07	0.282424	0.668	0.517	0.0234483	1
IL16	5.41151e-07	0.29715	0.509	0.375	0.0301616	1
LOH12CR1	5.76426e-07	0.313327	0.336	0.205	0.0321277	1
HOTAIRM1	6.1383e-07	0.29101	0.304	0.176	0.0342124	1
FBL	6.38476e-07	0.309677	0.522	0.437	0.0355861	1
PSMD6-AS2	6.42688e-07	0.316871	0.263	0.146	0.0358208	1
EIF2AK4	6.50599e-07	0.33413	0.401	0.278	0.0362618	1
FAM118A	6.55283e-07	0.318591	0.308	0.182	0.0365229	1
SNHG15	6.62701e-07	0.29027	0.554	0.422	0.0369363	1
MIR4435-1HG	7.0438e-07	0.281013	0.509	0.355	0.0392593	1
STK38L	7.0973e-07	0.335209	0.45	0.328	0.0395575	1
PRMT1	7.51402e-07	0.276097	0.512	0.438	0.0418801	1
RP11-543P15.1	8.02646e-07	0.271947	0.505	0.372	0.0447363	1
TP53	8.92056e-07	0.292819	0.585	0.478	0.0497196	1
TMEM131	1.07299e-06	0.283748	0.398	0.266	0.0598043	1
PKIB	1.1914e-06	0.445163	0.304	0.206	0.0664038	1
RP11-175B9.3	1.27234e-06	0.287439	0.398	0.271	0.0709151	1
GPR132	1.63573e-06	0.315451	0.45	0.322	0.0911692	1
TCTN3	1.68677e-06	0.419163	0.318	0.216	0.0940136	1
CASC7	1.70396e-06	0.269754	0.388	0.267	0.0949718	1
ATXN7	1.7715e-06	0.272528	0.512	0.377	0.0987362	1
IMPDH2	1.77831e-06	0.278316	0.526	0.449	0.0991156	1
CAMK2D	1.90247e-06	0.306841	0.509	0.402	0.106036	1
RP11-773D16.1	1.96896e-06	0.311622	0.294	0.174	0.109742	1
SH3BP5	2.02248e-06	0.297985	0.439	0.308	0.112725	1
RP11-147L13.2	2.0668e-06	0.27486	0.36	0.227	0.115195	1
PSTPIP2	2.34069e-06	0.266061	0.554	0.438	0.130461	1
RP11-421N8.1	2.46039e-06	0.290505	0.263	0.161	0.137132	1
BANP	2.55112e-06	0.31578	0.419	0.297	0.142189	1
TOR3A	2.73907e-06	0.342403	0.478	0.378	0.152665	1
VRK2	2.92885e-06	0.2844	0.533	0.417	0.163243	1
CASP9	3.13952e-06	0.301797	0.422	0.292	0.174984	1
TIPARP	3.51075e-06	0.282596	0.412	0.281	0.195675	1
DAPP1	3.57122e-06	0.293764	0.505	0.386	0.199046	1
SRP72	3.79789e-06	0.288788	0.522	0.415	0.211679	1
IL18BP	4.28907e-06	0.260292	0.561	0.451	0.239056	1
U2AF1L4	4.29089e-06	0.283149	0.433	0.313	0.239157	1
P2RY13	6.02185e-06	0.305528	0.394	0.279	0.335634	1
MKLN1-AS1	6.12086e-06	0.266953	0.488	0.36	0.341152	1
PMAIP1	7.10906e-06	0.35977	0.36	0.249	0.39623	1
SNRPA	7.61585e-06	0.270397	0.498	0.401	0.424477	1
DENND4A	8.08809e-06	0.305918	0.433	0.317	0.450798	1
METTL15	8.78101e-06	0.270485	0.353	0.244	0.489418	1
FDPS	1.00436e-05	0.298303	0.467	0.384	0.559791	1
SDE2	1.01308e-05	0.318403	0.301	0.199	0.564648	1
NAV1	1.0183e-05	0.267381	0.429	0.315	0.567558	1
FIBP	1.01855e-05	0.253848	0.512	0.455	0.5677	1
FBXO6	1.17315e-05	0.307745	0.415	0.307	0.653866	1
NFATC2	1.22791e-05	0.258141	0.277	0.174	0.684385	1
GAS6	1.39586e-05	0.282344	0.336	0.223	0.777997	1
TSPYL2	1.39956e-05	0.287257	0.28	0.171	0.780061	1
RFX5	1.55743e-05	0.304448	0.405	0.304	0.868049	1
LRRK1	1.9991e-05	0.290821	0.284	0.185	1	1
RFTN1	2.07771e-05	0.30278	0.384	0.283	1	1
RP11-373L24.1	2.43049e-05	0.256598	0.457	0.351	1	1
CEACAM4	2.50398e-05	0.301378	0.253	0.156	1	1
SLC41A2	2.53429e-05	0.299388	0.467	0.388	1	1
C12orf45	2.82446e-05	0.368074	0.332	0.253	1	1
SMIM14	2.97368e-05	0.310982	0.436	0.344	1	1
LMNB1	3.19862e-05	0.271345	0.266	0.168	1	1
NUP93	3.24274e-05	0.270011	0.488	0.408	1	1
TMEM39A	3.58607e-05	0.328058	0.419	0.338	1	1
CRLF3	4.08994e-05	0.263447	0.488	0.39	1	1
TRIM69	4.2025e-05	0.260596	0.426	0.315	1	1
FES	4.3301e-05	0.252463	0.536	0.466	1	1
ARHGAP5	4.33081e-05	0.315212	0.27	0.176	1	1
BCL2L11	4.40175e-05	0.265801	0.478	0.375	1	1
IDH3A	4.50894e-05	0.297945	0.446	0.37	1	1
LMBR1L	6.93461e-05	0.348402	0.277	0.188	1	1
GBP5	7.78188e-05	0.252856	0.481	0.363	1	1
ETHE1	7.98839e-05	0.273913	0.45	0.391	1	1
PIM2	8.7469e-05	0.258728	0.467	0.358	1	1
SERINC5	9.99552e-05	0.250669	0.329	0.225	1	1
SMN2	0.000107725	0.309872	0.401	0.324	1	1
ZNF791	0.000126227	0.256176	0.253	0.162	1	1
ADD3	0.000157424	0.275579	0.284	0.192	1	1
SP140	0.000167204	0.274422	0.298	0.206	1	1
RP11-138A9.1	0.000209755	0.272645	0.398	0.304	1	1
FAM60A	0.00021633	0.301271	0.346	0.269	1	1
TBC1D7	0.000221783	0.25955	0.349	0.256	1	1
GNL3	0.00029678	0.291631	0.412	0.356	1	1
KPNA2	0.000387935	0.267255	0.429	0.371	1	1
LDLRAD4	0.000401041	0.256475	0.467	0.398	1	1
MAD2L2	0.000416249	0.260398	0.377	0.304	1	1
JOSD1	0.000480733	0.263254	0.363	0.279	1	1
CCDC41	0.0010314	0.271119	0.263	0.192	1	1
NXT1	0.0010726	0.279139	0.391	0.332	1	1
PTRHD1	0.00111761	0.268633	0.37	0.329	1	1
PNO1	0.00114744	0.273222	0.28	0.214	1	1
CDK6	0.00117157	0.26055	0.311	0.234	1	1
LYSMD2	0.00128091	0.252221	0.367	0.305	1	1
BEX4	0.00145619	0.275688	0.367	0.315	1	1
KDM2B	0.00183598	0.254498	0.301	0.234	1	1
CTPS1	0.00195207	0.306003	0.253	0.194	1	1
LRRC41	0.00218157	0.257523	0.384	0.33	1	1
ADAM28	0.00241116	0.257751	0.391	0.335	1	1
FILIP1L	0.00317318	0.268176	0.266	0.205	1	1
PRKRA	0.00679101	0.250654	0.308	0.266	1	1
APOE	1.68615e-110	1.4111	0.856	0.181	9.39793e-106	2
A2M	4.27245e-109	1.31905	0.908	0.256	2.38129e-104	2
SEPP1	4.89886e-109	1.43128	0.542	0.033	2.73043e-104	2
C1QC	2.3082e-102	1.31342	0.967	0.327	1.2865e-97	2
APOC1	5.08827e-97	1.33967	0.867	0.221	2.836e-92	2
GPR34	6.1799e-95	1.16291	0.701	0.109	3.44443e-90	2
SLCO2B1	1.55074e-93	1.16376	0.926	0.291	8.64322e-89	2
C1QB	5.75466e-92	1.27333	0.97	0.331	3.20742e-87	2
TREM2	1.91448e-87	1.25258	0.768	0.193	1.06706e-82	2
FCGBP	1.32277e-85	0.89995	0.465	0.037	7.37257e-81	2
PLTP	5.47791e-84	1.19014	0.852	0.261	3.05317e-79	2
FOLR2	9.85761e-81	1.24759	0.683	0.136	5.49424e-76	2
GAL3ST4	9.56498e-77	0.993372	0.587	0.097	5.33114e-72	2
C2	1.74352e-72	1.12136	0.771	0.212	9.7177e-68	2
C1QA	1.6129e-69	1.08858	0.952	0.371	8.98965e-65	2
MAF	7.1655e-69	0.710292	0.782	0.223	3.99376e-64	2
GPNMB	8.16422e-66	0.990776	0.937	0.382	4.55041e-61	2
FRMD4A	3.28028e-65	0.800383	0.576	0.119	1.8283e-60	2
GATM	2.34705e-64	1.00103	0.52	0.09	1.30815e-59	2
SLC2A5	1.21316e-63	1.07415	0.649	0.18	6.76165e-59	2
HPGDS	6.24391e-62	0.974183	0.472	0.079	3.48011e-57	2
DAB2	7.15535e-61	0.884612	0.86	0.335	3.9881e-56	2
RNASE1	1.42675e-59	1.19801	0.679	0.183	7.95215e-55	2
NUPR1	4.22889e-59	1.08956	0.45	0.07	2.35701e-54	2
IGSF21	1.932e-57	0.655643	0.321	0.024	1.07682e-52	2
TSPAN15	2.31345e-55	0.801721	0.458	0.077	1.28943e-50	2
ADORA3	5.74406e-55	0.910137	0.539	0.116	3.20151e-50	2
LPAR5	5.61322e-53	0.667419	0.494	0.101	3.12859e-48	2
NRP1	4.14892e-52	0.794511	0.849	0.355	2.31244e-47	2
COLEC12	5.71536e-52	0.713871	0.502	0.117	3.18551e-47	2
TMEM37	5.92637e-52	0.873326	0.41	0.066	3.30312e-47	2
SDC3	8.13544e-52	0.65591	0.59	0.146	4.53437e-47	2
RND3	1.05425e-51	0.69583	0.354	0.043	5.87596e-47	2
SLC7A8	1.85614e-51	0.821703	0.539	0.126	1.03454e-46	2
CADM1	5.49007e-49	0.779491	0.439	0.078	3.05995e-44	2
FARP1	3.61305e-48	0.644419	0.387	0.062	2.01377e-43	2
NRP2	2.75034e-47	0.725516	0.701	0.25	1.53293e-42	2
EYA2	3.49021e-47	0.523993	0.258	0.018	1.94531e-42	2
NPL	1.25012e-45	0.787723	0.841	0.34	6.96767e-41	2
HSD17B14	1.30703e-45	0.698977	0.284	0.027	7.28487e-41	2
CD276	3.9226e-45	0.836086	0.601	0.198	2.1863e-40	2
KCNMA1	1.66255e-44	0.612679	0.435	0.087	9.26638e-40	2
SCD	2.10093e-44	0.711531	0.705	0.26	1.17097e-39	2
ANKH	6.4313e-44	0.652373	0.576	0.174	3.58455e-39	2
OLFML2B	1.02614e-43	0.781213	0.601	0.181	5.71927e-39	2
MYO7A	3.65956e-43	0.563863	0.432	0.089	2.03969e-38	2
PLA2G15	5.78028e-43	0.803153	0.664	0.233	3.2217e-38	2
GPX3	8.91694e-43	0.794015	0.686	0.241	4.96995e-38	2
LGALS3BP	6.78108e-42	0.792268	0.838	0.337	3.7795e-37	2
VAT1	4.51227e-41	0.756831	0.779	0.338	2.51496e-36	2
TSPAN4	5.94406e-41	0.74966	0.804	0.345	3.31298e-36	2
PIK3IP1	7.37804e-41	0.779199	0.52	0.15	4.11222e-36	2
FMNL2	3.57575e-40	0.628454	0.613	0.205	1.99298e-35	2
PMP22	7.88066e-40	0.759908	0.742	0.307	4.39237e-35	2
B3GNT7	3.96013e-39	0.673924	0.539	0.162	2.20722e-34	2
MSR1	6.45252e-39	0.716259	0.959	0.502	3.59638e-34	2
ECM1	1.11691e-38	0.699812	0.517	0.165	6.2252e-34	2
MERTK	2.11767e-38	0.661189	0.59	0.179	1.1803e-33	2
SLC29A1	3.44793e-38	0.675264	0.646	0.235	1.92174e-33	2
CD9	4.94589e-37	0.747698	0.849	0.378	2.75664e-32	2
PTPRM	5.69987e-37	0.502833	0.306	0.05	3.17688e-32	2
NBL1	1.58806e-36	0.414656	0.303	0.05	8.85124e-32	2
IL2RA	1.63465e-36	0.72665	0.472	0.137	9.11086e-32	2
LYVE1	4.46971e-36	0.674795	0.303	0.049	2.49124e-31	2
F13A1	5.48017e-36	0.770746	0.771	0.352	3.05443e-31	2
PLAU	6.09048e-35	0.739926	0.731	0.325	3.39459e-30	2
RP11-742B18.1	7.70714e-35	0.459183	0.262	0.035	4.29565e-30	2
LHFPL2	8.50489e-35	0.611773	0.731	0.309	4.74029e-30	2
SCARB1	1.73861e-34	0.656476	0.683	0.278	9.69031e-30	2
DOCK4	2.4172e-34	0.580959	0.734	0.307	1.34725e-29	2
HSD3B7	2.88388e-34	0.692219	0.554	0.189	1.60736e-29	2
SPP1	4.47066e-34	0.825745	0.738	0.341	2.49177e-29	2
ETV5	5.29934e-34	0.629501	0.653	0.261	2.95364e-29	2
RP11-792D21.2	9.10761e-34	0.656177	0.616	0.236	5.07622e-29	2
TANC2	1.1925e-33	0.458411	0.465	0.134	6.64653e-29	2
C1orf54	1.49507e-33	0.705104	0.694	0.283	8.33291e-29	2
MMP2	1.58419e-33	0.634471	0.321	0.064	8.82967e-29	2
EMP2	1.91638e-33	0.521367	0.251	0.034	1.06811e-28	2
FUCA1	4.09263e-33	0.703554	0.605	0.231	2.28107e-28	2
PER3	6.89245e-33	0.399567	0.288	0.049	3.84158e-28	2
ACP2	1.40494e-32	0.66048	0.749	0.34	7.83058e-28	2
CCND1	2.0871e-32	0.587387	0.476	0.144	1.16326e-27	2
IGFBP4	4.79453e-32	0.440827	0.269	0.044	2.67228e-27	2
S1PR1	5.74762e-32	0.535479	0.277	0.045	3.20349e-27	2
SPRED1	7.58401e-32	0.535405	0.542	0.203	4.22702e-27	2
TMEM86A	1.06537e-31	0.594017	0.395	0.103	5.93795e-27	2
HECTD2	1.15276e-31	0.443421	0.266	0.043	6.42503e-27	2
CD209	2.07468e-31	0.570644	0.358	0.086	1.15634e-26	2
SLC38A6	3.14478e-31	0.63815	0.642	0.269	1.75277e-26	2
DFNA5	1.41823e-30	0.646844	0.432	0.132	7.90466e-26	2
LGMN	2.35663e-30	0.740279	0.779	0.359	1.31349e-25	2
PPIC	6.09371e-30	0.591671	0.347	0.087	3.39639e-25	2
TNFRSF11A	8.41899e-30	0.472809	0.413	0.122	4.69241e-25	2
AXL	8.69001e-30	0.640774	0.701	0.271	4.84347e-25	2
EPS8	9.88406e-30	0.555125	0.472	0.155	5.50898e-25	2
ACE	2.17727e-29	0.470679	0.498	0.181	1.21352e-24	2
FCHO2	2.23226e-29	0.554089	0.59	0.238	1.24417e-24	2
ABCC5	2.498e-29	0.563443	0.469	0.154	1.39229e-24	2
SLC40A1	4.95009e-29	0.704689	0.277	0.052	2.75898e-24	2
AKR1B1	8.67978e-29	0.667396	0.731	0.344	4.83776e-24	2
LTC4S	9.91182e-29	0.53737	0.28	0.053	5.52445e-24	2
IDH1	1.81639e-28	0.619191	0.749	0.376	1.01238e-23	2
ITGB5	2.81433e-28	0.516055	0.317	0.072	1.56859e-23	2
PTGS1	3.2795e-28	0.579899	0.786	0.417	1.82786e-23	2
CD59	3.31234e-28	0.615364	0.664	0.3	1.84616e-23	2
CNRIP1	4.72563e-28	0.553674	0.31	0.074	2.63388e-23	2
MMP14	9.51826e-28	0.527379	0.531	0.206	5.3051e-23	2
MGAT4A	9.54399e-28	0.565125	0.786	0.405	5.31944e-23	2
ARHGAP18	1.01003e-27	0.495591	0.915	0.542	5.6295e-23	2
FRMD4B	1.3289e-27	0.563819	0.727	0.344	7.40675e-23	2
FKBP9	1.49214e-27	0.508005	0.439	0.142	8.31658e-23	2
ME1	2.27182e-27	0.646593	0.406	0.128	1.26622e-22	2
BLNK	4.94536e-27	0.576286	0.494	0.176	2.75635e-22	2
VSIG4	5.17677e-27	0.634789	0.838	0.426	2.88532e-22	2
PCED1B	6.00631e-27	0.505054	0.299	0.071	3.34768e-22	2
MS4A4A	8.22799e-27	0.616272	0.808	0.428	4.58595e-22	2
AC007362.1	9.64917e-27	0.451338	0.258	0.052	5.37806e-22	2
TCF12	1.73043e-26	0.560795	0.742	0.369	9.64471e-22	2
MITF	3.04308e-26	0.578964	0.627	0.278	1.69609e-21	2
SORBS3	3.84101e-26	0.523061	0.572	0.224	2.14082e-21	2
ADAM9	3.88437e-26	0.520454	0.841	0.464	2.16499e-21	2
STAB1	7.95837e-26	0.535305	0.908	0.494	4.43568e-21	2
LILRB5	2.35091e-25	0.685956	0.631	0.355	1.31031e-20	2
DSC2	3.53683e-25	0.466022	0.62	0.272	1.97129e-20	2
AP2A2	1.00443e-24	0.466065	0.661	0.313	5.59828e-20	2
BCL2L1	1.26467e-24	0.485043	0.679	0.305	7.04874e-20	2
ABCG1	2.66088e-24	0.539542	0.638	0.297	1.48307e-19	2
TM6SF1	2.91811e-24	0.573106	0.646	0.294	1.62644e-19	2
SLC1A3	3.24857e-24	0.57073	0.601	0.273	1.81062e-19	2
CD81	3.50853e-24	0.548378	0.742	0.388	1.95551e-19	2
IFI27	3.99339e-24	0.675288	0.332	0.088	2.22576e-19	2
STARD13	6.33085e-24	0.423206	0.28	0.068	3.52856e-19	2
BAIAP2	6.34931e-24	0.532544	0.539	0.211	3.53885e-19	2
FAM213A	9.06295e-24	0.574522	0.391	0.135	5.05132e-19	2
PLD3	1.18148e-23	0.533741	0.945	0.592	6.58507e-19	2
ASPH	1.25185e-23	0.4675	0.742	0.385	6.97729e-19	2
BMP2K	1.44184e-23	0.435039	0.627	0.283	8.03627e-19	2
PTGR1	1.51397e-23	0.609001	0.41	0.151	8.43827e-19	2
NR1H3	2.49508e-23	0.567469	0.535	0.22	1.39066e-18	2
ITSN1	2.99053e-23	0.489944	0.461	0.175	1.6668e-18	2
LPL	3.15484e-23	0.483172	0.28	0.071	1.75838e-18	2
SMPDL3A	3.41585e-23	0.576757	0.583	0.26	1.90386e-18	2
DTNB	4.59483e-23	0.490338	0.336	0.099	2.56097e-18	2
EPB41L2	1.12025e-22	0.56994	0.576	0.271	6.24382e-18	2
LGMNP1	1.32247e-22	0.323255	0.41	0.147	7.37091e-18	2
GALC	1.33802e-22	0.519963	0.62	0.306	7.4576e-18	2
PLA2G16	1.69147e-22	0.515774	0.347	0.101	9.42759e-18	2
GSTT1	1.94802e-22	0.546056	0.369	0.123	1.08575e-17	2
PWP2	2.05476e-22	0.485076	0.424	0.157	1.14524e-17	2
DHRS3	2.21069e-22	0.561563	0.841	0.428	1.23215e-17	2
SLC36A1	2.2183e-22	0.469423	0.498	0.203	1.23639e-17	2
ADAP2	2.33442e-22	0.51527	0.804	0.436	1.30111e-17	2
CACNA2D4	2.58996e-22	0.51341	0.568	0.253	1.44354e-17	2
IL18	3.2785e-22	0.537391	0.69	0.353	1.8273e-17	2
APPL2	5.99795e-22	0.399565	0.472	0.187	3.34302e-17	2
C1orf85	6.56719e-22	0.530007	0.69	0.337	3.66029e-17	2
CTTNBP2NL	9.12142e-22	0.497393	0.653	0.313	5.08391e-17	2
EEF2K	1.35935e-21	0.437352	0.498	0.217	7.5765e-17	2
CYB5R1	1.55892e-21	0.53156	0.613	0.282	8.6888e-17	2
CREG1	2.20059e-21	0.507984	0.923	0.538	1.22652e-16	2
MYO5A	2.40232e-21	0.399383	0.727	0.383	1.33896e-16	2
PLOD1	2.4222e-21	0.516559	0.708	0.367	1.35004e-16	2
PLXND1	2.74081e-21	0.431494	0.904	0.54	1.52762e-16	2
LXN	4.98064e-21	0.466421	0.258	0.064	2.77601e-16	2
UNC5B	5.20514e-21	0.337453	0.269	0.073	2.90114e-16	2
RPS6KA2	5.39011e-21	0.340951	0.306	0.09	3.00423e-16	2
MPC2	6.51722e-21	0.5572	0.624	0.312	3.63244e-16	2
CD84	7.19469e-21	0.428149	0.875	0.518	4.01003e-16	2
SLC46A1	7.19965e-21	0.361242	0.317	0.094	4.0128e-16	2
LPAR6	7.48722e-21	0.503917	0.686	0.349	4.17308e-16	2
P4HA2	9.48686e-21	0.512238	0.362	0.123	5.2876e-16	2
CTB-147C22.3	1.31621e-20	0.473306	0.557	0.268	7.33603e-16	2
CRYL1	1.3243e-20	0.478501	0.52	0.222	7.3811e-16	2
MMD	1.74101e-20	0.433519	0.38	0.137	9.70369e-16	2
TMEM9	1.98351e-20	0.507402	0.376	0.132	1.10553e-15	2
MAGED2	2.61016e-20	0.535913	0.52	0.224	1.4548e-15	2
PCED1B-AS1	2.71593e-20	0.546565	0.528	0.234	1.51375e-15	2
SLC16A10	3.42607e-20	0.411287	0.373	0.133	1.90955e-15	2
NFATC2	3.56488e-20	0.352341	0.399	0.146	1.98692e-15	2
PAQR3	3.68421e-20	0.347202	0.465	0.194	2.05343e-15	2
TMEM176B	4.85934e-20	0.57022	0.782	0.423	2.7084e-15	2
CTSL	5.3394e-20	0.449036	0.967	0.619	2.97597e-15	2
CALU	6.37513e-20	0.465942	0.734	0.403	3.55325e-15	2
KLHDC8B	7.52074e-20	0.493888	0.288	0.083	4.19176e-15	2
SNX24	9.67544e-20	0.463035	0.28	0.08	5.3927e-15	2
ICA1	1.01816e-19	0.485896	0.28	0.084	5.67481e-15	2
RAPH1	1.04082e-19	0.401477	0.524	0.233	5.80113e-15	2
AMDHD2	1.08348e-19	0.487626	0.465	0.184	6.03887e-15	2
TCEAL4	1.11083e-19	0.505103	0.583	0.287	6.19131e-15	2
SLC38A7	1.37845e-19	0.412607	0.491	0.209	7.68292e-15	2
TMEM176A	1.46627e-19	0.585604	0.646	0.326	8.17238e-15	2
ABHD12	1.53135e-19	0.494169	0.635	0.322	8.53511e-15	2
GPR155	1.80512e-19	0.385862	0.362	0.127	1.0061e-14	2
GNPTAB	2.30643e-19	0.354884	0.668	0.347	1.28551e-14	2
WFS1	2.88654e-19	0.382697	0.269	0.077	1.60884e-14	2
SLC37A4	3.21161e-19	0.465575	0.38	0.146	1.79002e-14	2
ABCA1	3.26095e-19	0.38088	0.934	0.599	1.81753e-14	2
CHID1	3.37168e-19	0.49889	0.605	0.307	1.87924e-14	2
LOXL3	4.39318e-19	0.419716	0.428	0.165	2.44858e-14	2
MRC1L1	7.05247e-19	0.469655	0.734	0.396	3.93076e-14	2
GALM	7.49075e-19	0.475961	0.683	0.359	4.17505e-14	2
ALOX5AP	9.12911e-19	0.484633	0.797	0.471	5.0882e-14	2
ABCC3	9.82093e-19	0.430673	0.568	0.268	5.47379e-14	2
PDPN	1.05736e-18	0.48895	0.384	0.143	5.89332e-14	2
ARHGAP22	1.0903e-18	0.438049	0.435	0.179	6.07691e-14	2
RASGRP3	1.3521e-18	0.426829	0.465	0.195	7.53608e-14	2
ZNF618	1.44635e-18	0.340693	0.251	0.069	8.06135e-14	2
INF2	1.52209e-18	0.463487	0.576	0.301	8.48352e-14	2
WDR91	1.53595e-18	0.416961	0.465	0.201	8.56076e-14	2
TGFBR1	2.13092e-18	0.369784	0.498	0.218	1.18769e-13	2
ACY1	2.25658e-18	0.486076	0.402	0.162	1.25773e-13	2
SGPP1	2.2884e-18	0.269294	0.273	0.078	1.27546e-13	2
C3	2.59599e-18	0.688759	0.376	0.151	1.4469e-13	2
ST6GAL1	2.65112e-18	0.463116	0.69	0.374	1.47763e-13	2
LAMB2	2.70302e-18	0.43797	0.336	0.116	1.50656e-13	2
LINC00998	3.64584e-18	0.494306	0.568	0.286	2.03205e-13	2
USP53	3.99009e-18	0.381327	0.299	0.099	2.22391e-13	2
TMEM51	4.27215e-18	0.396024	0.565	0.278	2.38112e-13	2
TNFSF12	4.37009e-18	0.476708	0.439	0.193	2.43571e-13	2
CYFIP1	4.75322e-18	0.404315	0.863	0.588	2.64926e-13	2
PROS1	4.89548e-18	0.364234	0.303	0.099	2.72854e-13	2
PLXNA1	7.90826e-18	0.375925	0.506	0.232	4.40775e-13	2
BNIP3	9.34535e-18	0.528833	0.52	0.246	5.20872e-13	2
MGAT5	1.0064e-17	0.372676	0.31	0.108	5.60927e-13	2
TRPM4	1.06043e-17	0.368527	0.491	0.215	5.9104e-13	2
BIN1	1.34941e-17	0.379837	0.421	0.169	7.52107e-13	2
TLR7	1.45703e-17	0.405864	0.421	0.175	8.12093e-13	2
DYNLT3	1.53877e-17	0.456973	0.465	0.206	8.57652e-13	2
GNPDA1	2.06146e-17	0.447708	0.631	0.326	1.14898e-12	2
MGST3	2.19551e-17	0.49249	0.856	0.498	1.22369e-12	2
CD109	2.86627e-17	0.359849	0.443	0.208	1.59755e-12	2
FCGR3B	2.92246e-17	0.359929	0.779	0.425	1.62886e-12	2
SPIN1	2.99707e-17	0.388249	0.52	0.24	1.67045e-12	2
GPR137B	3.11884e-17	0.376851	0.59	0.284	1.73831e-12	2
AC016683.6	3.54467e-17	0.378739	0.384	0.141	1.97566e-12	2
NEU1	4.2503e-17	0.439603	0.782	0.445	2.36895e-12	2
AKIP1	4.81926e-17	0.464335	0.461	0.21	2.68606e-12	2
ST3GAL6	5.00844e-17	0.433938	0.646	0.342	2.7915e-12	2
SWAP70	5.49844e-17	0.40606	0.661	0.354	3.06461e-12	2
BNIP3P1	5.50334e-17	0.281273	0.399	0.165	3.06734e-12	2
MARCKS	5.69887e-17	0.379851	0.934	0.609	3.17632e-12	2
CYBRD1	5.95569e-17	0.476814	0.413	0.177	3.31946e-12	2
CTD-2369P2.2	6.59074e-17	0.468121	0.624	0.335	3.67342e-12	2
SOCS6	7.03998e-17	0.332204	0.365	0.137	3.9238e-12	2
EPAS1	7.38483e-17	0.406204	0.406	0.17	4.11601e-12	2
SERPINH1	8.57219e-17	0.449104	0.454	0.201	4.7778e-12	2
EPS15	8.95245e-17	0.364291	0.782	0.488	4.98974e-12	2
CPM	9.57707e-17	0.444514	0.716	0.392	5.33787e-12	2
VMO1	1.35198e-16	0.501199	0.487	0.215	7.53538e-12	2
CLDN7	1.58334e-16	0.406993	0.258	0.08	8.82489e-12	2
CBLB	1.73908e-16	0.36471	0.446	0.201	9.69294e-12	2
MRC2	2.53689e-16	0.34716	0.406	0.172	1.41396e-11	2
RPL23AP7	2.5758e-16	0.430089	0.376	0.156	1.43565e-11	2
LPIN3	2.94306e-16	0.394953	0.258	0.086	1.64034e-11	2
TTC38	3.04272e-16	0.400933	0.413	0.176	1.69589e-11	2
MTSS1	3.60934e-16	0.340173	0.661	0.331	2.0117e-11	2
HEXA	3.7313e-16	0.423085	0.923	0.569	2.07968e-11	2
GM2A	4.11688e-16	0.413257	0.86	0.545	2.29458e-11	2
ZFYVE21	4.57459e-16	0.45677	0.406	0.175	2.54969e-11	2
ENO2	4.73256e-16	0.439022	0.373	0.152	2.63774e-11	2
PEAK1	4.89059e-16	0.308517	0.487	0.232	2.72582e-11	2
GTF3C1	5.21816e-16	0.449217	0.528	0.28	2.9084e-11	2
DNMT3A	6.44137e-16	0.298094	0.443	0.2	3.59016e-11	2
PTMS	6.80645e-16	0.377612	0.476	0.22	3.79365e-11	2
DST	7.13282e-16	0.397064	0.498	0.243	3.97555e-11	2
SERPINF1	7.3169e-16	0.543937	0.454	0.207	4.07815e-11	2
AIFM2	7.68769e-16	0.371618	0.295	0.107	4.28481e-11	2
ENOSF1	8.1747e-16	0.421911	0.487	0.241	4.55625e-11	2
SYNE1	9.02276e-16	0.371875	0.494	0.241	5.02893e-11	2
SLC2A8	9.09965e-16	0.419733	0.277	0.093	5.07178e-11	2
ACOT2	1.26238e-15	0.40095	0.395	0.172	7.03598e-11	2
SNURF	1.27684e-15	0.42663	0.428	0.187	7.11657e-11	2
PSD3	1.33312e-15	0.383306	0.384	0.162	7.43026e-11	2
CDCA7L	1.57546e-15	0.44703	0.28	0.1	8.78098e-11	2
NFIC	1.63282e-15	0.338572	0.675	0.393	9.10069e-11	2
HNMT	1.91162e-15	0.439497	0.775	0.453	1.06546e-10	2
PON2	2.42587e-15	0.418417	0.561	0.276	1.35208e-10	2
FGD5	2.42599e-15	0.31432	0.266	0.091	1.35215e-10	2
PLEK2	2.65798e-15	0.431543	0.295	0.11	1.48145e-10	2
TTYH3	2.72961e-15	0.335109	0.856	0.576	1.52137e-10	2
CUTA	2.73724e-15	0.423961	0.753	0.427	1.52563e-10	2
HS3ST1	2.85574e-15	0.262861	0.347	0.131	1.59168e-10	2
MYO1C	3.61122e-15	0.376632	0.446	0.208	2.01275e-10	2
CDCP1	4.14144e-15	0.364055	0.601	0.323	2.30827e-10	2
TMEM70	4.22269e-15	0.40809	0.653	0.359	2.35356e-10	2
ALCAM	4.41332e-15	0.405581	0.705	0.433	2.45981e-10	2
TFPT	4.59886e-15	0.408228	0.476	0.227	2.56322e-10	2
CD163	4.63813e-15	0.409953	0.915	0.595	2.58511e-10	2
ACOT1	5.68236e-15	0.286317	0.306	0.117	3.16712e-10	2
ENPP4	5.88347e-15	0.354525	0.362	0.153	3.27921e-10	2
NMRK1	6.95707e-15	0.405027	0.373	0.154	3.87759e-10	2
DRAM1	1.03252e-14	0.366627	0.727	0.429	5.75485e-10	2
P2RY11	1.25186e-14	0.435942	0.417	0.21	6.97736e-10	2
SLC29A3	1.39636e-14	0.395278	0.509	0.259	7.78278e-10	2
KIAA1737	1.42146e-14	0.345555	0.284	0.104	7.92264e-10	2
NHLRC3	1.59795e-14	0.34131	0.587	0.312	8.90635e-10	2
VEGFB	1.63293e-14	0.351452	0.292	0.107	9.10131e-10	2
DOCK1	1.79385e-14	0.288815	0.306	0.12	9.99821e-10	2
TNS3	1.87736e-14	0.36518	0.808	0.504	1.04636e-09	2
AC002055.4	2.12568e-14	0.387192	0.498	0.256	1.18477e-09	2
GIMAP5	2.19413e-14	0.382147	0.568	0.291	1.22292e-09	2
FMNL3	2.43324e-14	0.292073	0.804	0.503	1.35619e-09	2
TNS1	2.59139e-14	0.355201	0.683	0.387	1.44434e-09	2
RDH11	2.63163e-14	0.3043	0.786	0.491	1.46676e-09	2
PEPD	3.03129e-14	0.423053	0.69	0.409	1.68952e-09	2
PEBP1	3.07369e-14	0.438424	0.797	0.485	1.71315e-09	2
CITED2	3.32965e-14	0.324664	0.509	0.264	1.85581e-09	2
SUCLG2	3.34116e-14	0.406784	0.568	0.306	1.86223e-09	2
SLC4A7	3.58371e-14	0.286578	0.542	0.287	1.99741e-09	2
MAPK13	3.95011e-14	0.378515	0.31	0.126	2.20164e-09	2
TCF4	4.49501e-14	0.33764	0.657	0.392	2.50534e-09	2
CPED1	4.58036e-14	0.359433	0.413	0.189	2.55291e-09	2
HLA-DOA	4.69745e-14	0.479247	0.638	0.363	2.61817e-09	2
HMOX1	4.94042e-14	0.374464	0.786	0.447	2.7536e-09	2
ARMCX1	5.32887e-14	0.385757	0.306	0.118	2.9701e-09	2
SUMF2	5.53385e-14	0.329487	0.871	0.615	3.08435e-09	2
UACA	6.18543e-14	0.331561	0.303	0.118	3.44751e-09	2
CHST11	6.41305e-14	0.289511	0.528	0.269	3.57437e-09	2
NHSL1	6.4766e-14	0.285329	0.432	0.206	3.6098e-09	2
FCGR3A	7.23957e-14	0.424975	0.959	0.629	4.03505e-09	2
SLC2A9	7.63586e-14	0.35774	0.461	0.224	4.25592e-09	2
SIGLEC1	8.95923e-14	0.351447	0.613	0.325	4.99352e-09	2
FECH	9.42031e-14	0.349921	0.38	0.171	5.2505e-09	2
SLC17A5	9.9261e-14	0.330909	0.458	0.223	5.53241e-09	2
SCARB2	1.03542e-13	0.37136	0.742	0.431	5.77101e-09	2
FAM213B	1.06872e-13	0.345065	0.31	0.121	5.95662e-09	2
RAB9A	1.10069e-13	0.30718	0.572	0.303	6.13478e-09	2
MRC1	1.28814e-13	0.355602	0.594	0.316	7.17959e-09	2
SMURF2	1.30889e-13	0.315625	0.435	0.22	7.29525e-09	2
PALD1	1.61468e-13	0.323655	0.339	0.143	8.99956e-09	2
RAP2A	1.7808e-13	0.279539	0.443	0.222	9.92546e-09	2
UGCG	1.84728e-13	0.37342	0.535	0.288	1.0296e-08	2
PKIB	2.18008e-13	0.426186	0.399	0.184	1.21509e-08	2
GCHFR	2.35808e-13	0.450057	0.317	0.132	1.3143e-08	2
FCGR1C	2.39652e-13	0.345348	0.686	0.407	1.33572e-08	2
NTAN1	2.45847e-13	0.443437	0.384	0.178	1.37025e-08	2
TIMP2	2.46722e-13	0.298839	0.605	0.336	1.37513e-08	2
ZMYM6NB	2.61061e-13	0.380253	0.609	0.321	1.45505e-08	2
PTPRO	2.72775e-13	0.411685	0.428	0.216	1.52034e-08	2
ATP2C1	2.9107e-13	0.368218	0.642	0.382	1.62231e-08	2
ACOT11	3.13448e-13	0.251442	0.347	0.148	1.74703e-08	2
PPFIBP2	3.31328e-13	0.353187	0.443	0.212	1.84669e-08	2
SYT11	3.37045e-13	0.302769	0.461	0.229	1.87855e-08	2
SCCPDH	3.44731e-13	0.370047	0.406	0.195	1.92139e-08	2
ENPP2	3.52501e-13	0.409881	0.417	0.2	1.9647e-08	2
CCL3L1	4.03813e-13	0.415933	0.62	0.341	2.25069e-08	2
ADCY3	4.15853e-13	0.370931	0.358	0.16	2.3178e-08	2
ZBTB38	5.03312e-13	0.343202	0.465	0.239	2.80526e-08	2
SLC48A1	5.08933e-13	0.343188	0.365	0.168	2.83659e-08	2
DCTN2	5.82747e-13	0.379299	0.775	0.491	3.248e-08	2
NCEH1	5.848e-13	0.3439	0.605	0.345	3.25944e-08	2
ATP8B4	6.69387e-13	0.314366	0.487	0.241	3.73089e-08	2
DENND4C	6.70587e-13	0.260096	0.557	0.302	3.73758e-08	2
SLC39A1	7.84067e-13	0.377851	0.782	0.476	4.37008e-08	2
TPCN1	7.87903e-13	0.33149	0.672	0.4	4.39146e-08	2
RGS1	8.49907e-13	0.421397	0.871	0.571	4.73704e-08	2
DHRS7	8.65994e-13	0.386493	0.782	0.483	4.8267e-08	2
ARL4C	9.7329e-13	0.331687	0.513	0.257	5.42473e-08	2
TCN2	1.01109e-12	0.396902	0.531	0.272	5.63541e-08	2
TMEM60	1.03481e-12	0.34892	0.454	0.218	5.76763e-08	2
ARL3	1.07764e-12	0.257931	0.369	0.166	6.00634e-08	2
LMAN1	1.07798e-12	0.3428	0.498	0.268	6.00825e-08	2
PRKACB	1.10644e-12	0.321227	0.476	0.239	6.16685e-08	2
CCL5	1.10944e-12	0.429639	0.432	0.224	6.18359e-08	2
ARL2	1.13361e-12	0.40341	0.598	0.34	6.31831e-08	2
CCL2	1.16025e-12	0.383034	0.557	0.279	6.46678e-08	2
YWHAH	1.30394e-12	0.334929	0.668	0.394	7.26764e-08	2
APMAP	1.38737e-12	0.386035	0.771	0.491	7.73267e-08	2
PYGL	1.59887e-12	0.34434	0.649	0.388	8.91145e-08	2
SCOC	1.66644e-12	0.366672	0.461	0.241	9.28806e-08	2
DUSP3	1.70176e-12	0.34031	0.768	0.478	9.48496e-08	2
KIAA1715	1.71999e-12	0.314527	0.476	0.25	9.58652e-08	2
ABHD4	1.79251e-12	0.369009	0.258	0.096	9.99073e-08	2
TMEM19	2.09189e-12	0.304642	0.443	0.22	1.16594e-07	2
HAUS4	2.22723e-12	0.356228	0.631	0.363	1.24137e-07	2
DSTN	2.31024e-12	0.368316	0.727	0.443	1.28764e-07	2
ANKRD37	2.47055e-12	0.360574	0.483	0.245	1.37699e-07	2
SNRPN	2.51384e-12	0.346029	0.399	0.187	1.40111e-07	2
SLC46A3	2.88698e-12	0.369854	0.384	0.181	1.60909e-07	2
PROCR	3.04504e-12	0.414307	0.369	0.177	1.69719e-07	2
SLC11A2	3.07881e-12	0.324287	0.672	0.392	1.71601e-07	2
SUPT7L	3.13555e-12	0.320916	0.476	0.25	1.74763e-07	2
CA11	3.35048e-12	0.319465	0.255	0.097	1.86742e-07	2
STEAP3	3.46602e-12	0.361398	0.487	0.252	1.93182e-07	2
CYP27A1	3.71504e-12	0.368927	0.399	0.187	2.07061e-07	2
PDZD11	3.96268e-12	0.404785	0.45	0.238	2.20864e-07	2
CDS2	3.99503e-12	0.34573	0.686	0.41	2.22667e-07	2
CDK4	4.47553e-12	0.387714	0.572	0.318	2.49448e-07	2
DYRK4	4.49817e-12	0.328738	0.395	0.185	2.5071e-07	2
ARHGAP12	4.52446e-12	0.29243	0.288	0.115	2.52176e-07	2
ILVBL	5.04236e-12	0.404585	0.465	0.249	2.81041e-07	2
DNASE2	5.52284e-12	0.406788	0.609	0.343	3.07821e-07	2
PDCD1LG2	5.57041e-12	0.398625	0.292	0.126	3.10472e-07	2
IFI27L2	6.57488e-12	0.371808	0.605	0.35	3.66458e-07	2
DNPH1	6.63136e-12	0.383925	0.668	0.399	3.69605e-07	2
ADH5	7.22978e-12	0.345971	0.531	0.284	4.02959e-07	2
CMKLR1	7.69544e-12	0.400048	0.476	0.263	4.28913e-07	2
RP11-1008C21.1	8.22619e-12	0.408125	0.284	0.117	4.58495e-07	2
GIMAP6	9.34462e-12	0.30297	0.476	0.25	5.20831e-07	2
KIAA1430	9.69889e-12	0.302494	0.354	0.165	5.40577e-07	2
PXDC1	9.75606e-12	0.275552	0.28	0.116	5.43764e-07	2
CH25H	1.00597e-11	0.368482	0.292	0.118	5.60686e-07	2
CCL4L2	1.2532e-11	0.36227	0.579	0.332	6.98483e-07	2
PRPF40B	1.26161e-11	0.295926	0.672	0.396	7.03169e-07	2
TPD52	1.32671e-11	0.355608	0.31	0.134	7.39456e-07	2
SMS	1.33355e-11	0.334874	0.731	0.456	7.43267e-07	2
FAM198B	1.36617e-11	0.302263	0.565	0.317	7.61448e-07	2
FN1	1.3783e-11	0.416651	0.635	0.345	7.6821e-07	2
ABCC10	1.56017e-11	0.277916	0.343	0.157	8.69576e-07	2
HSPB1	1.56873e-11	0.313929	0.915	0.638	8.7435e-07	2
PGPEP1	1.6692e-11	0.262094	0.339	0.154	9.30345e-07	2
TCEAL3	1.69629e-11	0.303533	0.347	0.155	9.45445e-07	2
TMEM106B	1.71032e-11	0.304118	0.347	0.162	9.53261e-07	2
POMT1	1.7269e-11	0.331185	0.347	0.161	9.62508e-07	2
TNFSF9	1.73625e-11	0.260962	0.292	0.124	9.67715e-07	2
EI24	1.86245e-11	0.303792	0.325	0.147	1.03805e-06	2
AKAP10	2.02452e-11	0.250479	0.587	0.335	1.12839e-06	2
ARFIP1	2.05496e-11	0.320465	0.435	0.224	1.14535e-06	2
FCGR1A	2.0774e-11	0.34854	0.86	0.567	1.15786e-06	2
OSBPL1A	2.12105e-11	0.296301	0.317	0.141	1.18219e-06	2
DOCK7	2.12696e-11	0.292373	0.332	0.156	1.18548e-06	2
DAGLB	2.23791e-11	0.300176	0.635	0.372	1.24732e-06	2
SLC37A2	2.49631e-11	0.350299	0.679	0.408	1.39134e-06	2
SLC22A18	2.56913e-11	0.328436	0.395	0.187	1.43193e-06	2
GGTA1P	2.75207e-11	0.387447	0.354	0.17	1.5339e-06	2
RGL1	2.78911e-11	0.277862	0.517	0.269	1.55454e-06	2
SLC17A9	3.15052e-11	0.305227	0.509	0.278	1.75597e-06	2
RMDN3	3.19962e-11	0.38117	0.347	0.166	1.78334e-06	2
CCL4	3.27963e-11	0.417353	0.616	0.366	1.82794e-06	2
SSH1	3.38668e-11	0.278281	0.443	0.236	1.8876e-06	2
FUCA2	3.61e-11	0.342054	0.731	0.458	2.01207e-06	2
ARID5B	3.86702e-11	0.272418	0.631	0.383	2.15532e-06	2
TEX264	3.93615e-11	0.367169	0.62	0.37	2.19385e-06	2
IFFO1	3.98993e-11	0.281989	0.539	0.308	2.22383e-06	2
TWSG1	4.12598e-11	0.2898	0.373	0.181	2.29965e-06	2
SGSH	4.27655e-11	0.309241	0.609	0.348	2.38358e-06	2
LIPA	4.32575e-11	0.37998	0.875	0.598	2.411e-06	2
ALDH6A1	4.40029e-11	0.294967	0.306	0.137	2.45255e-06	2
ACSF2	4.40942e-11	0.388177	0.347	0.161	2.45764e-06	2
GOLGA4	4.46704e-11	0.276612	0.631	0.365	2.48975e-06	2
BCAT1	4.942e-11	0.321113	0.768	0.484	2.75447e-06	2
TLR5	5.72221e-11	0.33398	0.358	0.165	3.18933e-06	2
C3AR1	5.82462e-11	0.357599	0.882	0.57	3.24641e-06	2
ECHDC2	5.83192e-11	0.299499	0.28	0.118	3.25048e-06	2
MAN2B2	6.54303e-11	0.285145	0.69	0.434	3.64682e-06	2
ABCD4	6.68629e-11	0.294882	0.509	0.284	3.72667e-06	2
SHMT1	7.94118e-11	0.36569	0.255	0.107	4.4261e-06	2
RDX	8.25983e-11	0.265887	0.542	0.302	4.6037e-06	2
EOGT	9.57634e-11	0.299192	0.28	0.122	5.33747e-06	2
AP001007.1	9.83054e-11	0.302502	0.583	0.341	5.47915e-06	2
DCAF6	9.90824e-11	0.257034	0.524	0.301	5.52246e-06	2
TPGS2	9.96905e-11	0.335439	0.483	0.271	5.55635e-06	2
GAS6	1.08551e-10	0.330032	0.406	0.208	6.05018e-06	2
ENG	1.11037e-10	0.301454	0.886	0.598	6.18876e-06	2
CCDC53	1.29358e-10	0.377771	0.565	0.327	7.20991e-06	2
CCL3L3	1.37171e-10	0.309291	0.635	0.38	7.64538e-06	2
RP11-295P9.3	1.54923e-10	0.261881	0.295	0.131	8.6348e-06	2
MAN1B1	1.60506e-10	0.30061	0.506	0.284	8.94599e-06	2
GSTM4	1.62947e-10	0.320958	0.343	0.165	9.08203e-06	2
CLN8	1.66156e-10	0.277752	0.576	0.324	9.26088e-06	2
PHYH	1.77397e-10	0.350559	0.339	0.163	9.88742e-06	2
TBC1D9B	1.78545e-10	0.285169	0.838	0.564	9.95138e-06	2
RP11-161H23.5	1.79929e-10	0.329295	0.723	0.464	1.00285e-05	2
CREB3L2	1.88054e-10	0.250385	0.62	0.387	1.04814e-05	2
CYB5A	1.88216e-10	0.402959	0.417	0.222	1.04904e-05	2
KIAA0226L	1.89901e-10	0.268083	0.325	0.147	1.05843e-05	2
FILIP1L	2.03838e-10	0.282399	0.369	0.181	1.13611e-05	2
ME2	2.20095e-10	0.279566	0.509	0.284	1.22672e-05	2
GALNT6	2.20165e-10	0.293884	0.384	0.195	1.22711e-05	2
MPZL1	2.25149e-10	0.34326	0.498	0.277	1.25489e-05	2
TMEM144	2.54557e-10	0.300664	0.391	0.195	1.4188e-05	2
ITGAV	2.62161e-10	0.314822	0.476	0.268	1.46118e-05	2
HEBP1	2.93259e-10	0.29708	0.513	0.277	1.63451e-05	2
MTMR2	3.00272e-10	0.2726	0.339	0.164	1.67359e-05	2
GOLIM4	3.04014e-10	0.267708	0.889	0.622	1.69445e-05	2
SLC9A9	3.14104e-10	0.272936	0.443	0.224	1.75069e-05	2
MRPL17	3.23727e-10	0.334544	0.517	0.3	1.80433e-05	2
PCCB	3.24984e-10	0.333769	0.524	0.304	1.81133e-05	2
HADH	3.26398e-10	0.347227	0.391	0.206	1.81921e-05	2
AC009469.1	3.27156e-10	0.292296	0.336	0.164	1.82344e-05	2
LMNA	3.30999e-10	0.329763	0.856	0.554	1.84486e-05	2
ZNF438	3.7167e-10	0.264634	0.38	0.195	2.07154e-05	2
GYPC	3.76652e-10	0.345476	0.583	0.359	2.09931e-05	2
CD99L2	3.88392e-10	0.272777	0.365	0.183	2.16474e-05	2
AP1B1	4.03657e-10	0.289283	0.871	0.67	2.24982e-05	2
SLC39A13	4.04601e-10	0.26005	0.502	0.27	2.25508e-05	2
HPS4	4.08119e-10	0.262991	0.399	0.207	2.27469e-05	2
ABL2	4.29344e-10	0.281375	0.576	0.352	2.39299e-05	2
PDE4DIP	4.61491e-10	0.30512	0.768	0.497	2.57216e-05	2
MAFB	4.67487e-10	0.261753	0.782	0.482	2.60559e-05	2
LY96	5.24778e-10	0.349533	0.664	0.395	2.9249e-05	2
HIBADH	5.4082e-10	0.375508	0.351	0.18	3.01432e-05	2
TPST2	5.96068e-10	0.323269	0.494	0.277	3.32224e-05	2
CLN5	6.4575e-10	0.281068	0.421	0.219	3.59915e-05	2
DBNDD2	6.6252e-10	0.350398	0.487	0.276	3.69262e-05	2
EGR2	7.38302e-10	0.339193	0.587	0.358	4.115e-05	2
AMPD3	7.9132e-10	0.250881	0.528	0.305	4.4105e-05	2
TM2D2	8.65654e-10	0.286306	0.513	0.288	4.82481e-05	2
SLC41A3	8.91822e-10	0.322533	0.269	0.119	4.97066e-05	2
DUSP23	9.03637e-10	0.323226	0.62	0.373	5.03651e-05	2
ING4	9.81451e-10	0.354016	0.41	0.222	5.47022e-05	2
CCPG1	1.02042e-09	0.287173	0.55	0.315	5.68743e-05	2
TMEM14C	1.02803e-09	0.335055	0.708	0.439	5.72984e-05	2
LYPLAL1	1.0304e-09	0.318931	0.351	0.176	5.74302e-05	2
DARS	1.15883e-09	0.318767	0.815	0.535	6.45887e-05	2
MRPL40	1.18308e-09	0.319799	0.48	0.276	6.59403e-05	2
DENND2D	1.38007e-09	0.254393	0.413	0.215	7.69196e-05	2
PIGT	1.39947e-09	0.318829	0.705	0.452	7.8001e-05	2
SDSL	1.41571e-09	0.341092	0.402	0.209	7.89063e-05	2
PRDM1	1.62439e-09	0.258604	0.69	0.428	9.05368e-05	2
ATP6V1D	1.78129e-09	0.319879	0.568	0.345	9.92822e-05	2
PNPO	1.78644e-09	0.299284	0.454	0.257	9.9569e-05	2
HCFC1R1	1.83437e-09	0.292531	0.561	0.338	0.00010224	2
RNF13	1.83914e-09	0.291442	0.9	0.621	0.000102506	2
SMIM19	1.85058e-09	0.312195	0.41	0.221	0.000103144	2
CCL4L1	1.86343e-09	0.338897	0.616	0.394	0.00010386	2
TMEM206	1.90574e-09	0.261562	0.406	0.217	0.000106218	2
WIPI1	1.95824e-09	0.315442	0.406	0.22	0.000109145	2
MPP1	2.1017e-09	0.280913	0.908	0.607	0.00011714	2
GDE1	2.11764e-09	0.282695	0.535	0.314	0.000118029	2
MMP19	2.1281e-09	0.257676	0.498	0.28	0.000118612	2
RNF14	2.17712e-09	0.266981	0.402	0.214	0.000121344	2
CLIC4	2.19903e-09	0.280416	0.664	0.422	0.000122565	2
TPD52L2	2.28607e-09	0.280284	0.849	0.572	0.000127416	2
HOOK2	2.28919e-09	0.273977	0.255	0.111	0.00012759	2
ID3	2.34307e-09	0.328677	0.362	0.185	0.000130593	2
CREBL2	2.44297e-09	0.267823	0.406	0.215	0.000136162	2
TMEM106C	2.51285e-09	0.328161	0.255	0.112	0.000140056	2
PRDX2	2.52358e-09	0.350091	0.649	0.389	0.000140654	2
SDCCAG8	2.53297e-09	0.277057	0.753	0.494	0.000141177	2
KDSR	2.72277e-09	0.280255	0.539	0.325	0.000151756	2
SMIM20	2.72519e-09	0.363575	0.413	0.225	0.000151891	2
FCGR1B	2.85847e-09	0.279795	0.76	0.494	0.00015932	2
SPATA20	2.87199e-09	0.298834	0.502	0.298	0.000160073	2
ENTPD6	2.8759e-09	0.273875	0.528	0.3	0.000160291	2
REXO2	2.88318e-09	0.341613	0.369	0.196	0.000160697	2
PTPLAD1	2.91559e-09	0.278002	0.314	0.154	0.000162503	2
PLD1	2.92725e-09	0.314498	0.336	0.17	0.000163153	2
MBD4	2.9762e-09	0.270179	0.531	0.306	0.000165881	2
SPARC	3.13518e-09	0.349468	0.255	0.114	0.000174742	2
ACO1	3.13568e-09	0.304914	0.399	0.221	0.00017477	2
ARHGEF10L	3.3578e-09	0.261694	0.657	0.415	0.00018715	2
RIN2	3.52128e-09	0.264917	0.849	0.557	0.000196262	2
MGMT	3.5465e-09	0.27032	0.395	0.212	0.000197668	2
ANXA4	3.59814e-09	0.316982	0.742	0.485	0.000200546	2
P4HA1	3.60744e-09	0.275536	0.793	0.544	0.000201064	2
SGPL1	3.69823e-09	0.280044	0.793	0.532	0.000206125	2
ATP6V0A1	3.71442e-09	0.271908	0.701	0.456	0.000207027	2
IFNAR1	3.81014e-09	0.277968	0.705	0.454	0.000212362	2
MYL6B	3.86933e-09	0.328877	0.325	0.17	0.000215661	2
RP11-6N17.6	4.01279e-09	0.281934	0.387	0.203	0.000223657	2
MT1F	4.39856e-09	0.333188	0.465	0.25	0.000245158	2
BSCL2	4.45974e-09	0.336932	0.458	0.26	0.000248568	2
KLHDC2	4.64779e-09	0.272136	0.365	0.188	0.000259049	2
C14orf159	4.88444e-09	0.262628	0.609	0.381	0.000272239	2
EEPD1	4.97672e-09	0.262902	0.292	0.135	0.000277382	2
PQLC3	5.18285e-09	0.303626	0.616	0.365	0.000288871	2
METTL5	5.37419e-09	0.341021	0.424	0.243	0.000299536	2
WRB	5.67339e-09	0.296809	0.273	0.128	0.000316212	2
AC000041.8	5.77896e-09	0.27717	0.314	0.15	0.000322096	2
GLUD1	6.11982e-09	0.279529	0.616	0.391	0.000341094	2
NCF4	6.19788e-09	0.253822	0.786	0.512	0.000345445	2
SCAMP1	6.32263e-09	0.296845	0.399	0.219	0.000352398	2
FAM20C	6.47096e-09	0.27326	0.351	0.182	0.000360665	2
C12orf4	7.39509e-09	0.267103	0.351	0.179	0.000412173	2
CBX1	7.44699e-09	0.271188	0.266	0.125	0.000415066	2
HSPA1B	8.08876e-09	0.273097	0.823	0.552	0.000450835	2
SESN1	8.10278e-09	0.315582	0.358	0.195	0.000451617	2
SRD5A3	9.09805e-09	0.337454	0.347	0.184	0.000507089	2
TTC1	9.1316e-09	0.291335	0.579	0.347	0.000508959	2
TP53I11	9.37143e-09	0.301908	0.52	0.314	0.000522326	2
TUBB2A	9.62675e-09	0.297856	0.31	0.153	0.000536557	2
WDR11	1.04142e-08	0.264265	0.55	0.347	0.000580444	2
STOM	1.06428e-08	0.329913	0.863	0.606	0.000593186	2
SNX6	1.10946e-08	0.296804	0.819	0.575	0.000618367	2
GOT2	1.1406e-08	0.300455	0.476	0.28	0.000635722	2
DHX29	1.14219e-08	0.263365	0.472	0.278	0.000636611	2
ACAT1	1.14658e-08	0.279286	0.524	0.307	0.000639057	2
NSL1	1.14804e-08	0.271648	0.421	0.231	0.000639874	2
TPM1	1.15294e-08	0.254962	0.273	0.128	0.000642602	2
RP11-294J22.6	1.15915e-08	0.26468	0.62	0.377	0.000646065	2
MRAS	1.18317e-08	0.275458	0.317	0.163	0.000659452	2
EDEM2	1.35569e-08	0.271154	0.605	0.38	0.00075561	2
NFU1	1.37701e-08	0.254568	0.354	0.183	0.00076749	2
SYPL1	1.37989e-08	0.317092	0.587	0.364	0.000769095	2
TECR	1.40327e-08	0.297792	0.738	0.478	0.000782124	2
ATRAID	1.41215e-08	0.315628	0.753	0.475	0.000787074	2
RPA1	1.42106e-08	0.256862	0.506	0.305	0.000792044	2
CNEP1R1	1.49771e-08	0.272214	0.506	0.293	0.000834764	2
SLC35F6	1.55215e-08	0.25947	0.919	0.662	0.000865108	2
RP11-357C3.3	1.61781e-08	0.272533	0.306	0.155	0.000901704	2
WI2-1896O14.1	1.62031e-08	0.318947	0.31	0.16	0.000903098	2
HIBCH	1.73905e-08	0.307665	0.325	0.17	0.000969274	2
MT1X	1.75772e-08	0.358405	0.546	0.315	0.000979685	2
TBC1D14	1.80575e-08	0.268041	0.506	0.304	0.00100645	2
ANKRD36B	1.82402e-08	0.297858	0.362	0.211	0.00101663	2
SLC31A1	1.87102e-08	0.288556	0.694	0.446	0.00104283	2
ASCC1	1.94715e-08	0.290679	0.373	0.21	0.00108527	2
CCL3	2.08153e-08	0.309365	0.834	0.573	0.00116016	2
GBA	2.13297e-08	0.276501	0.697	0.449	0.00118883	2
COMMD4	2.35043e-08	0.33542	0.45	0.26	0.00131004	2
PCK2	2.40953e-08	0.265828	0.561	0.342	0.00134298	2
IVD	2.42511e-08	0.305195	0.417	0.24	0.00135166	2
MAP1S	2.46734e-08	0.255422	0.624	0.392	0.00137519	2
GBE1	2.50357e-08	0.256013	0.458	0.278	0.00139539	2
GAA	2.54053e-08	0.295681	0.886	0.591	0.00141599	2
ISCU	2.67751e-08	0.306397	0.771	0.5	0.00149234	2
CLCC1	2.71723e-08	0.259484	0.369	0.207	0.00151448	2
PCBD1	2.9628e-08	0.312333	0.62	0.393	0.00165135	2
VOPP1	3.16441e-08	0.298166	0.649	0.426	0.00176372	2
ACOT13	3.23983e-08	0.280303	0.583	0.391	0.00180575	2
UROD	3.38523e-08	0.277285	0.531	0.322	0.00188679	2
MDP1	3.78485e-08	0.279807	0.317	0.164	0.00210952	2
SLC35B2	4.44984e-08	0.267846	0.402	0.226	0.00248016	2
BBS2	4.60147e-08	0.269122	0.269	0.129	0.00256468	2
SERPING1	4.68299e-08	0.318226	0.661	0.41	0.00261011	2
APH1A	4.93376e-08	0.251522	0.679	0.438	0.00274988	2
HSD17B12	5.08615e-08	0.26971	0.583	0.364	0.00283482	2
GALNT11	5.11626e-08	0.274631	0.376	0.215	0.0028516	2
AGA	5.46799e-08	0.302488	0.303	0.157	0.00304764	2
SNX8	5.64574e-08	0.256657	0.601	0.386	0.00314671	2
GALK2	6.38944e-08	0.262457	0.339	0.183	0.00356122	2
SLAMF8	6.76626e-08	0.330676	0.756	0.502	0.00377124	2
NDUFC1	6.91996e-08	0.293859	0.668	0.429	0.00385691	2
IL21R	6.93591e-08	0.288714	0.325	0.178	0.0038658	2
IL10	7.41686e-08	0.329224	0.321	0.165	0.00413386	2
ULK3	8.04026e-08	0.257704	0.292	0.146	0.00448132	2
MT1E	8.65273e-08	0.321031	0.446	0.257	0.00482268	2
ACADM	8.80274e-08	0.269469	0.424	0.25	0.0049063	2
C6orf1	9.33651e-08	0.277244	0.52	0.3	0.0052038	2
DPAGT1	9.35078e-08	0.264168	0.458	0.271	0.00521175	2
RAB13	1.08847e-07	0.285934	0.587	0.35	0.00606669	2
MCUR1	1.12504e-07	0.272473	0.336	0.189	0.00627053	2
TMED3	1.17902e-07	0.287487	0.572	0.363	0.00657138	2
IFT122	1.22586e-07	0.257468	0.251	0.124	0.00683247	2
NIT2	1.24168e-07	0.278827	0.498	0.306	0.0069206	2
MGME1	1.2709e-07	0.255968	0.317	0.174	0.00708346	2
GBAS	1.37402e-07	0.258068	0.661	0.429	0.00765822	2
SCPEP1	1.38359e-07	0.27113	0.841	0.565	0.00771155	2
PRRC1	1.40478e-07	0.253624	0.421	0.253	0.00782971	2
MPI	1.41669e-07	0.263392	0.339	0.19	0.00789606	2
ECI2	1.45948e-07	0.274989	0.306	0.165	0.00813456	2
ALG1	1.48442e-07	0.30417	0.317	0.179	0.00827354	2
ZNF664	1.50513e-07	0.274556	0.292	0.155	0.008389	2
IPO11	1.76592e-07	0.271995	0.262	0.133	0.00984253	2
LAIR1	1.8946e-07	0.277907	0.886	0.635	0.0105598	2
PSMB5	2.02702e-07	0.325526	0.609	0.382	0.0112978	2
CDKN2AIP	2.17846e-07	0.285157	0.284	0.15	0.0121419	2
METTL23	2.37832e-07	0.285998	0.483	0.294	0.0132558	2
FPR3	2.56402e-07	0.257531	0.742	0.492	0.0142908	2
TNFRSF12A	2.61355e-07	0.256348	0.314	0.171	0.0145669	2
PTPMT1	2.75309e-07	0.307981	0.572	0.364	0.0153446	2
DPCD	2.88064e-07	0.258068	0.284	0.15	0.0160555	2
RMDN1	2.91589e-07	0.26049	0.424	0.255	0.016252	2
GIMAP4	3.37344e-07	0.271826	0.697	0.448	0.0188022	2
RNASE6	3.74103e-07	0.287726	0.852	0.573	0.020851	2
PLOD3	3.96773e-07	0.260458	0.554	0.347	0.0221146	2
ARPC1A	4.19454e-07	0.257172	0.557	0.351	0.0233787	2
MEAF6	4.63766e-07	0.254512	0.583	0.379	0.0258484	2
ORMDL2	4.83778e-07	0.25242	0.627	0.404	0.0269639	2
STMN1	4.93389e-07	0.345871	0.306	0.168	0.0274995	2
UBR7	5.26902e-07	0.266574	0.339	0.195	0.0293674	2
HSD17B4	5.33219e-07	0.277636	0.664	0.448	0.0297195	2
DRAM2	5.4099e-07	0.291703	0.764	0.533	0.0301526	2
TMEM134	5.53565e-07	0.259108	0.48	0.291	0.0308535	2
TMEM147	5.98395e-07	0.284559	0.679	0.456	0.0333521	2
FAM20A	6.57498e-07	0.266828	0.413	0.261	0.0366463	2
PLA2G4C	7.0177e-07	0.272908	0.295	0.164	0.0391139	2
MCFD2	7.83229e-07	0.253572	0.483	0.307	0.0436541	2
TMUB1	8.1026e-07	0.301561	0.314	0.18	0.0451606	2
LINC00493	8.24321e-07	0.267692	0.546	0.348	0.0459444	2
BAD	8.27667e-07	0.250495	0.413	0.246	0.0461308	2
ATP6V0E2	8.79318e-07	0.257439	0.284	0.155	0.0490097	2
CTSA	1.42793e-06	0.255016	0.963	0.728	0.0795874	2
ZCRB1	1.56509e-06	0.29013	0.476	0.311	0.0872316	2
KANSL1-AS1	1.90965e-06	0.290675	0.251	0.135	0.106436	2
ATIC	2.15827e-06	0.270816	0.458	0.293	0.120293	2
ABHD3	2.17027e-06	0.25049	0.494	0.312	0.120962	2
DERA	2.26109e-06	0.25105	0.432	0.275	0.126024	2
KEAP1	2.68714e-06	0.250307	0.487	0.316	0.14977	2
IL7R	2.70948e-06	0.259668	0.391	0.244	0.151016	2
SMIM4	2.87882e-06	0.260524	0.332	0.202	0.160454	2
C4orf27	3.03066e-06	0.263913	0.317	0.188	0.168917	2
TNFSF13	3.64939e-06	0.259444	0.827	0.594	0.203403	2
VAMP3	4.55769e-06	0.25845	0.745	0.521	0.254027	2
PRDX4	5.96798e-06	0.258644	0.605	0.405	0.332631	2
AKR1A1	6.86151e-06	0.281114	0.882	0.621	0.382433	2
PPIL3	8.01766e-06	0.28194	0.303	0.175	0.446872	2
FCGR2B	9.01933e-06	0.25667	0.797	0.58	0.502701	2
MDH1	9.88588e-06	0.290959	0.797	0.529	0.550999	2
ACP5	1.24893e-05	0.284709	0.62	0.45	0.696105	2
PSMC2	1.27297e-05	0.256894	0.683	0.47	0.7095	2
TP53I13	1.31335e-05	0.260771	0.387	0.251	0.73201	2
LINC00116	1.50599e-05	0.259282	0.428	0.278	0.839377	2
SCP2	2.39468e-05	0.258214	0.801	0.577	1	2
MGLL	4.18445e-05	0.255609	0.306	0.182	1	2
MT1H	3.55835e-104	1.47083	0.721	0.091	1.98328e-99	3
MT1G	3.19198e-100	1.50345	0.812	0.145	1.77908e-95	3
CTB-147C22.3	7.33849e-97	1.00659	0.964	0.218	4.09018e-92	3
MSC	3.42389e-83	0.747902	0.421	0.021	1.90834e-78	3
NDP	7.30926e-83	0.808284	0.381	0.014	4.07389e-78	3
STAC	2.11862e-82	0.944283	0.609	0.077	1.18083e-77	3
CAMP	1.22741e-77	0.925649	0.386	0.018	6.84112e-73	3
MT1F	5.44139e-77	1.13531	0.832	0.203	3.03281e-72	3
AQP3	3.0775e-76	0.998547	0.533	0.06	1.71527e-71	3
RP11-383H13.1	7.9325e-76	0.701002	0.411	0.025	4.42126e-71	3
SLC28A3	1.8792e-73	0.615383	0.411	0.028	1.04739e-68	3
CLLU1OS	3.98521e-72	0.736165	0.32	0.009	2.2212e-67	3
PDLIM4	5.73261e-71	0.955422	0.558	0.077	3.19513e-66	3
CA12	9.43005e-70	0.551289	0.294	0.006	5.25594e-65	3
STEAP3	2.10002e-65	0.905219	0.812	0.213	1.17046e-60	3
MT1X	1.66736e-62	1.05955	0.888	0.272	9.29317e-58	3
MT1M	1.89537e-62	0.883678	0.538	0.083	1.0564e-57	3
MT1E	8.1861e-61	1.03491	0.797	0.21	4.5626e-56	3
INHBA	1.41763e-59	0.848671	0.528	0.077	7.90129e-55	3
GPR68	2.52869e-59	0.656241	0.396	0.041	1.40939e-54	3
MMP9	2.99981e-59	0.791482	0.701	0.167	1.67197e-54	3
MT1HL1	4.5976e-59	0.494484	0.325	0.02	2.56252e-54	3
RAB13	6.47186e-59	0.911423	0.934	0.307	3.60715e-54	3
MMP12	1.35289e-58	1.00487	0.36	0.031	7.54048e-54	3
CDA	1.79808e-58	0.796996	0.624	0.106	1.00218e-53	3
CYP27B1	1.32399e-55	0.68305	0.299	0.018	7.37941e-51	3
MT1L	3.18162e-55	0.871287	0.457	0.066	1.77331e-50	3
AC092484.1	3.37381e-54	1.01985	0.472	0.08	1.88042e-49	3
PTPRF	4.45438e-54	0.545002	0.34	0.03	2.48269e-49	3
CXCL5	4.88133e-54	0.81353	0.431	0.058	2.72066e-49	3
SULT1C2	1.76568e-53	0.713109	0.335	0.03	9.84121e-49	3
KCNJ15	6.76404e-53	0.622058	0.467	0.066	3.77e-48	3
RP11-603J24.7	1.19834e-51	0.558907	0.68	0.158	6.67907e-47	3
RP11-1008C21.1	2.28528e-51	0.9132	0.497	0.092	1.27372e-46	3
PDPN	1.42482e-50	0.851611	0.574	0.126	7.94137e-46	3
SMPDL3A	1.31549e-48	0.810058	0.812	0.242	7.33203e-44	3
SLC39A8	3.50767e-48	0.802704	0.873	0.3	1.95504e-43	3
QPCT	4.28477e-47	0.855286	0.863	0.254	2.38816e-42	3
MRC1	8.88065e-47	0.70792	0.858	0.29	4.94972e-42	3
IL7R	9.66813e-47	0.835242	0.695	0.203	5.38863e-42	3
FAIM2	4.37116e-46	0.60991	0.269	0.019	2.43631e-41	3
RP5-839B4.8	1.52609e-45	0.534498	0.254	0.016	8.50584e-41	3
DIXDC1	1.60799e-45	0.429228	0.294	0.026	8.96229e-41	3
MYC	2.1494e-45	0.733658	0.629	0.161	1.19799e-40	3
SLAMF1	3.07164e-45	0.630868	0.34	0.04	1.71201e-40	3
PRKCDBP	7.12125e-45	0.735341	0.543	0.119	3.9691e-40	3
PROCR	5.95613e-43	0.747505	0.594	0.152	3.31971e-38	3
MRC1L1	6.98574e-43	0.761729	0.949	0.381	3.89357e-38	3
CISH	2.2814e-42	0.763895	0.751	0.225	1.27156e-37	3
MT1P3	2.97662e-42	0.734372	0.396	0.066	1.65905e-37	3
FN1	5.8134e-42	0.896758	0.863	0.325	3.24016e-37	3
TSFM	6.57624e-42	0.74804	0.65	0.185	3.66533e-37	3
CRIM1	2.33795e-41	0.351244	0.447	0.086	1.30308e-36	3
SPR	2.43525e-41	0.692973	0.579	0.147	1.35731e-36	3
TSPAN7	2.69684e-41	0.548742	0.264	0.023	1.50311e-36	3
MT1JP	3.58564e-41	0.503573	0.365	0.056	1.99849e-36	3
ACO1	5.0636e-41	0.691144	0.635	0.192	2.82225e-36	3
C1orf122	3.02316e-40	0.658241	0.538	0.131	1.68499e-35	3
CLEC4D	7.54904e-40	0.552061	0.538	0.119	4.20754e-35	3
SPARC	3.67967e-39	0.819588	0.437	0.092	2.0509e-34	3
MLLT4	1.49027e-38	0.46589	0.508	0.12	8.30619e-34	3
METTL1	2.15099e-38	0.721287	0.487	0.111	1.19888e-33	3
LRP12	7.10415e-38	0.558488	0.437	0.091	3.95957e-33	3
AK4P1	1.5089e-37	0.52309	0.482	0.104	8.40999e-33	3
CDC42EP1	1.68577e-37	0.384471	0.513	0.119	9.39582e-33	3
MATK	2.38215e-37	0.555601	0.416	0.082	1.32771e-32	3
SPATA20P1	3.83777e-37	0.529941	0.294	0.036	2.13902e-32	3
F5	3.88856e-37	0.464736	0.376	0.064	2.16733e-32	3
CD274	8.40847e-37	0.666024	0.589	0.154	4.68654e-32	3
FBP1	1.52828e-36	0.652628	0.995	0.587	8.518e-32	3
ADAMDEC1	1.89875e-36	0.726077	0.426	0.088	1.05829e-31	3
MRTO4	2.56378e-36	0.558311	0.589	0.16	1.42895e-31	3
DENND6B	2.84988e-36	0.455128	0.594	0.158	1.58841e-31	3
MGAM	3.17633e-36	0.386601	0.416	0.086	1.77036e-31	3
WI2-1896O14.1	3.41562e-36	0.555774	0.533	0.132	1.90373e-31	3
CLEC5A	7.4025e-36	0.739991	0.904	0.358	4.12585e-31	3
AK4	9.3292e-36	0.616224	0.599	0.175	5.19972e-31	3
PDSS1	1.43613e-35	0.594403	0.396	0.078	8.0044e-31	3
SLC41A2	2.958e-35	0.635079	0.848	0.331	1.64867e-30	3
RP11-792D21.2	4.50331e-35	0.671787	0.726	0.242	2.50996e-30	3
ABCA6	6.4222e-35	0.467704	0.36	0.064	3.57948e-30	3
CA2	3.74224e-34	0.659918	0.574	0.162	2.08577e-29	3
MARCO	5.87885e-34	0.753486	0.98	0.419	3.27663e-29	3
ACE	6.27269e-34	0.469358	0.594	0.185	3.49615e-29	3
ACVRL1	6.52471e-34	0.587279	0.472	0.114	3.63661e-29	3
MMP14	3.27195e-33	0.530743	0.635	0.209	1.82366e-28	3
TMEM236	4.78529e-32	0.332498	0.401	0.088	2.66713e-27	3
ZMIZ1-AS1	1.62451e-31	0.379194	0.274	0.039	9.05436e-27	3
CLEC6A	1.97243e-31	0.553332	0.386	0.081	1.09935e-26	3
ARRDC4	5.65222e-31	0.392658	0.355	0.069	3.15032e-26	3
CLMN	8.95722e-31	0.43711	0.777	0.296	4.99239e-26	3
SH3PXD2B	1.83291e-30	0.435773	0.528	0.158	1.02159e-25	3
RP11-519G16.3	2.98286e-30	0.472066	0.569	0.16	1.66253e-25	3
TP53I11	3.61097e-30	0.583697	0.772	0.285	2.01261e-25	3
C19orf59	4.84418e-30	0.627157	0.701	0.222	2.69995e-25	3
CCL5	5.17701e-30	0.651299	0.594	0.21	2.88546e-25	3
MRPS2	5.70142e-30	0.587697	0.604	0.194	3.17774e-25	3
ABCC3	5.90792e-30	0.578421	0.721	0.261	3.29284e-25	3
TCF7L2	1.11601e-29	0.35267	0.726	0.258	6.22018e-25	3
EXOSC7	1.28124e-29	0.614551	0.69	0.237	7.14113e-25	3
EFTUD1	4.72313e-29	0.538564	0.574	0.181	2.63248e-24	3
MRPL12	6.67253e-29	0.607247	0.792	0.303	3.719e-24	3
METTL21B	1.33223e-28	0.46646	0.391	0.093	7.42533e-24	3
VWA8	1.39855e-28	0.317081	0.365	0.081	7.79497e-24	3
PRDX2	2.08809e-28	0.656253	0.863	0.369	1.16382e-23	3
RP11-556E13.1	2.16674e-28	0.483896	0.289	0.053	1.20766e-23	3
NLN	3.76223e-28	0.483808	0.528	0.158	2.09692e-23	3
MOB3B	4.29816e-28	0.47143	0.655	0.242	2.39562e-23	3
JUP	7.45074e-28	0.512105	0.599	0.198	4.15274e-23	3
IL27RA	8.84316e-28	0.53138	0.65	0.225	4.92882e-23	3
PCK2	1.01405e-27	0.564885	0.802	0.315	5.65192e-23	3
TRUB2	1.08866e-27	0.540291	0.492	0.145	6.06775e-23	3
ACOT7	1.34704e-27	0.576806	0.442	0.125	7.50785e-23	3
MREG	1.5568e-27	0.381078	0.274	0.046	8.67697e-23	3
DSC2	2.14394e-27	0.446167	0.716	0.278	1.19494e-22	3
PVT1	3.66756e-27	0.43138	0.548	0.175	2.04415e-22	3
ADAM12	4.64752e-27	0.324341	0.33	0.071	2.59034e-22	3
IL2RA	5.36821e-27	0.593518	0.497	0.153	2.99202e-22	3
KCNN4	8.2221e-27	0.57403	0.766	0.304	4.58267e-22	3
NRP1	1.62284e-26	0.586554	0.914	0.375	9.04507e-22	3
SEMA4B	1.98563e-26	0.476231	0.421	0.114	1.10671e-21	3
LPAR1	2.20765e-26	0.480111	0.462	0.135	1.23046e-21	3
CISD3	3.48166e-26	0.541846	0.66	0.239	1.94054e-21	3
KIFC3	3.56802e-26	0.432317	0.609	0.21	1.98867e-21	3
LINC00116	3.59923e-26	0.595486	0.675	0.247	2.00606e-21	3
PPARGC1B	5.23256e-26	0.374778	0.563	0.188	2.91642e-21	3
NT5C3B	5.75339e-26	0.50964	0.391	0.099	3.20671e-21	3
EXOSC4	6.29643e-26	0.573937	0.604	0.208	3.50938e-21	3
ANO10	9.25625e-26	0.498361	0.513	0.163	5.15906e-21	3
IL1A	1.15039e-25	0.46713	0.365	0.086	6.41179e-21	3
NRN1	1.55469e-25	0.388524	0.299	0.061	8.66521e-21	3
BDH1	1.72191e-25	0.396701	0.254	0.043	9.59726e-21	3
SERPINE1	1.9604e-25	0.379563	0.376	0.095	1.09265e-20	3
ME1	2.38742e-25	0.532205	0.462	0.136	1.33065e-20	3
TRAP1	2.52865e-25	0.578896	0.761	0.308	1.40937e-20	3
SLC2A6	3.51878e-25	0.551902	0.797	0.315	1.96123e-20	3
HAGHL	5.00382e-25	0.44031	0.396	0.105	2.78893e-20	3
PPM1N	5.01147e-25	0.461067	0.345	0.08	2.7932e-20	3
ATIC	5.0442e-25	0.572393	0.701	0.263	2.81143e-20	3
SFXN4	6.47231e-25	0.53477	0.513	0.164	3.6074e-20	3
MTHFD1	6.87231e-25	0.551346	0.66	0.248	3.83035e-20	3
MRPL15	8.49736e-25	0.591503	0.746	0.294	4.73609e-20	3
CCDC25	1.35786e-24	0.517996	0.513	0.169	7.56819e-20	3
WDR12	1.52768e-24	0.537187	0.477	0.149	8.51468e-20	3
EGR2	1.61865e-24	0.56969	0.792	0.338	9.02169e-20	3
MRPL34	1.66195e-24	0.563054	0.787	0.315	9.26306e-20	3
SLC38A6	1.84684e-24	0.521271	0.716	0.281	1.02935e-19	3
PFKFB4	2.38247e-24	0.408005	0.655	0.231	1.3279e-19	3
FGD5	3.57244e-24	0.371469	0.35	0.088	1.99114e-19	3
MKKS	4.0512e-24	0.509085	0.777	0.317	2.25797e-19	3
DHRS4L2	4.82137e-24	0.512554	0.807	0.353	2.68724e-19	3
FAM198B	5.09658e-24	0.450094	0.736	0.304	2.84063e-19	3
AFAP1	5.18888e-24	0.360008	0.33	0.081	2.89207e-19	3
CLEC4E	5.8029e-24	0.503322	0.802	0.295	3.23431e-19	3
PDE4DIP	7.72128e-24	0.522121	0.934	0.486	4.30353e-19	3
PLEKHA7	8.11327e-24	0.392235	0.279	0.055	4.52201e-19	3
PEMT	9.59773e-24	0.556271	0.472	0.149	5.34939e-19	3
BZW2	1.41257e-23	0.552817	0.69	0.264	7.8731e-19	3
FAM213A	1.4415e-23	0.464745	0.457	0.14	8.03435e-19	3
PPIC	1.49357e-23	0.53545	0.365	0.1	8.32457e-19	3
MTFP1	1.61672e-23	0.565466	0.604	0.225	9.01097e-19	3
CDK5	1.71021e-23	0.49322	0.553	0.191	9.53205e-19	3
RP11-159J3.1	2.75053e-23	0.305236	0.787	0.34	1.53304e-18	3
LTBP2	3.9642e-23	0.288181	0.299	0.067	2.20948e-18	3
FLT1	4.21566e-23	0.382473	0.315	0.075	2.34964e-18	3
NDUFA8	6.90355e-23	0.54099	0.761	0.31	3.84776e-18	3
RP13-452N2.1	8.30562e-23	0.371407	0.34	0.084	4.62922e-18	3
EEF2K	1.39119e-22	0.385107	0.589	0.219	7.75393e-18	3
SEPN1	2.05849e-22	0.287415	0.497	0.175	1.14732e-17	3
CCR2	2.16241e-22	0.529891	0.543	0.184	1.20524e-17	3
FH	2.21017e-22	0.513943	0.665	0.265	1.23186e-17	3
ASB13	2.52755e-22	0.399878	0.421	0.123	1.40875e-17	3
ARHGEF10L	3.09042e-22	0.444055	0.858	0.397	1.72247e-17	3
KANSL1-AS1	3.52258e-22	0.506908	0.401	0.117	1.96335e-17	3
ATP2C1	3.78663e-22	0.482473	0.802	0.372	2.11052e-17	3
FAM195A	4.15598e-22	0.450738	0.513	0.174	2.31638e-17	3
GBGT1	4.31358e-22	0.476607	0.67	0.263	2.40422e-17	3
NIT2	4.57031e-22	0.515662	0.69	0.286	2.54731e-17	3
MRPS35	4.86284e-22	0.527012	0.746	0.311	2.71035e-17	3
SDC4	4.94562e-22	0.443023	0.817	0.356	2.75649e-17	3
NOB1	5.22238e-22	0.474975	0.553	0.19	2.91075e-17	3
ZNF783	6.39471e-22	0.316832	0.36	0.097	3.56416e-17	3
MINA	6.50408e-22	0.450608	0.538	0.192	3.62512e-17	3
ARL2BP	6.7454e-22	0.495547	0.563	0.205	3.75962e-17	3
SFXN1	8.39457e-22	0.440025	0.655	0.265	4.6788e-17	3
FAM162A	8.72313e-22	0.516688	0.843	0.351	4.86192e-17	3
CD101	9.76935e-22	0.369422	0.36	0.092	5.44505e-17	3
MINPP1	1.11182e-21	0.42955	0.431	0.137	6.19686e-17	3
XIST	1.44069e-21	0.351171	0.985	0.442	8.02981e-17	3
SLC37A2	1.60302e-21	0.509662	0.853	0.396	8.9346e-17	3
DNAJC11	1.65677e-21	0.434773	0.609	0.23	9.23419e-17	3
SPRED1	1.75617e-21	0.348474	0.579	0.218	9.78819e-17	3
HMBS	1.80882e-21	0.486475	0.538	0.192	1.00816e-16	3
AP001007.1	2.37535e-21	0.444732	0.751	0.328	1.32392e-16	3
IFRD2	2.4342e-21	0.531222	0.645	0.253	1.35673e-16	3
DCUN1D5	2.63216e-21	0.463837	0.569	0.212	1.46706e-16	3
RGS16	2.69564e-21	0.405873	0.35	0.094	1.50244e-16	3
CHCHD10	2.77284e-21	0.342722	0.386	0.11	1.54547e-16	3
SNHG17	2.8866e-21	0.499519	0.66	0.264	1.60887e-16	3
PAICS	4.40769e-21	0.4887	0.64	0.266	2.45667e-16	3
SRPRB	4.57514e-21	0.469974	0.731	0.317	2.55e-16	3
ISOC2	4.65567e-21	0.481644	0.492	0.169	2.59488e-16	3
CELSR1	4.81983e-21	0.287112	0.274	0.063	2.68638e-16	3
TLR8	4.84967e-21	0.401574	0.629	0.257	2.70301e-16	3
ACAD8	5.08443e-21	0.418053	0.457	0.147	2.83386e-16	3
NCEH1	5.16928e-21	0.437031	0.766	0.335	2.88115e-16	3
KAT8	5.57707e-21	0.409184	0.431	0.135	3.10843e-16	3
C6orf211	5.63885e-21	0.495602	0.67	0.275	3.14287e-16	3
PLXNA1	6.60932e-21	0.368414	0.589	0.236	3.68377e-16	3
SLC9A7P1	6.72019e-21	0.414205	0.299	0.075	3.74557e-16	3
TOMM40	6.86507e-21	0.27733	0.442	0.139	3.82631e-16	3
FLVCR2	7.1491e-21	0.462361	0.701	0.284	3.98462e-16	3
FXN	7.31225e-21	0.472741	0.386	0.117	4.07556e-16	3
VAMP4	7.72245e-21	0.397731	0.538	0.189	4.30419e-16	3
PVR	8.75402e-21	0.419373	0.482	0.169	4.87914e-16	3
ACY1	8.86374e-21	0.493174	0.477	0.164	4.94029e-16	3
MRPS26	9.28179e-21	0.477676	0.594	0.224	5.1733e-16	3
MTX1	9.372e-21	0.481169	0.711	0.302	5.22358e-16	3
HCFC1R1	1.00849e-20	0.421435	0.741	0.322	5.62092e-16	3
BHLHE41	1.00924e-20	0.383275	0.371	0.107	5.62511e-16	3
ADK	1.03942e-20	0.451581	0.635	0.258	5.7933e-16	3
ST6GALNAC4	1.07036e-20	0.471948	0.497	0.177	5.96573e-16	3
NR1H3	1.07758e-20	0.51532	0.589	0.231	6.00598e-16	3
COQ9	1.16207e-20	0.498495	0.563	0.211	6.47691e-16	3
PARM1	1.3154e-20	0.259359	0.33	0.085	7.33149e-16	3
CD82	1.33972e-20	0.481093	0.838	0.393	7.46706e-16	3
MCM4	1.4617e-20	0.492475	0.381	0.119	8.14692e-16	3
TEKT4P2	1.47864e-20	0.339435	0.381	0.119	8.24132e-16	3
FAM200B	1.4827e-20	0.478811	0.538	0.195	8.264e-16	3
ACVR2A	1.75637e-20	0.438749	0.482	0.179	9.78929e-16	3
CMAS	2.60474e-20	0.467311	0.497	0.174	1.45178e-15	3
RP11-353N4.1	2.61931e-20	0.302082	0.289	0.069	1.4599e-15	3
MITF	2.82679e-20	0.425755	0.695	0.288	1.57554e-15	3
TSPAN3	2.85954e-20	0.526799	0.893	0.414	1.59379e-15	3
GGT5	2.89182e-20	0.473761	0.259	0.055	1.61178e-15	3
LINC00998	3.66954e-20	0.494603	0.69	0.283	2.04525e-15	3
TIMM21	5.51373e-20	0.477935	0.396	0.127	3.07313e-15	3
DCUN1D3	6.21387e-20	0.271757	0.558	0.214	3.46336e-15	3
ZNF589	6.23797e-20	0.324348	0.345	0.097	3.47679e-15	3
IMP3	6.33032e-20	0.466556	0.766	0.336	3.52827e-15	3
RHBDD2	6.53631e-20	0.481461	0.812	0.375	3.64308e-15	3
PET112	6.60208e-20	0.451214	0.462	0.159	3.67974e-15	3
PET117	7.20046e-20	0.416759	0.365	0.109	4.01325e-15	3
MRPL17	7.30746e-20	0.474234	0.706	0.282	4.07288e-15	3
VPS37C	7.351e-20	0.281597	0.558	0.218	4.09715e-15	3
DUSP14	7.88104e-20	0.358734	0.264	0.058	4.39258e-15	3
DHRS4	1.1039e-19	0.490126	0.802	0.365	6.1527e-15	3
EBNA1BP2	1.22904e-19	0.501014	0.65	0.266	6.85019e-15	3
PAPSS1	1.38479e-19	0.504702	0.883	0.419	7.71829e-15	3
NABP2	1.49937e-19	0.422133	0.487	0.175	8.35691e-15	3
PFKM	1.51558e-19	0.366763	0.325	0.088	8.44726e-15	3
MYEOV2	1.57936e-19	0.453921	0.65	0.257	8.80273e-15	3
BCAT2	1.58902e-19	0.427304	0.426	0.141	8.85657e-15	3
ITPR2	1.59903e-19	0.390165	0.888	0.449	8.91234e-15	3
MRPL2	1.5993e-19	0.465221	0.523	0.193	8.91385e-15	3
PROS1	1.61132e-19	0.439594	0.345	0.104	8.98086e-15	3
MRPS12	2.04204e-19	0.441618	0.655	0.258	1.13815e-14	3
C21orf59	2.102e-19	0.445896	0.518	0.193	1.17157e-14	3
NEK6	2.15295e-19	0.484075	0.949	0.5	1.19997e-14	3
LPIN3	2.94721e-19	0.28039	0.32	0.086	1.64266e-14	3
GTF2E1	3.12605e-19	0.347586	0.36	0.107	1.74233e-14	3
EXOSC5	3.52099e-19	0.448407	0.513	0.182	1.96246e-14	3
AQP9	4.0603e-19	0.350277	0.904	0.385	2.26305e-14	3
TOMM5	4.68149e-19	0.49306	0.822	0.368	2.60928e-14	3
AP1S1	4.69892e-19	0.295549	0.462	0.16	2.61899e-14	3
CLPP	5.08232e-19	0.490589	0.685	0.291	2.83268e-14	3
SHPK	5.38812e-19	0.255905	0.421	0.142	3.00312e-14	3
BOLA3	5.42812e-19	0.517134	0.518	0.204	3.02541e-14	3
GPATCH4	5.99548e-19	0.4222	0.442	0.153	3.34164e-14	3
PRADC1	6.00218e-19	0.444765	0.421	0.139	3.34537e-14	3
C19orf48	6.60534e-19	0.483182	0.462	0.166	3.68155e-14	3
TMEM251	8.00917e-19	0.459778	0.477	0.174	4.46399e-14	3
HDHD1	8.21292e-19	0.420203	0.426	0.145	4.57755e-14	3
C1RL	8.44978e-19	0.346224	0.406	0.135	4.70957e-14	3
RP5-1043L13.1	8.79959e-19	0.311828	0.284	0.075	4.90454e-14	3
AC009469.1	8.89349e-19	0.381616	0.452	0.155	4.95687e-14	3
TCEAL8	9.2261e-19	0.462853	0.543	0.208	5.14226e-14	3
SURF6	1.0066e-18	0.361157	0.518	0.194	5.61039e-14	3
GCSH	1.13264e-18	0.389826	0.33	0.093	6.31288e-14	3
PCCB	1.37422e-18	0.41232	0.67	0.293	7.65938e-14	3
TIMM10	1.42251e-18	0.486217	0.65	0.268	7.92849e-14	3
PDCD1LG2	1.47009e-18	0.411462	0.381	0.121	8.1937e-14	3
ALG3	1.61956e-18	0.469097	0.685	0.291	9.02678e-14	3
ZNF593	1.70313e-18	0.341082	0.497	0.182	9.49256e-14	3
PCBD1	1.7087e-18	0.488704	0.832	0.372	9.52362e-14	3
TNS1	1.73471e-18	0.415606	0.827	0.381	9.66858e-14	3
BCAT1	1.99461e-18	0.422355	0.909	0.478	1.11171e-13	3
WDR3	2.05812e-18	0.380849	0.33	0.099	1.14711e-13	3
TNS3	2.13149e-18	0.427361	0.939	0.501	1.18801e-13	3
AASDHPPT	2.42665e-18	0.448653	0.563	0.227	1.35252e-13	3
CECR5	2.88253e-18	0.450889	0.792	0.353	1.60661e-13	3
PTGR1	2.89726e-18	0.458112	0.442	0.162	1.61482e-13	3
RP11-977G19.10	2.92498e-18	0.3921	0.447	0.167	1.63027e-13	3
NUDT19	3.24729e-18	0.430318	0.787	0.359	1.80991e-13	3
GGCT	3.27821e-18	0.459739	0.574	0.231	1.82714e-13	3
AHCY	3.35736e-18	0.476617	0.716	0.333	1.87126e-13	3
SRM	3.45021e-18	0.372418	0.355	0.108	1.92301e-13	3
SPINT1	3.65228e-18	0.419081	0.594	0.236	2.03564e-13	3
FHL3	3.89324e-18	0.387537	0.538	0.2	2.16994e-13	3
FAHD1	3.90544e-18	0.365004	0.462	0.164	2.17673e-13	3
SPN	4.28227e-18	0.367691	0.695	0.303	2.38676e-13	3
MINOS1-NBL1	4.40048e-18	0.262623	0.665	0.318	2.45265e-13	3
MYBBP1A	4.57845e-18	0.303063	0.635	0.269	2.55185e-13	3
RNF41	5.12821e-18	0.385478	0.533	0.208	2.85826e-13	3
HDDC2	5.28318e-18	0.430845	0.472	0.169	2.94464e-13	3
COG2	5.34384e-18	0.356401	0.513	0.2	2.97844e-13	3
CCDC57	5.66281e-18	0.303863	0.518	0.192	3.15622e-13	3
ACOX1	6.23443e-18	0.359597	0.741	0.352	3.47482e-13	3
[truncated: 5,806 more rows]

## Sheet: TAM_Gene_Sets
IFN-TAMs	Inflam-TAM	LA-TAM	Angio-TAM	Reg-TAM	Prolif-TAM	RTM-TAM	Macrophages M2	Macrophages M1	Macrophages M0	Monocytes
CASP1	CCL2	ACP5	ADAM8	CCL2	CCNA2	C1QA	ADAMDEC1	ADAMDEC1	ADAMDEC1	SLC15A3
CASP4	CCL3	APOE	AREG	CD274	CDC45	C1QB	CHI3L1	CHI3L1	CHI3L1	AQP9
CCL2	CCL4	APOC1	BNIP3	CD40	CDK1	C1QC	SLC15A3	SLC15A3	SLC15A3	CD68
CCL3	CCL5	ATF1	CCL2	CD80	H2AFC	CCL7	CCL18	CCL8	AQP9	FAM198B
CCL4	CCL20	C1QA	CCL4	CD86	HIST1H4C	CD163	CD68	CLIC2	CCL18	C5AR1
CCL7	CCL3L1	C1QB	CCL20	CHIT1	HMGB1	CD5L	FAM198B	EBI3	CD68	HK3
CCL8	CCL3L3	C1QC	CD163	CX3CR1	HMGN2	CD74	TREM2	GGT5	FAM198B	IGSF6
CD274	CCL4L2	CCL18	CD300E	HLA-A	MKI67	CETP	CCL8	SIGLEC1	TREM2	NCF2
CD40	CCL4L4	CD163	CD44	HLA-C	RRM2	FOLR2	CLIC2	TLR8	ACP5	VNN1
CXCL2	CXCL1	CD36	CD55	HLA-DQA1	STMN1	HLA-DPA1	EBI3	AQP9	BHLHE41	TLR8
CXCL3	CXCL2	CD63	CEBPB	HLA-B1	TOP2A	HLA-DPB1	GGT5	ACHE	C5AR1	APOBEC3A
CXCL9	CXCL3	CHI3L1	CLEC5A	HLA-DRA	TUBA1B	HLA-DRB1	SIGLEC1	APOBEC3A	CCDC102B	LILRA3
CXCL10	CXCL5	CTSB	CTSB	HLA-B1	TUBB	MACRO	TLR8	APOL3	CCL22	LILRB2
CXCL11	CXCL8	CTSD	EREG	HLA-B5	TYMS	MAF	AIF1	APOL6	CCL7	NOD2
IDO1	G0S2	CTSL	FCN1	ICOSLG		MS4A7	ALOX15	ARRB1	COL8A2	TLR7
IFI6	IL1B	F13A1	FLT1	IL-10		SLC40A1	CCL13	CCL19	CSF1	AIF1
IFIT1	IL1RN	FABP5	FN1	ITGA4		VCAM1	CCL14	CCL5	CXCL3	CFP
IFIT2	IL6	FOLR2	HES1	LGALS9		VSIG4	CCL23	CCR7	CXCL5	CLEC4A
IFIT3	INHBA	GPNMB	IL1B	MACRO		CCL18	CD209	CD38	CYP27A1	FES
IFITM1	KLF2	IRF3	IL1RN	MRC1		CCL23	CD4	CD40	DCSTAMP	FZD2
IFITM3	KLF6	LGALS3	IL8	TGFB2		CD52	CFP	CXCL10	GPC4	MS4A6A
IRF1	NEDD9	LIPA	MAF			FABP4	CLEC10A	CXCL11	HK3	P2RY13
IRF7	PMAIP1	LPL	MIF			FBP1	CLEC4A	CXCL13	IGSF6	ASGR1
ISG15	S100A8	MACRO	NR1H3			LGALS3	CRYBB1	CXCL9	MARCO	ASGR2
LAMP3	S100A9	MerTK	OLR1			MACRO	FES	CYP27B1	MMP9	BST1
PDCD1LG2	SPP1	MMP7	PPARG			MCEMP1	FRMD4A	DHX58	NCF2	CCR2
TNFSF10		MMP9	S100A8			MRC1	FZD2	HESX1	PLA2G7	CD1D
C1QA/C		MMP12	S100A9			MSR1	GSTT1	IDO1	PPBP	CD33
CD38		MRC1	S100A12			PPARG	HRH1	IFI44L	QPCT	CDA
IL4I1		NR1H3	SERPINB2			RBP4	HTR2B	IL2RA	SLAMF8	CHST15
ISG15		NRF1	SLC2A1			BIN1	MS4A6A	KIAA0754	SLC12A8	CLEC7A
TNFSF10		NUPR1	SPIC			C1QC	NME8	KYNU	TNFSF14	CREB5
IFI44L		PLA2G7	SPP1			CX3CR1	NPL	LAG3	VNN1	CSF3R
		RNASE1	THBS1			NAV3	P2RY13	LAMP3		FCN1
		SPARC	TIMP1			P2RY12	PDCD1LG2	LILRA3		FOSB
		SPP1	VCAN			SALL1	RENBP	LILRB2		FPR1
		TFDP2	VEGFA			SIGLEC8	WNT5B	NOD2		HCK
		TREM2				SLC1A3		PLA1A		HNMT
		ZEB1				MT1E		PTGIR		HPSE
						MT2A		RASSF4		LILRA2
						MTG1E		RSAD2		LST1
						CXCL9		SLAMF1		MEFV
						GBP1		SLC2A6		MNDA
						IFITM3		SOCS1		NFE2
						LGALS2		TLR7		NLRP3
						PARP14		TNFAIP6		PADI4
						SLC30A1		TNIP3		RNASE2
						SLC39A8		TRPM4		RNASE6
						STAT1				S100A12
						TNFSF13B				TLR2
						FLOR2				UPK3A
						LYVE1				VNN2
						PLTP
						SEPP1

## Sheet: Pre_treatment_Responder_vs_nonR
variable	.y.	group1	group2	n1	n2	statistic	p	p.adj	p.adj.signif
IFN_TAMs_UCell	value	Non-responder	Responder	1239	138	119219	0.00271	0.2981	ns
Inflam_TAM_UCell	value	Non-responder	Responder	1239	138	121560	0.00395	0.4345	ns
LA_TAM_UCell	value	Non-responder	Responder	1239	138	116755	1.72e-12	1.892e-11	****
Angio_TAM_UCell	value	Non-responder	Responder	1239	138	79194.5	0.066	0.726	ns
Reg_TAM_UCell	value	Non-responder	Responder	1239	138	107878	0.0623	0.0929	ns
Prolif_TAM_UCell	value	Non-responder	Responder	1239	138	87492	0.0695	0.7645	ns
RTM_TAM_UCell	value	Non-responder	Responder	1239	138	122096	0.0145	0.1595	ns
Macrophages.M2_UCell	value	Non-responder	Responder	1239	138	108383	0.0239	0.2629	ns
Macrophages.M1_UCell	value	Non-responder	Responder	1239	138	105744	0.000487	0.05357	ns
Macrophages.M0_UCell	value	Non-responder	Responder	1239	138	127186	0.0347	0.4756	ns
Monocytes_UCell	value	Non-responder	Responder	1239	138	97252	0.00795	0.08745	ns

## Sheet: Pre_Post_NR
variable	.y.	group1	group2	n1	n2	p	p.adj	p.adj.signif	Condition	Response Group
IFN_TAMs_UCell	value	Post	Pre	878	361	4.22e-05	0.0004642	****	Post vs. Pre	NR
Inflam_TAM_UCell	value	Post	Pre	878	361	0.0928	1	ns	Post vs. Pre	NR
LA_TAM_UCell	value	Post	Pre	878	361	2.32e-08	2.552e-12	****	Post vs. Pre	NR
Angio_TAM_UCell	value	Post	Pre	878	361	1	1	ns	Post vs. Pre	NR
Reg_TAM_UCell	value	Post	Pre	878	361	1	1	ns	Post vs. Pre	NR
Prolif_TAM_UCell	value	Post	Pre	878	361	0.0101	0.1111	ns	Post vs. Pre	NR
RTM_TAM_UCell	value	Post	Pre	878	361	0.0199	0.2189	ns	Post vs. Pre	NR
Macrophages.M2_UCell	value	Post	Pre	878	361	0.0187	0.2057	ns	Post vs. Pre	NR
Macrophages.M1_UCell	value	Post	Pre	878	361	1	1	ns	Post vs. Pre	NR
Macrophages.M0_UCell	value	Post	Pre	878	361	0.0423	0.4653	ns	Post vs. Pre	NR
Monocytes_UCell	value	Post	Pre	878	361	0.955	1	ns	Post vs. Pre	NR
