# Supplementary material
Source: Research Square preprint supplement (doi:10.21203/rs.3.rs-9692259/v1)
Supplement: Supplementary file 5 [file 473696b4941eba4c62deb322.xlsx]

## Sheet: Antibody_panel
Metal	Target	Clone	Company	Catalogue #
113In	CD68	KP1	BioLegend	916104
115In	HLA-DR	TAL-1B5	abcam	ab176408
141Pr	SMA	1A4	Fluidigm	3141017D
142Nd	CD15	HI98	Biolegend	301902
143Nd	CTLA4	SP355	abcam	ab238271
144Nd	CD14	2C1D9	Proteintech	60253-1-Ig
145Nd	CD3e	D7A6E	CST	24581SF
146Nd	Ki-67	B56	BD	556003
147Sm	CD163	EDhu-1	Fluidigm	MA1-82342
148Nd	PanKeratin	C11	CST	17171SF
149Sm	CD11b	EPR1344	Fluidigm	3149028D
150Nd	PD-L1	E1L3N	CST	13684BF
151Eu	CD31	EPR1344	abcam	ab209970
152Sm	CCL4	AA 26-92	antibodies online	ABIN740805
153Eu	TREM2	2B5	Novus biologicals	NBP1-07101
154Sm	Tim-3	D5D5R	CST	45208BF
155Gd	FoxP3	236A/E7	Thermo fisher	14-4777-82
156Gd	CD4	EPR6855	abcam	ab181724
157Gd	Lag-3	EPR4392(2)	abcam	ab209740
158Gd	TIGIT	BLR047F	abcam	ab243903
159Tb	CD11c	EP1347Y	abcam	ab216655
160Gd	T-bet	4B10	BioLegend	644802
161Dy	CD20	H1	BioLegend	302302
162Dy	CD8a	C8/144B	BioLegend	372902
163Dy	VEGF	G153-694	Fluidigm	3163028D
164Dy	CytC	7H8.2C12	Novus biologicals	NBP2-80686
165Ho	PD-1	D4W2J	CST	86163BF
166Er	CD204	J5HTR3	Invitrogen	14-9054-82
167Er	GranzymeB	EPR20129-217	abcam	ab219803
168Er	CCL2	AA 61-148	antibodies online	ABIN737676
169Tm	Collagen	Poly	fluidigm	3169023D
170Er	CD103	EPR22590-27	abcam	EPR22590-27
171Yb	APOE	A17065A	BioLegend	852802
172Yb	CD38	EPR4106	abcam	ab176886
173Yb	CD45RO	UCHL1	BioLegend	304202
174Yb	S100	EPR19013	abcam	ab227580
175Lu	CD34	EPR373Y	abcam	ab198395
194Pt	HH3	D1H2	CST	4499BF
195Pt	Vimentin	D21H3	CST	46173SF
196Pt	E-cadherin	4A2	abcam	ab231303
89Y	CD45	D9M8I	CST	13917BF
