# Supplementary material
Source: Research Square preprint supplement (doi:10.21203/rs.3.rs-9692259/v1)
Supplement: Supplementary file 6 [file 6efe476dc15071503c303f07.xlsx]

## Sheet: Patient_info
Patient ID	Initial response to ICI	type of ICI	Metastasis	type of tumor material	weight (kg) at ICI start	BMI
UKF#1	No	Pembro	Yes	LN macro met	62	22.23
UKF#2	No	Nivo	Yes	Primary	123	35.55
UKF#3	No	Nivo/Ipi	Yes	s.c. Met	102	27.96
UKF#4	Yes	Nivo/Ipi	Yes	s.c. Met	89	30.08
UKF#5	Yes	Nivo/Ipi	Yes	s.c. Met	72	24.06
UKF#6	Yes	Nivo/Ipi	Yes	s.c. Met	63	21.8
Patient ID	type of ICI	best response (CR, PR, SD, PD)	second line treatment	best response under second line treatment	third line treatment	best response to third line therapy	fourth line treatment	best response to fourth line therapy	fifth line treatment	best response to fifth line therapy	sixth line therapy	best response to sixth line therapy
UKF #1	Pembro	PD	Nivolumab/Ipilimumab	PD	DTIC	PD	Pembrolizumab + Lenvatinib	PD	NA	NA	NA	NA
UKF #2	Nivo	PD	Nivolumab/Ipilimumab	PD	Nivolumab	PD	DTIC	PD	Pembrolizumab + Lenvatinib	PD	NA	NA
UKF #3	Nivo/Ipi	PD	DTIC	SD	Pembrolizumab + Lenvatinib	PD	NA	NA	NA	NA	NA	NA
UKF #4	Nivo/Ipi	PR	Nivolumab + intralesional IL-2	PD	radiotherapy of porgressive left cervical Lymphnodes	PD	radiotherapy of BWK-6 metastasis	PR	surgical Korporektomie BWK 6	SD	Encorafenib/Binimetinib	SD
UKF #5	Nivo/Ipi	PR	Pembrolizumab + Lenvatinib	SD	NA	NA	NA	NA	NA	NA	NA	NA
UKF #6	Nivo/Ipi	PR	NA	NA	NA	NA	NA	NA	NA	NA	NA	NA

## Sheet: stRNA-seq_QC
Before Filtering				After Filtering
Sample	Spots	Median genes per spot	Mean reads per spot	Spots	Total gene count
UKF#1	1961	2094	70354	1756	5155
UKF#2	1542	1390	90161	1376	7407
UKF#3	3184	2434	37890	3172	8546
UKF#4	3567	1855	29136	2898	9412
UKF#5	2470	4068	58471	2470	6308
UKF#6	3598	3350	35236	2899	10021

## Sheet: UKF1_DEG
p_val	avg_log2FC	pct.1	pct.2	p_val_adj	bayes_space	gene
4.13967e-07	1.34564	0.125	0.048	0.00213359	1	APMAP
4.26561e-10	1.16521	0.22	0.092	2.1985e-06	1	GCLC
9.04724e-11	1.12597	0.247	0.106	4.66295e-07	1	VHL
2.55089e-07	1.09795	0.166	0.072	0.00131473	1	ADCK2
1.58731e-09	1.08578	0.224	0.097	8.18098e-06	1	TMEM11
7.43092e-07	1.0799	0.2	0.099	0.0038299	1	CNEP1R1
2.56579e-12	1.07787	0.319	0.146	1.32241e-08	1	NUDCD2
2.29043e-08	1.07588	0.241	0.118	0.000118049	1	INTS14
1.12194e-10	1.05578	0.224	0.09	5.78246e-07	1	CIB2
1.23514e-07	1.05126	0.183	0.081	0.000636589	1	RPP25L
7.26233e-09	1.04793	0.254	0.124	3.743e-05	1	SRSF6
3.03506e-11	1.03871	0.322	0.157	1.56427e-07	1	DYM
2.27761e-11	1.03414	0.298	0.137	1.17388e-07	1	FADS1
4.04924e-08	1.03165	0.217	0.101	0.000208698	1	FBXL20
7.82948e-11	1.02806	0.305	0.146	4.03532e-07	1	POLR3F
2.38962e-09	1.01444	0.275	0.134	1.23161e-05	1	RYBP
1.78216e-09	0.997829	0.241	0.108	9.18525e-06	1	WASF1
7.89051e-15	0.994753	0.393	0.182	4.06677e-11	1	ATP6AP2
1.11712e-07	0.994509	0.217	0.105	0.000575763	1	PDLIM4
6.88779e-11	0.992527	0.281	0.127	3.54997e-07	1	SOCS5
2.9378e-09	0.992142	0.288	0.145	1.51414e-05	1	RSU1
6.31303e-10	0.989562	0.268	0.124	3.25374e-06	1	REXO4
6.40221e-09	0.989487	0.271	0.135	3.2997e-05	1	LDLR
4.27773e-10	0.986241	0.271	0.125	2.20474e-06	1	RPRD1A
3.12761e-11	0.986241	0.322	0.155	1.61197e-07	1	HTATSF1
6.02893e-08	0.986241	0.21	0.097	0.000310731	1	COA7
4.75163e-07	0.981359	0.186	0.088	0.00244899	1	NAT14
1.91938e-09	0.96969	0.298	0.152	9.89247e-06	1	NR4A3
1.27389e-16	0.969367	0.502	0.255	6.56563e-13	1	L1CAM
3.49581e-09	0.963341	0.298	0.153	1.80174e-05	1	PHF3
8.82792e-07	0.959441	0.2	0.099	0.00454991	1	ANTXR1
6.95627e-09	0.954532	0.275	0.138	3.58526e-05	1	CCNB1IP1
1.46287e-10	0.951336	0.302	0.144	7.53964e-07	1	CMBL
3.73449e-08	0.94758	0.251	0.125	0.000192475	1	CKAP2
2.25399e-13	0.944357	0.38	0.179	1.1617e-09	1	ZNF367
5.11214e-14	0.941597	0.41	0.2	2.6348e-10	1	CRTAC1
1.07122e-12	0.937678	0.346	0.16	5.52109e-09	1	TEX30
4.24891e-08	0.934439	0.271	0.142	0.000218989	1	TIMM17B
1.29938e-07	0.923144	0.251	0.129	0.000669701	1	ANXA3
6.38947e-09	0.921658	0.254	0.12	3.29313e-05	1	PSMC3IP
1.90484e-10	0.921588	0.302	0.144	9.81756e-07	1	CMSS1
1.1972e-08	0.918603	0.295	0.155	6.17038e-05	1	PFKFB3
1.54357e-08	0.914029	0.312	0.17	7.95554e-05	1	RBMX2
5.71386e-14	0.909975	0.417	0.201	2.94493e-10	1	DNTTIP1
2.94049e-11	0.90962	0.336	0.162	1.51553e-07	1	NIPA2
4.22872e-12	0.906071	0.346	0.163	2.17948e-08	1	TMEM41B
6.40415e-09	0.905685	0.298	0.155	3.3007e-05	1	LIMS1
7.12466e-07	0.903779	0.251	0.136	0.00367205	1	MADD
5.44363e-08	0.903075	0.271	0.141	0.000280565	1	USP1
6.30652e-09	0.902177	0.302	0.156	3.25038e-05	1	DDX52
7.8638e-09	0.90126	0.278	0.139	4.053e-05	1	RBBP8
1.56978e-06	0.898525	0.21	0.107	0.00809063	1	C3orf38
4.50664e-11	0.898014	0.339	0.166	2.32272e-07	1	PDZD11
1.7266e-12	0.897332	0.38	0.187	8.89889e-09	1	VAPB
1.27948e-10	0.896974	0.302	0.142	6.59444e-07	1	LNPK
1.21005e-08	0.896743	0.288	0.149	6.23661e-05	1	P4HA1
4.60135e-10	0.894818	0.322	0.163	2.37154e-06	1	ICK
2.6616e-07	0.893132	0.22	0.108	0.00137179	1	HDDC3
1.18428e-09	0.887677	0.305	0.153	6.10378e-06	1	FDXR
2.06191e-07	0.886927	0.264	0.14	0.00106271	1	SPINDOC
1.41354e-12	0.882473	0.376	0.181	7.28537e-09	1	BUB1
2.02836e-07	0.881905	0.244	0.125	0.00104542	1	SPTLC2
3.72982e-07	0.881544	0.268	0.146	0.00192235	1	MIB1
1.32077e-09	0.881272	0.319	0.163	6.80722e-06	1	PTGR1
2.03022e-09	0.880928	0.315	0.163	1.04638e-05	1	YARS
2.22319e-12	0.879636	0.386	0.191	1.14583e-08	1	METTL23
1.7241e-06	0.878181	0.22	0.115	0.00888601	1	VRK2
1.70644e-10	0.876131	0.346	0.176	8.79498e-07	1	RPUSD3
2.34727e-12	0.875942	0.417	0.216	1.20978e-08	1	DCAF10
3.7424e-07	0.875854	0.254	0.136	0.00192883	1	EXOSC5
2.95345e-10	0.87207	0.312	0.153	1.52221e-06	1	ZNF512B
4.2344e-08	0.869428	0.264	0.134	0.000218241	1	TTK
1.01629e-06	0.868637	0.224	0.116	0.00523794	1	CDK18
1.82714e-07	0.86237	0.261	0.138	0.000941709	1	CTDSPL
5.51068e-14	0.860244	0.522	0.295	2.84021e-10	1	NT5C3B
2.44157e-12	0.859528	0.376	0.185	1.25838e-08	1	DNAJC10
2.01925e-13	0.858004	0.427	0.213	1.04072e-09	1	ZNF12
2.30614e-11	0.857811	0.353	0.174	1.18859e-07	1	GZF1
1.30182e-07	0.856295	0.264	0.138	0.000670958	1	PLOD1
1.33796e-08	0.856043	0.237	0.11	6.89583e-05	1	CYB561D2
3.86727e-07	0.855657	0.234	0.119	0.00199319	1	RBM27
5.7875e-10	0.855422	0.353	0.186	2.98288e-06	1	USP9X
3.28356e-09	0.854259	0.339	0.183	1.69235e-05	1	EXOC6B
4.91689e-08	0.854213	0.281	0.147	0.000253417	1	LMBRD1
5.99239e-07	0.853374	0.254	0.137	0.00308848	1	DVL1
1.59208e-06	0.852975	0.2	0.099	0.00820556	1	IQCE
5.41938e-08	0.851791	0.271	0.14	0.000279315	1	GOLGA5
4.34767e-11	0.851699	0.386	0.202	2.24079e-07	1	MED8
2.21581e-09	0.851312	0.315	0.162	1.14203e-05	1	POP5
5.13754e-08	0.850119	0.285	0.151	0.000264789	1	KLHDC10
4.51035e-08	0.848738	0.275	0.142	0.000232464	1	MTA1
2.05823e-07	0.84744	0.285	0.157	0.00106081	1	TMEM184C
2.74864e-14	0.846589	0.492	0.259	1.41665e-10	1	ERCC6L2
2.33764e-12	0.844222	0.417	0.215	1.20482e-08	1	UBE2N
8.68479e-08	0.844222	0.268	0.139	0.000447614	1	ADAM17
5.1043e-11	0.843663	0.38	0.196	2.63076e-07	1	DSN1
7.72447e-07	0.843501	0.231	0.119	0.00398119	1	USP42
7.02612e-11	0.842946	0.342	0.169	3.62126e-07	1	ZFAND2A
3.29443e-13	0.842877	0.414	0.203	1.69795e-09	1	SGTA
6.02829e-10	0.841602	0.329	0.167	3.10698e-06	1	CEP78
2.59187e-07	0.841043	0.254	0.133	0.00133585	1	VTA1
7.0452e-11	0.840564	0.38	0.198	3.63109e-07	1	DMAC2
5.40112e-12	0.834238	0.403	0.208	2.78374e-08	1	FOPNL
1.35177e-07	0.833567	0.268	0.141	0.0006967	1	PAF1
3.29284e-10	0.831731	0.298	0.141	1.69713e-06	1	CMAS
1.081e-07	0.831267	0.281	0.151	0.000557145	1	MAP3K7
1.21704e-06	0.831122	0.227	0.118	0.00627263	1	AZI2
7.939e-17	0.830653	0.566	0.299	4.09176e-13	1	MEA1
4.93248e-08	0.828817	0.271	0.14	0.00025422	1	BRAP
2.69501e-07	0.82784	0.258	0.136	0.00138901	1	FAM234A
8.16443e-12	0.827315	0.447	0.246	4.20795e-08	1	IMPAD1
3.74391e-08	0.827279	0.278	0.143	0.000192961	1	PEMT
3.32399e-10	0.827043	0.353	0.182	1.71318e-06	1	PFKP
5.4777e-11	0.826461	0.346	0.169	2.82321e-07	1	NUF2
1.76635e-06	0.826018	0.203	0.102	0.00910375	1	TP53INP2
7.38435e-08	0.825228	0.268	0.138	0.00038059	1	HDAC11
6.68414e-14	0.822742	0.492	0.259	3.44501e-10	1	FBXW11
7.40204e-08	0.822742	0.285	0.151	0.000381501	1	EIPR1
1.86006e-07	0.821387	0.247	0.126	0.000958674	1	SYS1
1.83171e-11	0.820231	0.38	0.193	9.44061e-08	1	SLC25A17
6.30774e-13	0.819623	0.461	0.246	3.25101e-09	1	ZPR1
4.02082e-07	0.819234	0.268	0.145	0.00207233	1	CARHSP1
1.62552e-10	0.819067	0.397	0.212	8.37793e-07	1	CRKL
6.06727e-10	0.817422	0.346	0.179	3.12707e-06	1	UBXN2A
1.25402e-06	0.816781	0.224	0.116	0.00646324	1	MFAP3
7.92892e-08	0.815129	0.261	0.133	0.000408657	1	AURKA
3.69286e-15	0.814503	0.553	0.302	1.9033e-11	1	PCLAF
3.60411e-08	0.813405	0.281	0.146	0.000185756	1	VAMP7
6.48266e-10	0.811563	0.319	0.158	3.34116e-06	1	BRD3OS
5.30333e-08	0.811338	0.285	0.15	0.000273333	1	PREB
8.377e-08	0.811338	0.275	0.144	0.000431751	1	POLR3C
2.29119e-10	0.809532	0.38	0.204	1.18088e-06	1	ISCA1
1.52388e-07	0.808598	0.271	0.143	0.00078541	1	CLPB
5.3806e-08	0.805669	0.271	0.139	0.000277316	1	PIK3C3
1.02506e-09	0.80306	0.376	0.207	5.28317e-06	1	VPS26C
8.43834e-07	0.802934	0.271	0.152	0.00434912	1	SELENOO
6.6965e-15	0.802843	0.519	0.272	3.45138e-11	1	TMEM106B
1.23475e-08	0.801209	0.339	0.187	6.3639e-05	1	TP53RK
1.55458e-14	0.800632	0.498	0.257	8.01232e-11	1	TFRC
4.55651e-12	0.798381	0.444	0.238	2.34843e-08	1	FIBP
1.04053e-07	0.79748	0.281	0.149	0.000536291	1	NOC2L
3.63503e-09	0.796107	0.353	0.193	1.87349e-05	1	GRB10
9.83408e-10	0.794208	0.353	0.186	5.06849e-06	1	TMEM163
7.81174e-11	0.794143	0.39	0.204	4.02617e-07	1	RNF2
2.55121e-13	0.793596	0.519	0.287	1.31489e-09	1	PHLDA2
2.31244e-08	0.792916	0.322	0.175	0.000119183	1	MED10
5.5348e-07	0.790321	0.217	0.107	0.00285263	1	DNAJC9
1.04619e-14	0.788114	0.539	0.291	5.39208e-11	1	CYTH2
1.41126e-10	0.788015	0.383	0.201	7.27366e-07	1	KIF11
5.74877e-10	0.786114	0.369	0.197	2.96292e-06	1	ACOT8
9.46075e-11	0.784607	0.41	0.221	4.87607e-07	1	PRDX3
1.20801e-07	0.783961	0.288	0.155	0.00062261	1	EHBP1
6.6081e-08	0.783424	0.305	0.168	0.000340581	1	BLZF1
3.26002e-08	0.783328	0.302	0.162	0.000168022	1	ACAA1
3.48359e-10	0.783254	0.403	0.222	1.79544e-06	1	GNS
5.54623e-10	0.781959	0.4	0.225	2.85853e-06	1	STXBP3
2.51922e-07	0.781883	0.281	0.154	0.00129841	1	ACAD9
1.56345e-09	0.781127	0.4	0.229	8.05803e-06	1	UBE2T
7.40742e-11	0.779241	0.41	0.221	3.81778e-07	1	FAM217B
3.39458e-08	0.779241	0.315	0.171	0.000174957	1	UBE2K
6.1995e-08	0.778702	0.319	0.178	0.000319522	1	USB1
2.28888e-11	0.77802	0.437	0.24	1.17969e-07	1	RALBP1
1.61047e-07	0.776978	0.258	0.133	0.000830036	1	JUN
4.64088e-08	0.775295	0.292	0.153	0.000239191	1	MAML1
1.23838e-06	0.775046	0.268	0.149	0.00638263	1	SEC16A
1.8382e-09	0.774526	0.376	0.208	9.47406e-06	1	C17orf58
4.14453e-07	0.774487	0.305	0.175	0.00213609	1	MTR
6.00567e-08	0.774281	0.329	0.183	0.000309532	1	SPNS1
1.3182e-09	0.770825	0.424	0.248	6.794e-06	1	PSMG1
4.97742e-07	0.770668	0.298	0.17	0.00256536	1	POFUT1
1.18202e-08	0.770001	0.295	0.151	6.09215e-05	1	SMYD5
4.245e-11	0.76943	0.427	0.233	2.18787e-07	1	TMEM30A
2.51355e-07	0.769303	0.308	0.174	0.00129549	1	PXN
7.30533e-10	0.768154	0.427	0.248	3.76517e-06	1	PPFIBP1
4.01803e-09	0.76602	0.346	0.185	2.07089e-05	1	EMC7
1.64515e-10	0.765473	0.38	0.198	8.47912e-07	1	CUL3
1.98653e-12	0.765114	0.475	0.256	1.02386e-08	1	GPRIN1
3.82968e-07	0.763849	0.315	0.182	0.00197382	1	SYDE1
1.19848e-07	0.763849	0.292	0.157	0.000617698	1	SPRTN
1.70363e-07	0.763849	0.288	0.157	0.000878052	1	IKBIP
7.59846e-09	0.763508	0.356	0.197	3.91625e-05	1	FBXO25
1.43594e-08	0.763508	0.356	0.201	7.40085e-05	1	TMEM68
5.54104e-07	0.762428	0.275	0.151	0.00285585	1	GABBR1
6.40644e-09	0.761009	0.359	0.198	3.30188e-05	1	TBK1
4.47826e-08	0.76032	0.312	0.169	0.00023081	1	R3HDM2
4.06696e-09	0.760044	0.353	0.192	2.09611e-05	1	STRADA
3.42459e-09	0.759965	0.329	0.172	1.76503e-05	1	PLP1
8.21764e-10	0.759549	0.397	0.219	4.23537e-06	1	SDE2
2.21655e-09	0.758743	0.383	0.215	1.14241e-05	1	ANKIB1
5.94686e-07	0.758612	0.319	0.188	0.00306501	1	OGFOD3
1.02262e-06	0.758396	0.258	0.14	0.00527056	1	UBL7
1.07025e-06	0.757972	0.227	0.116	0.00551609	1	RAB11FIP5
3.12244e-07	0.757558	0.268	0.142	0.00160931	1	ITPRID2
1.45218e-12	0.757558	0.481	0.263	7.48451e-09	1	SAMD4B
1.49335e-10	0.757423	0.386	0.203	7.69673e-07	1	PKIG
3.56676e-12	0.756071	0.441	0.229	1.83831e-08	1	TMEM268
4.32437e-09	0.755944	0.325	0.168	2.22878e-05	1	RALGDS
6.52688e-08	0.754718	0.319	0.177	0.000336395	1	ANXA6
2.18561e-09	0.754685	0.397	0.226	1.12646e-05	1	NPM3
2.94518e-09	0.754234	0.39	0.22	1.51795e-05	1	PAK4
1.252e-07	0.753264	0.298	0.162	0.000645281	1	DPF2
7.6064e-07	0.751113	0.275	0.152	0.00392034	1	PGRMC1
1.17503e-08	0.750952	0.322	0.171	6.05611e-05	1	SLC1A5
1.47789e-07	0.750952	0.315	0.178	0.000761705	1	DTX4
1.16049e-06	0.750174	0.268	0.149	0.00598117	1	C12orf45
3.43327e-09	0.749541	0.373	0.206	1.76951e-05	1	NNT
2.77427e-10	0.749337	0.393	0.209	1.42986e-06	1	ADIPOR2
6.55766e-09	0.748518	0.349	0.189	3.37982e-05	1	EIF4G3
2.39194e-07	0.748474	0.288	0.157	0.00123281	1	CWF19L1
4.54358e-07	0.747701	0.295	0.165	0.00234176	1	PIGS
1.31075e-09	0.747454	0.363	0.193	6.7556e-06	1	AIF1L
4.33027e-09	0.747454	0.363	0.198	2.23182e-05	1	TRIM11
1.31714e-06	0.747212	0.292	0.168	0.00678856	1	ELK1
4.51233e-07	0.746858	0.261	0.138	0.00232565	1	ZNF512
1.09582e-06	0.746514	0.292	0.168	0.00564786	1	CHCHD5
6.84477e-09	0.745856	0.329	0.172	3.52779e-05	1	STX5
2.99127e-08	0.745403	0.363	0.211	0.00015417	1	PRKG2
1.26986e-10	0.744423	0.414	0.224	6.54484e-07	1	CNIH1
3.48722e-09	0.744268	0.353	0.188	1.79731e-05	1	GTPBP4
7.97585e-09	0.744268	0.353	0.193	4.11075e-05	1	FOXJ3
7.07733e-12	0.743671	0.424	0.22	3.64766e-08	1	FBXO44
4.95185e-18	0.742572	0.722	0.444	2.55219e-14	1	SPP1
1.49769e-10	0.742352	0.468	0.27	7.71909e-07	1	PBK
1.37845e-08	0.741469	0.325	0.173	7.10456e-05	1	SFSWAP
1.74334e-07	0.740641	0.322	0.183	0.000898516	1	NUDT2
2.7873e-07	0.740081	0.271	0.144	0.00143657	1	JAM3
2.62779e-08	0.739193	0.349	0.196	0.000135436	1	AKIRIN2
6.10458e-07	0.739148	0.275	0.15	0.0031463	1	TUFT1
2.22785e-08	0.738931	0.349	0.195	0.000114823	1	COPS2
1.82113e-11	0.738409	0.458	0.252	9.38608e-08	1	SYNGR1
2.07667e-10	0.737854	0.386	0.205	1.07031e-06	1	RPF2
6.9216e-08	0.737706	0.315	0.173	0.000356739	1	TMEM60
4.19623e-07	0.736263	0.322	0.188	0.00216274	1	BAP1
2.65672e-08	0.736146	0.342	0.19	0.000136927	1	MTREX
1.15944e-10	0.736088	0.431	0.24	5.97576e-07	1	RAVER1
1.77663e-08	0.735591	0.353	0.196	9.15674e-05	1	NFYA
2.21571e-13	0.735591	0.471	0.242	1.14198e-09	1	TM9SF2
3.20321e-12	0.735591	0.464	0.247	1.65093e-08	1	DNAJB6
1.67931e-10	0.735591	0.434	0.243	8.65516e-07	1	ARID5B
7.91946e-10	0.735382	0.366	0.193	4.08169e-06	1	KLHDC3
4.1806e-09	0.734702	0.376	0.209	2.15468e-05	1	MAPK3
5.00257e-13	0.734305	0.488	0.26	2.57833e-09	1	TMEM126B
2.57629e-07	0.734178	0.281	0.152	0.00132782	1	BIRC6
4.4058e-07	0.733815	0.285	0.157	0.00227075	1	SKAP2
1.18195e-07	0.733586	0.288	0.153	0.000609178	1	ELOVL1
7.63144e-13	0.733388	0.569	0.338	3.93324e-09	1	NAMPT
7.27755e-13	0.732922	0.458	0.236	3.75085e-09	1	ODC1
3.72307e-11	0.732545	0.444	0.24	1.91887e-07	1	METTL2A
1.91958e-07	0.73182	0.336	0.194	0.000989352	1	SLU7
2.28249e-09	0.731112	0.369	0.199	1.17639e-05	1	HMOX2
2.26278e-10	0.729901	0.417	0.23	1.16624e-06	1	EEF1E1
8.21375e-07	0.72862	0.278	0.154	0.00423337	1	C5orf22
2.01956e-07	0.72856	0.278	0.147	0.00104088	1	RBPMS
1.26107e-06	0.728501	0.281	0.159	0.00649956	1	RCE1
2.01066e-07	0.727929	0.315	0.178	0.00103629	1	GPR158
3.46632e-08	0.727059	0.366	0.212	0.000178654	1	RAB12
2.33805e-08	0.726827	0.38	0.22	0.000120503	1	UCK1
3.12077e-14	0.723207	0.614	0.357	1.60844e-10	1	STOML2
6.68263e-10	0.723207	0.39	0.213	3.44423e-06	1	AKT1
3.34296e-09	0.723207	0.38	0.211	1.72296e-05	1	ATRN
4.99994e-07	0.723207	0.261	0.138	0.00257697	1	ZMYM6
6.09757e-07	0.723207	0.305	0.175	0.00314269	1	IGSF3
1.28185e-06	0.723207	0.264	0.145	0.00660664	1	DPH5
1.86548e-09	0.723207	0.403	0.227	9.61466e-06	1	GPATCH8
6.94305e-09	0.720204	0.427	0.258	3.57845e-05	1	MLST8
3.1802e-09	0.719726	0.393	0.222	1.63908e-05	1	DYNC1I2
5.48497e-08	0.719541	0.369	0.217	0.000282695	1	ADAM15
1.41099e-08	0.718919	0.332	0.177	7.27225e-05	1	RFC3
3.93655e-09	0.718545	0.315	0.16	2.0289e-05	1	ARL14EP
1.32796e-06	0.718206	0.285	0.162	0.00684432	1	USP40
8.625e-07	0.718154	0.285	0.159	0.00444533	1	MFSD14A
3.47049e-10	0.716851	0.434	0.243	1.78869e-06	1	HK1
7.16167e-10	0.715533	0.383	0.206	3.69113e-06	1	EPRS
7.92138e-10	0.715533	0.386	0.208	4.08268e-06	1	MAEA
7.0675e-09	0.715533	0.366	0.201	3.64259e-05	1	PDE4B
6.19416e-09	0.71528	0.363	0.198	3.19247e-05	1	SPPL3
1.66758e-07	0.715147	0.349	0.206	0.000859472	1	FOXRED2
3.48824e-08	0.714645	0.339	0.188	0.000179784	1	CEBPG
2.28789e-07	0.714246	0.315	0.179	0.00117918	1	TMEM263
1.14922e-10	0.713929	0.447	0.251	5.92306e-07	1	CCT4
1.93504e-06	0.713808	0.305	0.181	0.00997318	1	NUDCD1
1.52762e-11	0.713524	0.508	0.298	7.87334e-08	1	WASL
1.15726e-10	0.713083	0.424	0.231	5.96451e-07	1	ZNF703
4.80673e-09	0.712236	0.386	0.218	2.47739e-05	1	ALG3
1.26855e-11	0.712066	0.492	0.274	6.53813e-08	1	RABAC1
6.48313e-07	0.712066	0.268	0.145	0.00334141	1	MICAL3
1.69787e-06	0.712066	0.268	0.149	0.00875084	1	SLC25A36
1.0163e-13	0.712066	0.573	0.324	5.238e-10	1	CCDC43
1.05315e-06	0.711936	0.268	0.146	0.00542793	1	FAM171A2
6.97981e-12	0.711869	0.481	0.266	3.59739e-08	1	PTOV1
1.55439e-12	0.711802	0.59	0.363	8.01134e-09	1	CRTAP
1.77351e-08	0.710823	0.356	0.198	9.14069e-05	1	NUSAP1
2.54432e-07	0.710383	0.332	0.193	0.00131134	1	DERL1
1.1001e-09	0.710268	0.417	0.237	5.66991e-06	1	POLR2C
9.24704e-10	0.709724	0.417	0.235	4.76593e-06	1	VPS37B
3.30857e-08	0.70966	0.322	0.174	0.000170524	1	SELENOF
3.3038e-08	0.707265	0.353	0.198	0.000170278	1	SLC20A1
5.10685e-10	0.707159	0.434	0.246	2.63207e-06	1	BCL2L2
1.37932e-06	0.707087	0.275	0.153	0.007109	1	MTSS2
4.01473e-10	0.707051	0.434	0.242	2.06919e-06	1	EXOC5
9.18318e-08	0.706859	0.349	0.203	0.000473301	1	CHD7
9.59493e-07	0.706528	0.271	0.149	0.00494522	1	PPIL2
4.70914e-10	0.706133	0.424	0.235	2.42709e-06	1	TSG101
2.13854e-10	0.705929	0.461	0.266	1.10221e-06	1	NXT1
9.81858e-09	0.705887	0.393	0.225	5.0605e-05	1	DNTTIP2
1.98332e-08	0.70524	0.376	0.217	0.00010222	1	TMEM38B
2.20098e-07	0.705173	0.319	0.18	0.00113439	1	DYNC1LI1
6.94541e-12	0.70471	0.464	0.253	3.57966e-08	1	KIF1C
6.46643e-07	0.704651	0.308	0.177	0.0033328	1	LCORL
5.00654e-11	0.704286	0.515	0.309	2.58037e-07	1	SH3GLB1
1.43629e-11	0.703989	0.488	0.278	7.40266e-08	1	USP7
5.33952e-10	0.703841	0.431	0.244	2.75199e-06	1	CAND1
5.20941e-08	0.703789	0.363	0.211	0.000268493	1	METRN
3.87951e-08	0.703511	0.315	0.169	0.00019995	1	CHMP2B
3.11695e-08	0.703471	0.359	0.203	0.000160648	1	THAP4
5.00828e-09	0.702597	0.4	0.229	2.58127e-05	1	TSEN34
8.97189e-08	0.702084	0.332	0.187	0.000462411	1	TRIAP1
3.04266e-09	0.701228	0.434	0.253	1.56819e-05	1	ASF1B
5.38092e-09	0.700664	0.38	0.211	2.77333e-05	1	DCPS
8.45673e-07	0.700487	0.308	0.179	0.0043586	1	TXNDC9
4.29439e-08	0.70027	0.322	0.175	0.000221333	1	PACC1
1.03877e-06	0.69936	0.258	0.138	0.00535382	1	SOS1
1.64806e-10	0.69936	0.475	0.274	8.4941e-07	1	ZMYND19
8.33456e-07	0.69936	0.302	0.172	0.00429563	1	SNAP29
3.31451e-08	0.699161	0.353	0.198	0.00017083	1	MTOR
3.84891e-08	0.699017	0.383	0.225	0.000198373	1	TNFRSF21
1.22155e-08	0.698332	0.353	0.194	6.29586e-05	1	C9orf78
8.1274e-10	0.697784	0.437	0.251	4.18886e-06	1	BRD8
7.43039e-07	0.697581	0.292	0.164	0.00382962	1	HMBS
8.86844e-10	0.697094	0.434	0.246	4.57079e-06	1	CSPG4
7.34416e-12	0.696975	0.553	0.327	3.78518e-08	1	BET1L
5.67418e-10	0.696601	0.508	0.313	2.92447e-06	1	PCDHGC3
1.40505e-10	0.696551	0.434	0.24	7.24163e-07	1	TRMT6
4.86319e-08	0.696489	0.329	0.181	0.000250649	1	SLC30A6
6.26852e-07	0.695985	0.373	0.235	0.00323079	1	USO1
1.19597e-06	0.695462	0.312	0.183	0.00616402	1	MAGT1
1.39496e-08	0.694778	0.386	0.222	7.18964e-05	1	CNPPD1
8.20915e-11	0.694255	0.427	0.23	4.231e-07	1	BAG3
5.26966e-07	0.694228	0.329	0.194	0.00271598	1	KRIT1
6.39127e-09	0.694134	0.376	0.21	3.29406e-05	1	EIF3E
7.92201e-07	0.693459	0.332	0.198	0.004083	1	SDAD1
1.56784e-06	0.693087	0.254	0.138	0.00808062	1	DPYSL3
9.07173e-08	0.692992	0.369	0.217	0.000467557	1	AASDHPPT
2.31248e-07	0.69251	0.292	0.158	0.00119185	1	RNF141
6.78717e-07	0.69251	0.285	0.158	0.00349811	1	NUP50
1.88633e-11	0.692434	0.529	0.311	9.72212e-08	1	TMEM98
7.29248e-07	0.69218	0.288	0.16	0.00375855	1	ZNF326
2.14036e-09	0.691498	0.397	0.218	1.10314e-05	1	CENPU
3.86584e-07	0.691498	0.315	0.18	0.00199245	1	TAZ
8.8429e-11	0.690719	0.468	0.263	4.55763e-07	1	ATF6B
4.9265e-09	0.690292	0.39	0.219	2.53912e-05	1	AC118549.1
2.55016e-07	0.690256	0.312	0.173	0.00131435	1	ME2
3.85828e-09	0.689964	0.42	0.242	1.98856e-05	1	PATL1
4.19639e-09	0.689901	0.431	0.255	2.16282e-05	1	PCYT2
1.84549e-08	0.687495	0.386	0.225	9.51166e-05	1	MAD2L2
1.03164e-09	0.686681	0.397	0.216	5.31705e-06	1	SNX25
1.87769e-08	0.686427	0.393	0.231	9.67759e-05	1	AP2A2
1.21943e-08	0.685829	0.376	0.213	6.28496e-05	1	BAZ2A
3.44404e-10	0.685375	0.42	0.231	1.77506e-06	1	CDCA7
1.89554e-08	0.685239	0.376	0.216	9.76961e-05	1	SMIM15
1.146e-09	0.684937	0.376	0.201	5.90647e-06	1	WTIP
2.98661e-11	0.683894	0.502	0.29	1.5393e-07	1	SELENOS
6.23776e-08	0.683678	0.312	0.168	0.000321494	1	KRR1
1.01322e-06	0.683678	0.295	0.168	0.00522216	1	GATAD1
2.01937e-09	0.682772	0.386	0.211	1.04078e-05	1	VPS16
1.52521e-10	0.682755	0.532	0.326	7.86095e-07	1	CPEB2
1.20624e-06	0.681787	0.308	0.179	0.00621698	1	RRM1
1.04362e-06	0.680138	0.275	0.152	0.00537882	1	NCS1
3.4219e-09	0.680138	0.41	0.235	1.76364e-05	1	VIRMA
2.88083e-08	0.679839	0.403	0.24	0.000148478	1	AGO1
5.85917e-07	0.67965	0.275	0.149	0.00301982	1	SBF2
6.13028e-10	0.679425	0.38	0.201	3.15955e-06	1	SMIM19
2.18933e-08	0.678688	0.363	0.203	0.000112838	1	SMDT1
2.41302e-09	0.678489	0.471	0.284	1.24367e-05	1	RFC2
2.51249e-08	0.678419	0.417	0.251	0.000129494	1	LCMT1
3.09838e-07	0.677926	0.339	0.198	0.00159691	1	MAD2L1BP
1.95623e-11	0.677853	0.481	0.264	1.00824e-07	1	RGS20
9.99296e-09	0.677764	0.383	0.216	5.15037e-05	1	TCEAL9
9.76488e-08	0.677257	0.319	0.175	0.000503282	1	POLK
7.2461e-07	0.677037	0.264	0.142	0.00373464	1	CD2BP2
2.2005e-14	0.676779	0.637	0.381	1.13414e-10	1	PRNP
3.42061e-10	0.676514	0.444	0.248	1.76298e-06	1	MED22
1.14624e-10	0.676386	0.505	0.299	5.90773e-07	1	RNF20
2.00039e-07	0.67632	0.332	0.191	0.001031	1	BRWD1
5.66777e-09	0.676286	0.369	0.202	2.92117e-05	1	LIPA
5.25854e-07	0.675901	0.305	0.172	0.00271025	1	MAGED1
2.33673e-11	0.675901	0.468	0.255	1.20435e-07	1	CSTF1
2.76373e-08	0.675901	0.383	0.221	0.000142442	1	SLK
4.58168e-10	0.675589	0.441	0.249	2.3614e-06	1	TBRG1
1.08521e-06	0.675474	0.315	0.185	0.00559318	1	RC3H2
7.08712e-07	0.674597	0.308	0.177	0.0036527	1	KDM3A
1.05895e-06	0.674597	0.322	0.19	0.00545784	1	WDR3
3.94319e-09	0.673963	0.414	0.236	2.03232e-05	1	FAM136A
2.51467e-08	0.673219	0.332	0.179	0.000129606	1	MYO19
1.03748e-06	0.673166	0.268	0.146	0.00534718	1	CDC42BPA
3.02729e-08	0.672028	0.369	0.211	0.000156026	1	GNL2
8.83318e-10	0.67186	0.424	0.238	4.55262e-06	1	SNRPF
1.05265e-07	0.671677	0.346	0.197	0.000542537	1	RBL1
5.38579e-07	0.671145	0.363	0.222	0.00277584	1	SLC27A1
2.52447e-09	0.670739	0.441	0.259	1.30111e-05	1	PPFIA1
1.03947e-06	0.670739	0.325	0.193	0.00535742	1	DNM1L
4.38623e-08	0.670295	0.353	0.198	0.000226066	1	SGCD
7.33563e-07	0.670214	0.305	0.175	0.00378079	1	UPF1
8.87073e-07	0.670161	0.285	0.159	0.00457198	1	CKB
2.35226e-07	0.669909	0.359	0.213	0.00121236	1	SCAMP4
7.16329e-07	0.669768	0.319	0.185	0.00369196	1	LTA4H
9.50305e-10	0.669709	0.434	0.25	4.89787e-06	1	CREBL2
2.1595e-08	0.669569	0.38	0.214	0.000111301	1	AGPS
1.29107e-08	0.669483	0.369	0.205	6.65416e-05	1	PDRG1
4.76762e-07	0.669384	0.339	0.199	0.00245723	1	PQBP1
1.56427e-09	0.668572	0.492	0.302	8.06226e-06	1	CD151
1.15943e-08	0.668109	0.397	0.229	5.9757e-05	1	NUDCD3
8.92382e-07	0.667712	0.339	0.203	0.00459934	1	MOB2
5.55225e-08	0.667712	0.322	0.175	0.000286163	1	MOSPD2
7.33826e-08	0.667464	0.342	0.192	0.000378214	1	SLC26A2
8.37593e-09	0.667308	0.4	0.227	4.31696e-05	1	PPIE
9.11901e-09	0.667064	0.386	0.218	4.69994e-05	1	ECHS1
1.04164e-06	0.666452	0.319	0.186	0.00536863	1	YIF1A
8.06326e-08	0.665932	0.336	0.188	0.00041558	1	CCNY
2.82595e-09	0.665491	0.424	0.243	1.4565e-05	1	RAD51C
1.56587e-11	0.665363	0.559	0.335	8.07048e-08	1	NDUFAB1
5.76007e-09	0.66365	0.464	0.285	2.96874e-05	1	DYNLL1
2.38366e-08	0.663397	0.373	0.211	0.000122854	1	KIF5B
1.89969e-06	0.663182	0.308	0.181	0.00979098	1	POLD1
1.35744e-07	0.662352	0.403	0.248	0.000699623	1	VASP
1.92426e-06	0.661806	0.322	0.194	0.00991762	1	PXK
1.16537e-09	0.660665	0.444	0.259	6.00629e-06	1	GRPEL1
1.47514e-06	0.660471	0.319	0.188	0.00760285	1	PGM1
7.46923e-08	0.660197	0.339	0.19	0.000384964	1	CISD2
1.33009e-07	0.660059	0.407	0.251	0.000685528	1	IARS2
4.76633e-09	0.660013	0.4	0.226	2.45657e-05	1	NOP14
7.28938e-09	0.659818	0.417	0.24	3.75695e-05	1	SLC9A3R1
3.40603e-07	0.657405	0.315	0.178	0.00175547	1	NDUFA7
4.23171e-11	0.657156	0.519	0.305	2.18102e-07	1	DPM1
1.9266e-10	0.657118	0.403	0.213	9.92971e-07	1	ZFYVE27
1.7988e-08	0.657017	0.4	0.233	9.27103e-05	1	MCOLN1
4.20511e-07	0.656639	0.349	0.207	0.00216731	1	SEC23B
4.27965e-07	0.656639	0.346	0.205	0.00220573	1	SMC2
4.23473e-08	0.656497	0.437	0.27	0.000218258	1	LRRN3
7.20495e-07	0.656093	0.332	0.196	0.00371343	1	MBD6
1.31318e-07	0.656093	0.363	0.211	0.000676812	1	NUP155
1.35785e-10	0.656093	0.434	0.235	6.99835e-07	1	SRSF4
4.05359e-08	0.655596	0.39	0.229	0.000208922	1	DESI2
1.69399e-06	0.655417	0.292	0.166	0.00873081	1	VPS11
9.71351e-08	0.654972	0.363	0.211	0.000500634	1	POP7
2.7324e-07	0.654972	0.346	0.202	0.00140828	1	RXRG
1.65107e-06	0.65462	0.285	0.161	0.00850959	1	NR2C2
1.88481e-07	0.654494	0.434	0.272	0.00097143	1	SIGMAR1
2.28024e-07	0.654494	0.349	0.203	0.00117523	1	CLDN12
1.18501e-07	0.653666	0.336	0.188	0.000610757	1	HECTD1
9.06481e-08	0.652817	0.312	0.17	0.0004672	1	EHD1
2.1422e-07	0.652615	0.336	0.192	0.00110409	1	TMX4
1.48918e-08	0.652323	0.4	0.229	7.67523e-05	1	TNFAIP3
2.32641e-07	0.652124	0.376	0.228	0.00119903	1	PPIL4
2.6735e-09	0.651902	0.393	0.216	1.37792e-05	1	BET1
1.32303e-11	0.651292	0.464	0.248	6.81891e-08	1	G6PC3
4.48759e-12	0.651203	0.6	0.361	2.31291e-08	1	MYBL2
1.14776e-07	0.651057	0.38	0.226	0.000591557	1	SMNDC1
4.04025e-10	0.650603	0.458	0.259	2.08235e-06	1	FOXN2
2.17455e-07	0.650374	0.319	0.177	0.00112076	1	SETD2
1.68173e-06	0.650275	0.285	0.161	0.00866765	1	PHKG2
1.00258e-11	0.650275	0.519	0.297	5.16728e-08	1	STMN1
1.76309e-10	0.650214	0.478	0.274	9.08698e-07	1	ZMPSTE24
5.53221e-09	0.650059	0.417	0.242	2.8513e-05	1	IMMT
1.48507e-09	0.649033	0.414	0.231	7.65406e-06	1	AGFG1
6.49861e-10	0.646893	0.417	0.225	3.34938e-06	1	RNF157
5.53055e-10	0.646856	0.502	0.299	2.85045e-06	1	ZNF106
2.58714e-07	0.646039	0.295	0.16	0.00133341	1	LYRM2
1.36204e-06	0.645204	0.312	0.182	0.00701993	1	HPRT1
3.96961e-12	0.644379	0.525	0.296	2.04594e-08	1	ACP1
1.5643e-09	0.644037	0.508	0.311	8.06241e-06	1	ZFAND6
3.54929e-08	0.644037	0.383	0.222	0.00018293	1	FSD1L
8.1508e-08	0.643518	0.386	0.229	0.000420092	1	GUCD1
5.58489e-09	0.643354	0.38	0.208	2.87845e-05	1	TOMM22
6.06905e-11	0.642905	0.536	0.318	3.12799e-07	1	PFKM
1.33794e-06	0.642757	0.292	0.164	0.00689576	1	CCNA2
6.22023e-09	0.642353	0.4	0.227	3.20591e-05	1	FAM162A
7.62082e-07	0.641907	0.342	0.203	0.00392777	1	MID1
2.36633e-07	0.641593	0.363	0.216	0.00121961	1	RNF40
1.09797e-09	0.641069	0.461	0.268	5.65894e-06	1	OSBPL2
3.69849e-07	0.641038	0.295	0.162	0.0019062	1	FURIN
2.85269e-08	0.640563	0.417	0.25	0.000147028	1	TM4SF19
4.26091e-11	0.640151	0.505	0.289	2.19608e-07	1	COMMD7
7.19291e-07	0.639375	0.342	0.203	0.00370723	1	PIK3C2A
1.44221e-07	0.638994	0.359	0.208	0.000743316	1	U2SURP
2.68814e-07	0.638318	0.305	0.169	0.00138547	1	CREG1
8.79529e-09	0.638318	0.437	0.259	4.53309e-05	1	JAGN1
1.63439e-10	0.637293	0.532	0.316	8.42367e-07	1	STX3
5.60523e-08	0.636552	0.407	0.244	0.000288893	1	UCKL1
1.72458e-07	0.635948	0.4	0.242	0.000888846	1	TTLL12
8.05474e-07	0.635744	0.359	0.22	0.00415141	1	PROS1
3.42485e-09	0.635054	0.458	0.273	1.76517e-05	1	ZMAT2
3.30564e-09	0.63482	0.441	0.256	1.70373e-05	1	DKC1
6.24126e-08	0.634398	0.332	0.183	0.000321675	1	PDCL3
1.19505e-08	0.634081	0.403	0.231	6.15927e-05	1	ITPK1
3.16012e-11	0.633477	0.522	0.308	1.62873e-07	1	JMJD6
2.12731e-07	0.63341	0.336	0.192	0.00109642	1	RBCK1
1.76946e-11	0.633305	0.539	0.317	9.11978e-08	1	CGGBP1
1.02025e-07	0.632792	0.4	0.243	0.000525838	1	SRP72
4.28456e-07	0.632792	0.38	0.231	0.00220826	1	MEPCE
1.73589e-06	0.202622	0.997	0.99	0.00894679	2	PPDPF
1.89606e-06	-0.453695	0.313	0.485	0.0097723	2	CDC42SE1
7.47836e-07	-0.510776	0.402	0.552	0.00385435	2	NRP2
1.07438e-06	-0.511796	0.331	0.5	0.00553737	2	PRDX5
7.93866e-07	-0.512998	0.269	0.438	0.00409158	2	SPIRE1
1.09469e-06	-0.519188	0.269	0.438	0.00564204	2	RWDD1
1.53341e-06	-0.521731	0.297	0.472	0.00790318	2	SYNE2
1.37019e-06	-0.532392	0.238	0.398	0.00706196	2	ETFB
5.51091e-07	-0.53279	0.279	0.449	0.00284032	2	PYCARD
1.88318e-06	-0.539481	0.235	0.395	0.00970589	2	SURF1
1.15953e-06	-0.547344	0.176	0.327	0.00597622	2	FOXM1
1.29228e-07	-0.55616	0.334	0.519	0.000666039	2	IL16
1.58194e-08	-0.569831	0.294	0.493	8.15333e-05	2	LY6E
2.74939e-08	-0.572426	0.282	0.466	0.000141703	2	UBTF
1.30256e-07	-0.576392	0.26	0.44	0.000671342	2	CHL1
1.11464e-06	-0.579548	0.307	0.47	0.00574484	2	HLA-E
1.82529e-06	-0.592947	0.279	0.431	0.00940757	2	GOLPH3
5.62444e-07	-0.595607	0.198	0.357	0.00289884	2	HEXA
1.31253e-06	-0.595995	0.214	0.368	0.00676476	2	SEC24C
4.2259e-08	-0.602213	0.257	0.449	0.000217803	2	TLN1
6.97691e-07	-0.61277	0.211	0.372	0.0035959	2	EIF2B5
8.25916e-07	-0.614789	0.204	0.356	0.00425677	2	NCOR2
4.57621e-08	-0.616366	0.331	0.507	0.000235858	2	SMARCC1
1.10236e-06	-0.617548	0.186	0.338	0.00568157	2	DNAJB11
1.39243e-06	-0.622809	0.226	0.371	0.00717659	2	MEA1
1.35923e-06	-0.626295	0.235	0.393	0.00700547	2	PIR
2.19571e-07	-0.636443	0.241	0.417	0.00113167	2	CDC34
4.75576e-09	-0.637013	0.279	0.477	2.45112e-05	2	XPNPEP1
2.95791e-07	-0.648304	0.18	0.34	0.00152451	2	CEBPZ
1.37337e-06	-0.650408	0.232	0.388	0.00707834	2	CAV1
1.15033e-07	-0.65371	0.201	0.369	0.000592878	2	SH3BGRL3
1.32221e-06	-0.657922	0.18	0.326	0.00681465	2	TBC1D9B
1.81045e-06	-0.663002	0.176	0.32	0.00933105	2	PPP6R3
1.32414e-06	-0.664416	0.204	0.35	0.00682461	2	DCTD
1.5337e-06	-0.664701	0.192	0.34	0.0079047	2	PUM2
1.1593e-07	-0.67325	0.217	0.389	0.000597503	2	SMCHD1
1.57393e-06	-0.676127	0.204	0.35	0.00811203	2	UBE2E3
1.49481e-06	-0.677822	0.155	0.292	0.00770424	2	TES
1.14721e-07	-0.681034	0.248	0.415	0.000591273	2	LIG1
5.20848e-07	-0.681574	0.276	0.428	0.00268445	2	TNKS2
2.29024e-08	-0.683197	0.192	0.367	0.000118039	2	ARL8A
9.76701e-07	-0.693497	0.226	0.376	0.00503392	2	REEP3
5.50248e-07	-0.702752	0.192	0.345	0.00283598	2	CISD1
1.87975e-06	-0.706832	0.195	0.335	0.00968824	2	VOPP1
1.24437e-06	-0.71039	0.186	0.329	0.00641351	2	WDR11
1.22864e-06	-0.71264	0.192	0.338	0.00633239	2	MOK
9.5462e-08	-0.729886	0.164	0.325	0.000492011	2	STAT5B
5.7158e-08	-0.730364	0.18	0.344	0.000294592	2	CELF2
9.40925e-07	-0.73079	0.198	0.348	0.00484953	2	TNK2
2.27432e-08	-0.730828	0.235	0.413	0.000117218	2	PILRB
2.16861e-07	-0.730986	0.251	0.413	0.0011177	2	FCGRT
3.83859e-08	-0.730986	0.217	0.386	0.000197841	2	MGRN1
9.20617e-07	-0.73509	0.17	0.314	0.00474486	2	PHGDH
1.22663e-06	-0.737519	0.149	0.29	0.00632207	2	COG1
1.21196e-06	-0.74069	0.173	0.312	0.00624645	2	SYNGR1
3.0899e-07	-0.743975	0.201	0.352	0.00159253	2	LYPLAL1
1.0646e-08	-0.753342	0.217	0.4	5.48697e-05	2	COL1A1
1.98983e-08	-0.756445	0.201	0.381	0.000102556	2	BAHCC1
3.15521e-07	-0.764051	0.282	0.441	0.0016262	2	ARHGEF1
3.79995e-07	-0.766447	0.139	0.281	0.00195849	2	NPM3
4.41445e-07	-0.772812	0.164	0.317	0.00227521	2	ACTA2
1.98423e-07	-0.780665	0.161	0.313	0.00102267	2	IMMP2L
4.91545e-07	-0.783453	0.173	0.319	0.00253343	2	SEMA6A
1.03882e-06	-0.785302	0.142	0.28	0.00535407	2	FBXO44
2.61081e-08	-0.788352	0.161	0.327	0.000134561	2	ACTL6A
5.77168e-07	-0.789167	0.173	0.318	0.00297472	2	DMXL1
4.44412e-07	-0.790026	0.167	0.313	0.0022905	2	DDX24
6.11873e-07	-0.793772	0.155	0.294	0.0031536	2	AP5Z1
3.59697e-07	-0.795669	0.173	0.324	0.00185388	2	TSC22D4
2.04456e-07	-0.795755	0.115	0.257	0.00105376	2	NCOR1
8.93972e-10	-0.797186	0.251	0.447	4.60753e-06	2	PLEC
9.20082e-07	-0.819615	0.115	0.246	0.0047421	2	MRRF
2.12484e-08	-0.827847	0.17	0.343	0.000109514	2	NDE1
6.08763e-07	-0.838886	0.146	0.285	0.00313756	2	RHNO1
8.58004e-07	-0.857357	0.121	0.253	0.00442215	2	TEX2
7.2088e-07	-0.863167	0.133	0.269	0.00371541	2	ATPAF1
1.30589e-08	-0.863577	0.152	0.319	6.73056e-05	2	KIF1C
7.98052e-08	-0.863963	0.152	0.303	0.000411316	2	CYB561A3
5.31885e-07	-0.869426	0.133	0.271	0.00274133	2	BET1
6.17503e-07	-0.879034	0.164	0.305	0.00318261	2	ANKRD36C
4.80062e-08	-0.891908	0.192	0.355	0.000247424	2	DENND2D
2.23951e-07	-0.895819	0.115	0.253	0.00115424	2	CHD7
1.76735e-07	-0.901996	0.136	0.283	0.000910895	2	TPM1
7.72644e-07	-0.922796	0.13	0.263	0.00398221	2	POLA1
1.83596e-07	-0.941883	0.198	0.348	0.000946253	2	TXNIP
3.75674e-08	-0.952321	0.149	0.305	0.000193622	2	CTSS
1.07081e-07	-0.961253	0.13	0.276	0.000551893	2	ARHGAP17
3.39131e-07	-0.961599	0.115	0.249	0.00174788	2	MTOR
1.7032e-06	-0.971197	0.102	0.223	0.00877828	2	SLC35E2B
6.75998e-07	-0.977325	0.118	0.248	0.00348409	2	SGCD
8.86026e-08	-0.978201	0.115	0.258	0.000456658	2	NELFB
2.07474e-07	-0.982273	0.121	0.258	0.00106932	2	MED8
1.09882e-06	-1.00257	0.108	0.232	0.00566331	2	EXOC6B
1.38672e-06	-1.00437	0.099	0.219	0.00714716	2	TAB1
4.28291e-14	-1.00859	0.861	0.872	2.20741e-10	2	TMSB4X
1.54221e-07	-1.02677	0.121	0.26	0.000794855	2	ARL4A
1.09447e-07	-1.02745	0.155	0.305	0.00056409	2	LIMD2
2.07908e-08	-1.04171	0.09	0.235	0.000107156	2	CHKB
2.94079e-07	-1.09103	0.139	0.273	0.00151568	2	SLK
8.37856e-07	-1.1082	0.096	0.217	0.00431831	2	DMTF1
5.08897e-13	-1.15479	0.17	0.385	2.62286e-09	2	COL3A1
1.93456e-06	-1.17969	0.096	0.211	0.00997072	2	HLA-DPB1
1.54782e-10	-1.19409	0.254	0.446	7.97747e-07	2	CD74
7.61867e-07	-1.22824	0.084	0.201	0.00392666	2	NIN
1.60317e-07	-1.23254	0.093	0.223	0.000826276	2	HLA-DPA1
1.40082e-06	-1.25111	0.059	0.165	0.00721985	2	CKAP2
2.55855e-12	-1.27941	0.149	0.353	1.31868e-08	2	HLA-DRB1
1.58925e-11	-1.33563	0.152	0.344	8.19099e-08	2	HLA-DRA
9.63377e-07	-1.38229	0.059	0.166	0.00496524	2	ARHGEF40
4.43774e-07	-1.39076	0.084	0.202	0.00228721	2	CCNDBP1
1.32148e-06	-1.54245	0.065	0.172	0.00681091	2	ARHGDIB
4.32312e-07	-1.55544	0.062	0.174	0.00222814	2	HLA-DRB5
3.02134e-07	-1.56623	0.077	0.195	0.0015572	2	LSP1
1.39294e-07	-1.58528	0.074	0.197	0.000717922	2	PTGDS
2.55617e-07	-1.58753	0.062	0.178	0.00131745	2	CLU
4.53755e-11	-1.63982	0.136	0.318	2.33865e-07	2	IGLC1
4.87446e-09	-1.78281	0.858	0.799	2.51229e-05	2	IGKC
9.0406e-08	-1.94387	0.074	0.197	0.000465953	2	JCHAIN
1.12081e-15	-2.00683	0.344	0.539	5.77667e-12	2	IGHG1
1.11539e-14	-2.02049	0.08	0.286	5.74872e-11	2	LYZ
3.78358e-17	-2.11812	0.152	0.391	1.95006e-13	2	IGHM
3.83765e-11	-2.26335	0.062	0.224	1.97793e-07	2	IGHA1
9.94667e-07	-2.28056	0.019	0.105	0.00512652	2	LAT
3.47221e-07	-2.29588	0.031	0.13	0.00178958	2	CORO1A
7.18987e-07	-2.35307	0.022	0.111	0.00370566	2	HLA-DQA1
2.81629e-07	-2.45048	0.034	0.134	0.00145152	2	CD37
1.13972e-06	-2.53426	0.028	0.117	0.00587413	2	PTPRC
1.85471e-10	-2.75746	0.043	0.186	9.55919e-07	2	IGHG2
4.37183e-08	-2.85557	0.022	0.126	0.000225324	2	IGHG3
7.39572e-14	-2.89769	0.037	0.215	3.81175e-10	2	CCL19
1.2548e-10	-3.05024	0.028	0.165	6.46725e-07	2	CCL21
5.1675e-08	-3.0665	0.009	0.104	0.000266333	2	TRBC2
4.89868e-10	-3.07618	0.025	0.154	2.52478e-06	2	LTB
4.90822e-07	-3.22561	0.009	0.091	0.0025297	2	HLA-DMB
4.68245e-09	-3.81057	0.006	0.11	2.41334e-05	2	TRAC
5.58286e-10	0.333789	0.984	0.942	2.87741e-06	3	METTL9
5.62565e-21	0.239198	1	0.999	2.89946e-17	3	FTH1
1.14287e-13	0.215609	1	1	5.89037e-10	3	TYRP1
1.38438e-10	0.128139	1	1	7.13509e-07	3	PMEL
1.62696e-10	-0.144889	1	1	8.38533e-07	3	ACTB
4.41277e-08	-0.230643	0.994	0.989	0.000227434	3	ENO1
9.81754e-08	-0.376789	0.822	0.907	0.000505996	3	PYGB
7.26571e-07	-0.420971	0.495	0.666	0.00374475	3	CHMP4B
1.86445e-07	-0.442329	0.566	0.733	0.000960936	3	DUSP4
2.64199e-07	-0.462399	0.437	0.629	0.00136168	3	RBM39
3.08461e-07	-0.462929	0.45	0.627	0.00158981	3	NELFCD
6.25095e-07	-0.463861	0.411	0.598	0.00322174	3	PHF20
1.59396e-08	-0.464165	0.485	0.69	8.21529e-05	3	CDC25B
7.84701e-07	-0.468062	0.466	0.645	0.00404435	3	PSMF1
1.74606e-12	-0.468486	0.819	0.926	8.99919e-09	3	BIRC7
3.19204e-07	-0.483967	0.44	0.632	0.00164517	3	DDRGK1
1.24257e-08	-0.502866	0.515	0.706	6.40422e-05	3	TIMP1
7.24789e-08	-0.513816	0.398	0.587	0.000373556	3	SF3B2
1.90792e-06	-0.559383	0.259	0.409	0.00983341	3	IFITM2
1.28225e-06	-0.561614	0.243	0.402	0.00660871	3	RARS
1.60909e-09	-0.579366	0.625	0.771	8.29326e-06	3	DNAJB1
1.42065e-06	-0.579969	0.262	0.419	0.00732203	3	SUPT5H
1.72061e-06	-0.5891	0.291	0.452	0.00886802	3	PRNP
3.35411e-08	-0.602242	0.534	0.71	0.000172871	3	HSPA1B
1.89315e-11	-0.647687	0.421	0.649	9.7573e-08	3	STAT3
4.73299e-08	-0.664719	0.359	0.53	0.000243938	3	JUNB
1.23995e-07	-0.669069	0.324	0.489	0.000639071	3	ITGA3
1.68244e-06	-0.673078	0.165	0.31	0.00867131	3	PITRM1
2.81314e-10	-0.675126	0.346	0.565	1.44989e-06	3	CDKN1A
1.75065e-07	-0.713938	0.288	0.458	0.000902288	3	FN1
4.24109e-07	-0.716657	0.21	0.37	0.00218586	3	EHBP1L1
8.49017e-07	-0.729025	0.197	0.348	0.00437583	3	IRF4
1.01199e-06	-0.750984	0.204	0.355	0.00521578	3	EPHB4
4.63839e-08	-0.753505	0.21	0.384	0.000239063	3	DNAJC5
1.91005e-06	-0.770035	0.175	0.314	0.00984441	3	PPFIA1
5.43819e-07	-0.782489	0.21	0.362	0.00280284	3	PPAN
1.1034e-06	-0.796287	0.168	0.311	0.00568693	3	MRGBP
7.59908e-07	-0.822602	0.197	0.342	0.00391657	3	ZFAND3
1.25572e-06	-0.827258	0.162	0.3	0.006472	3	YTHDC1
6.14909e-08	-0.843422	0.194	0.358	0.000316924	3	PSMB8
4.19821e-09	-0.846961	0.275	0.464	2.16376e-05	3	HSPA1A
6.8484e-07	-0.880142	0.159	0.3	0.00352966	3	HK1
1.98854e-10	-0.894604	0.327	0.525	1.02489e-06	3	SPP1
2.75119e-08	-0.926184	0.165	0.329	0.000141796	3	MSTO1
1.82806e-07	-0.928112	0.172	0.323	0.00094218	3	NPEPPS
8.11831e-07	-0.937441	0.159	0.298	0.00418418	3	ASH1L
1.90786e-06	-0.967961	0.133	0.26	0.0098331	3	AFF4
1.63208e-06	-1.02284	0.074	0.19	0.00841177	3	AKAP8
9.02491e-07	-1.07606	0.152	0.283	0.00465144	3	LTBP3
1.62596e-07	-1.08826	0.123	0.263	0.000838021	3	SGTA
8.73198e-07	-1.10156	0.11	0.237	0.00450046	3	TPP2
7.54564e-07	-1.13826	0.104	0.229	0.00388903	3	DPH2
1.54943e-06	-1.15304	0.074	0.189	0.00798577	3	SEC16A
9.73894e-07	-1.22807	0.087	0.207	0.00501945	3	FBLN2
3.0963e-07	-1.25015	0.104	0.233	0.00159583	3	SPRY1
1.54335e-10	-1.25066	0.168	0.352	7.95443e-07	3	PLIN2
3.59804e-22	-1.2687	0.712	0.832	1.85443e-18	3	VGF
5.96903e-07	-1.27246	0.084	0.206	0.00307644	3	FAM83D
1.60976e-06	-1.38447	0.081	0.193	0.00829672	3	LSP1
7.41274e-50	6.78916	0.241	0.003	3.82053e-46	4	TRAJ38
3.95125e-82	5.94188	0.586	0.017	2.03647e-78	4	TRAJ17
3.34136e-50	5.44356	0.414	0.014	1.72214e-46	4	TRAJ28
7.60276e-74	5.44235	0.724	0.033	3.91846e-70	4	CD3D
3.28962e-69	5.37629	0.828	0.052	1.69547e-65	4	IL7R
1.77619e-60	5.27854	0.759	0.05	9.15449e-57	4	TRBC1
2.96098e-47	5.22728	0.552	0.031	1.52609e-43	4	SELL
1.43135e-28	5.19563	0.345	0.02	7.37716e-25	4	TRAJ36
4.89107e-29	5.17618	0.31	0.016	2.52086e-25	4	CD6
2.30027e-32	5.12348	0.379	0.021	1.18556e-28	4	CD96
2.50244e-45	5.07978	0.586	0.038	1.28976e-41	4	DGKA
1.65346e-41	5.07295	0.345	0.012	8.52193e-38	4	TRAJ6
5.25885e-25	5.04807	0.31	0.019	2.71041e-21	4	TRAJ3
1.88849e-53	4.97624	0.621	0.035	9.73328e-50	4	SEPTIN1
4.75276e-52	4.95881	0.69	0.046	2.44957e-48	4	IKZF1
1.73484e-43	4.82984	0.897	0.117	8.94137e-40	4	LTB
4.7493e-36	4.82207	0.414	0.023	2.44779e-32	4	TRAJ16
6.48071e-36	4.82207	0.414	0.023	3.34016e-32	4	RASGRP2
1.77287e-47	4.81068	0.655	0.046	9.13735e-44	4	FYB1
9.40377e-28	4.75857	0.414	0.031	4.84671e-24	4	IL2RG
5.10795e-37	4.70343	0.448	0.026	2.63264e-33	4	RHOF
2.69821e-34	4.62171	0.69	0.081	1.39066e-30	4	TRAC
4.47923e-37	4.61404	0.862	0.127	2.30859e-33	4	CCL21
3.64129e-22	4.55904	0.345	0.027	1.87672e-18	4	SPOCK2
2.46826e-18	4.48103	0.172	0.008	1.27214e-14	4	ZBP1
7.18059e-28	4.45867	0.655	0.091	3.70088e-24	4	PTPRC
1.99494e-32	4.45385	0.586	0.058	1.02819e-28	4	LBH
2.87682e-21	4.44541	0.31	0.023	1.48271e-17	4	TRAJ34
5.05492e-37	4.41802	0.552	0.041	2.60531e-33	4	ARHGAP9
1.82389e-13	4.34587	0.241	0.023	9.40034e-10	4	TRAJ29
1.21151e-34	4.34466	0.552	0.045	6.2441e-31	4	GMFG
2.43841e-18	4.1898	0.345	0.033	1.25676e-14	4	ACAP1
2.52871e-27	4.14338	0.69	0.102	1.3033e-23	4	CORO1A
4.96267e-28	4.12891	0.621	0.078	2.55776e-24	4	TRBC2
1.18808e-25	4.10089	0.414	0.034	6.12336e-22	4	CCDC69
1.37501e-25	4.08872	0.414	0.034	7.0868e-22	4	GIMAP4
4.51396e-24	3.96478	0.586	0.082	2.3265e-20	4	TMC8
5.22598e-21	3.95265	0.345	0.028	2.69347e-17	4	SEMA4D
6.29594e-24	3.91335	0.448	0.043	3.24493e-20	4	RIPOR2
8.71691e-23	3.82568	0.586	0.087	4.49269e-19	4	IL32
2.30464e-11	3.82392	0.414	0.083	1.18781e-07	4	LAT
3.70006e-16	3.77696	0.586	0.128	1.90701e-12	4	RAC2
5.86947e-25	3.73561	0.552	0.066	3.02512e-21	4	CD52
1.28743e-28	3.69096	0.724	0.105	6.6354e-25	4	CD37
8.48306e-08	3.67368	0.241	0.04	0.000437217	4	LPXN
3.88626e-13	3.67036	0.414	0.072	2.00298e-09	4	FOXP1
1.40828e-16	3.64935	0.621	0.144	7.25828e-13	4	ARHGDIB
7.86816e-15	3.63973	0.517	0.104	4.05525e-11	4	STK17B
6.26223e-13	3.58674	0.379	0.059	3.22755e-09	4	ARHGAP4
8.85289e-12	3.57414	0.379	0.065	4.56278e-08	4	LCP1
5.07365e-14	3.55727	0.345	0.044	2.61496e-10	4	SEL1L3
1.28901e-12	3.40422	0.448	0.087	6.64354e-09	4	AKNA
4.29307e-20	3.32576	0.724	0.166	2.21265e-16	4	PTGDS
1.57841e-16	3.27887	0.655	0.163	8.13515e-13	4	LAPTM5
1.44727e-16	3.27055	0.69	0.174	7.45923e-13	4	CCL19
6.39922e-21	3.15304	0.862	0.267	3.29816e-17	4	EVL
6.90027e-12	3.14332	0.552	0.15	3.5564e-08	4	CLU
1.21844e-19	3.08066	0.724	0.164	6.27982e-16	4	LSP1
1.69423e-10	2.91335	0.552	0.164	8.73206e-07	4	CLEC2D
6.75832e-07	2.90139	0.414	0.133	0.00348324	4	ARHGAP45
6.03604e-09	2.89607	0.483	0.148	3.11098e-05	4	HLA-DRB5
4.39637e-07	2.88609	0.31	0.073	0.00226589	4	PDE7A
5.50107e-20	2.81977	1	0.867	2.83525e-16	4	TMSB4X
7.66477e-10	2.77861	0.448	0.112	3.95042e-06	4	C7
7.2095e-10	2.72022	0.483	0.125	3.71578e-06	4	SEPTIN6
1.07782e-10	2.71212	0.724	0.309	5.5551e-07	4	HLA-DRB1
1.92593e-07	2.67111	0.345	0.084	0.000992625	4	CXCL12
2.10981e-09	2.57414	0.31	0.052	1.0874e-05	4	CIITA
1.18633e-06	2.55368	0.379	0.107	0.00611435	4	TMEM173
6.51975e-13	2.5315	0.69	0.225	3.36028e-09	4	SKAP1
2.67029e-10	2.50658	0.69	0.314	1.37627e-06	4	TXNIP
5.91267e-10	2.50022	0.759	0.406	3.04739e-06	4	ARHGEF1
2.25023e-13	2.49736	0.793	0.301	1.15977e-09	4	HLA-DRA
4.43787e-07	2.47038	0.586	0.272	0.00228728	4	LIMD2
4.41201e-12	2.46676	0.655	0.218	2.27395e-08	4	SMAP2
3.076e-10	2.41064	0.621	0.204	1.58537e-06	4	SLFN5
3.59232e-08	2.40866	0.655	0.319	0.000185148	4	DENND2D
1.39839e-10	2.39261	0.655	0.235	7.20729e-07	4	CARD8
2.80051e-10	2.33869	0.759	0.405	1.44338e-06	4	CD74
1.66046e-07	2.27008	0.483	0.153	0.000855803	4	TRIM22
1.55409e-06	2.21157	0.517	0.21	0.00800976	4	SUN2
5.37705e-07	2.19563	0.552	0.242	0.00277133	4	GRK2
1.29667e-08	2.16815	0.621	0.242	6.68303e-05	4	LYZ
1.5677e-11	2.0313	0.793	0.339	8.07992e-08	4	IGHM
7.95926e-08	2.01259	0.552	0.193	0.00041022	4	HLA-DPA1
1.45534e-13	1.63611	1	0.955	7.50085e-10	4	B2M
1.4528e-13	1.5542	1	0.807	7.48775e-10	4	IGKC
3.76486e-09	1.44771	0.966	0.732	1.94041e-05	4	ITM2B
8.17146e-09	1.40598	0.897	0.644	4.21157e-05	4	HLA-C
2.29369e-08	1.06558	1	0.959	0.000118217	4	NOP53
8.93545e-07	-0.392192	1	1	0.00460533	4	UBC
2.97914e-09	-0.559532	1	1	1.53545e-05	4	CD63
1.65195e-06	-0.572996	1	1	0.00851413	4	SQSTM1
9.61321e-08	-0.627871	1	1	0.000495465	4	PSAP
1.1855e-06	-0.665845	1	0.997	0.00611005	4	QPCT
1.45621e-06	-0.702167	1	0.988	0.00750529	4	ATP5F1E
3.99081e-12	-0.711076	1	0.999	2.05687e-08	4	FTH1
1.49203e-12	-0.727803	1	1	7.68992e-09	4	PMEL
3.94928e-07	-0.744963	1	0.99	0.00203546	4	MYO10
1.16243e-07	-0.791116	0.966	0.998	0.000599115	4	ASAH1
6.1956e-07	-0.819169	0.966	0.986	0.00319321	4	SNCA
9.53091e-07	-0.822062	0.931	0.975	0.00491223	4	NME2
3.48608e-13	-0.838919	1	1	1.79673e-09	4	TYRP1
3.07016e-13	-0.84399	1	1	1.58236e-09	4	SDCBP
2.00655e-13	-0.849694	1	1	1.03418e-09	4	S100A6
1.75939e-09	-0.880296	1	0.997	9.06787e-06	4	ATP1A1
8.48315e-08	-0.8827	0.966	0.986	0.000437221	4	CTSB
7.64066e-07	-0.887128	0.897	0.975	0.003938	4	LGALS3
2.74858e-09	-0.923576	1	0.999	1.41662e-05	4	HSPB1
1.43257e-10	-0.957802	0.966	0.999	7.38349e-07	4	VAT1
5.93967e-07	-0.960167	0.897	0.965	0.00306131	4	CTSK
7.26763e-07	-0.983726	0.966	0.949	0.00374573	4	METTL9
1.50635e-07	-0.985104	0.966	0.968	0.000776371	4	TYR
4.53515e-07	-1.0009	0.897	0.967	0.00233742	4	TRPM1
2.14431e-09	-1.11245	0.897	0.986	1.10518e-05	4	UGCG
2.9286e-08	-1.15084	0.931	0.95	0.00015094	4	PRKD3
1.15778e-06	-4.44044	0	0.478	0.00596721	4	NEDD4L
7.82417e-07	-4.45487	0	0.488	0.00403258	4	SLC6A15
3.54525e-07	1.64439	0.112	0.032	0.00182722	5	CXCL9
2.60953e-16	1.39768	0.313	0.098	1.34495e-12	5	IGHG4
2.96833e-11	1.29863	0.223	0.072	1.52988e-07	5	IGKV4-1
1.05427e-09	1.22966	0.196	0.064	5.43373e-06	5	FOXP1
1.45654e-08	1.16187	0.251	0.104	7.50702e-05	5	EVI5
5.19523e-07	1.13915	0.257	0.122	0.00267762	5	PBDC1
3.28942e-09	1.11081	0.318	0.144	1.69537e-05	5	PEPD
3.81692e-07	1.06876	0.251	0.115	0.00196724	5	GSTA4
2.34669e-08	1.05015	0.285	0.127	0.000120949	5	LRCH1
1.63687e-08	1.03586	0.318	0.15	8.43644e-05	5	ETV1
7.85073e-07	1.02873	0.302	0.158	0.00404627	5	SGK3
6.96496e-07	1.01814	0.218	0.094	0.00358974	5	SETD1B
2.9548e-09	1.0038	0.324	0.145	1.5229e-05	5	STRBP
2.92497e-07	1.00059	0.302	0.15	0.00150753	5	CARHSP1
2.69639e-08	0.983356	0.296	0.134	0.000138972	5	CPN1
7.23084e-07	0.974963	0.274	0.133	0.00372678	5	POPDC3
1.56031e-08	0.973451	0.363	0.181	8.04182e-05	5	TPD52
7.78648e-08	0.969226	0.313	0.151	0.000401315	5	TGFBI
2.63661e-07	0.969226	0.318	0.162	0.00135891	5	ZNF24
7.89413e-08	0.961613	0.313	0.15	0.000406863	5	TRIP13
5.66053e-07	0.961364	0.302	0.153	0.00291744	5	UNC93B1
6.27787e-09	0.959445	0.257	0.102	3.23561e-05	5	C7
1.85024e-06	0.956459	0.263	0.129	0.00953612	5	ZDHHC7
1.10545e-08	0.952575	0.341	0.162	5.69749e-05	5	ARL6IP6
1.61096e-24	0.950268	0.62	0.246	8.3029e-21	5	IGLC1
4.01436e-07	0.94235	0.313	0.159	0.002069	5	TMEM255A
3.63949e-09	0.940958	0.363	0.174	1.87579e-05	5	PREPL
3.17568e-08	0.937517	0.313	0.146	0.000163675	5	GAS7
1.09042e-06	0.9323	0.291	0.147	0.00562003	5	RIN3
7.69239e-07	0.931556	0.307	0.158	0.00396466	5	EIF5A2
1.58805e-06	0.927313	0.257	0.124	0.0081848	5	PERP
8.49202e-08	0.925804	0.374	0.199	0.000437679	5	GTF2A1
2.48282e-07	0.923422	0.318	0.16	0.00127964	5	TSPAN17
2.48148e-07	0.921674	0.313	0.155	0.00127895	5	FKBP5
1.85895e-06	0.918953	0.246	0.116	0.00958102	5	MAML2
2.91059e-07	0.918506	0.302	0.148	0.00150012	5	TIMM17B
2.52418e-07	0.916759	0.291	0.138	0.00130096	5	NID1
4.01806e-07	0.916759	0.33	0.171	0.00207091	5	PIGS
9.24533e-07	0.915149	0.313	0.162	0.00476504	5	PIGN
1.11723e-10	0.906762	0.497	0.261	5.7582e-07	5	SYAP1
2.25282e-07	0.904686	0.33	0.169	0.0011611	5	HNRNPK
1.72715e-08	0.904246	0.391	0.203	8.90173e-05	5	SLC37A4
4.18766e-10	0.902112	0.464	0.243	2.15832e-06	5	NUP93
9.92722e-08	0.895697	0.341	0.172	0.000511649	5	PTPN13
2.8712e-10	0.894914	0.469	0.243	1.47982e-06	5	FAM136A
3.98963e-08	0.891224	0.346	0.171	0.000205625	5	CLPX
4.10521e-07	0.889892	0.296	0.145	0.00211583	5	ASH2L
1.375e-06	0.887612	0.302	0.155	0.00708674	5	TMEM104
1.22323e-07	0.886544	0.385	0.209	0.000630451	5	CCNB2
3.0583e-08	0.881353	0.358	0.178	0.000157625	5	DTL
7.57679e-08	0.880417	0.346	0.174	0.000390508	5	DAB2IP
1.00016e-06	0.878026	0.318	0.165	0.00515484	5	LGALS8
1.32307e-06	0.866133	0.318	0.169	0.00681912	5	GLB1
2.56956e-07	0.862584	0.385	0.214	0.00132435	5	PPP2R2A
1.00749e-08	0.861166	0.447	0.244	5.19259e-05	5	VIRMA
1.09812e-07	0.856458	0.38	0.203	0.00056597	5	DNAJC3
6.76495e-07	0.853749	0.318	0.163	0.00348666	5	IKBIP
2.92099e-09	0.853051	0.469	0.254	1.50548e-05	5	CTSS
2.28226e-07	0.851803	0.369	0.198	0.00117628	5	TBCE.1
3.31947e-08	0.845955	0.369	0.185	0.000171085	5	COG4
1.07896e-08	0.843695	0.419	0.22	5.56099e-05	5	GLTP
6.08392e-07	0.842169	0.335	0.176	0.00313565	5	CREG1
1.9785e-07	0.841136	0.352	0.182	0.00101972	5	CZIB
2.85527e-07	0.840307	0.324	0.162	0.00147161	5	MOCS2
1.0245e-06	0.837123	0.346	0.187	0.00528025	5	NANOS1
1.90341e-06	0.832291	0.352	0.197	0.00981017	5	TLE1
6.11685e-09	0.831029	0.475	0.265	3.15262e-05	5	PARVA
4.53255e-08	0.829962	0.425	0.232	0.000233607	5	CNOT8
6.34102e-07	0.82913	0.346	0.185	0.00326816	5	NOMO1
8.2931e-07	0.828364	0.363	0.2	0.00427426	5	EZR
2.87359e-07	0.813221	0.341	0.176	0.00148105	5	PDCD4
1.00792e-06	0.813047	0.341	0.182	0.00519482	5	RBL2
2.32153e-08	0.806025	0.391	0.2	0.000119652	5	WEE1
9.18098e-07	0.804549	0.341	0.18	0.00473187	5	HGSNAT
1.13068e-06	0.798845	0.369	0.205	0.00582753	5	MMGT1
1.05202e-12	0.796849	0.732	0.466	5.42213e-09	5	APCDD1
1.82097e-07	0.795434	0.413	0.23	0.000938526	5	ARHGAP17
6.51216e-10	0.789118	0.536	0.299	3.35637e-06	5	BAX
1.02873e-08	0.788394	0.48	0.271	5.30208e-05	5	SEMA6A
1.32842e-07	0.783276	0.402	0.218	0.000684669	5	TMEM134
4.87265e-08	0.782381	0.441	0.244	0.000251137	5	PAFAH1B3
7.20976e-09	0.781282	0.497	0.28	3.71591e-05	5	PTOV1
3.27452e-08	0.781195	0.425	0.226	0.000168769	5	MALSU1
9.29032e-07	0.778561	0.374	0.208	0.00478823	5	PLCB4
1.15868e-06	0.776581	0.346	0.187	0.00597184	5	WDR81
5.04717e-07	0.776098	0.397	0.223	0.00260131	5	FOPNL
2.47256e-07	0.772534	0.419	0.236	0.00127436	5	CBR1
3.10835e-08	0.771675	0.469	0.264	0.000160204	5	CTDSP1
3.2803e-08	0.770369	0.464	0.261	0.000169067	5	SYF2
1.36461e-08	0.769917	0.514	0.304	7.03321e-05	5	GM2A
5.16162e-08	0.768928	0.447	0.249	0.00026603	5	LEPROT
1.66019e-06	0.764344	0.363	0.202	0.00855664	5	MBD6
2.98985e-08	0.761846	0.441	0.239	0.000154097	5	ITPK1
8.83715e-09	0.757006	0.52	0.299	4.55467e-05	5	MMP24OS
7.86574e-07	0.756945	0.38	0.209	0.004054	5	DGUOK
1.09372e-08	0.756497	0.492	0.278	5.63704e-05	5	HIST1H2AI
1.16157e-06	0.756469	0.419	0.248	0.00598674	5	TMEM30A
3.72825e-07	0.753329	0.464	0.28	0.00192154	5	TCEAL8
4.09638e-07	0.752372	0.419	0.237	0.00211128	5	CNIH1
4.29884e-10	0.751547	0.603	0.354	2.21562e-06	5	HMCN1
2.49177e-08	0.750331	0.514	0.3	0.000128426	5	IRF4
5.43839e-08	0.749319	0.413	0.218	0.000280295	5	DUSP12
6.28282e-08	0.748457	0.514	0.311	0.000323817	5	ZCRB1
1.47069e-09	0.746366	0.575	0.342	7.57994e-06	5	FABP5
7.92793e-07	0.745308	0.419	0.244	0.00408606	5	PAQR4
1.71698e-06	0.742634	0.43	0.26	0.00884933	5	MAPK1IP1L
3.31086e-09	0.741647	0.525	0.298	1.70642e-05	5	ETFA
2.89021e-08	0.740602	0.464	0.257	0.000148962	5	DLL3
3.00535e-08	0.739492	0.503	0.291	0.000154896	5	GNAQ
2.21019e-07	0.739106	0.514	0.323	0.00113913	5	R3HCC1L
3.05629e-07	0.731976	0.436	0.249	0.00157521	5	PGP
4.59336e-07	0.730635	0.447	0.263	0.00236742	5	DCTPP1
2.57515e-07	0.727457	0.408	0.224	0.00132723	5	PRKCE
1.80696e-06	0.727122	0.408	0.24	0.0093131	5	NIT2
5.79985e-08	0.72637	0.207	0.078	0.000298924	5	TRAC
3.93572e-15	0.723066	0.413	0.156	2.02847e-11	5	CCL19
8.70546e-08	0.722413	0.48	0.278	0.00044868	5	HIPK2
1.86222e-07	0.718115	0.425	0.236	0.000959788	5	PLEKHA8
1.41823e-06	0.718057	0.458	0.282	0.00730957	5	RETREG3
1.44198e-08	0.714752	0.581	0.361	7.43197e-05	5	SLC35B2
8.56282e-08	0.710516	0.464	0.263	0.000441328	5	SLC7A5
1.24696e-06	0.701746	0.408	0.235	0.00642683	5	GNS
9.51241e-07	0.70103	0.43	0.25	0.0049027	5	EDEM2
6.48145e-07	0.698947	0.469	0.284	0.00334054	5	DAPK1
1.19762e-07	0.697924	0.508	0.303	0.000617253	5	SEC22B
7.4528e-07	0.695661	0.43	0.25	0.00384117	5	XPO7
9.8301e-07	0.690111	0.391	0.218	0.00506643	5	NDUFC2
6.51861e-07	0.685861	0.475	0.285	0.00335969	5	FSTL5
1.20843e-07	0.684585	0.587	0.398	0.000622827	5	SEMA3C
7.75729e-07	0.67972	0.436	0.252	0.00399811	5	DLG1
5.24427e-07	0.67972	0.497	0.304	0.0027029	5	UBE2E3
6.52528e-07	0.67831	0.453	0.263	0.00336313	5	TNFRSF19
1.84826e-07	0.677498	0.514	0.313	0.000952591	5	NT5C3B
1.59926e-06	0.674684	0.469	0.287	0.00824259	5	COMMD4
3.6223e-07	0.663952	0.436	0.246	0.00186694	5	PLK1
8.11659e-07	0.663909	0.52	0.337	0.00418329	5	SCP2
7.49795e-09	0.663418	0.592	0.355	3.86444e-05	5	SFXN3
6.44167e-07	0.66326	0.469	0.28	0.00332004	5	TUSC3
7.63414e-09	0.663091	0.609	0.379	3.93463e-05	5	HIST1H2BL
6.12851e-07	0.661883	0.464	0.273	0.00315863	5	MKI67
3.59877e-07	0.65951	0.497	0.303	0.00185481	5	DCTD
3.5866e-07	0.657215	0.542	0.339	0.00184854	5	CAV1
1.77474e-06	0.656068	0.486	0.299	0.00914703	5	CYB5R1
1.8062e-07	0.655634	0.492	0.289	0.000930913	5	DAXX
2.62666e-07	0.654629	0.508	0.306	0.00135378	5	CDK16
2.711e-09	0.653724	0.631	0.381	1.39725e-05	5	CHL1
6.35341e-08	0.651799	0.514	0.295	0.000327455	5	CISD1
3.6364e-07	0.647298	0.547	0.343	0.0018742	5	YKT6
1.45272e-06	0.645457	0.43	0.246	0.00748733	5	KIF23
1.54881e-07	0.643943	0.497	0.29	0.000798256	5	DHCR24
6.61832e-11	0.643257	0.469	0.223	3.41108e-07	5	LYZ
4.58901e-07	0.641781	0.508	0.309	0.00236517	5	PSMB8
2.48928e-07	0.638828	0.52	0.311	0.00128297	5	VEZF1
1.46532e-08	0.633713	0.693	0.472	7.55226e-05	5	MZT1
3.87153e-07	0.632414	0.514	0.316	0.00199539	5	PI15
4.94685e-07	0.63181	0.48	0.285	0.00254961	5	MFF
2.24244e-07	0.6303	0.531	0.322	0.00115575	5	UBR5
9.54574e-07	0.627928	0.464	0.275	0.00491987	5	PPP6R3
3.61157e-08	0.62538	0.564	0.344	0.00018614	5	IGSF11
4.50999e-08	0.624912	0.525	0.302	0.000232445	5	LYPLAL1
4.39365e-12	0.623653	0.374	0.152	2.26449e-08	5	JCHAIN
6.48751e-10	0.620684	0.693	0.429	3.34366e-06	5	IFI27
2.16386e-08	0.614885	0.654	0.43	0.000111525	5	GGH
3.53855e-07	0.614706	0.564	0.361	0.00182377	5	CCND1
6.21728e-17	0.61369	0.447	0.166	3.20438e-13	5	IGHA1
3.7619e-09	0.603642	0.693	0.429	1.93888e-05	5	LY6E
1.67664e-06	0.600412	0.503	0.309	0.00864138	5	SOCS6
7.58707e-07	0.598419	0.559	0.361	0.00391037	5	TRIM2
1.38649e-06	0.594453	0.492	0.303	0.00714596	5	SIGIRR
9.23674e-07	0.588337	0.514	0.314	0.00476062	5	KLHL7
1.33785e-07	0.583438	0.698	0.476	0.000689529	5	C12orf57
1.87574e-06	0.581359	0.559	0.359	0.00966756	5	SNX8
1.15481e-06	0.580564	0.564	0.372	0.00595188	5	SAMM50
6.48897e-07	0.577578	0.52	0.317	0.00334441	5	FBXW2
7.72251e-07	0.574367	0.458	0.263	0.00398018	5	RNF115
1.71797e-06	0.573483	0.57	0.38	0.0088544	5	CALD1
1.14279e-06	0.570445	0.547	0.342	0.00588992	5	PSMD14
2.22448e-08	0.564124	0.682	0.428	0.00011465	5	FSTL1
1.59083e-06	0.561348	0.48	0.287	0.00819913	5	TXNDC5
1.5556e-06	0.558451	0.531	0.33	0.00801758	5	CLPP
1.00696e-06	0.550252	0.553	0.342	0.00518989	5	CDK1
1.41338e-09	0.53905	0.324	0.141	7.28457e-06	5	IGHG2
4.23824e-07	0.538881	0.553	0.335	0.00218439	5	LAP3
1.72437e-06	0.53267	0.542	0.336	0.0088874	5	ATP5PB
2.85489e-07	0.525663	0.726	0.525	0.00147141	5	ST3GAL5
2.23474e-07	0.517758	0.682	0.465	0.00115178	5	MAP3K11
3.71237e-08	0.516918	0.514	0.285	0.000191335	5	HLA-DRA
1.68358e-06	0.507394	0.682	0.469	0.00867716	5	DCXR
6.98117e-31	0.500943	0.894	0.459	3.5981e-27	5	IGHG1
1.76192e-45	0.496116	1	0.788	9.08092e-42	5	IGKC
6.97762e-17	0.453848	0.659	0.311	3.59626e-13	5	IGHM
1.33822e-06	0.429818	0.816	0.703	0.00689718	5	AZIN1
5.75554e-07	0.391521	0.603	0.375	0.00296641	5	COL1A2
1.96788e-11	0.39069	0.983	0.986	1.01425e-07	5	ANXA5
1.52928e-26	0.36292	1	1	7.88191e-23	5	TYRP1
2.41303e-12	0.312363	1	0.996	1.24367e-08	5	QPCT
1.63423e-22	0.30423	1	1	8.42281e-19	5	CD63
5.41667e-11	0.299681	0.994	0.998	2.79175e-07	5	ASAH1
4.52613e-11	0.294713	0.994	0.997	2.33276e-07	5	TOMM7
7.80438e-19	0.272684	1	0.999	4.02238e-15	5	FTH1
1.77746e-06	0.262204	0.994	0.987	0.00916102	5	BRI3
9.08803e-13	0.230934	1	1	4.68397e-09	5	SDCBP
1.35602e-19	0.21537	1	1	6.98895e-16	5	PMEL
6.99754e-08	0.199391	0.654	0.383	0.000360653	5	CD74
4.09888e-09	0.171806	1	1	2.11256e-05	5	HSPA8
8.71883e-11	0.101114	0.978	0.857	4.49368e-07	5	TMSB4X
1.75504e-06	-0.450661	0.821	0.9	0.0090455	5	PYGB
6.09488e-25	-1.6506	0.542	0.841	3.1413e-21	5	VGF
1.31459e-09	3.56797	0.322	0.099	6.77542e-06	6	IGHG3
3.21782e-18	3.11122	0.441	0.104	1.65847e-14	6	CD37
2.62102e-29	3.02592	1	0.803	1.35088e-25	6	IGKC
1.53749e-11	2.97737	0.22	0.038	7.92423e-08	6	SEPTIN1
7.79225e-14	2.93359	0.22	0.032	4.01613e-10	6	ACAP1
6.97124e-29	2.88813	1	0.486	3.59297e-25	6	IGHG1
3.57939e-10	2.85177	0.339	0.104	1.84482e-06	6	CORO1A
1.65637e-09	2.81371	0.254	0.064	8.53692e-06	6	LCP1
5.714e-22	2.80271	0.508	0.117	2.945e-18	6	LTB
3.23594e-17	2.77936	0.695	0.335	1.6678e-13	6	IGHM
1.33684e-10	2.74459	0.22	0.041	6.89006e-07	6	DGKA
3.36027e-14	2.69519	0.288	0.054	1.73188e-10	6	TRBC1
7.00926e-10	2.6762	0.153	0.022	3.61257e-06	6	TRAJ29
1.96158e-13	2.64101	0.288	0.057	1.011e-09	6	IL7R
6.35362e-13	2.64101	0.22	0.034	3.27465e-09	6	SELL
3.72136e-26	2.59571	0.847	0.395	1.91799e-22	6	CD74
2.8105e-08	2.56511	0.407	0.174	0.000144853	6	CCL19
9.83506e-11	2.56267	0.458	0.185	5.06899e-07	6	IGHA1
9.70571e-10	2.5242	0.271	0.067	5.00232e-06	6	CD52
5.42676e-07	2.49761	0.373	0.167	0.00279695	6	JCHAIN
1.56589e-09	2.49375	0.424	0.166	8.07059e-06	6	PTGDS
2.70529e-08	2.49361	0.237	0.061	0.000139431	6	LBH
1.36449e-06	2.46146	0.119	0.021	0.00703257	6	TRAJ3
7.1159e-07	2.45786	0.186	0.045	0.00366753	6	ARHGAP9
1.45051e-11	2.44241	0.407	0.13	7.47594e-08	6	CCL21
1.3157e-06	2.39006	0.254	0.085	0.00678111	6	TRAC
6.88473e-31	2.37047	1	0.865	3.54839e-27	6	TMSB4X
4.46229e-10	2.34151	0.322	0.093	2.29986e-06	6	PTPRC
4.22507e-07	2.29154	0.203	0.051	0.0021776	6	CIITA
8.54946e-07	2.11341	0.288	0.105	0.00440639	6	STK17B
1.40338e-06	1.91652	0.339	0.146	0.00723302	6	ARHGDIB
3.58371e-07	1.90878	0.508	0.302	0.00184704	6	HLA-DRA
3.31431e-07	1.90871	0.508	0.309	0.00170819	6	HLA-DRB1
1.7248e-15	1.05019	1	0.954	8.88962e-12	6	B2M
1.4623e-08	0.89839	0.966	0.638	7.5367e-05	6	HLA-C
6.80228e-08	-0.30871	1	0.999	0.000350589	6	FTH1
5.81494e-07	-0.397064	1	0.998	0.00299702	6	ASAH1
6.55872e-07	-0.415278	1	0.997	0.00338037	6	TOMM7
4.95125e-07	-0.42211	1	0.999	0.00255188	6	CTNNB1
9.84932e-12	-0.457907	1	1	5.07634e-08	6	TYRP1
3.22561e-07	-0.467442	1	0.996	0.00166248	6	MIF
1.28598e-13	-0.467869	1	1	6.62793e-10	6	S100A6
3.63685e-18	-0.468731	1	1	1.87443e-14	6	PMEL
4.59082e-14	-0.470277	1	1	2.36611e-10	6	CD63
1.11813e-13	-0.484218	1	1	5.76286e-10	6	SDCBP
4.27031e-07	-0.48901	0.983	0.99	0.00220092	6	MYO10
1.01702e-06	-0.491562	1	0.999	0.00524171	6	HSPB1
1.44634e-06	-0.537221	0.983	0.972	0.00745442	6	SGK1
2.61259e-08	-0.537325	1	0.993	0.000134653	6	SCD
1.75107e-07	-0.537764	1	0.985	0.000902502	6	CTSB
2.01536e-09	-0.547659	1	0.996	1.03872e-05	6	ATP1A1
5.16412e-09	-0.573741	1	0.992	2.66159e-05	6	NBL1
1.25463e-10	-0.582625	1	0.996	6.46634e-07	6	TIMP2
3.48059e-09	-0.604078	1	0.987	1.7939e-05	6	NME1
1.11626e-08	-0.619161	1	0.985	5.7532e-05	6	SNCA
1.72696e-06	-0.619673	0.966	0.949	0.00890077	6	METTL9
5.5224e-10	-0.6217	1	0.995	2.84625e-06	6	PSMA7
1.53823e-06	-0.636441	0.983	0.921	0.00792806	6	S100B
1.49811e-06	-0.64799	0.983	0.928	0.00772124	6	ADGRG1
1.39687e-06	-0.653937	0.983	0.94	0.00719949	6	GDF15
1.62446e-13	-0.666987	1	0.999	8.37249e-10	6	VAT1
1.33275e-06	-0.670754	0.966	0.89	0.006869	6	TBC1D7
3.09218e-07	-0.689524	0.983	0.933	0.00159371	6	ARF1
1.34026e-06	-0.707377	1	0.901	0.00690768	6	CAPG
3.27928e-08	-0.783229	0.949	0.9	0.000169014	6	GPR137B
1.16977e-06	-1.10929	0.102	0.471	0.00602901	6	GTF3A
1.09851e-06	-1.13115	0.085	0.451	0.00566174	6	ZNF655
1.06785e-06	-1.23132	0.102	0.457	0.00550368	6	TYMS
1.76896e-06	-1.23898	0.119	0.477	0.00911723	6	BMPR2
1.80657e-06	-1.26976	0.102	0.462	0.00931107	6	PLCG1
1.10273e-06	-1.27586	0.102	0.468	0.00568349	6	NCBP2
1.54759e-06	-1.29523	0.102	0.471	0.00797629	6	C8orf33
8.76053e-07	-1.33378	0.068	0.424	0.00451518	6	HPCAL1
1.75042e-06	-1.33378	0.102	0.459	0.00902167	6	VDAC2
1.28543e-06	-1.3437	0.102	0.454	0.00662511	6	LARP1
1.67276e-06	-1.35967	0.102	0.466	0.0086214	6	TXN2
5.33818e-07	-1.36698	0.102	0.465	0.0027513	6	TRIM28
1.53669e-06	-1.36981	0.102	0.459	0.0079201	6	TMX2
1.91776e-06	-1.37841	0.186	0.517	0.00988412	6	DYNLL2
1.84619e-06	-1.4089	0.136	0.477	0.00951528	6	NFE2L2
7.70692e-07	-1.423	0.102	0.473	0.00397215	6	ITGA3
1.21281e-06	-1.42867	0.102	0.452	0.00625082	6	XPNPEP1
8.75287e-08	-1.45484	0.051	0.434	0.000451123	6	PTPRA
1.85458e-06	-1.46676	0.119	0.453	0.00955853	6	STT3A
1.54843e-06	-1.47024	0.085	0.432	0.00798059	6	AFDN
7.70059e-07	-1.48607	0.085	0.444	0.00396888	6	NDUFS3
7.61809e-07	-1.49245	0.085	0.444	0.00392637	6	PCMT1
1.88071e-07	-1.49372	0.085	0.468	0.000969317	6	POMP
1.28141e-06	-1.50018	0.068	0.407	0.00660436	6	KBTBD2
9.29933e-07	-1.51017	0.102	0.458	0.00479288	6	POLR2I
1.79138e-06	-1.52394	0.102	0.451	0.00923275	6	TIMM50
6.32602e-07	-1.52757	0.085	0.447	0.00326043	6	CD9
1.30797e-06	-1.56326	0.068	0.402	0.00674126	6	XPOT
1.64413e-06	-1.56635	0.068	0.409	0.00847385	6	IAH1
1.30077e-06	-1.56848	0.102	0.45	0.00670419	6	MFSD10
1.19189e-06	-1.58572	0.169	0.502	0.00614298	6	DCXR
1.70604e-06	-1.5982	0.085	0.427	0.00879291	6	SNRPA
5.04418e-07	-1.60155	0.119	0.476	0.00259977	6	CDH3
2.30877e-07	-1.60191	0.085	0.463	0.00118994	6	VAMP3
8.09896e-07	-1.60744	0.136	0.481	0.00417421	6	ITGB1BP1
8.74461e-07	-1.62961	0.085	0.438	0.00450697	6	CBX4
6.8636e-07	-1.63583	0.102	0.459	0.0035375	6	MLEC
9.30442e-07	-1.64305	0.102	0.453	0.0047955	6	NUP62
2.00504e-07	-1.64326	0.085	0.457	0.0010334	6	SLC35C2
3.46481e-07	-1.658	0.085	0.453	0.00178576	6	ATP11A
1.67603e-06	-1.66053	0.169	0.493	0.00863824	6	BOP1
7.34142e-07	-1.66742	0.068	0.417	0.00378377	6	DLGAP4
3.53134e-07	-1.66826	0.068	0.43	0.00182005	6	PITPNB
2.68528e-07	-1.66957	0.085	0.45	0.00138399	6	KLHL24
1.14648e-06	-1.70147	0.068	0.415	0.00590895	6	GATD1
5.84032e-07	-1.70287	0.068	0.418	0.0030101	6	NPLOC4
1.68186e-06	-1.70287	0.085	0.418	0.00866833	6	SPIRE1
2.0929e-07	-1.70718	0.085	0.456	0.00107868	6	NUFIP2
1.6258e-06	-1.71306	0.068	0.401	0.0083794	6	ANXA4
3.63282e-07	-1.71542	0.068	0.429	0.00187236	6	SEMA3C
7.65757e-07	-1.71739	0.085	0.439	0.00394671	6	PLP2
6.15077e-07	-1.71905	0.119	0.468	0.0031701	6	LY6E
1.25648e-06	-1.72481	0.186	0.503	0.00647588	6	TMEM101
2.77015e-07	-1.73256	0.085	0.451	0.00142774	6	SELENOK
6.13617e-08	-1.74134	0.068	0.458	0.000316258	6	SLC4A2
9.23213e-07	-1.74384	0.051	0.383	0.00475824	6	PTRH2
1.13363e-06	-1.77259	0.102	0.44	0.00584272	6	ADD3
2.04818e-07	-1.77792	0.068	0.438	0.00105563	6	RRP1
8.37622e-07	-1.78469	0.068	0.412	0.0043171	6	SMIM26
8.02325e-07	-1.78759	0.068	0.412	0.00413518	6	SAR1A
3.88451e-07	-1.80035	0.085	0.443	0.00200208	6	SEC61A1
1.3713e-07	-1.80297	0.068	0.442	0.000706766	6	SSR3
1.69016e-06	-1.81636	0.085	0.421	0.00871106	6	DCAF8
3.27548e-07	-1.81802	0.102	0.467	0.00168818	6	SUMF2
5.0629e-08	-1.84926	0.068	0.454	0.000260942	6	POLE3
2.4805e-07	-1.85431	0.085	0.455	0.00127845	6	PLEKHF2
4.1302e-07	-1.88179	0.085	0.439	0.00212871	6	PAM16
1.29451e-06	-1.88349	0.051	0.377	0.00667192	6	OTUD7B
2.84322e-07	-1.89084	0.051	0.41	0.0014654	6	NDUFS2
3.80368e-07	-1.89534	0.034	0.377	0.00196042	6	SURF1
1.11436e-06	-1.90281	0.068	0.404	0.0057434	6	MTURN
6.4127e-07	-1.9043	0.068	0.414	0.0033051	6	HIST1H2BL
1.21792e-06	-1.90876	0.085	0.414	0.00627718	6	ADSL
1.5751e-07	-1.9124	0.102	0.465	0.000811808	6	GGH
4.27566e-07	-1.91911	0.068	0.412	0.00220368	6	CD320
4.48619e-07	-1.93304	0.186	0.503	0.00231218	6	MACROD1
4.82572e-07	-1.93814	0.068	0.412	0.00248718	6	MYBL2
5.64783e-08	-1.94438	0.068	0.456	0.000291089	6	NDUFA8
5.29013e-07	-1.95117	0.068	0.417	0.00272654	6	TSTA3
6.18546e-07	-1.97245	0.051	0.389	0.00318798	6	NDUFAF2
8.27809e-07	-1.98395	0.085	0.425	0.00426653	6	DNMT1
8.97426e-07	-1.99622	0.068	0.4	0.00462533	6	RAB3C
2.76049e-07	-2.00619	0.136	0.48	0.00142276	6	PRDX5
9.91114e-08	-2.01637	0.136	0.491	0.00051082	6	DTYMK
3.46998e-07	-2.02012	0.068	0.423	0.00178843	6	TRIB3
1.18175e-07	-2.02697	0.068	0.424	0.000609072	6	ANKRD30B
5.70846e-08	-2.02916	0.068	0.46	0.000294214	6	COX7B
4.70666e-07	-2.03652	0.051	0.4	0.00242581	6	HEATR1
5.51393e-08	-2.03787	0.051	0.429	0.000284188	6	GBA
2.03785e-08	-2.0499	0.068	0.47	0.000105031	6	CREM
2.05973e-08	-2.0499	0.068	0.47	0.000106159	6	CYGB
3.75528e-09	-2.05595	0.051	0.478	1.93547e-05	6	HACD3
3.07917e-08	-2.05956	0.068	0.464	0.0001587	6	SDHB
1.70893e-06	-2.06762	0.051	0.369	0.00880783	6	SH3PXD2A
1.04387e-07	-2.07008	0.068	0.437	0.000538009	6	STAU2
1.39537e-06	-2.07274	0.051	0.373	0.00719175	6	RBM15B
2.21388e-07	-2.08461	0.085	0.44	0.00114103	6	RAB13
5.95301e-07	-2.09973	0.051	0.387	0.00306818	6	VPS25
1.70586e-08	-2.10029	0.051	0.447	8.79201e-05	6	TK1
6.23372e-08	-2.10807	0.068	0.45	0.000321286	6	ILVBL
3.06949e-08	-2.11452	0.051	0.446	0.000158201	6	POLDIP2
6.68033e-07	-2.12788	0.051	0.385	0.00344304	6	STARD3NL
1.12524e-07	-2.13115	0.085	0.456	0.000579951	6	PCGF2
1.7145e-06	-2.13687	0.034	0.348	0.00883654	6	PSMG2
1.3933e-06	-2.13877	0.034	0.352	0.00718104	6	DPM1
2.26067e-07	-2.13971	0.051	0.411	0.00116515	6	EBNA1BP2
1.37619e-07	-2.1665	0.068	0.43	0.00070929	6	CWC15
1.77693e-08	-2.19218	0.068	0.469	9.15831e-05	6	FNDC3A
6.6665e-08	-2.19963	0.051	0.431	0.000343592	6	TGFBR1
1.03866e-06	-2.20372	0.034	0.357	0.00535326	6	LONP1
6.58786e-07	-2.2107	0.051	0.385	0.00339538	6	ZNF697
9.42604e-07	-2.21277	0.034	0.359	0.00485818	6	TWF1
1.75929e-06	-2.23425	0.051	0.361	0.00906739	6	STK32A
7.32296e-08	-2.24927	0.068	0.445	0.000377425	6	STX6
3.58212e-08	-2.27281	0.051	0.441	0.000184623	6	GOLGA4
5.60989e-07	-2.27281	0.034	0.368	0.00289134	6	TDRD7
1.52752e-06	-2.28144	0.051	0.364	0.00787284	6	DNAJC5
1.33219e-07	-2.28756	0.051	0.411	0.000686612	6	TIMM10
8.05154e-07	-2.30023	0.051	0.374	0.00414976	6	CDK1
4.47201e-07	-2.31038	0.034	0.372	0.00230487	6	CPEB2
3.74587e-08	-2.31374	0.051	0.431	0.000193062	6	DCTN2
7.48665e-09	-2.32505	0.051	0.458	3.85862e-05	6	CLPTM1
8.60353e-08	-2.33804	0.051	0.418	0.000443426	6	BAMBI
3.63595e-07	-2.34863	0.051	0.393	0.00187397	6	WBP11
8.60301e-08	-2.35774	0.068	0.434	0.000443399	6	CUEDC2
2.67511e-07	-2.36981	0.034	0.38	0.00137875	6	EMD
1.23033e-06	-2.38845	0.034	0.352	0.00634113	6	MMADHC
1.61057e-08	-2.39091	0.034	0.428	8.30087e-05	6	GPR161
1.47205e-07	-2.4144	0.034	0.39	0.000758692	6	UPP1
1.16494e-06	-2.45948	0.034	0.353	0.00600408	6	SEPTIN11
1.47207e-06	-2.47038	0.034	0.344	0.00758703	6	FBXO32
1.55361e-07	-2.47128	0.051	0.407	0.000800733	6	SEC63
7.66565e-07	-2.4794	0.034	0.355	0.00395088	6	LRRC45
1.14049e-07	-2.48329	0.051	0.411	0.00058781	6	CHD4
1.76215e-07	-2.49728	0.017	0.358	0.000908214	6	LSM5
6.22564e-08	-2.49965	0.034	0.404	0.000320869	6	PSMD1
8.11588e-09	-2.50386	0.034	0.439	4.18292e-05	6	COPB2
6.32379e-07	-2.53065	0.034	0.364	0.00325928	6	MCM6
5.84858e-08	-2.53902	0.051	0.416	0.000301436	6	FN3K
1.97314e-07	-2.60013	0.034	0.377	0.00101695	6	CEP131
3.11438e-07	-2.60343	0.034	0.375	0.00160515	6	PIR
1.47976e-06	-2.6092	0.017	0.321	0.0076267	6	PPP6C
1.90354e-07	-2.61821	0.034	0.384	0.000981086	6	CTTN
7.2407e-08	-2.62798	0.034	0.393	0.000373186	6	LSS
3.03807e-07	-2.63284	0.051	0.388	0.00156582	6	BTBD3
1.24168e-07	-2.64893	0.034	0.385	0.000639963	6	NDUFAB1
1.09217e-06	-2.69497	0.034	0.346	0.00562906	6	ATP10A
1.29664e-06	-2.6969	0.034	0.344	0.00668289	6	AP5B1
5.75404e-08	-2.70385	0.034	0.397	0.000296563	6	TMEM189
9.18729e-08	-2.70385	0.034	0.395	0.000473513	6	SHMT2
1.35327e-07	-2.70539	0.034	0.389	0.000697476	6	NAMPT
1.34431e-06	-2.71993	0.034	0.343	0.00692857	6	CYTH2
1.34277e-07	-2.72373	0.034	0.389	0.000692065	6	ECM1
6.44358e-08	-2.72828	0.034	0.395	0.000332102	6	FAM50A
6.67356e-07	-2.77409	0.034	0.355	0.00343955	6	MEA1
2.45643e-07	-2.77592	0.017	0.352	0.00126605	6	ATP6V1H
2.36088e-07	-2.78141	0.017	0.353	0.0012168	6	EMC10
4.45851e-08	-2.80205	0.051	0.417	0.000229792	6	MICAL1
7.90987e-07	-2.82806	0.034	0.352	0.00407675	6	KCNQ5
2.82418e-07	-2.84562	0.034	0.369	0.00145558	6	WDR45B
8.68758e-09	-2.8557	0.034	0.431	4.47758e-05	6	PYCARD
2.49613e-07	-2.90876	0.051	0.383	0.00128651	6	CUL4A
8.72929e-08	-2.9915	0.034	0.388	0.000449907	6	CANT1
9.12963e-07	-3.00354	0.017	0.328	0.00470541	6	NDUFA9
1.08788e-06	-3.04667	0.017	0.325	0.00560691	6	SPC24
1.3512e-08	-3.06377	0.017	0.4	6.96408e-05	6	ZWINT
1.06088e-06	-3.06676	0.017	0.325	0.00546777	6	DEF8
1.52681e-08	-3.06826	0.017	0.398	7.86919e-05	6	IPO5
1.64159e-08	-3.07124	0.034	0.413	8.46077e-05	6	AKAP1
1.03228e-06	-3.0767	0.017	0.326	0.00532037	6	ZNF593
6.16908e-09	-3.13401	0.017	0.412	3.17954e-05	6	LDLRAD3
3.19779e-09	-3.18316	0.017	0.421	1.64814e-05	6	AC015802.6
4.25009e-10	-3.36454	0.034	0.465	2.1905e-06	6	MEX3C
2.26019e-08	-3.45155	0.034	0.4	0.00011649	6	MDH1
3.38244e-09	-3.52019	0.017	0.417	1.74331e-05	6	ENY2
1.84e-06	-3.53758	0.017	0.308	0.00948338	6	RNASEH1
1.17913e-06	-3.56961	0.017	0.316	0.00607726	6	ARNT2
1.67637e-09	-3.57313	0.017	0.427	8.64e-06	6	SCAND1
1.43436e-09	-3.59266	0.017	0.43	7.3927e-06	6	TUBB2A
3.71526e-07	-3.65172	0.017	0.335	0.00191484	6	LYPLAL1
6.21598e-08	-3.80313	0.017	0.364	0.000320371	6	DCTN6
6.78272e-08	-3.81208	0.017	0.363	0.000349581	6	DTD1
3.98003e-09	-4.07274	0.017	0.406	2.05131e-05	6	GOSR1
1.43332e-06	-4.44849	0	0.289	0.00738732	6	COPS5
8.70906e-07	-4.49595	0	0.298	0.00448865	6	ACAT2
4.72495e-07	-4.53973	0	0.309	0.00243524	6	NXT1
3.64977e-07	-4.57172	0	0.313	0.00188109	6	ZDHHC5
1.05844e-07	-4.69109	0	0.334	0.00054552	6	BAX
5.67582e-08	-4.73319	0	0.344	0.000292532	6	GOLGA7B
2.59421e-09	-5.0025	0	0.392	1.33706e-05	6	SNX8
5.3233e-13	3.56212	0.089	0.012	2.74363e-09	7	IGLV3-1
3.19071e-38	2.54285	0.531	0.153	1.64449e-34	7	IGHA1
9.28532e-51	2.46858	0.552	0.128	4.78566e-47	7	JCHAIN
2.0264e-81	2.40658	0.958	0.448	1.0444e-77	7	IGHG1
6.11519e-86	2.23615	1	0.786	3.15177e-82	7	IGKC
1.74699e-42	2.21446	0.667	0.237	9.004e-39	7	IGLC1
1.42705e-06	2.11917	0.073	0.017	0.00735502	7	ADAM19
2.44638e-57	2.06974	0.802	0.291	1.26086e-53	7	IGHM
1.12252e-09	2.06259	0.099	0.02	5.78547e-06	7	TRAJ16
3.48964e-49	2.04927	0.521	0.116	1.79856e-45	7	IGHG2
9.95619e-23	2.03384	0.333	0.094	5.13142e-19	7	IGHG4
5.03309e-17	1.99458	0.25	0.068	2.59405e-13	7	CXCL12
1.22902e-19	1.67691	0.297	0.083	6.33436e-16	7	IGHG3
6.2713e-11	1.67557	0.224	0.079	3.23223e-07	7	HLA-DQA1
7.03901e-27	1.64242	0.458	0.148	3.6279e-23	7	CCL19
2.92411e-10	1.50866	0.208	0.072	1.50709e-06	7	IGKV4-1
3.15793e-12	1.4411	0.25	0.086	1.6276e-08	7	MPEG1
5.66671e-26	1.41979	0.391	0.109	2.92062e-22	7	CCL21
4.11564e-14	1.35768	0.339	0.13	2.1212e-10	7	HLA-DRB5
4.17906e-27	1.33935	0.719	0.373	2.15389e-23	7	CD74
2.15709e-13	1.31457	0.453	0.223	1.11176e-09	7	LYZ
4.23642e-07	1.30846	0.193	0.081	0.00218345	7	SERPINF1
1.16319e-06	1.29246	0.161	0.063	0.00599507	7	CD52
1.07182e-09	1.2891	0.219	0.08	5.52418e-06	7	IL32
6.66196e-08	1.2729	0.234	0.104	0.000343357	7	C7
4.44046e-15	1.2589	0.375	0.15	2.28861e-11	7	PTGDS
7.1059e-22	1.24672	0.354	0.102	3.66238e-18	7	LTB
1.71273e-19	1.23683	0.583	0.283	8.82742e-16	7	HLA-DRB1
1.64881e-14	1.23149	0.344	0.129	8.49798e-11	7	ARHGDIB
1.18935e-08	1.1861	0.198	0.073	6.12989e-05	7	TRBC2
4.74766e-11	1.16808	0.172	0.048	2.44694e-07	7	TRBC1
1.52045e-07	1.11814	0.323	0.173	0.00078364	7	HLA-DPB1
3.93527e-10	1.09645	0.255	0.098	2.02824e-06	7	CD37
5.18743e-08	1.07359	0.365	0.198	0.00026736	7	C1QB
1.2085e-06	1.06788	0.151	0.056	0.0062286	7	LBH
7.94694e-08	1.05743	0.344	0.181	0.000409585	7	HLA-DPA1
2.42882e-13	1.05504	0.526	0.282	1.25182e-09	7	HLA-DRA
1.1488e-09	0.974634	0.245	0.095	5.92091e-06	7	CORO1A
2.04267e-12	0.939598	0.557	0.32	1.05279e-08	7	COL3A1
3.75821e-08	0.936425	0.318	0.155	0.000193698	7	LSP1
2.64984e-07	0.921266	0.286	0.141	0.00136573	7	CLU
9.01089e-39	0.848212	0.99	0.855	4.64421e-35	7	TMSB4X
3.61578e-11	0.836146	0.594	0.374	1.86357e-07	7	COL1A2
5.94076e-09	0.721516	0.557	0.343	3.06187e-05	7	COL1A1
3.69999e-11	0.416279	0.984	0.952	1.90697e-07	7	B2M
4.25793e-12	-0.231161	1	1	2.19454e-08	7	S100A6
3.79285e-07	-0.421334	0.87	0.937	0.00195484	7	ADGRG1
9.90938e-08	-0.456615	0.833	0.916	0.00051073	7	ATOX1
9.19414e-08	-0.723787	0.505	0.701	0.000473866	7	HSPA1B
8.7633e-25	-1.6201	0.609	0.836	4.51661e-21	7	VGF
1.04185e-06	1.30513	0.154	0.062	0.0053697	8	CDR2L
6.89876e-10	1.2639	0.253	0.106	3.55562e-06	8	SHROOM2
2.33607e-22	1.25585	0.538	0.224	1.20401e-18	8	CCDC57
1.1612e-06	1.12709	0.204	0.094	0.00598484	8	CLCN6
1.75997e-07	1.11638	0.222	0.101	0.000907086	8	MTRES1
5.43047e-08	1.11454	0.281	0.14	0.000279887	8	ANKRD36
2.68921e-08	1.07123	0.281	0.136	0.000138602	8	ZNF707
2.2919e-08	1.06092	0.303	0.152	0.000118124	8	SAPCD2
4.65212e-20	1.04066	0.701	0.401	2.3977e-16	8	CREBZF
2.15897e-18	1.02935	0.62	0.324	1.11273e-14	8	POLG2
2.80858e-11	1.02353	0.403	0.203	1.44754e-07	8	GOLPH3L
3.6522e-08	1.00513	0.29	0.142	0.000188234	8	AMMECR1L
3.51601e-08	1.00257	0.321	0.168	0.000181215	8	EZH1
7.19757e-11	1.00159	0.407	0.21	3.70963e-07	8	ABCA2
6.68385e-08	0.956061	0.308	0.159	0.000344485	8	INTS2
1.93026e-06	0.954382	0.285	0.158	0.00994854	8	LPIN3
4.96496e-08	0.950033	0.317	0.164	0.000255894	8	DHX8
1.48866e-07	0.950033	0.312	0.165	0.000767254	8	GPC2
1.71248e-09	0.946261	0.339	0.167	8.82614e-06	8	CAD
4.01456e-08	0.937081	0.348	0.189	0.00020691	8	FANCI
8.72459e-10	0.936983	0.353	0.173	4.49665e-06	8	CEP164
6.52661e-09	0.934048	0.335	0.168	3.36382e-05	8	SMC4
1.07285e-08	0.933228	0.344	0.179	5.52946e-05	8	POLK
3.79132e-08	0.933228	0.339	0.179	0.000195405	8	MTHFD1L
5.04152e-07	0.927625	0.262	0.132	0.0025984	8	CSAD
5.18974e-08	0.918376	0.312	0.16	0.000267479	8	PRDM5
2.1959e-07	0.916567	0.362	0.211	0.00113177	8	RGMB
2.0036e-10	0.914765	0.376	0.184	1.03265e-06	8	DLGAP1
4.97873e-08	0.912086	0.407	0.244	0.000256604	8	KIF23
2.01548e-07	0.911969	0.312	0.166	0.00103878	8	KNTC1
1.27577e-10	0.910984	0.389	0.192	6.57534e-07	8	ABCC5
1.12144e-06	0.90731	0.326	0.188	0.00577988	8	NLE1
8.07795e-07	0.906303	0.267	0.137	0.00416338	8	POLM
1.33246e-08	0.898	0.344	0.178	6.8675e-05	8	AURKB
3.91865e-08	0.891698	0.321	0.165	0.000201967	8	SETDB1
2.15491e-07	0.887981	0.308	0.162	0.00111064	8	BBS5
5.00759e-12	0.886633	0.511	0.281	2.58091e-08	8	IFRD2
4.91402e-11	0.885917	0.448	0.234	2.53269e-07	8	CHERP
2.79791e-08	0.885388	0.371	0.203	0.000144204	8	NCAPG2
6.31308e-10	0.883583	0.493	0.287	3.25376e-06	8	USP54
1.18635e-09	0.880132	0.452	0.262	6.11442e-06	8	APTX
7.7801e-09	0.878583	0.38	0.205	4.00986e-05	8	ZNF586
5.99815e-07	0.868877	0.262	0.131	0.00309144	8	COG2
1.8397e-12	0.868724	0.557	0.307	9.48184e-09	8	NT5DC3
8.6175e-11	0.864507	0.475	0.261	4.44146e-07	8	ACAT2
3.07007e-08	0.863654	0.33	0.167	0.000158231	8	SLC33A1
1.3677e-06	0.862758	0.285	0.153	0.0070491	8	AKAP8
1.04835e-06	0.86221	0.276	0.145	0.00540321	8	RECQL5
7.98207e-07	0.861824	0.29	0.154	0.00411396	8	CIP2A
7.43046e-08	0.859846	0.317	0.163	0.000382966	8	GNE
9.4807e-10	0.859804	0.412	0.217	4.88635e-06	8	STK35
1.62301e-07	0.858776	0.357	0.202	0.000836501	8	CD46
3.03989e-09	0.858142	0.385	0.201	1.56676e-05	8	RTEL1
5.42316e-11	0.85601	0.529	0.31	2.7951e-07	8	ENTPD6
3.63839e-09	0.852966	0.412	0.227	1.87523e-05	8	MTHFD1
3.13849e-08	0.849701	0.367	0.2	0.000161758	8	BTAF1
1.4512e-11	0.846979	0.548	0.319	7.47947e-08	8	BAHCC1
5.67859e-08	0.839791	0.394	0.229	0.000292675	8	BRIP1
6.77362e-09	0.837148	0.398	0.218	3.49112e-05	8	ARFRP1
6.96423e-07	0.833115	0.317	0.174	0.00358936	8	TONSL
1.03115e-07	0.826282	0.462	0.286	0.000531457	8	EZH2
4.47204e-07	0.823232	0.348	0.197	0.00230489	8	NOTUM
1.46793e-12	0.822593	0.566	0.317	7.56571e-09	8	ZC3H18
2.47453e-07	0.819733	0.317	0.168	0.00127537	8	TEFM
2.37063e-10	0.819238	0.548	0.336	1.22182e-06	8	RBM15B
3.00923e-09	0.818488	0.452	0.26	1.55096e-05	8	PCED1A
1.55301e-11	0.816424	0.548	0.313	8.0042e-08	8	GPSM1
1.38421e-10	0.815884	0.502	0.283	7.13422e-07	8	PAXBP1
8.17647e-08	0.811888	0.357	0.194	0.000421415	8	ZNF623
1.61467e-13	0.809613	0.624	0.35	8.32199e-10	8	LIG1
1.35572e-06	0.809216	0.317	0.177	0.00698736	8	DMTF1
5.63783e-09	0.804632	0.52	0.334	2.90574e-05	8	ZCCHC3
2.99764e-10	0.79381	0.52	0.304	1.54498e-06	8	MCM3AP
1.46764e-08	0.790071	0.425	0.242	7.56422e-05	8	CCDC93
1.44821e-12	0.789861	0.67	0.417	7.4641e-09	8	SCRIB
1.16837e-07	0.789636	0.407	0.238	0.000602177	8	POLR1A
6.44669e-07	0.789201	0.38	0.227	0.00332262	8	SLC27A1
9.13396e-09	0.786722	0.489	0.302	4.70764e-05	8	TRAF5
2.27136e-07	0.786405	0.394	0.233	0.00117066	8	MMP17
9.6495e-08	0.786228	0.398	0.231	0.000497335	8	AARS
1.78434e-07	0.775059	0.38	0.217	0.00091965	8	GOLGA1
6.13293e-07	0.773981	0.357	0.206	0.00316091	8	ZNF7
7.6073e-10	0.770735	0.557	0.345	3.9208e-06	8	MAVS
8.50525e-08	0.769403	0.398	0.225	0.000438361	8	EFHD1
5.82423e-07	0.768899	0.385	0.231	0.00300181	8	ACOT9
3.67554e-11	0.768788	0.593	0.359	1.89437e-07	8	SNX30
4.60024e-08	0.767776	0.443	0.264	0.000237097	8	PDE3A
2.1338e-09	0.766373	0.502	0.298	1.09976e-05	8	DDR1
3.43601e-09	0.765196	0.498	0.3	1.77092e-05	8	CPSF4
9.95088e-07	0.759779	0.357	0.21	0.00512869	8	UBE2O
3.81763e-08	0.758468	0.412	0.235	0.00019676	8	KIAA1211
8.58252e-07	0.75478	0.33	0.182	0.00442343	8	ANKRD39
1.3825e-06	0.753892	0.371	0.221	0.00712542	8	FAM120B
5.83008e-08	0.749427	0.412	0.237	0.000300482	8	TTC31
2.20598e-07	0.747083	0.376	0.212	0.00113696	8	P2RX7
5.14375e-07	0.746565	0.357	0.202	0.00265109	8	AP3M2
3.55632e-07	0.743209	0.344	0.19	0.00183293	8	AGAP1
1.2221e-06	0.743009	0.321	0.178	0.00629868	8	JRK
8.54629e-09	0.743009	0.457	0.261	4.40476e-05	8	ADCY1
5.93398e-07	0.739852	0.344	0.191	0.00305837	8	NISCH
2.83794e-09	0.73328	0.507	0.302	1.46267e-05	8	NCOR2
4.69221e-07	0.73199	0.466	0.304	0.00241837	8	WASHC4
5.58066e-08	0.729523	0.452	0.274	0.000287627	8	OXLD1
1.73868e-07	0.728509	0.389	0.221	0.000896114	8	MECR
1.89382e-08	0.725101	0.425	0.238	9.76076e-05	8	PKD2
4.03193e-10	0.721205	0.611	0.383	2.07805e-06	8	PHRF1
2.4313e-08	0.718796	0.529	0.342	0.000125309	8	CEP131
5.95034e-07	0.718761	0.412	0.251	0.00306681	8	GTPBP10
1.53514e-07	0.718118	0.421	0.25	0.000791213	8	NOM1
1.45436e-10	0.717428	0.566	0.337	7.49579e-07	8	NDUFS1
8.50063e-09	0.717169	0.457	0.262	4.38122e-05	8	OBSL1
8.37042e-09	0.715747	0.484	0.291	4.31411e-05	8	RALGAPB
6.85451e-09	0.715022	0.502	0.304	3.53282e-05	8	CHMP6
1.61518e-08	0.714881	0.529	0.323	8.32466e-05	8	NAB2
2.37338e-08	0.714646	0.484	0.296	0.000122324	8	DGCR8
5.4848e-07	0.712704	0.443	0.279	0.00282687	8	SPATS2
1.32295e-07	0.712056	0.394	0.223	0.000681846	8	RCBTB1
6.83099e-07	0.711692	0.412	0.251	0.00352069	8	KIFC3
2.07643e-07	0.708658	0.516	0.348	0.00107019	8	NUBP2
9.53894e-09	0.708029	0.493	0.293	4.91637e-05	8	APEH
1.07814e-06	0.704972	0.403	0.249	0.00555675	8	THOP1
2.49748e-07	0.700963	0.439	0.265	0.0012872	8	ABCC2
2.11704e-12	0.700225	0.742	0.524	1.09112e-08	8	PABPC1L
2.95181e-07	0.695143	0.385	0.22	0.00152136	8	TM9SF4
6.34821e-07	0.69289	0.362	0.206	0.00327187	8	CDK6
8.99705e-07	0.692498	0.362	0.208	0.00463708	8	TJAP1
5.04235e-07	0.690767	0.389	0.227	0.00259882	8	NCOA5
3.26499e-07	0.690684	0.43	0.263	0.00168278	8	CARD19
4.42903e-07	0.687242	0.439	0.27	0.00228272	8	SPRY4
7.26434e-08	0.685902	0.498	0.316	0.000374404	8	AEN
2.39744e-09	0.684094	0.557	0.338	1.23564e-05	8	OTUD7B
1.88353e-06	0.679606	0.398	0.244	0.0097077	8	COG1
1.02026e-07	0.678551	0.412	0.236	0.000525843	8	ANKRD13D
1.99275e-16	0.677654	0.9	0.798	1.02706e-12	8	VGF
1.51879e-06	0.676175	0.439	0.277	0.00782784	8	DNAJC2
1.53409e-09	0.67616	0.566	0.35	7.90668e-06	8	HUS1
1.37169e-06	0.675105	0.421	0.263	0.00706968	8	PTP4A3
1.23501e-07	0.671792	0.452	0.27	0.000636524	8	INTS3
1.62541e-06	0.671162	0.389	0.235	0.00837736	8	FMR1
4.79923e-07	0.667152	0.462	0.289	0.00247352	8	KCTD15
3.38063e-07	0.666837	0.466	0.294	0.00174238	8	MVD
2.40304e-07	0.666508	0.457	0.28	0.00123853	8	CEP128
1.06989e-07	0.66566	0.48	0.293	0.000551422	8	PHLDA3
2.88972e-08	0.663339	0.507	0.311	0.000148936	8	PPAN
1.58203e-12	0.661694	0.724	0.461	8.15381e-09	8	TNKS
1.37379e-06	0.661242	0.43	0.262	0.00708051	8	RAB17
1.20477e-07	0.660533	0.475	0.294	0.000620936	8	SRC
2.49228e-07	0.658617	0.548	0.363	0.00128452	8	PRPF4B
3.2662e-11	0.657414	0.67	0.42	1.6834e-07	8	ZGPAT
9.11819e-11	0.655973	0.674	0.427	4.69952e-07	8	SRRT
6.44387e-09	0.652818	0.543	0.328	3.32117e-05	8	OSER1
2.19347e-07	0.652427	0.493	0.315	0.00113052	8	CTNNAL1
1.54384e-08	0.65224	0.62	0.435	7.95695e-05	8	CENPB
3.74732e-07	0.651349	0.466	0.292	0.00193137	8	NXF1
2.81792e-07	0.651286	0.43	0.255	0.00145236	8	BNC2
3.51716e-07	0.651286	0.443	0.267	0.00181274	8	PPFIA1
4.6719e-09	0.650201	0.615	0.398	2.4079e-05	8	RRP1
5.27402e-07	0.649279	0.507	0.333	0.00271823	8	VTI1A
4.13427e-07	0.648022	0.416	0.247	0.0021308	8	ARIH1
8.2437e-07	0.64789	0.466	0.3	0.0042488	8	LAS1L
1.89703e-07	0.647633	0.425	0.251	0.000977731	8	TAP2
1.27054e-09	0.647331	0.606	0.383	6.54838e-06	8	RUVBL1
8.01402e-11	0.647172	0.774	0.59	4.13043e-07	8	CEP170
1.17604e-10	0.643937	0.643	0.398	6.0613e-07	8	HCFC1
6.81859e-07	0.639181	0.443	0.278	0.0035143	8	LRRC47
5.38694e-10	0.6387	0.62	0.388	2.77643e-06	8	ANKHD1
6.09585e-07	0.638292	0.529	0.359	0.0031418	8	PILRB
1.73747e-07	0.6376	0.462	0.282	0.000895493	8	TRIM56
1.15693e-08	0.637574	0.597	0.391	5.96281e-05	8	DDX46
3.4332e-10	0.634498	0.661	0.414	1.76947e-06	8	SLC4A2
6.30453e-10	0.634119	0.724	0.521	3.24936e-06	8	SLC23A2
1.86323e-06	0.632145	0.421	0.26	0.0096031	8	C1orf35
1.15827e-08	0.630918	0.688	0.502	5.96974e-05	8	SHTN1
4.30842e-08	0.62901	0.552	0.349	0.000222056	8	ZNF697
1.06348e-06	0.628487	0.471	0.305	0.00548119	8	HRAS
1.00684e-08	0.628413	0.624	0.423	5.18926e-05	8	GCN1
4.18165e-10	0.626963	0.629	0.396	2.15522e-06	8	COPB2
3.56733e-07	0.62357	0.452	0.276	0.0018386	8	USP47
3.70516e-08	0.622402	0.615	0.417	0.000190964	8	ANKLE2
3.09014e-07	0.621749	0.502	0.319	0.00159266	8	EIF2B5
7.75447e-07	0.620343	0.529	0.362	0.00399665	8	C12orf76
9.62603e-07	0.616299	0.43	0.26	0.00496125	8	RAF1
1.06321e-06	0.6147	0.443	0.279	0.00547976	8	FBXL5
2.97826e-08	0.614307	0.584	0.381	0.000153499	8	NPLOC4
1.08064e-09	0.612998	0.701	0.485	5.56963e-06	8	UAP1L1
3.20428e-07	0.612983	0.538	0.35	0.00165148	8	THRAP3
1.44388e-06	0.612899	0.557	0.392	0.00744178	8	ANKRD30B
2.29863e-07	0.612172	0.557	0.377	0.00118471	8	AP1S1
6.7782e-10	0.611074	0.679	0.454	3.49349e-06	8	BOP1
1.42025e-08	0.609061	0.588	0.375	7.31997e-05	8	HELLS
2.52144e-08	0.605342	0.525	0.318	0.000129955	8	LRRC45
4.39618e-08	0.60504	0.557	0.353	0.000226579	8	ZNF783
5.3189e-09	0.604896	0.67	0.482	2.74136e-05	8	HORMAD1
3.34404e-07	0.604742	0.561	0.384	0.00172352	8	OSBPL1A
5.95251e-08	0.602439	0.561	0.358	0.000306792	8	RSRP1
1.15319e-07	0.601742	0.489	0.298	0.000594355	8	CFAP298
3.65824e-08	0.60057	0.538	0.338	0.000188546	8	IBTK
9.12203e-09	0.596351	0.643	0.414	4.7015e-05	8	BPTF
4.40906e-08	0.594192	0.602	0.405	0.000227243	8	LENG8
4.6223e-08	0.592678	0.624	0.421	0.000238233	8	NMRAL1
3.75094e-08	0.592643	0.57	0.361	0.000193324	8	POLDIP3
2.27943e-07	0.592248	0.543	0.36	0.00117482	8	ZNF749
8.44152e-07	0.591006	0.516	0.344	0.00435076	8	PLEKHO2
4.22615e-08	0.590907	0.575	0.375	0.000217816	8	TNKS2
1.12133e-06	0.590504	0.552	0.379	0.00577934	8	AKAP1
5.61014e-07	0.588112	0.434	0.257	0.00289147	8	GTF3C3
1.69289e-06	0.584145	0.484	0.32	0.00872513	8	CCDC86
1.21487e-08	0.583885	0.652	0.431	6.26143e-05	8	DIDO1
1.24384e-06	0.583366	0.647	0.479	0.00641075	8	FARP2
7.10393e-08	0.582816	0.584	0.381	0.000366136	8	INTS1
1.35178e-06	0.581772	0.534	0.362	0.00696708	8	SHMT2
1.52857e-10	0.578551	0.891	0.872	7.87823e-07	8	FASN
2.63864e-07	0.578367	0.561	0.375	0.00135995	8	FDPS
1.33383e-06	0.577889	0.457	0.285	0.00687458	8	EXOSC7
2.67622e-07	0.576902	0.593	0.403	0.00137933	8	ZNF330
2.28516e-10	0.576027	0.76	0.574	1.17777e-06	8	RNF213
5.43829e-07	0.575017	0.534	0.35	0.00280289	8	CRLS1
2.54123e-08	0.572577	0.593	0.375	0.000130975	8	SOGA1
2.38155e-09	0.571019	0.674	0.458	1.22745e-05	8	IL16
4.31485e-07	0.569888	0.48	0.302	0.00222387	8	USP34
3.83331e-07	0.569612	0.561	0.368	0.00197569	8	IL1RAP
2.68865e-07	0.565266	0.57	0.371	0.00138573	8	MSL1
1.8142e-07	0.564495	0.584	0.372	0.000935037	8	LDLRAD3
4.88536e-08	0.561655	0.593	0.394	0.000251791	8	PLXNB2
1.2728e-07	0.560742	0.552	0.353	0.000655999	8	TRAF2
4.60974e-07	0.559318	0.579	0.392	0.00237586	8	SNRPA
8.65156e-07	0.558584	0.557	0.376	0.00445901	8	SREBF2
1.59208e-12	0.557125	0.896	0.771	8.2056e-09	8	RGS12
3.68071e-07	0.554046	0.538	0.35	0.00189704	8	RARS
1.39024e-07	0.55376	0.561	0.36	0.000716529	8	RBM17
5.45141e-08	0.551498	0.606	0.391	0.000280966	8	GTF3C1
1.40549e-06	0.550927	0.502	0.328	0.00724388	8	ISG20L2
3.61952e-07	0.54996	0.683	0.509	0.0018655	8	ESF1
1.7389e-06	0.54948	0.452	0.281	0.00896228	8	PFKFB2
6.41495e-08	0.547025	0.62	0.412	0.000330626	8	MFSD10
3.52643e-07	0.541879	0.602	0.407	0.00181752	8	BZW2
9.14896e-07	0.539781	0.543	0.368	0.00471537	8	NCAPD3
1.56666e-06	0.539182	0.543	0.369	0.00807454	8	TPD52L2
1.80057e-07	0.536408	0.738	0.599	0.000928014	8	GDI1
1.71467e-07	0.535356	0.629	0.428	0.000883739	8	ARFGAP1
2.87555e-07	0.532278	0.638	0.444	0.00148206	8	CASC3
8.159e-07	0.532175	0.484	0.3	0.00420515	8	NSUN2
2.90103e-08	0.532101	0.688	0.478	0.000149519	8	DCTN1
4.22709e-08	0.531655	0.633	0.418	0.000217864	8	GPATCH4
8.95773e-07	0.530436	0.615	0.424	0.00461681	8	CLTB
9.86687e-07	0.529334	0.575	0.386	0.00508538	8	DCAF8
5.46177e-08	0.525519	0.652	0.425	0.0002815	8	SRP68
2.49231e-08	0.524963	0.661	0.437	0.000128453	8	INTS11
4.49874e-08	0.521458	0.683	0.473	0.000231865	8	CLASRP
2.68656e-07	0.520212	0.579	0.379	0.00138466	8	CPSF1
1.10393e-07	0.513266	0.688	0.496	0.000568966	8	IKBKB
1.61207e-06	0.510149	0.493	0.311	0.00830861	8	FMC1
5.09108e-07	0.506469	0.656	0.455	0.00262394	8	DDX42
3.9867e-07	0.504094	0.629	0.425	0.00205474	8	VDAC3
3.41945e-07	0.502574	0.566	0.364	0.00176238	8	AGO2
1.21638e-07	0.502469	0.688	0.492	0.00062692	8	NOP58
1.69948e-06	0.500136	0.629	0.436	0.00875914	8	DIPK1B
7.46847e-07	0.499834	0.615	0.418	0.00384925	8	GGA3
2.55013e-07	0.495964	0.652	0.451	0.00131434	8	PMPCB
9.96551e-07	0.495051	0.638	0.451	0.00513622	8	SSNA1
2.41469e-07	0.493558	0.647	0.459	0.00124453	8	MTX2
5.07638e-07	0.491344	0.661	0.457	0.00261636	8	DUT
1.27313e-07	0.490017	0.647	0.455	0.000656171	8	MED24
3.91143e-07	0.484079	0.62	0.421	0.00201595	8	SLC2A4RG
1.63119e-06	0.483197	0.656	0.465	0.00840717	8	ARFGEF2
1.92087e-12	0.475533	0.955	0.883	9.90015e-09	8	PYGB
1.37829e-06	0.471498	0.633	0.452	0.00710373	8	PTPN1
1.06046e-07	0.469663	0.783	0.635	0.000546562	8	SH3BP4
7.72353e-07	0.468979	0.661	0.468	0.00398071	8	MACROD1
1.97446e-07	0.46571	0.837	0.714	0.00101763	8	HPS4
4.72677e-07	0.460609	0.552	0.351	0.00243618	8	IER5
6.82467e-13	0.457481	0.964	0.899	3.51744e-09	8	BIRC7
1.14181e-06	0.435518	0.729	0.542	0.00588487	8	PHF20
4.38764e-08	0.427499	0.878	0.79	0.000226139	8	RAB5B
4.72282e-08	0.423336	0.905	0.857	0.000243414	8	TPX2
5.9018e-08	0.40775	0.882	0.807	0.000304179	8	EIF6
7.7984e-08	0.397694	0.864	0.736	0.000401929	8	TBCD
8.98164e-12	0.394561	0.964	0.963	4.62914e-08	8	SDC3
1.09863e-07	0.389882	0.855	0.775	0.000566232	8	FNIP2
2.38037e-20	0.351951	1	0.998	1.22684e-16	8	DDX5
1.38394e-06	0.338053	0.9	0.833	0.00713285	8	SRSF1
3.34691e-08	0.337465	0.977	0.948	0.0001725	8	SNRNP70
2.20116e-12	0.330068	0.995	0.989	1.13448e-08	8	MYO10
7.45036e-07	0.312784	0.973	0.947	0.00383991	8	TBC1D16
4.28685e-10	0.303106	0.977	0.986	2.20944e-06	8	SNCA
4.72487e-10	0.297955	0.995	0.986	2.4352e-06	8	HNRNPA2B1
1.75586e-07	0.288694	1	0.976	0.000904968	8	EIF4H
1.06806e-08	0.278516	1	0.999	5.50478e-05	8	CTNNB1
1.8247e-06	0.265637	0.982	0.965	0.00940449	8	TYR
7.53196e-07	0.261904	0.982	0.978	0.00388197	8	PRRC2C
1.93671e-16	-0.239884	1	1	9.9818e-13	8	UBC
1.83856e-09	-0.301623	0.977	0.999	9.47596e-06	8	EEF1G
1.44432e-09	-0.32822	0.991	0.996	7.444e-06	8	VIM
1.00621e-23	-0.345372	1	1	5.18603e-20	8	UBA52
1.03277e-31	-0.403495	0.995	1	5.32287e-28	8	FTH1
2.23547e-07	-0.423273	0.887	0.965	0.00115216	8	B2M
5.54325e-08	-0.426272	0.864	0.935	0.000285699	8	MXRA7
2.45478e-21	-0.453088	0.995	1	1.26519e-17	8	FTL
7.1907e-10	-0.463415	0.837	0.937	3.70609e-06	8	CCNI
9.3442e-07	-0.497665	0.733	0.8	0.004816	8	MT2A
1.0552e-13	-0.503899	0.91	0.971	5.43852e-10	8	RACK1
1.90236e-21	-1.2057	0.674	0.898	9.80477e-18	8	TMSB4X
1.56236e-09	-1.45722	0.244	0.435	8.05242e-06	8	CD74
2.82392e-09	-1.88677	0.122	0.307	1.45545e-05	8	IGLC1
2.2827e-07	-2.38047	0.068	0.212	0.0011765	8	IGHA1
1.16141e-13	-2.44881	0.136	0.377	5.98592e-10	8	IGHM
2.66196e-19	-2.46425	0.253	0.539	1.37197e-15	8	IGHG1
3.22689e-52	-3.00945	0.448	0.862	1.66314e-48	8	IGKC
2.00481e-09	-3.04238	0.032	0.195	1.03328e-05	8	JCHAIN
8.77481e-11	2.07632	0.242	0.083	4.52254e-07	9	ADM
3.85204e-52	2.01783	0.993	0.794	1.98534e-48	9	VGF
4.1282e-14	1.86776	0.463	0.223	2.12767e-10	9	HMOX1
4.66374e-07	1.72697	0.161	0.056	0.00240369	9	LRP2
3.8363e-15	1.57517	0.55	0.298	1.97723e-11	9	PLIN2
1.23765e-07	1.55816	0.309	0.152	0.000637882	9	RNASE1
1.05889e-19	1.25423	0.893	0.66	5.45754e-16	9	HSPA1B
2.98167e-07	1.07645	0.423	0.251	0.00153675	9	SLC2A3
3.07964e-09	0.986031	0.591	0.417	1.58725e-05	9	PPP1R15A
2.43226e-07	0.87596	0.617	0.484	0.00125359	9	ENO2
1.74051e-08	0.764893	0.785	0.661	8.97059e-05	9	TIMP1
5.10153e-11	0.741169	0.886	0.732	2.62933e-07	9	DNAJB1
4.79344e-08	0.481026	1	0.999	0.000247054	9	FTL
1.82233e-06	0.44014	0.966	0.878	0.00939231	9	IVNS1ABP
1.26169e-06	0.34691	1	0.999	0.00650273	9	HSPB1
3.7075e-07	0.304252	1	0.989	0.00191084	9	ENO1
3.41004e-07	-0.195417	1	1	0.00175754	9	HSPA8
2.94558e-08	-0.206031	1	1	0.000151815	9	CD63
5.15567e-09	-0.207289	1	0.999	2.65723e-05	9	FTH1
6.452e-20	-0.272134	1	1	3.32536e-16	9	PMEL
1.79367e-06	-0.324518	0.973	0.995	0.00924459	9	SCD
3.15109e-12	-0.398798	0.987	0.998	1.62407e-08	9	QPCT
1.40893e-08	-0.430487	0.899	0.969	7.26163e-05	9	NSG1
2.44152e-09	-0.468869	0.919	0.971	1.25836e-05	9	MLANA
2.00039e-08	-0.472877	0.913	0.95	0.0001031	9	CNN3
2.41886e-27	-0.515691	1	1	1.24668e-23	9	TYRP1
1.92665e-06	-0.550566	0.752	0.824	0.00992996	9	HIST1H4E
1.34219e-07	-0.561685	0.718	0.848	0.000691764	9	SEMA5A
3.08545e-07	-0.963546	0.302	0.511	0.00159024	9	APCDD1
1.561e-07	-1.39214	0.134	0.345	0.000804541	9	TTC37
6.66635e-08	-1.60244	0.101	0.315	0.000343584	9	GALNT3
3.80802e-07	-1.76099	0.752	0.815	0.00196265	9	IGKC
6.40202e-09	-2.16297	0.134	0.367	3.2996e-05	9	IGHM
1.9954e-07	-3.59138	0.02	0.189	0.00102843	9	JCHAIN

## Sheet: UKF2_DEG
p_val	avg_log2FC	pct.1	pct.2	p_val_adj	bayes_space	gene
2.4114e-07	1.28047	0.218	0.117	0.00178611	1	C17orf58
4.1942e-08	0.803633	0.434	0.304	0.00031066	1	BMERB1
2.1572e-08	0.513911	0.689	0.573	0.00015978	1	LRPAP1
1.7743e-10	0.504514	0.827	0.646	1.3142e-06	1	ARGLU1
4.8765e-13	0.475834	0.935	0.787	3.612e-09	1	SNCA
1.9707e-14	0.466445	0.922	0.792	1.4597e-10	1	G3BP2
4.7695e-11	0.465722	0.887	0.733	3.5328e-07	1	PRRC2C
1.3751e-13	0.428238	0.97	0.858	1.0185e-09	1	S100A1
2.9325e-09	0.414454	0.872	0.746	2.1721e-05	1	ACOT7
4.154e-08	0.406302	0.842	0.71	0.00030769	1	DRAP1
3.6635e-09	0.404366	0.932	0.776	2.7135e-05	1	HIST1H1E
1.2036e-19	0.402349	0.997	0.976	8.9149e-16	1	HNRNPDL
7.8583e-09	0.394262	0.862	0.71	5.8206e-05	1	MYO10
7.2591e-09	0.393849	0.877	0.76	5.3768e-05	1	CNBP
4.154e-09	0.388028	0.922	0.813	3.0768e-05	1	HNRNPUL1
1.7003e-07	0.375164	0.845	0.704	0.00125944	1	CCT3
5.6813e-14	0.361337	0.987	0.974	4.2081e-10	1	HSPA5
4.6722e-08	0.347963	0.93	0.797	0.00034607	1	PA2G4
2.5469e-08	0.339996	0.93	0.803	0.00018865	1	ARF3
2.5229e-07	0.303285	0.97	0.882	0.00186874	1	GABARAP
6.1069e-08	0.300241	0.965	0.869	0.00045234	1	SNRNP70
1.4514e-10	0.300107	0.982	0.982	1.0751e-06	1	FLNA
6.2864e-09	0.299607	0.99	0.956	4.6563e-05	1	SERF2
5.8921e-19	0.24399	1	0.999	4.3643e-15	1	EEF2
3.0877e-07	0.20009	0.774	0.604	0.00228706	1	COL1A2
6.6665e-08	0.187069	1	0.999	0.00049379	1	PFN1
4.0396e-08	-0.125581	1	1	0.00029921	1	UBC
2.4677e-08	-0.157469	1	0.999	0.00018279	1	VIM
1.0885e-06	-0.180549	1	0.994	0.00806275	1	MT2A
4.1175e-07	-0.20129	1	0.998	0.00304985	1	CD74
3.9688e-07	-0.291552	0.932	0.943	0.00293969	1	HSP90AB1
2.8497e-09	-0.305879	0.975	0.955	2.1108e-05	1	S100A4
1.1597e-07	-0.3205	0.957	0.964	0.00085897	1	ANXA1
3.7976e-11	-0.324957	1	0.997	2.8129e-07	1	HLA-DRA
1.5152e-09	-0.340778	0.982	0.993	1.1223e-05	1	HLA-DPA1
1.4173e-25	-0.370995	1	0.999	1.0498e-21	1	ACTB
1.0714e-10	-0.377427	0.942	0.921	7.936e-07	1	HNRNPA2B1
2.731e-08	-0.391025	0.92	0.92	0.00020229	1	HLA-E
1.0763e-11	-0.400299	0.942	0.931	7.9722e-08	1	SERPINE2
3.0005e-08	-0.413726	0.782	0.816	0.00022224	1	ADGRG1
7.5122e-07	-0.437514	0.266	0.425	0.00556427	1	NCOR2
2.0965e-08	-0.437561	0.84	0.845	0.00015529	1	CALR
8.5145e-07	-0.455931	0.411	0.573	0.00630671	1	COX6A1
6.1375e-07	-0.456128	0.421	0.574	0.00454607	1	AP2M1
3.0615e-07	-0.460027	0.434	0.594	0.00226767	1	KMT2E
5.7206e-07	-0.516649	0.499	0.621	0.00423728	1	COL5A3
1.2948e-07	-0.520528	0.363	0.53	0.00095903	1	CD151
3.3592e-08	-0.529555	0.416	0.588	0.00024881	1	GPX4
1.3077e-06	-0.541459	0.308	0.465	0.00968604	1	EFTUD2
1.3221e-07	-0.545879	0.351	0.515	0.0009793	1	CAPN2
2.5506e-07	-0.548674	0.268	0.429	0.0018892	1	UBALD2
4.9571e-09	-0.561536	0.484	0.629	3.6717e-05	1	L1CAM
1.8743e-07	-0.566332	0.256	0.42	0.00138826	1	STAT3
6.9468e-08	-0.572216	0.313	0.483	0.00051455	1	PFDN5
1.0601e-07	-0.572336	0.391	0.559	0.00078522	1	CSTB
6.6181e-07	-0.576197	0.253	0.402	0.00490202	1	TMEM59
1.314e-06	-0.5792	0.351	0.487	0.00973285	1	GDI2
8.6152e-09	-0.59774	0.336	0.517	6.3813e-05	1	COX4I1
1.8862e-23	-0.598406	0.952	0.975	1.3971e-19	1	FTH1
1.289e-22	-0.599502	0.98	0.993	9.5477e-19	1	B2M
2.7433e-07	-0.603425	0.288	0.447	0.00203196	1	SSR4
1.822e-09	-0.6036	0.431	0.601	1.3496e-05	1	UBB
4.7344e-07	-0.605042	0.228	0.378	0.00350678	1	KHDRBS1
1.5174e-07	-0.611217	0.348	0.498	0.00112397	1	HINT1
1.4413e-08	-0.618233	0.278	0.452	0.00010676	1	PLP2
1.4302e-07	-0.620567	0.256	0.416	0.00105933	1	TSPAN3
1.1025e-06	-0.625568	0.216	0.356	0.00816655	1	CERS2
1.2471e-21	-0.626994	0.882	0.923	9.237e-18	1	CDH19
8.5898e-09	-0.628479	0.371	0.539	6.3625e-05	1	CCNI
3.6661e-07	-0.632623	0.293	0.444	0.0027155	1	GUK1
9.6254e-09	-0.633666	0.346	0.517	7.1295e-05	1	RAB13
5.6998e-09	-0.636782	0.672	0.709	4.2218e-05	1	IFITM2
8.1645e-07	-0.637768	0.256	0.401	0.00604741	1	SPATA13
7.6369e-07	-0.637952	0.211	0.349	0.00565663	1	CTSA
9.5348e-07	-0.641186	0.228	0.372	0.00706244	1	FAM89B
2.1198e-08	-0.642541	0.283	0.456	0.00015701	1	SPTSSA
8.203e-07	-0.651447	0.216	0.359	0.00607599	1	RNASEK
5.7525e-08	-0.651639	0.256	0.421	0.00042609	1	ST5
7.051e-11	-0.65225	0.501	0.65	5.2227e-07	1	EMP1
7.9651e-07	-0.653132	0.273	0.418	0.00589977	1	PFKFB3
4.8229e-07	-0.653395	0.268	0.418	0.00357229	1	EMC10
8.0353e-07	-0.655214	0.268	0.411	0.00595178	1	CBR1
1.003e-10	-0.658277	0.356	0.554	7.4296e-07	1	HIST1H4E
2.204e-07	-0.664961	0.206	0.358	0.0016325	1	KHDRBS3
7.3964e-11	-0.666807	0.431	0.603	5.4785e-07	1	CAPNS1
4.8882e-10	-0.670709	0.301	0.488	3.6207e-06	1	NME4
1.65e-09	-0.671798	0.398	0.568	1.2221e-05	1	UBE2E3
1.9831e-09	-0.67223	0.251	0.44	1.4689e-05	1	ABHD2
1.1934e-08	-0.677838	0.293	0.462	8.8395e-05	1	HMGB1
8.2679e-09	-0.692108	0.341	0.509	6.1241e-05	1	DAG1
1.6711e-07	-0.694855	0.195	0.344	0.00123776	1	MTPN
1.3886e-15	-0.699581	0.84	0.867	1.0286e-11	1	CIITA
5.5632e-07	-0.700081	0.168	0.305	0.00412064	1	KXD1
4.9711e-07	-0.70101	0.188	0.329	0.0036821	1	TGFBR2
4.5232e-12	-0.70803	0.321	0.537	3.3503e-08	1	CANX
1.0505e-19	-0.70803	0.967	0.964	7.781e-16	1	A2M
2.6425e-07	-0.71111	0.226	0.373	0.00195728	1	38777
1.1488e-06	-0.71217	0.168	0.299	0.00850927	1	MYL12A
2.3738e-07	-0.714271	0.293	0.443	0.00175825	1	IFI27
5.0252e-07	-0.715372	0.253	0.398	0.00372215	1	TAP1
2.6183e-11	-0.72415	0.288	0.504	1.9394e-07	1	PJA2
9.338e-07	-0.726316	0.18	0.317	0.00691665	1	ETV6
5.8061e-24	-0.732414	0.887	0.923	4.3006e-20	1	FTL
2.4693e-08	-0.737405	0.263	0.435	0.0001829	1	SEMA6B
8.4612e-08	-0.743363	0.226	0.382	0.00062672	1	SPTBN1
1.9089e-07	-0.748046	0.145	0.287	0.00141394	1	TMBIM1
2.3606e-10	-0.750966	0.383	0.562	1.7485e-06	1	GPNMB
1.6103e-07	-0.751933	0.16	0.304	0.00119273	1	TRAF1
3.1073e-08	-0.754795	0.243	0.402	0.00023016	1	ATF4
4.0245e-10	-0.760818	0.278	0.468	2.9809e-06	1	ITPK1
8.1453e-10	-0.765695	0.248	0.434	6.0332e-06	1	ESYT2
4.9459e-10	-0.766924	0.326	0.506	3.6634e-06	1	SELENON
6.1248e-08	-0.768151	0.258	0.414	0.00045367	1	B4GALT5
7.8726e-09	-0.776397	0.316	0.476	5.8312e-05	1	KCTD3
4.8131e-08	-0.781279	0.221	0.372	0.00035651	1	SCARB2
7.2404e-07	-0.782231	0.165	0.297	0.00536294	1	GPM6B
2.2732e-09	-0.784651	0.193	0.371	1.6838e-05	1	KTN1
2.6734e-08	-0.787353	0.206	0.364	0.00019802	1	IL6ST
1.7185e-09	-0.788762	0.246	0.424	1.2729e-05	1	PTPA
1.3314e-08	-0.78895	0.218	0.381	9.862e-05	1	AIF1L
1.6775e-10	-0.795493	0.311	0.499	1.2425e-06	1	FKBP1A
4.6614e-07	-0.802358	0.135	0.265	0.00345273	1	GHITM
6.843e-13	-0.805043	0.373	0.578	5.0686e-09	1	CD9
1.8586e-10	-0.808892	0.256	0.445	1.3767e-06	1	KLC1
3.5091e-07	-0.823507	0.218	0.354	0.00259918	1	EIF2S3
7.1135e-07	-0.825138	0.128	0.254	0.00526901	1	PML
3.9781e-13	-0.826846	0.268	0.494	2.9465e-09	1	TMED10
3.607e-13	-0.835063	0.348	0.559	2.6717e-09	1	HPCAL1
9.9953e-07	-0.839855	0.165	0.293	0.00740354	1	SH3GLB1
9.9211e-08	-0.84048	0.231	0.376	0.00073485	1	CAPRIN1
1.2686e-12	-0.841297	0.559	0.67	9.3962e-09	1	SLC20A1
1.7942e-07	-0.845534	0.18	0.321	0.00132898	1	UBE2I
2.1542e-08	-0.850324	0.158	0.309	0.00015956	1	TAP2
7.8435e-08	-0.860468	0.158	0.3	0.00058097	1	SNTB1
3.4949e-09	-0.863825	0.206	0.373	2.5886e-05	1	IFITM1
5.3276e-10	-0.870716	0.206	0.384	3.9461e-06	1	SFT2D2
5.0088e-08	-0.884187	0.138	0.282	0.000371	1	LAMP2
5.107e-07	-0.88936	0.16	0.291	0.00378274	1	ENG
1.5184e-10	-0.897256	0.321	0.494	1.1247e-06	1	SLC26A2
7.9947e-07	-0.905332	0.178	0.304	0.0059217	1	ATP2B1
2.086e-13	-0.912721	0.343	0.546	1.5451e-09	1	CLIC4
1.2715e-07	-0.923043	0.143	0.278	0.0009418	1	PPP1CB
2.4939e-33	-0.932274	0.937	0.977	1.8472e-29	1	IFITM3
1.973e-07	-0.93345	0.133	0.263	0.00146139	1	LYPD1
1.4773e-11	-0.941452	0.208	0.402	1.0942e-07	1	AHR
8.6414e-08	-0.949508	0.11	0.243	0.00064007	1	SEPTIN10
9.4486e-10	-0.954468	0.198	0.368	6.9986e-06	1	ANP32B
1.1337e-06	-0.958574	0.12	0.237	0.00839752	1	VPS29
4.8622e-10	-0.96253	0.336	0.501	3.6015e-06	1	FABP5
1.1604e-06	-0.963685	0.095	0.208	0.00859523	1	SEPTIN8
3.7552e-08	-0.994254	0.18	0.324	0.00027815	1	ERRFI1
4.7425e-14	-0.998327	0.281	0.493	3.5128e-10	1	SCD
4.0887e-08	-1.02996	0.125	0.263	0.00030285	1	POLD4
7.2796e-12	-1.03436	0.221	0.417	5.392e-08	1	TNFRSF21
5.0129e-08	-1.03743	0.16	0.299	0.0003713	1	LEF1
1.1247e-06	-1.05381	0.093	0.204	0.0083309	1	CAND1
4.5952e-08	-1.0591	0.098	0.228	0.00034037	1	PCDH1
1.4031e-13	-1.06047	0.256	0.463	1.0393e-09	1	MVP
4.3011e-13	-1.07352	0.233	0.441	3.1858e-09	1	JUNB
9.1552e-07	-1.08	0.06	0.162	0.00678128	1	ZFP36
5.0169e-09	-1.09471	0.118	0.263	3.716e-05	1	TJP1
5.8887e-08	-1.0963	0.09	0.217	0.00043618	1	KCNK3
1.502e-07	-1.0963	0.11	0.234	0.0011125	1	RBM25
5.3825e-08	-1.10194	0.08	0.205	0.00039868	1	PSMB9
6.283e-09	-1.1167	0.128	0.273	4.6538e-05	1	MPZ
7.5268e-10	-1.13334	0.133	0.291	5.5751e-06	1	NRP1
1.2592e-08	-1.15281	0.103	0.241	9.3268e-05	1	ITGB3
4.2716e-08	-1.15359	0.073	0.193	0.0003164	1	AKR1A1
1.9219e-08	-1.16746	0.103	0.236	0.00014236	1	PAQR8
5.0017e-08	-1.17516	0.103	0.231	0.00037048	1	AC015802.6
1.8125e-07	-1.19042	0.068	0.178	0.00134255	1	SLC35F6
3.4645e-07	-1.21968	0.075	0.185	0.00256616	1	NFKBIA
4.5008e-07	-1.22957	0.06	0.164	0.00333376	1	DTX3L
2.8302e-11	-1.2298	0.138	0.311	2.0963e-07	1	TUBB2A
2.8689e-07	-1.27919	0.078	0.188	0.00212502	1	SDC2
9.0808e-11	-1.28185	0.135	0.3	6.7261e-07	1	PSMB8
4.2491e-07	-1.28438	0.055	0.157	0.00314727	1	CYP27C1
1.2888e-06	-1.32818	0.06	0.157	0.00954624	1	EFNA1
2.7305e-09	-1.34914	0.085	0.223	2.0225e-05	1	CRIM1
2.6084e-33	-1.37278	0.409	0.694	1.932e-29	1	APP
3.8953e-11	-1.37348	0.115	0.281	2.8852e-07	1	GBP2
8.9927e-08	-1.38212	0.075	0.19	0.00066609	1	CLPP
4.2689e-11	-1.40847	0.08	0.237	3.162e-07	1	ANKH
1.0049e-10	-1.49902	0.07	0.218	7.4436e-07	1	STAT1
1.4924e-11	-1.51539	0.095	0.26	1.1054e-07	1	SEMA4B
1.5141e-08	-1.5208	0.08	0.205	0.00011215	1	VEGFA
6.7253e-08	-1.54202	0.048	0.154	0.00049814	1	NGEF
7.3122e-21	-1.58774	0.201	0.461	5.4162e-17	1	CEBPD
2.2023e-14	-1.60615	0.083	0.273	1.6312e-10	1	DDR1
4.4546e-07	-1.70803	0.035	0.125	0.0032995	1	LOXL2
4.986e-15	-1.72239	0.1	0.294	3.6931e-11	1	DYNLT3
1.1959e-11	-1.75727	0.078	0.233	8.8582e-08	1	BCL3
3.1886e-09	-1.76486	0.055	0.178	2.3618e-05	1	NNMT
2.6051e-13	-1.80692	0.08	0.253	1.9296e-09	1	ANO4
4.3173e-19	-1.80709	0.098	0.334	3.1978e-15	1	CYGB
8.7828e-15	-1.81888	0.07	0.257	6.5054e-11	1	TFPI2
1.1705e-09	-1.82109	0.043	0.165	8.6696e-06	1	COL8A1
1.8004e-10	-1.88491	0.05	0.183	1.3336e-06	1	ADAMTS9
4.0318e-09	-2.04507	0.04	0.154	2.9864e-05	1	CCN5
7.9759e-08	-2.05381	0.023	0.113	0.00059078	1	CTSO
6.1019e-08	-2.14544	0.023	0.114	0.00045197	1	OAS2
1.4273e-20	-2.39755	0.095	0.334	1.0572e-16	1	SERPINA3
7.8195e-13	-2.75242	0.018	0.154	5.7919e-09	1	NRXN3
1.4868e-23	-2.86902	0.05	0.298	1.1012e-19	1	ANGPTL4
3.3513e-07	-5.18376	0	0.062	0.0024823	1	PLA2G2A
3.8814e-30	6.45867	0.127	0.002	2.8749e-26	2	DSC2
1.6236e-73	6.25077	0.305	0.005	1.2026e-69	2	TRIM29
4.0465e-30	6.11471	0.127	0.002	2.9973e-26	2	SERPINB5
1.5455e-95	6.06116	0.458	0.014	1.1447e-91	2	AQP3
5.7089e-25	5.99924	0.093	0.001	4.2286e-21	2	CYP4F22
1.2678e-22	5.99924	0.085	0.001	9.3905e-19	2	KLK10
2.8074e-20	5.99924	0.076	0.001	2.0795e-16	2	COL17A1
2.6615e-13	5.99924	0.042	0	1.9714e-09	2	ARHGEF4
2.837e-69	5.93784	0.322	0.009	2.1014e-65	2	GJB2
1.2557e-78	5.91677	0.356	0.009	9.3012e-75	2	DSG1
3.7054e-35	5.84723	0.153	0.003	2.7446e-31	2	DSP
2.0259e-32	5.7362	0.136	0.002	1.5005e-28	2	GJB6
1.5693e-20	5.7362	0.085	0.002	1.1624e-16	2	IL36RN
2.8307e-20	5.7362	0.076	0.001	2.0967e-16	2	CDA
1.494e-123	5.64575	0.992	0.153	1.107e-119	2	KRT16
4.7867e-58	5.63667	0.263	0.006	3.5455e-54	2	DMKN
4.858e-75	5.6315	0.381	0.014	3.5984e-71	2	SLPI
5.027e-123	5.60589	0.847	0.081	3.724e-119	2	KRT5
6.1829e-18	5.5842	0.068	0.001	4.5797e-14	2	FAM83A
4.015e-120	5.57997	0.992	0.171	2.974e-116	2	S100A8
1.0411e-45	5.56402	0.254	0.012	7.7114e-42	2	IVL
3.494e-104	5.52975	0.602	0.035	2.588e-100	2	KRT6B
6.5075e-38	5.52975	0.169	0.004	4.8201e-34	2	KLK8
9.529e-109	5.50542	0.525	0.017	7.058e-105	2	CSTA
2.4164e-45	5.4649	0.203	0.005	1.7898e-41	2	S100A7A
3.0993e-36	5.4649	0.169	0.005	2.2957e-32	2	LY6D
2.1283e-67	5.45867	0.373	0.017	1.5765e-63	2	PI3
4.344e-79	5.45175	0.475	0.028	3.2176e-75	2	S100A14
1.022e-117	5.43474	0.61	0.026	7.571e-114	2	S100A7
1.21e-112	5.43381	0.661	0.041	8.959e-109	2	KRTDAP
4.3796e-71	5.41427	0.373	0.015	3.2439e-67	2	SBSN
1.7316e-42	5.41427	0.186	0.004	1.2826e-38	2	CDSN
4.0187e-35	5.41427	0.153	0.003	2.9766e-31	2	KLK5
1.4583e-30	5.41427	0.136	0.003	1.0801e-26	2	LAD1
1.5913e-20	5.41427	0.085	0.002	1.1786e-16	2	NCCRP1
1.051e-120	5.35783	0.924	0.119	7.787e-117	2	KRT14
3.249e-114	5.34543	0.975	0.165	2.406e-110	2	S100A9
4.0514e-31	5.28874	0.144	0.004	3.0009e-27	2	CASP14
4.4711e-89	5.23627	0.475	0.021	3.3118e-85	2	SPRR2A
1.3509e-21	5.17981	0.102	0.003	1.0006e-17	2	KLK7
8.5478e-76	5.15843	0.39	0.015	6.3314e-72	2	SPRR2G
6.3109e-65	5.15124	0.339	0.014	4.6745e-61	2	SPRR2D
5.7827e-16	5.15124	0.068	0.002	4.2833e-12	2	TMPRSS11D
4.6468e-61	5.02196	0.339	0.016	3.4419e-57	2	PKP1
7.567e-132	4.99924	0.746	0.042	5.605e-128	2	KRT1
8.4511e-24	4.99924	0.11	0.003	6.2597e-20	2	EVPL
1.3509e-21	4.99924	0.102	0.003	1.0006e-17	2	DSG3
1.0303e-13	4.99924	0.059	0.002	7.6317e-10	2	TP63
1.0303e-13	4.99924	0.059	0.002	7.6317e-10	2	RHCG
1.5155e-29	4.92885	0.144	0.005	1.1225e-25	2	SPRR1B
2.5426e-41	4.90904	0.212	0.008	1.8833e-37	2	KLK6
1.3849e-21	4.8997	0.102	0.003	1.0258e-17	2	DEFB1
9.6761e-19	4.8737	0.085	0.002	7.1671e-15	2	SULT2B1
3.3073e-12	4.8737	0.059	0.002	2.4497e-08	2	CITED4
1.7218e-11	4.82931	0.051	0.002	1.2753e-07	2	IL1RN
6.7671e-29	4.76791	0.153	0.006	5.0124e-25	2	CRCT1
2.9993e-30	4.7362	0.153	0.006	2.2216e-26	2	SLURP2
4.0176e-20	4.7362	0.102	0.004	2.9758e-16	2	RHOD
2.3029e-31	4.70378	0.203	0.014	1.7058e-27	2	PERP
8.7433e-17	4.69438	0.093	0.005	6.4761e-13	2	TGM1
5.417e-29	4.68558	0.229	0.021	4.0123e-25	2	TUBA4A
2.1154e-52	4.60069	0.339	0.022	1.5669e-48	2	CNFN
1.062e-29	4.55178	0.161	0.007	7.8666e-26	2	RAB25
3.2244e-17	4.55178	0.085	0.003	2.3883e-13	2	TACSTD2
3.0042e-47	4.50738	0.305	0.02	2.2252e-43	2	JUP
4.3719e-33	4.48827	0.212	0.014	3.2383e-29	2	LYPD3
2.6954e-33	4.4649	0.195	0.01	1.9965e-29	2	CALML5
8.7506e-24	4.41427	0.169	0.014	6.4816e-20	2	SDC1
5.2764e-13	4.41427	0.068	0.003	3.9082e-09	2	LAMC2
2.6655e-09	4.41427	0.042	0.002	1.9743e-05	2	HAS3
2.4868e-35	4.33349	0.551	0.131	1.842e-31	2	S100A2
9.262e-15	4.30736	0.085	0.005	6.8604e-11	2	C19orf33
4.5397e-13	4.27677	0.093	0.008	3.3625e-09	2	MALL
5.9529e-11	4.09235	0.059	0.003	4.4093e-07	2	C6orf132
2.6371e-24	4.03576	0.153	0.01	1.9533e-20	2	SPINK5
2.2567e-80	3.93821	0.89	0.201	1.6715e-76	2	KRT10
1.1835e-15	3.79278	0.102	0.007	8.766e-12	2	SPINT2
1.8218e-12	3.25381	0.11	0.013	1.3494e-08	2	PKP3
7.0252e-15	3.24762	0.212	0.041	5.2036e-11	2	CRABP2
5.48e-18	3.22786	0.186	0.025	4.059e-14	2	GJA1
1.3491e-11	2.96176	0.127	0.019	9.9925e-08	2	PPL
2.6037e-08	2.82931	0.093	0.015	0.00019285	2	MAPK13
8.9494e-07	2.82931	0.085	0.016	0.00662881	2	NECTIN1
5.1141e-09	2.64874	0.127	0.025	3.788e-05	2	SLC2A1
1.1996e-39	2.62565	0.814	0.315	8.8855e-36	2	VGF
1.9875e-10	2.17481	0.229	0.065	1.4722e-06	2	LGALSL
9.3209e-07	2.12149	0.136	0.037	0.00690397	2	FSCN1
8.8322e-08	2.07724	0.144	0.037	0.0006542	2	ISCA2
8.2864e-08	2.07547	0.136	0.033	0.00061377	2	PTGS1
4.4043e-07	2.05672	0.127	0.032	0.00326229	2	CHRNA6
5.3889e-09	2.03576	0.161	0.039	3.9915e-05	2	FLNB
6.9471e-13	1.94479	0.339	0.11	5.1457e-09	2	DCN
5.8068e-11	1.79861	0.237	0.065	4.3011e-07	2	ZNF3
2.9002e-07	1.78809	0.178	0.056	0.0021482	2	TTC8
9.088e-11	1.7328	0.331	0.118	6.7315e-07	2	GLTP
4.4231e-07	1.72977	0.195	0.066	0.0032762	2	IFFO2
4.589e-12	1.71578	0.339	0.114	3.399e-08	2	TNC
3.2577e-10	1.67319	0.263	0.082	2.413e-06	2	ACOX3
1.1518e-09	1.65422	0.246	0.076	8.5316e-06	2	ALDH16A1
4.909e-12	1.60692	0.314	0.098	3.6361e-08	2	EPB41L3
6.9932e-09	1.59485	0.254	0.087	5.1799e-05	2	GZF1
5.7651e-08	1.58287	0.237	0.083	0.00042702	2	MARCKS
5.1916e-08	1.57602	0.237	0.083	0.00038454	2	VAV2
6.6849e-08	1.53558	0.237	0.083	0.00049515	2	SHB
3.2465e-09	1.47023	0.314	0.12	2.4047e-05	2	KLF4
6.0378e-08	1.46831	0.246	0.087	0.00044722	2	PSMB10
9.3827e-08	1.46674	0.22	0.074	0.00069498	2	TMEM60
4.3153e-08	1.45734	0.254	0.091	0.00031963	2	BRI3BP
1.1328e-14	1.43076	0.525	0.215	8.3903e-11	2	MYD88
1.6981e-24	1.39471	0.924	0.72	1.2578e-20	2	HLA-DOA
5.7512e-07	1.37095	0.28	0.118	0.00425988	2	MTA3
1.3018e-06	1.34152	0.22	0.083	0.00964209	2	THEMIS2
8.0239e-07	1.33335	0.212	0.076	0.00594332	2	CTSK
1.0851e-07	1.30736	0.339	0.153	0.00080374	2	TBC1D22A
3.548e-07	1.28257	0.263	0.103	0.00262804	2	ARL14EP
4.8513e-07	1.28079	0.322	0.148	0.00359334	2	ZFYVE28
1.0824e-06	1.27341	0.271	0.114	0.00801729	2	SMYD5
3.1946e-09	1.26617	0.441	0.21	2.3662e-05	2	ZSCAN18
6.8651e-10	1.26588	0.407	0.171	5.0849e-06	2	GTF2IRD1
1.4864e-09	1.25899	0.424	0.188	1.101e-05	2	DNAJC1
1.5451e-13	1.24869	0.703	0.413	1.1445e-09	2	C4orf3
7.2642e-10	1.22808	0.373	0.146	5.3806e-06	2	TDRP
2.0827e-10	1.22665	0.492	0.228	1.5427e-06	2	MED13L
3.165e-07	1.22163	0.331	0.149	0.00234429	2	RASSF1
7.4373e-08	1.2205	0.314	0.129	0.00055088	2	SEC24D
7.6663e-10	1.21241	0.754	0.494	5.6785e-06	2	IFI6
3.6587e-09	1.20668	0.415	0.184	2.71e-05	2	SRP19
4.4454e-07	1.20538	0.398	0.207	0.00329271	2	FAF2
3.332e-07	1.20482	0.297	0.125	0.00246803	2	ASXL1
1.3492e-06	1.19188	0.339	0.165	0.00999343	2	ETV3
2.7415e-15	1.18085	0.669	0.325	2.0306e-11	2	TARS
1.1882e-06	1.17481	0.347	0.169	0.00880077	2	ZNF330
4.1334e-07	1.17178	0.356	0.169	0.0030616	2	TOMM5
3.1392e-08	1.15441	0.441	0.224	0.00023252	2	FBXO32
1.3037e-08	1.14524	0.517	0.28	9.6563e-05	2	UCN2
2.1783e-07	1.14418	0.356	0.164	0.0016135	2	TRADD
2.6046e-07	1.14281	0.39	0.195	0.00192925	2	RBM14
1.4545e-07	1.13505	0.331	0.143	0.00107737	2	HMOX1
2.0808e-08	1.13134	0.415	0.194	0.00015412	2	MEPCE
2.3822e-15	1.13118	0.712	0.346	1.7645e-11	2	RBM42
2.3063e-12	1.11536	0.686	0.378	1.7082e-08	2	GATAD2A
5.2081e-08	1.10817	0.381	0.172	0.00038576	2	DNPEP
3.7589e-07	1.09801	0.356	0.166	0.00278423	2	DCTD
2.1906e-07	1.0978	0.381	0.18	0.00162259	2	CLUH
2.4541e-08	1.09235	0.424	0.198	0.00018178	2	BICD2
5.4667e-11	1.08503	0.627	0.334	4.0492e-07	2	PCED1A
1.8355e-10	1.08307	0.542	0.264	1.3595e-06	2	HTRA1
2.5921e-07	1.07414	0.407	0.201	0.00192	2	PSME2
1.2688e-10	1.0722	0.627	0.36	9.3979e-07	2	CYTH2
2.0879e-08	1.0685	0.415	0.192	0.00015465	2	DCAF16
3.3058e-07	1.0628	0.398	0.196	0.00244864	2	YY1
2.0201e-09	1.06064	0.559	0.302	1.4963e-05	2	B4GALNT4
9.91e-07	1.0517	0.288	0.121	0.00734032	2	CCNYL1
4.5999e-09	1.04382	0.5	0.252	3.4072e-05	2	PSENEN
8.3199e-09	1.03898	0.475	0.23	6.1625e-05	2	PI4K2A
9.3346e-09	1.03675	0.424	0.189	6.9141e-05	2	ODF2L
6.6449e-08	1.03159	0.517	0.295	0.00049219	2	NME3
7.3151e-11	1.02834	0.602	0.297	5.4183e-07	2	CCDC12
4.3797e-07	1.02667	0.449	0.241	0.00324406	2	TUT7
3.2976e-09	1.01374	0.492	0.238	2.4425e-05	2	GRK2
9.7586e-11	1.01101	0.619	0.319	7.2282e-07	2	CASP4
8.0046e-07	1.01092	0.398	0.201	0.00592899	2	KDM5B
4.6362e-09	1.00412	0.593	0.335	3.434e-05	2	SMCHD1
2.3196e-07	1.00246	0.407	0.199	0.00171812	2	MTG1
2.7973e-07	0.999236	0.432	0.222	0.00207193	2	USP36
1.2549e-07	0.993697	0.449	0.227	0.0009295	2	HARS
8.0641e-07	0.958297	0.458	0.254	0.0059731	2	FAM193B
3.209e-09	0.954842	0.593	0.312	2.3769e-05	2	CRELD2
6.9386e-07	0.954842	0.508	0.285	0.00513944	2	HAGH
5.2721e-09	0.950571	0.712	0.444	3.9051e-05	2	HIST1H4A
1.5103e-08	0.947324	0.534	0.285	0.00011187	2	RILPL1
1.0923e-07	0.941987	0.678	0.432	0.00080906	2	FABP5
4.7255e-08	0.936572	0.576	0.347	0.00035002	2	TMEM230
2.4796e-10	0.936226	0.703	0.428	1.8366e-06	2	BANF1
7.1009e-09	0.935301	0.534	0.269	5.2597e-05	2	PCSK7
3.0087e-23	0.933775	0.992	0.958	2.2286e-19	2	HLA-C
1.9612e-07	0.930756	0.568	0.337	0.00145267	2	RNF182
9.091e-07	0.911773	0.5	0.283	0.00673373	2	PDLIM2
2.1453e-07	0.900151	0.5	0.272	0.00158902	2	DDX54
2.7233e-07	0.897927	0.593	0.375	0.00201712	2	CREBZF
3.2761e-08	0.893441	0.559	0.303	0.00024266	2	S100A6
1.6186e-16	0.886202	0.958	0.804	1.1989e-12	2	GSTP1
4.6776e-08	0.881238	0.576	0.328	0.00034647	2	NDUFA2
8.8376e-08	0.878998	0.627	0.397	0.0006546	2	CAPN1
2.949e-10	0.876308	0.72	0.435	2.1843e-06	2	GATD1
1.1975e-07	0.872379	0.483	0.246	0.000887	2	COMMD4
2.6111e-07	0.869953	0.508	0.28	0.00193406	2	DBN1
2.1406e-08	0.861604	0.661	0.391	0.00015856	2	PITPNA
6.6225e-09	0.857129	0.602	0.326	4.9053e-05	2	RTF2
3.683e-13	0.854792	0.881	0.601	2.728e-09	2	AURKAIP1
6.4608e-08	0.844537	0.619	0.382	0.00047855	2	CLTA
2.4832e-07	0.833427	0.61	0.378	0.00183933	2	SRRT
2.4138e-07	0.825342	0.619	0.388	0.00178788	2	PDCD5
2.357e-07	0.823386	0.695	0.477	0.00174587	2	CAPZA2
9.1435e-07	0.822827	0.593	0.369	0.00677259	2	ROMO1
2.8116e-07	0.820322	0.517	0.281	0.00208255	2	CHCHD1
1.6251e-08	0.820092	0.729	0.459	0.00012037	2	BST2
1.7953e-09	0.809284	0.754	0.462	1.3297e-05	2	HP1BP3
3.0961e-08	0.808371	0.636	0.375	0.00022933	2	CNDP2
5.6393e-07	0.803706	0.61	0.396	0.00417703	2	GOLPH3
1.5683e-24	0.803381	0.983	0.961	1.1616e-20	2	HLA-DMA
2.1448e-07	0.793015	0.695	0.463	0.00158864	2	REXO2
3.869e-07	0.787995	0.61	0.37	0.00286577	2	PDHB
1.447e-09	0.784347	0.771	0.532	1.0718e-05	2	P4HB
5.2309e-07	0.778906	0.517	0.285	0.00387453	2	PSMD2
4.1589e-07	0.777579	0.61	0.377	0.0030805	2	ZBTB7A
2.0729e-08	0.775372	0.636	0.359	0.00015354	2	GNPTG
1.9028e-08	0.773238	0.907	0.855	0.00014094	2	CIITA
1.7847e-07	0.76919	0.576	0.318	0.00132192	2	DIDO1
4.7494e-07	0.766699	0.636	0.398	0.0035179	2	MRFAP1L1
2.6556e-09	0.764199	0.805	0.587	1.967e-05	2	CDK6
6.4811e-07	0.75954	0.61	0.374	0.00480059	2	CYC1
2.1676e-12	0.747275	0.932	0.742	1.6055e-08	2	OS9
8.3002e-07	0.736201	0.568	0.327	0.00614796	2	VDAC3
2.9528e-08	0.733891	0.788	0.568	0.00021871	2	COPG1
1.3629e-08	0.73349	0.831	0.621	0.00010095	2	POLR2F
3.3044e-10	0.71431	0.839	0.631	2.4476e-06	2	LUC7L3
2.4034e-16	0.712993	1	0.976	1.7802e-12	2	HSPA5
6.6628e-07	0.708004	0.678	0.461	0.00493516	2	ANP32E
1.2899e-06	0.699735	0.585	0.352	0.00955455	2	SLC39A13
2.6255e-11	0.68517	0.949	0.78	1.9447e-07	2	CNBP
9.4454e-07	0.681686	0.61	0.357	0.00699617	2	CLPTM1L
6.6743e-08	0.679495	0.831	0.594	0.00049436	2	ATP5IF1
2.3021e-10	0.668293	0.907	0.834	1.7052e-06	2	ARF3
4.6124e-12	0.653354	0.941	0.905	3.4164e-08	2	GABARAP
7.1792e-10	0.641177	0.932	0.836	5.3176e-06	2	HNRNPUL1
7.1126e-09	0.639674	0.881	0.773	5.2683e-05	2	ACOT7
6.3234e-09	0.615368	0.856	0.606	4.6838e-05	2	COL3A1
8.4626e-08	0.61407	0.898	0.738	0.00062682	2	PPIB
1.2407e-15	0.599711	0.992	0.963	9.1902e-12	2	SERF2
3.6105e-09	0.595284	0.864	0.683	2.6743e-05	2	ARGLU1
1.1914e-07	0.594845	0.839	0.642	0.00088248	2	NFIC
2.7776e-08	0.568093	0.932	0.82	0.00020574	2	G3BP2
2.0993e-07	0.497582	0.949	0.909	0.00155495	2	HSPB1
5.2353e-07	0.459951	0.949	0.899	0.00387782	2	MARCKSL1
1.3514e-09	0.445326	0.983	0.988	1.001e-05	2	EID1
3.598e-07	0.371096	1	0.981	0.00266502	2	HNRNPDL
2.4204e-07	-0.172173	0.898	0.968	0.00179282	2	ANXA1
5.8265e-09	-0.365127	0.983	0.998	4.3157e-05	2	S100B
9.7827e-07	-0.381402	0.992	0.998	0.00724603	2	HLA-DRA
3.4402e-13	-0.448657	0.992	1	2.5482e-09	2	ACTB
5.6846e-07	-0.463062	0.864	0.948	0.0042106	2	HSPA8
1.4349e-09	-0.489408	0.924	0.986	1.0628e-05	2	ITGA3
2.3315e-26	-0.552997	0.992	1	1.727e-22	2	VIM
1.5692e-07	-0.558464	0.78	0.901	0.00116228	2	S100A1
1.1049e-07	-0.558865	0.788	0.94	0.0008184	2	HNRNPA2B1
1.4294e-09	-0.568514	0.881	0.993	1.0587e-05	2	SPARC
1.0228e-06	-0.575831	0.627	0.803	0.00757577	2	ZCCHC24
2.7614e-08	-0.592922	0.78	0.917	0.00020454	2	SDC3
2.038e-16	-0.596715	0.975	0.998	1.5095e-12	2	CD63
8.2467e-08	-0.61741	0.712	0.859	0.00061084	2	OAZ1
2.3044e-10	-0.624844	0.924	0.973	1.7068e-06	2	FTH1
2.8416e-12	-0.6784	0.864	0.97	2.1048e-08	2	S100A4
3.5028e-12	-0.690445	0.864	0.947	2.5945e-08	2	HSP90AB1
3.6327e-09	-0.732742	0.636	0.839	2.6908e-05	2	FBXO7
2.0051e-10	-0.751395	0.627	0.847	1.4852e-06	2	ANXA5
1.3491e-06	-0.801131	0.483	0.669	0.0099925	2	GAS7
1.031e-12	-0.80716	0.805	0.937	7.6365e-09	2	EEF1G
1.1041e-09	-0.831706	0.627	0.807	8.1783e-06	2	TOMM7
1.1717e-10	-0.847901	0.924	0.97	8.6786e-07	2	IFITM3
2.0653e-14	-0.888546	0.746	0.921	1.5298e-10	2	EIF4B
4.0529e-17	-0.919377	0.847	0.953	3.002e-13	2	TIMP1
1.816e-13	-0.937502	0.763	0.927	1.3451e-09	2	FTL
1.2784e-16	-0.937926	0.754	0.952	9.4688e-13	2	SERPINE2
8.4697e-07	-0.943804	0.441	0.614	0.00627353	2	DUSP4
5.7021e-14	-1.0139	0.653	0.862	4.2236e-10	2	CALR
4.3664e-08	-1.16865	0.347	0.572	0.00032342	2	SPRY4
3.9846e-16	-1.17317	0.5	0.812	2.9514e-12	2	ATP1A1
2.9733e-09	-1.26205	0.407	0.604	2.2023e-05	2	L1CAM
3.7785e-25	-1.30362	0.814	0.979	2.7987e-21	2	A2M
4.5209e-08	-1.56695	0.237	0.464	0.00033486	2	FKBP1A
1.2995e-06	-1.66135	0.136	0.346	0.00962514	2	SCARB2
9.5066e-15	-1.77318	0.331	0.638	7.0415e-11	2	APP
5.2101e-07	-3.00779	0.025	0.219	0.00385914	2	TFPI2
1.4122e-08	-3.98661	0.017	0.246	0.0001046	2	ANGPTL4
2.642e-11	0.646606	0.642	0.499	1.957e-07	3	SPRY4
2.6693e-09	0.645933	0.542	0.393	1.9772e-05	3	PMEL
2.5942e-08	0.286031	0.938	0.861	0.00019215	3	S100A1
8.7244e-09	0.237602	1	0.937	6.4621e-05	3	S100A4
2.0121e-07	-0.217617	0.952	0.972	0.00149037	3	TYR
6.9952e-07	-0.22732	0.937	0.964	0.00518137	3	ENO1
1.6035e-10	-0.238428	0.992	0.999	1.1877e-06	3	EIF4A1
7.6467e-08	-0.243225	0.95	0.966	0.00056639	3	ITM2B
7.8549e-07	-0.257971	0.854	0.919	0.00581815	3	PCBP1
8.714e-07	-0.2816	0.869	0.907	0.00645449	3	MELTF
5.286e-09	-0.301633	0.956	0.972	3.9154e-05	3	SERF2
1.4119e-19	-0.303781	1	0.998	1.0458e-15	3	PSAP
8.6462e-09	-0.309197	0.823	0.911	6.4042e-05	3	EIF4H
7.9632e-10	-0.318042	0.956	0.97	5.8984e-06	3	RCAN1
7.2311e-15	-0.337584	0.965	0.982	5.3561e-11	3	LGALS3BP
8.0137e-07	-0.351176	0.627	0.775	0.00593573	3	PDIA6
2.9001e-08	-0.366057	0.785	0.874	0.00021481	3	ARF3
7.7993e-10	-0.377161	0.863	0.928	5.7769e-06	3	MARCKSL1
9.965e-07	-0.386294	0.548	0.694	0.0073811	3	POLR2F
2.2889e-07	-0.38769	0.456	0.624	0.0016954	3	SH3BGRL3
1.2346e-08	-0.388757	0.652	0.824	9.1443e-05	3	OS9
1.1169e-06	-0.390414	0.379	0.522	0.00827318	3	YWHAG
4.8495e-08	-0.390757	0.487	0.668	0.0003592	3	GDI1
2.4319e-19	-0.410456	0.996	0.999	1.8013e-15	3	HLA-DRA
1.368e-14	-0.418616	0.969	0.984	1.0132e-10	3	HSPA5
3.7806e-08	-0.421866	0.544	0.7	0.00028003	3	VDAC1
4.1703e-08	-0.42554	0.325	0.493	0.00030889	3	KCTD3
3.5883e-37	-0.433961	0.998	0.999	2.6579e-33	3	CD74
3.5092e-07	-0.43601	0.408	0.564	0.00259928	3	CTNNA1
3.2838e-07	-0.438148	0.535	0.68	0.00243234	3	AURKAIP1
2.2981e-08	-0.441366	0.402	0.578	0.00017022	3	FASN
6.519e-08	-0.456092	0.45	0.614	0.00048286	3	P4HB
5.3261e-09	-0.46573	0.463	0.639	3.945e-05	3	TPP1
5.759e-07	-0.468629	0.388	0.535	0.0042657	3	ANP32E
1.1465e-09	-0.470759	0.606	0.744	8.4922e-06	3	FAM20C
1.0084e-06	-0.471004	0.279	0.419	0.00746905	3	TMX1
6.1066e-09	-0.480465	0.5	0.674	4.5231e-05	3	CSGALNACT1
1.7013e-07	-0.484773	0.29	0.445	0.00126017	3	COX6C
6.1878e-23	-0.489078	0.929	0.984	4.5833e-19	3	HLA-DMA
2.5143e-08	-0.491468	0.329	0.5	0.00018624	3	SLC39A1
7.9268e-22	-0.502108	0.99	0.989	5.8714e-18	3	HLA-DPA1
5.8651e-07	-0.512717	0.29	0.431	0.00434429	3	RUNX1
2.1378e-28	-0.518502	0.981	0.992	1.5834e-24	3	EID1
1.9289e-07	-0.527239	0.306	0.459	0.00142875	3	BIN3
6.2502e-07	-0.532918	0.319	0.459	0.00462952	3	SPTSSA
2.0552e-14	-0.5404	0.675	0.848	1.5223e-10	3	ACOT7
1.6951e-14	-0.547687	0.627	0.828	1.2556e-10	3	PPIB
4.2907e-08	-0.550534	0.358	0.512	0.00031782	3	SELENON
7.744e-07	-0.557627	0.271	0.411	0.00573595	3	RFX5
1.0484e-08	-0.557741	0.317	0.487	7.7657e-05	3	YIPF3
8.6481e-11	-0.587488	0.473	0.655	6.4056e-07	3	COPG1
6.801e-08	-0.589168	0.256	0.41	0.00050375	3	VCP
1.2541e-11	-0.589367	0.379	0.586	9.2893e-08	3	NDUFA13
1.0323e-22	-0.595343	0.877	0.946	7.6461e-19	3	HLA-E
1.3413e-06	-0.599509	0.254	0.38	0.00993537	3	SFT2D2
9.4861e-08	-0.600442	0.327	0.467	0.00070263	3	CERCAM
2.8242e-11	-0.601876	0.619	0.746	2.0919e-07	3	IFITM2
4.2009e-08	-0.610677	0.3	0.452	0.00031116	3	STAT2
7.0744e-07	-0.612107	0.163	0.289	0.00524004	3	MYD88
2.2676e-09	-0.613884	0.379	0.546	1.6796e-05	3	BST2
1.8917e-10	-0.619572	0.327	0.52	1.4012e-06	3	MLF2
5.3915e-07	-0.622729	0.196	0.329	0.00399346	3	SDF2L1
1.1485e-31	-0.625131	0.973	0.986	8.5071e-28	3	HLA-DPB1
3.9541e-07	-0.626229	0.219	0.352	0.00292878	3	CHCHD1
5.4676e-12	-0.633715	0.356	0.561	4.0498e-08	3	ACLY
8.3753e-09	-0.636382	0.277	0.433	6.2036e-05	3	XBP1
1.0858e-07	-0.636485	0.219	0.361	0.00080423	3	FAM120A
4.2639e-07	-0.637163	0.258	0.393	0.00315827	3	BMERB1
3.8534e-12	-0.639092	0.369	0.567	2.8542e-08	3	CCDC71L
7.0733e-07	-0.642357	0.283	0.416	0.00523921	3	ICAM1
3.9417e-11	-0.642384	0.35	0.541	2.9196e-07	3	TAPBP
1.318e-06	-0.647498	0.221	0.345	0.0097624	3	NUDC
2.3008e-07	-0.651857	0.225	0.362	0.00170419	3	FCRLA
3.1142e-07	-0.656768	0.24	0.374	0.00230667	3	CCDC12
1.1901e-07	-0.657146	0.313	0.456	0.00088154	3	CLTA
5.3561e-08	-0.660073	0.233	0.38	0.00039673	3	B4GALNT4
1.1402e-07	-0.660247	0.179	0.315	0.00084453	3	CDC42BPB
4.1261e-07	-0.666368	0.275	0.403	0.00305622	3	TARS
1.6534e-29	-0.672967	0.948	0.968	1.2247e-25	3	HLA-C
4.1643e-07	-0.676697	0.279	0.409	0.00308452	3	TNFRSF21
3.1177e-07	-0.686157	0.219	0.352	0.00230927	3	PDLIM2
3.2217e-07	-0.686661	0.171	0.299	0.00238629	3	PI4K2A
4.9307e-07	-0.688849	0.227	0.356	0.00365216	3	PROS1
2.8428e-07	-0.693396	0.202	0.333	0.00210563	3	CPEB2
2.4343e-08	-0.719153	0.179	0.321	0.00018031	3	ATP2B1
2.3515e-14	-0.740633	0.492	0.682	1.7418e-10	3	HLA-DMB
3.6788e-18	-0.744514	0.604	0.806	2.7249e-14	3	AEBP1
2.1657e-11	-0.744587	0.338	0.523	1.6042e-07	3	NAMPT
3.2468e-11	-0.746312	0.258	0.443	2.4049e-07	3	CD55
3.8806e-07	-0.74834	0.152	0.273	0.00287433	3	BTN3A2
5.7484e-07	-0.755439	0.14	0.257	0.00425786	3	BRMS1
3.2357e-12	-0.763294	0.235	0.432	2.3967e-08	3	SURF4
5.5981e-08	-0.767401	0.144	0.276	0.00041465	3	UBE3C
2.0156e-09	-0.767429	0.258	0.421	1.4929e-05	3	PCED1A
4.2289e-09	-0.770047	0.24	0.391	3.1323e-05	3	SOX4
3.467e-10	-0.778571	0.235	0.408	2.568e-06	3	HLA-F
4.0843e-22	-0.781875	0.792	0.9	3.0252e-18	3	CIITA
6.1011e-07	-0.802438	0.146	0.262	0.00451909	3	IDS
1.2573e-09	-0.807943	0.206	0.364	9.3128e-06	3	HAGH
5.9003e-09	-0.809743	0.229	0.381	4.3704e-05	3	KYNU
1.0518e-09	-0.810722	0.225	0.384	7.7905e-06	3	IFITM1
1.4455e-08	-0.811824	0.194	0.336	0.00010707	3	ERRFI1
2.7306e-08	-0.817365	0.175	0.313	0.00020226	3	TUBB2A
1.5498e-11	-0.819069	0.333	0.512	1.1479e-07	3	SLC26A2
1.5974e-09	-0.829027	0.165	0.315	1.1832e-05	3	MYO1B
2.8114e-07	-0.829337	0.125	0.242	0.00208243	3	USP4
3.0429e-12	-0.833623	0.237	0.43	2.2539e-08	3	RNF182
4.0749e-15	-0.845341	0.287	0.508	3.0183e-11	3	APLP2
9.9173e-07	-0.845399	0.11	0.215	0.00734577	3	CYBC1
4.3486e-07	-0.865863	0.137	0.251	0.00322103	3	DNAJC1
3.025e-07	-0.88309	0.158	0.279	0.00224061	3	GBP2
2.1004e-08	-0.923349	0.125	0.254	0.00015557	3	NEK6
2.7206e-08	-0.937599	0.131	0.257	0.00020151	3	SGTA
4.211e-07	-0.943363	0.21	0.332	0.0031191	3	FOS
1.2367e-26	-0.948604	0.608	0.817	9.1605e-23	3	HLA-DOA
7.869e-08	-0.949057	0.11	0.227	0.00058286	3	DCTD
2.9043e-08	-0.950256	0.131	0.257	0.00021512	3	ODF2L
1.8014e-11	-0.951333	0.21	0.381	1.3343e-07	3	EHBP1
5.7501e-09	-0.956061	0.138	0.275	4.2591e-05	3	POLD4
6.4767e-20	-0.957011	0.544	0.761	4.7973e-16	3	WARS
8.443e-12	-0.98838	0.248	0.422	6.2537e-08	3	TAP1
1.7255e-08	-1.0158	0.108	0.231	0.00012781	3	PITRM1
1.9061e-07	-1.01981	0.115	0.227	0.00141188	3	TOMM5
2.2905e-07	-1.02472	0.1	0.207	0.00169661	3	MSTO1
5.0214e-15	-1.029	0.202	0.41	3.7193e-11	3	NPC1
8.3373e-13	-1.04095	0.221	0.402	6.1755e-09	3	AIF1L
1.2379e-07	-1.0499	0.071	0.173	0.0009169	3	TTC39C
2.1553e-11	-1.0545	0.156	0.321	1.5964e-07	3	LEF1
2.7645e-07	-1.07504	0.071	0.169	0.00204767	3	MTA3
4.3273e-08	-1.18574	0.077	0.185	0.00032053	3	ME2
1.0114e-06	-1.2029	0.063	0.152	0.00749173	3	PPHLN1
5.6537e-11	-1.22222	0.098	0.243	4.1877e-07	3	BCL3
8.4402e-19	-1.24409	0.317	0.535	6.2517e-15	3	FABP5
2.159e-14	-1.26808	0.171	0.359	1.5992e-10	3	HTRA1
1.9779e-07	-1.26993	0.05	0.14	0.00146504	3	GMDS
3.4855e-07	-1.29287	0.042	0.126	0.00258171	3	THEMIS2
1.0504e-14	-1.31682	0.165	0.357	7.7803e-11	3	FAM43A
6.4009e-07	-1.32397	0.058	0.145	0.00474112	3	MAPK12
4.1607e-07	-1.33845	0.071	0.165	0.00308185	3	COL8A1
4.4799e-08	-1.35685	0.065	0.167	0.00033182	3	EFNA1
7.134e-10	-1.38244	0.083	0.208	5.2841e-06	3	ITPRIPL2
1.1959e-11	-1.4288	0.067	0.204	8.8579e-08	3	ARL4C
6.3868e-20	-1.43234	0.244	0.471	4.7307e-16	3	CEBPD
3.0426e-07	-1.47528	0.044	0.129	0.00225369	3	SHB
2.4385e-15	-1.4885	0.096	0.276	1.8062e-11	3	ISG20
2.4722e-09	-1.49126	0.063	0.176	1.8311e-05	3	TNC
4.5485e-08	-1.60283	0.048	0.141	0.00033691	3	TMEM98
3.253e-14	-1.65436	0.108	0.276	2.4095e-10	3	SEMA4B
6.0117e-11	-1.66337	0.063	0.19	4.4529e-07	3	NNMT
7.334e-08	-1.67113	0.187	0.305	0.00054323	3	KRT10
2.91e-08	-1.70717	0.042	0.134	0.00021554	3	PALM
5.0012e-12	-1.72595	0.173	0.32	3.7044e-08	3	SERPINA3
3.2847e-11	-1.7834	0.042	0.161	2.433e-07	3	EPB41L3
4.1997e-07	-1.7834	0.037	0.114	0.00311074	3	IRF1
7.8245e-08	-2.0127	0.025	0.103	0.00057956	3	MDGA1
9.5134e-23	-2.49983	0.215	0.444	7.0466e-19	3	VGF
3.1001e-09	-2.87508	0.021	0.107	2.2962e-05	3	MMP1
2.7343e-09	-2.89421	0.035	0.13	2.0253e-05	3	KRTDAP
1.264e-12	-3.0462	0.14	0.292	9.3623e-09	3	S100A9
3.7399e-10	-3.08826	0.073	0.192	2.7702e-06	3	KRT5
2.2828e-12	-3.09458	0.1	0.242	1.6909e-08	3	KRT14
4.6708e-11	-3.14776	0.138	0.277	3.4597e-07	3	KRT16
2.4886e-13	-3.25175	0.144	0.3	1.8433e-09	3	S100A8
7.7619e-07	-3.33153	0.012	0.07	0.00574921	3	PI3
4.051e-09	-3.38044	0.012	0.089	3.0006e-05	3	SPRR2A
1.7668e-10	-3.40701	0.023	0.12	1.3086e-06	3	KRT6B
2.2612e-07	-3.49035	0.006	0.063	0.00167485	3	SPRR2D
1.1179e-07	-3.50697	0.012	0.077	0.00082801	3	AQP3
1.4713e-15	-3.65013	0.019	0.153	1.0898e-11	3	KRT1
1.5489e-08	-3.65594	0.006	0.072	0.00011472	3	SPRR2G
3.0719e-08	-3.86586	0.006	0.07	0.00022753	3	SBSN
1.5035e-12	-3.88294	0.012	0.116	1.1136e-08	3	S100A7
4.8709e-12	-4.57858	0.004	0.096	3.6079e-08	3	CSTA
1.0131e-10	1.85549	0.19	0.05	7.504e-07	4	TMEM171
8.8394e-09	1.6084	0.197	0.063	6.5473e-05	4	MTMR6
3.0567e-11	1.4159	0.286	0.096	2.2641e-07	4	JADE1
8.7647e-07	1.30064	0.211	0.083	0.00649204	4	RANBP17
2.2651e-07	1.29604	0.245	0.1	0.00167776	4	ITIH6
7.8002e-09	1.27069	0.272	0.104	5.7776e-05	4	FAM189A2
3.9169e-08	1.23843	0.286	0.12	0.00029013	4	CBR4
5.3931e-09	1.23763	0.286	0.111	3.9946e-05	4	AOPEP
4.7137e-07	1.2322	0.218	0.085	0.0034914	4	UXT
1.3274e-07	1.22866	0.245	0.097	0.00098324	4	MAGT1
2.1171e-07	1.21349	0.245	0.098	0.00156811	4	NRXN3
7.759e-07	1.21015	0.259	0.113	0.00574707	4	ABCA5
2.742e-08	1.20761	0.299	0.126	0.0002031	4	ADAMTS9
2.2753e-10	1.19853	0.395	0.174	1.6853e-06	4	PAQR8
7.2769e-09	1.1916	0.327	0.139	5.39e-05	4	ZBTB4
3.2154e-08	1.18913	0.299	0.127	0.00023816	4	EPS8
6.4178e-07	1.16743	0.231	0.094	0.00475364	4	BTF3L4
1.0324e-06	1.15946	0.224	0.091	0.00764718	4	CHPT1
8.5179e-11	1.15834	0.374	0.152	6.3092e-07	4	CDK16
7.3573e-09	1.15502	0.34	0.149	5.4495e-05	4	MOSMO
5.7686e-10	1.15396	0.388	0.171	4.2728e-06	4	AC015802.6
2.3873e-07	1.14871	0.286	0.126	0.00176829	4	DOCK4
8.7543e-07	1.1376	0.231	0.094	0.00648429	4	NIT1
1.6081e-07	1.12249	0.299	0.134	0.00119115	4	CLCN5
9.5275e-07	1.10667	0.224	0.09	0.00705705	4	GNPTAB
5.275e-09	1.10374	0.429	0.216	3.9072e-05	4	ABHD17C
3.3065e-07	1.09676	0.265	0.113	0.00244909	4	ZMYM5
1.3604e-08	1.08416	0.327	0.14	0.00010076	4	MBD6
5.1765e-07	1.07083	0.299	0.137	0.00383425	4	CHAF1A
1.7396e-07	1.07042	0.313	0.142	0.00128849	4	KIF13B
5.4998e-08	1.06869	0.374	0.182	0.00040737	4	ANO4
1.2516e-06	1.0636	0.333	0.17	0.00927032	4	DHX9
9.9513e-07	1.0636	0.286	0.132	0.00737095	4	MOB1B
2.8878e-12	1.06032	0.544	0.269	2.139e-08	4	METRN
1.2092e-06	1.04692	0.272	0.123	0.00895634	4	ARHGEF12
1.3164e-06	1.04567	0.259	0.113	0.00975061	4	OSBPL8
7.532e-07	1.03975	0.286	0.129	0.00557897	4	AMOTL2
3.3944e-07	1.03385	0.299	0.135	0.0025142	4	EGFL8
2.5018e-16	1.03349	0.721	0.376	1.8531e-12	4	TNFRSF19
2.3978e-07	1.03118	0.327	0.154	0.00177603	4	HIST1H2AC
3.9496e-07	1.03058	0.327	0.157	0.0029255	4	EBNA1BP2
2.9524e-07	1.0173	0.299	0.134	0.00218686	4	FOXJ3
3.7748e-07	1.0173	0.286	0.125	0.00279597	4	CNST
3.0556e-08	1.01673	0.347	0.156	0.00022633	4	LXN
7.524e-08	1.0022	0.381	0.19	0.0005573	4	TTC14
1.0813e-06	0.998305	0.32	0.155	0.00800955	4	LDLRAD3
6.0581e-07	0.991028	0.347	0.173	0.00448721	4	VEZF1
3.3167e-07	0.98905	0.367	0.187	0.00245667	4	TBC1D8
4.0739e-11	0.979765	0.558	0.286	3.0175e-07	4	HMCN1
3.5451e-07	0.974592	0.333	0.159	0.00262585	4	CHID1
1.6287e-08	0.958378	0.435	0.22	0.00012064	4	LZTS2
1.5977e-07	0.954662	0.327	0.149	0.00118344	4	ATPAF1
8.7701e-07	0.94812	0.354	0.179	0.00649602	4	EDEM3
1.8325e-07	0.94812	0.401	0.211	0.00135732	4	MPZ
7.8446e-09	0.938442	0.449	0.225	5.8105e-05	4	LSS
2.5876e-07	0.931147	0.333	0.155	0.00191666	4	SMYD2
1.1202e-07	0.926093	0.374	0.181	0.00082974	4	BLID
9.0229e-07	0.916755	0.347	0.172	0.00668323	4	CD58
1.1409e-07	0.912817	0.361	0.171	0.00084504	4	NOL7
2.752e-09	0.909974	0.49	0.252	2.0384e-05	4	SIPA1
2.4381e-07	0.909269	0.374	0.184	0.00180589	4	SEPTIN10
5.7747e-07	0.907478	0.395	0.208	0.00427731	4	ADAM10
1.0872e-07	0.907321	0.367	0.175	0.00080525	4	PAPOLA
4.9249e-09	0.903726	0.408	0.187	3.6479e-05	4	KMT2C
3.1088e-07	0.89076	0.34	0.161	0.00230267	4	DMAP1
3.0937e-07	0.882102	0.388	0.198	0.00229154	4	PYROXD2
8.1272e-07	0.882102	0.395	0.21	0.00601985	4	PHLPP1
7.021e-08	0.872733	0.435	0.225	0.00052004	4	POLR2I
3.7702e-07	0.864441	0.422	0.226	0.0027926	4	KIF5B
3.9017e-07	0.860155	0.503	0.31	0.00288997	4	CELF2
5.9286e-09	0.859505	0.531	0.292	4.3913e-05	4	AMD1
5.3956e-07	0.852345	0.388	0.2	0.00399651	4	RTCB
2.0295e-09	0.833031	0.51	0.256	1.5032e-05	4	UBE2V1
7.8033e-07	0.825192	0.395	0.206	0.00577989	4	OPHN1
3.4221e-08	0.822851	0.531	0.305	0.00025347	4	CAV1
5.5671e-11	0.818818	0.694	0.417	4.1235e-07	4	ID4
8.2067e-07	0.816875	0.388	0.2	0.0060787	4	POMGNT1
5.4686e-07	0.806209	0.395	0.203	0.00405061	4	KAT2B
2.8094e-07	0.788864	0.463	0.255	0.00208095	4	ITPRID2
7.5521e-09	0.787201	0.544	0.303	5.5938e-05	4	ANAPC5
2.8428e-09	0.782184	0.612	0.35	2.1057e-05	4	NAP1L4
6.458e-08	0.765176	0.524	0.295	0.00047834	4	ANP32B
1.0447e-09	0.756671	0.619	0.339	7.7381e-06	4	ERP29
4.2067e-07	0.754	0.503	0.292	0.00311588	4	EIF2S3
5.5429e-12	0.74307	0.796	0.486	4.1056e-08	4	UBE2E3
5.7543e-07	0.733891	0.442	0.238	0.00426224	4	PACS2
9.7077e-07	0.73268	0.408	0.213	0.00719052	4	FNDC3A
8.8445e-08	0.732188	0.51	0.279	0.00065511	4	TBC1D7
4.5168e-07	0.727994	0.531	0.311	0.00334563	4	NRP2
1.0151e-10	0.727848	0.769	0.473	7.5186e-07	4	MYO5A
3.1554e-08	0.726718	0.531	0.284	0.00023372	4	FCRLA
3.2678e-07	0.723622	0.585	0.383	0.00242048	4	NR4A2
9.7813e-08	0.720646	0.565	0.331	0.0007245	4	ATF4
4.2825e-07	0.720189	0.463	0.251	0.00317202	4	NDE1
2.7668e-07	0.714012	0.517	0.294	0.0020494	4	RNASEK
2.7249e-07	0.711921	0.531	0.306	0.00201836	4	38777
4.2375e-07	0.70437	0.483	0.266	0.00313873	4	PFKM
5.6682e-08	0.702306	0.537	0.298	0.00041984	4	FXR1
2.8392e-08	0.700381	0.633	0.369	0.0002103	4	KCNN4
1.0586e-08	0.689717	0.605	0.338	7.841e-05	4	USP53
4.7812e-08	0.683325	0.633	0.378	0.00035414	4	HNRNPD
1.8215e-07	0.683277	0.524	0.29	0.00134921	4	FREM2
3.1486e-07	0.67365	0.571	0.348	0.00233214	4	MICAL3
2.976e-07	0.66751	0.524	0.295	0.00220432	4	STT3B
1.672e-08	0.663576	0.714	0.452	0.00012384	4	SYNE2
1.2069e-08	0.662717	0.66	0.381	8.9395e-05	4	SNHG32
2.8417e-10	0.652341	0.803	0.5	2.1048e-06	4	SRSF5
5.0728e-08	0.645985	0.721	0.468	0.00037574	4	LAMB1
9.4427e-10	0.645453	0.755	0.457	6.9942e-06	4	SFPQ
1.1572e-06	0.633144	0.612	0.38	0.00857124	4	DHX15
1.2246e-06	0.632962	0.517	0.299	0.00907091	4	EIF3B
2.8628e-09	0.630297	0.728	0.444	2.1205e-05	4	CANX
2.1132e-10	0.628764	0.864	0.68	1.5653e-06	4	DDX39B
3.9334e-09	0.62784	0.83	0.557	2.9135e-05	4	COL5A3
1.1466e-06	0.618565	0.592	0.366	0.00849317	4	KLC1
1.8304e-07	0.61787	0.626	0.374	0.00135578	4	BIN3
5.5695e-07	0.614289	0.483	0.264	0.00412533	4	NDUFB2
8.1617e-08	0.614289	0.707	0.468	0.00060454	4	ACADVL
3.7812e-07	0.60827	0.626	0.386	0.00280073	4	RCAN3
7.6219e-07	0.598474	0.599	0.36	0.00564551	4	ABHD2
2.2782e-07	0.588817	0.707	0.465	0.00168744	4	CCNI
3.74e-08	0.572456	0.769	0.494	0.00027702	4	KHSRP
4.6737e-08	0.568967	0.735	0.468	0.00034618	4	HIST1H4E
7.3628e-12	0.534073	0.993	0.902	5.4537e-08	4	CDH19
3.4184e-08	0.529397	0.803	0.513	0.0002532	4	ATP5F1E
2.4106e-07	0.529203	0.714	0.457	0.00178555	4	ST6GALNAC2
1.2237e-12	0.5134	0.986	0.92	9.0642e-09	4	HNRNPA2B1
1.4589e-08	0.497944	0.905	0.771	0.00010806	4	ATP1A1
2.5834e-12	0.47647	0.986	0.936	1.9135e-08	4	PYGB
2.0851e-10	0.471217	0.959	0.932	1.5445e-06	4	SERPINE2
4.8678e-07	0.470402	0.816	0.586	0.00360557	4	HLA-DMB
3.8227e-16	0.465306	0.993	0.962	2.8315e-12	4	A2M
1.5928e-08	0.463139	0.925	0.809	0.00011798	4	FBXO7
1.825e-10	0.459871	0.952	0.923	1.3517e-06	4	EEF1G
6.3989e-07	0.450029	0.816	0.617	0.00473967	4	SLC20A1
7.3538e-09	0.427577	0.932	0.833	5.447e-05	4	CALR
1.9484e-08	0.397449	0.973	0.898	0.00014432	4	EIF4B
2.0095e-10	0.389241	0.986	0.959	1.4884e-06	4	ANXA1
6.9898e-09	0.366272	0.973	0.936	5.1773e-05	4	HSP90AB1
5.1378e-17	0.341725	1	0.998	3.8055e-13	4	HLA-DRA
1.6862e-08	0.330269	1	0.979	0.00012489	4	ITGA3
1.263e-07	0.318298	0.952	0.908	0.00093548	4	FTL
1.8456e-07	0.307336	0.986	0.982	0.00136704	4	PABPC1
1.893e-08	0.299983	0.993	0.989	0.00014021	4	HLA-DPA1
3.3717e-14	0.29668	1	0.999	2.4974e-10	4	VIM
3.3461e-07	0.27867	0.986	0.98	0.00247845	4	HLA-DPB1
1.5347e-08	0.274851	0.993	0.963	0.00011367	4	IFITM3
8.3609e-09	0.26058	1	0.997	6.1929e-05	4	S100B
1.0734e-07	-0.894548	0.456	0.648	0.0007951	4	COL3A1
2.129e-12	-1.25661	0.401	0.683	1.577e-08	4	COL1A2
1.7351e-16	4.94642	0.078	0.003	1.2852e-12	5	CXCL5
2.4742e-11	4.39003	0.057	0.003	1.8327e-07	5	CSF3
1.3886e-37	4.2639	0.24	0.021	1.0286e-33	5	FDCSP
2.0132e-12	4.20945	0.073	0.006	1.4912e-08	5	MMP3
2.3019e-17	3.98706	0.115	0.011	1.705e-13	5	IL1B
2.0099e-31	3.76694	0.276	0.042	1.4887e-27	5	MMP1
1.188e-07	3.76199	0.042	0.003	0.00087998	5	PI15
9.5877e-22	3.55523	0.167	0.02	7.1016e-18	5	UBD
2.4412e-27	3.55294	0.193	0.02	1.8082e-23	5	PLA2G2A
1.175e-100	3.34304	0.823	0.174	8.7046e-97	5	SERPINA3
9.2136e-25	3.13906	0.224	0.035	6.8245e-21	5	CCL2
6.0233e-16	3.1335	0.141	0.021	4.4615e-12	5	IL24
5.7208e-10	3.10992	0.094	0.016	4.2374e-06	5	IL6
3.1263e-16	3.00064	0.245	0.066	2.3157e-12	5	CXCL8
8.5937e-15	2.97813	0.115	0.014	6.3654e-11	5	VEGFC
5.1665e-56	2.94642	0.505	0.084	3.8268e-52	5	NNMT
2.9644e-13	2.92935	0.104	0.014	2.1957e-09	5	PTGER2
6.5292e-54	2.88514	0.474	0.073	4.8362e-50	5	COL8A1
2.6256e-08	2.80506	0.073	0.012	0.00019448	5	G0S2
2.492e-07	2.76199	0.078	0.016	0.00184582	5	MMP9
1.6088e-32	2.75942	0.281	0.04	1.1916e-28	5	MDGA1
1.7098e-08	2.73997	0.094	0.019	0.00012664	5	CHI3L1
1.1602e-65	2.70938	0.661	0.139	8.5935e-62	5	SEMA4B
9.3885e-65	2.69239	0.677	0.153	6.954e-61	5	ANGPTL4
5.5637e-18	2.68862	0.182	0.032	4.121e-14	5	FOSB
4.8381e-68	2.62449	0.641	0.115	3.5836e-64	5	BCL3
7.9167e-08	2.5541	0.083	0.017	0.00058639	5	TSPAN11
7.9466e-11	2.51346	0.115	0.022	5.886e-07	5	RGS16
2.4659e-25	2.51128	0.391	0.11	1.8265e-21	5	SOD2
3.8533e-08	2.47249	0.083	0.016	0.00028541	5	STC1
3.6896e-12	2.46099	0.125	0.023	2.7329e-08	5	SMIM3
6.3356e-83	2.40594	0.911	0.3	4.6928e-79	5	CEBPD
7.2909e-32	2.39622	0.333	0.06	5.4004e-28	5	TM4SF1
5.6293e-08	2.37656	0.078	0.014	0.00041697	5	PEG3
2.3213e-35	2.27273	0.474	0.119	1.7194e-31	5	VEGFA
4.6588e-14	2.26192	0.172	0.037	3.4508e-10	5	HLA-DOB
5.8612e-19	2.25145	0.25	0.058	4.3414e-15	5	IRF1
4.0716e-22	2.24389	0.26	0.053	3.0158e-18	5	NFIL3
3.5228e-59	2.22239	0.672	0.15	2.6093e-55	5	POLD4
1.149e-31	2.21817	0.391	0.086	8.5103e-28	5	EFNA1
7.6753e-11	2.18392	0.135	0.03	5.6851e-07	5	INPP5J
3.8241e-28	2.17573	0.349	0.076	2.8325e-24	5	NRXN3
1.0942e-26	2.16949	0.354	0.083	8.1048e-23	5	CCN5
5.4372e-13	2.16506	0.161	0.035	4.0274e-09	5	FOSL2
1.3042e-14	2.16152	0.188	0.042	9.6602e-11	5	TIAM1
1.3785e-23	2.14876	0.297	0.065	1.021e-19	5	MFAP3L
1.7537e-23	2.14644	0.276	0.056	1.299e-19	5	CTSO
7.9352e-42	2.14348	0.604	0.173	5.8776e-38	5	GBP2
3.0189e-19	2.12699	0.245	0.054	2.2361e-15	5	APOL6
8.0227e-14	2.12199	0.182	0.042	5.9424e-10	5	CDC7
2.2628e-23	2.06419	0.292	0.062	1.6761e-19	5	OSMR
3.246e-37	2.0529	0.646	0.227	2.4043e-33	5	FOS
3.5127e-28	2.03953	0.375	0.088	2.6018e-24	5	SOCS3
1.7292e-45	2.03175	0.661	0.193	1.2808e-41	5	LEF1
9.5486e-65	2.00807	0.901	0.38	7.0726e-61	5	FABP5
2.0929e-35	1.99782	0.5	0.128	1.5502e-31	5	KCNK3
3.9105e-32	1.99143	0.474	0.127	2.8965e-28	5	STAT1
4.9313e-17	1.98926	0.24	0.058	3.6526e-13	5	CLCF1
1.1442e-07	1.98706	0.12	0.034	0.00084748	5	CACNA2D1
3.3493e-48	1.97813	0.682	0.193	2.4808e-44	5	TUBB2A
7.0461e-08	1.97813	0.109	0.028	0.0005219	5	APLNR
2.5936e-44	1.96412	0.682	0.218	1.921e-40	5	ERRFI1
1.3534e-53	1.96128	0.802	0.288	1.0025e-49	5	TNFRSF21
2.0271e-13	1.9557	0.198	0.051	1.5015e-09	5	MYLK
4.2208e-51	1.95055	0.766	0.264	3.1264e-47	5	AIF1L
2.2036e-13	1.94989	0.208	0.056	1.6322e-09	5	IL32
1.4447e-41	1.94178	0.672	0.222	1.0701e-37	5	FAM43A
7.4152e-08	1.9386	0.115	0.03	0.00054925	5	RGS17
1.3488e-10	1.93483	0.156	0.041	9.9909e-07	5	GPRIN3
1.9529e-19	1.93147	0.286	0.073	1.4465e-15	5	CHST3
8.1865e-55	1.90848	0.833	0.307	6.0638e-51	5	JUNB
3.1368e-16	1.89935	0.245	0.063	2.3234e-12	5	CITED2
6.8165e-36	1.86929	0.604	0.196	5.049e-32	5	ENG
2.0783e-29	1.86747	0.453	0.122	1.5394e-25	5	PSMB9
4.6224e-07	1.8655	0.12	0.036	0.00342381	5	EDNRA
1.1e-25	1.8323	0.396	0.106	8.1475e-22	5	SLC35F6
1.3304e-15	1.82885	0.255	0.071	9.8542e-12	5	SHB
4.209e-36	1.82856	0.599	0.188	3.1176e-32	5	NRP1
2.2234e-27	1.82116	0.656	0.309	1.6468e-23	5	VGF
1.7923e-65	1.81126	0.974	0.631	1.3276e-61	5	WARS
1.2792e-08	1.77649	0.161	0.052	9.475e-05	5	PRSS23
2.1292e-08	1.77649	0.146	0.044	0.00015771	5	IDH2
7.7715e-17	1.76535	0.323	0.103	5.7564e-13	5	TNC
3.9773e-25	1.74875	0.448	0.139	2.946e-21	5	SESN3
1.3975e-43	1.74517	0.75	0.28	1.0351e-39	5	AHR
5.1507e-22	1.74068	0.385	0.115	3.8151e-18	5	ARL4C
2.5918e-12	1.72967	0.234	0.073	1.9197e-08	5	IFIT3
2.2292e-37	1.72022	0.734	0.295	1.6512e-33	5	TAP1
4.2645e-09	1.71469	0.161	0.049	3.1587e-05	5	NETO2
4.9096e-14	1.70856	0.25	0.074	3.6365e-10	5	LOXL2
1.9344e-31	1.69439	0.578	0.191	1.4328e-27	5	PTEN
3.056e-20	1.69072	0.354	0.103	2.2635e-16	5	JUN
8.0114e-34	1.6776	0.62	0.21	5.934e-30	5	ATP2B1
1.0449e-07	1.67512	0.135	0.041	0.00077397	5	CTSL
3.9098e-40	1.67141	0.812	0.384	2.896e-36	5	SLC26A2
5.6871e-14	1.67129	0.24	0.068	4.2124e-10	5	TLN2
3.2371e-08	1.67029	0.151	0.047	0.00023977	5	CITED1
4.783e-18	1.65251	0.344	0.108	3.5428e-14	5	VASN
1.4071e-39	1.64227	0.766	0.304	1.0423e-35	5	B4GALT5
5.9428e-37	1.64185	0.708	0.262	4.4018e-33	5	IFITM1
2.3687e-14	1.63743	0.26	0.078	1.7545e-10	5	GLDC
1.9464e-29	1.63214	0.615	0.236	1.4417e-25	5	THBS1
1.4718e-07	1.62449	0.151	0.051	0.00109014	5	PARP14
2.2191e-07	1.62449	0.141	0.046	0.00164368	5	COL5A1
1.4888e-21	1.62449	0.406	0.128	1.1027e-17	5	DEGS1
8.9912e-77	1.61944	1	0.96	6.6598e-73	5	IFITM3
1.6903e-20	1.60611	0.375	0.113	1.252e-16	5	CD47
7.1273e-26	1.60383	0.474	0.146	5.2792e-22	5	ANKH
2.1022e-23	1.60343	0.443	0.139	1.5571e-19	5	BCL6
3.1209e-15	1.60024	0.286	0.088	2.3117e-11	5	SQLE
2.7119e-20	1.60011	0.401	0.13	2.0087e-16	5	IMPA2
1.9157e-11	1.59701	0.234	0.078	1.419e-07	5	MAP1B
1.3256e-16	1.59474	0.333	0.109	9.8189e-13	5	CIB1
9.1508e-18	1.5939	0.323	0.095	6.778e-14	5	PCDH9
5.4131e-10	1.58602	0.188	0.058	4.0095e-06	5	MGLL
1.3687e-12	1.5782	0.229	0.068	1.0138e-08	5	EDIL3
4.3898e-26	1.57679	0.505	0.166	3.2515e-22	5	TNFRSF1A
8.4569e-07	1.57202	0.135	0.046	0.006264	5	SEC24A
2.9422e-07	1.55173	0.146	0.049	0.00217929	5	MSMO1
4.2421e-18	1.54753	0.469	0.2	3.1421e-14	5	DYNLT3
2.9613e-13	1.54649	0.37	0.156	2.1934e-09	5	TIMP3
3.1903e-44	1.54155	0.859	0.388	2.3631e-40	5	SELENON
2.4666e-17	1.53932	0.344	0.11	1.827e-13	5	UGP2
1.4409e-39	1.5373	0.812	0.37	1.0673e-35	5	SCD
4.5884e-28	1.53291	0.651	0.27	3.3986e-24	5	KYNU
6.4327e-23	1.52809	0.5	0.181	4.7647e-19	5	LYPD1
1.3017e-09	1.52295	0.214	0.075	9.6415e-06	5	THEMIS2
4.5808e-10	1.52015	0.198	0.063	3.393e-06	5	LAMA5
5.4571e-12	1.51643	0.229	0.071	4.0421e-08	5	TPMT
5.4435e-19	1.50901	0.359	0.11	4.032e-15	5	RETREG1
7.0561e-07	1.50901	0.151	0.054	0.00522646	5	SLC35C1
8.6536e-07	1.50519	0.146	0.052	0.00640971	5	THUMPD3
1.9289e-09	1.50374	0.245	0.095	1.4287e-05	5	IFI44
2.7555e-18	1.50348	0.37	0.12	2.041e-14	5	SLAIN1
6.9256e-56	1.50121	0.938	0.66	5.1298e-52	5	IFITM2
8.8417e-18	1.5005	0.365	0.119	6.549e-14	5	NFKBIA
5.8111e-09	1.49896	0.203	0.073	4.3043e-05	5	SECISBP2L
7.2496e-08	1.49896	0.167	0.057	0.00053698	5	TPST1
3.7589e-28	1.49344	0.615	0.23	2.7842e-24	5	CPEB2
1.9454e-32	1.48908	0.682	0.259	1.4409e-28	5	IL6ST
2.7725e-11	1.48401	0.219	0.068	2.0536e-07	5	KLF10
7.6736e-09	1.4801	0.182	0.061	5.6839e-05	5	TP53INP2
4.9792e-14	1.47249	0.302	0.102	3.6881e-10	5	CNTNAP1
1.1068e-13	1.46961	0.328	0.122	8.1979e-10	5	UBE2L6
1.4399e-21	1.46837	0.521	0.209	1.0665e-17	5	PSMB8
2.7459e-20	1.46695	0.427	0.143	2.0339e-16	5	SLC2A3
7.8726e-27	1.46355	0.615	0.24	5.8313e-23	5	RHOBTB3
9.6149e-22	1.4603	0.484	0.174	7.1218e-18	5	PML
1.9531e-42	1.45743	0.901	0.563	1.4466e-38	5	HLA-DMB
1.2882e-12	1.45143	0.26	0.085	9.5419e-09	5	GPR155
5.282e-10	1.44392	0.224	0.079	3.9124e-06	5	PTPRE
5.8498e-08	1.44007	0.167	0.057	0.00043329	5	KAT6B
6.882e-28	1.43887	0.661	0.281	5.0975e-24	5	SOX4
2.1217e-21	1.43185	0.448	0.149	1.5716e-17	5	PCDH1
6.2864e-36	1.43152	0.875	0.6	4.6563e-32	5	SLC20A1
1.6779e-10	1.42809	0.229	0.079	1.2428e-06	5	RNF19B
2.4096e-21	1.42626	0.51	0.197	1.7848e-17	5	LAMP2
6.8985e-09	1.4214	0.198	0.069	5.1097e-05	5	OAS2
1.2294e-08	1.41938	0.182	0.062	9.1059e-05	5	SERPINB1
3.723e-28	1.4165	0.667	0.277	2.7576e-24	5	NPC1
1.022e-09	1.4109	0.219	0.077	7.57e-06	5	TMEM140
8.1978e-07	1.4021	0.151	0.054	0.0060721	5	SETBP1
2.8547e-31	1.40012	0.802	0.397	2.1145e-27	5	NAMPT
5.585e-25	1.39855	0.625	0.259	4.1368e-21	5	FCRLA
3.3195e-59	1.3969	0.995	0.96	2.4587e-55	5	A2M
8.2758e-08	1.38502	0.177	0.063	0.00061299	5	PELI2
1.1942e-20	1.38234	0.531	0.222	8.8453e-17	5	CYGB
4.6898e-09	1.38057	0.193	0.065	3.4737e-05	5	CD109
8.9803e-09	1.38057	0.193	0.067	6.6517e-05	5	RRAS2
1.3596e-15	1.38025	0.417	0.168	1.0071e-11	5	TFPI2
4.6054e-28	1.3772	0.719	0.331	3.4112e-24	5	SEMA6B
9.7577e-16	1.37257	0.37	0.133	7.2276e-12	5	SH3RF1
8.4572e-24	1.37107	0.557	0.21	6.2643e-20	5	MYO1B
7.426e-09	1.37073	0.198	0.069	5.5005e-05	5	MIGA1
9.5451e-08	1.3651	0.167	0.057	0.00070701	5	CYP51A1
2.1026e-09	1.36426	0.214	0.075	1.5574e-05	5	RIOX2
1.6337e-20	1.36146	0.526	0.211	1.2101e-16	5	IL1RAP
9.8936e-43	1.35927	0.896	0.565	7.3282e-39	5	APP
2.3424e-20	1.35376	0.479	0.176	1.735e-16	5	DDR1
2.421e-22	1.35191	0.505	0.177	1.7932e-18	5	SLC30A1
1.273e-13	1.34797	0.339	0.127	9.4287e-10	5	SDC2
2.3741e-07	1.34696	0.167	0.06	0.00175849	5	PPP2R3A
3.4158e-09	1.3407	0.229	0.086	2.5301e-05	5	TMEM131
2.3871e-16	1.33945	0.432	0.171	1.7682e-12	5	ISG20
1.4372e-09	1.33819	0.208	0.071	1.0645e-05	5	ANGPT1
1.2481e-18	1.33434	0.453	0.168	9.2446e-15	5	INSIG1
1.0572e-09	1.33004	0.255	0.1	7.831e-06	5	UBASH3B
9.3421e-12	1.32493	0.297	0.111	6.9197e-08	5	SSR3
3.0431e-27	1.32396	0.729	0.35	2.254e-23	5	MVP
8.7577e-07	1.31964	0.167	0.063	0.00648685	5	COQ10B
2.8804e-31	1.31896	0.828	0.459	2.1335e-27	5	GPNMB
6.5186e-18	1.31415	0.438	0.162	4.8284e-14	5	ITGB3
1.7742e-11	1.31255	0.286	0.106	1.3141e-07	5	HYOU1
1.0563e-10	1.30763	0.281	0.109	7.8238e-07	5	IST1
9.1142e-08	1.30256	0.193	0.073	0.00067509	5	RGS3
5.183e-07	1.30256	0.172	0.065	0.00383908	5	HYAL2
6.6384e-12	1.30256	0.292	0.106	4.9171e-08	5	ZFP36
1.1658e-37	1.29985	0.948	0.694	8.6349e-34	5	AEBP1
1.3217e-22	1.29509	0.599	0.253	9.7902e-19	5	SNED1
2.9986e-12	1.29479	0.328	0.129	2.2211e-08	5	GPC1
8.6793e-20	1.29328	0.521	0.213	6.4288e-16	5	SH3GLB1
7.7904e-19	1.29192	0.474	0.18	5.7703e-15	5	TJP1
5.7497e-18	1.28806	0.453	0.172	4.2588e-14	5	IRF9
5.8494e-07	1.28662	0.182	0.072	0.00433264	5	MICAL2
2.1021e-28	1.28642	0.75	0.351	1.557e-24	5	SPTSSA
1.7665e-10	1.28632	0.266	0.1	1.3084e-06	5	NGEF
1.4026e-11	1.28407	0.307	0.119	1.0389e-07	5	DHCR7
3.3577e-13	1.28293	0.333	0.125	2.487e-09	5	NARF
3.4396e-14	1.27872	0.349	0.127	2.5477e-10	5	HIPK3
8.8296e-12	1.27576	0.312	0.121	6.5401e-08	5	KLF13
6.0646e-61	1.2734	0.995	0.837	4.4921e-57	5	CIITA
9.6562e-08	1.27219	0.219	0.09	0.00071524	5	SEMA3A
6.5656e-10	1.26835	0.25	0.094	4.8631e-06	5	SMOX
1.845e-09	1.26835	0.25	0.097	1.3666e-05	5	RANBP9
8.8523e-21	1.26835	0.542	0.214	6.5569e-17	5	DLC1
7.8957e-18	1.2681	0.438	0.161	5.8483e-14	5	RHBDD2
1.9791e-24	1.26787	0.667	0.29	1.4659e-20	5	HLA-F
3.05e-11	1.26192	0.276	0.101	2.2591e-07	5	ARSB
7.5447e-07	1.26192	0.172	0.066	0.00558837	5	EBP
8.4129e-13	1.25854	0.339	0.131	6.2314e-09	5	RNF144A
8.8789e-20	1.25602	0.521	0.205	6.5766e-16	5	HSP90B1
1.6338e-14	1.25595	0.344	0.122	1.2102e-10	5	SEC14L2
1.872e-11	1.25145	0.297	0.113	1.3866e-07	5	GNB4
3.8488e-07	1.24898	0.188	0.073	0.00285079	5	SMIM15
4.3745e-15	1.24879	0.385	0.144	3.2402e-11	5	MDFIC
2.8806e-09	1.24598	0.245	0.095	2.1337e-05	5	CCSAP
1.3612e-07	1.24598	0.198	0.077	0.00100825	5	PPP2R5E
2.2886e-07	1.23963	0.385	0.227	0.00169519	5	COL4A1
1.3761e-15	1.23843	0.411	0.159	1.0193e-11	5	RAB34
1.0741e-09	1.23747	0.26	0.101	7.956e-06	5	BHLHE40
5.9728e-31	1.23066	0.844	0.429	4.4241e-27	5	CLIC4
2.5524e-17	1.22963	0.495	0.205	1.8906e-13	5	HSPA1B
7.6066e-15	1.22545	0.438	0.183	5.6342e-11	5	PLP1
2.3789e-19	1.22431	0.536	0.221	1.7621e-15	5	TAP2
6.9018e-22	1.22411	0.578	0.229	5.1122e-18	5	ETV6
7.1605e-21	1.22356	0.625	0.285	5.3038e-17	5	SFT2D2
1.3112e-35	1.22343	0.901	0.495	9.7123e-32	5	UBB
5.3818e-08	1.22153	0.224	0.09	0.00039863	5	MYO1E
6.1021e-13	1.22059	0.318	0.115	4.5198e-09	5	MVK
3.7608e-12	1.21965	0.339	0.135	2.7857e-08	5	TGFBR1
9.4592e-67	1.21531	1	0.987	7.0064e-63	5	B2M
5.4801e-11	1.21236	0.302	0.119	4.0591e-07	5	TXNIP
8.0991e-19	1.20643	0.526	0.217	5.999e-15	5	TXNDC5
2.2553e-16	1.20589	0.458	0.185	1.6705e-12	5	DNAJA1
3.4468e-08	1.20554	0.229	0.092	0.00025531	5	ABCA3
2.7058e-21	1.20335	0.693	0.352	2.0042e-17	5	IFI27
2.0686e-28	1.20273	0.823	0.445	1.5322e-24	5	HPCAL1
1.2822e-12	1.20253	0.365	0.149	9.4969e-09	5	FNIP2
2.5454e-29	1.20199	0.797	0.369	1.8854e-25	5	TMED10
1.9857e-24	1.20128	0.698	0.316	1.4708e-20	5	TSPAN3
1.5231e-09	1.20089	0.286	0.12	1.1282e-05	5	TEAD4
1.83e-30	1.19832	0.849	0.465	1.3555e-26	5	CD9
4.2377e-07	1.19663	0.203	0.084	0.00313886	5	STX1A
2.3787e-11	1.19153	0.328	0.133	1.7619e-07	5	RPGR
1.5473e-12	1.18879	0.354	0.142	1.1461e-08	5	SEPTIN7
1.6703e-07	1.18763	0.208	0.084	0.00123717	5	NUMBL
9.6572e-19	1.18255	0.609	0.292	7.1531e-15	5	SPTBN1
4.757e-09	1.18249	0.26	0.106	3.5235e-05	5	ZNRF1
1.6901e-07	1.18197	0.198	0.077	0.00125187	5	PPP2R1B
2.4601e-12	1.18155	0.323	0.122	1.8222e-08	5	AKIRIN1
7.0378e-07	1.17971	0.182	0.072	0.00521287	5	CRTC3
1.5147e-07	1.17908	0.229	0.097	0.00112196	5	TINF2
3.4914e-15	1.17661	0.479	0.211	2.5861e-11	5	B4GALT1
1.5064e-25	1.17648	0.708	0.301	1.1158e-21	5	SURF4
2.2045e-18	1.17257	0.562	0.248	1.6329e-14	5	CLTC
2.9043e-10	1.1725	0.271	0.103	2.1512e-06	5	FADS1
1.8696e-12	1.16993	0.37	0.153	1.3848e-08	5	ANKRD28
2.344e-10	1.1693	0.292	0.117	1.7362e-06	5	VAMP5
2.9461e-07	1.16506	0.203	0.082	0.0021822	5	ARL8A
1.1464e-09	1.16239	0.25	0.094	8.4917e-06	5	PLAT
6.1833e-13	1.16132	0.354	0.137	4.58e-09	5	HLA-A
5.9374e-07	1.15883	0.208	0.088	0.00439787	5	VPS16
2.7264e-09	1.15792	0.266	0.107	2.0195e-05	5	NOTCH2
2.2435e-09	1.15689	0.302	0.132	1.6618e-05	5	DDAH2
4.0001e-10	1.15572	0.286	0.114	2.9628e-06	5	ABCE1
2.539e-13	1.15417	0.422	0.183	1.8806e-09	5	NFE2L2
8.9887e-68	1.15357	1	0.964	6.6579e-64	5	FTH1
7.562e-07	1.14915	0.208	0.089	0.00560118	5	TNFAIP1
3.6204e-08	1.14805	0.229	0.092	0.00026816	5	SERTAD3
1.6569e-08	1.14768	0.281	0.125	0.00012272	5	GDE1
8.3545e-07	1.1445	0.193	0.079	0.00618814	5	CAB39
8.0775e-14	1.14336	0.427	0.184	5.983e-10	5	N4BP2L2
3.945e-12	1.14022	0.396	0.174	2.9221e-08	5	NEK6
8.691e-20	1.13906	0.661	0.326	6.4374e-16	5	CD55
4.7469e-11	1.13906	0.38	0.172	3.5161e-07	5	SLK
4.3264e-09	1.13906	0.271	0.111	3.2046e-05	5	DTX3L
8.1445e-07	1.13906	0.198	0.082	0.00603263	5	NLGN2
4.4481e-30	1.13856	0.906	0.558	3.2947e-26	5	EMP1
1.4799e-20	1.13838	0.615	0.271	1.0962e-16	5	KTN1
1.8882e-09	1.13761	0.323	0.146	1.3986e-05	5	C19orf12
1.0954e-09	1.13534	0.359	0.173	8.1137e-06	5	G6PD
4.5232e-20	1.13511	0.609	0.269	3.3503e-16	5	EHBP1
5.5387e-08	1.12973	0.219	0.086	0.00041025	5	UBE2K
5.756e-08	1.1288	0.245	0.104	0.00042635	5	SPPL2A
1.7145e-11	1.12781	0.349	0.144	1.2699e-07	5	DNAJC3
7.8607e-13	1.12539	0.5	0.257	5.8225e-09	5	PLSCR1
2.2181e-14	1.12442	0.453	0.194	1.643e-10	5	HIF1A
4.7584e-10	1.12319	0.339	0.15	3.5245e-06	5	LXN
1.2089e-18	1.11786	0.615	0.288	8.954e-15	5	CAPRIN1
9.9271e-09	1.11615	0.281	0.122	7.353e-05	5	ME2
1.6401e-15	1.11513	0.484	0.211	1.2148e-11	5	37316
2.3415e-09	1.11482	0.292	0.123	1.7343e-05	5	GSR
1.0828e-20	1.11478	0.714	0.372	8.0206e-17	5	EFTUD2
9.1111e-17	1.111	0.625	0.323	6.7486e-13	5	ICAM1
3.3802e-12	1.10587	0.401	0.175	2.5037e-08	5	UBE2H
3.8548e-17	1.10566	0.63	0.325	2.8552e-13	5	ARRDC3
2.7927e-62	1.10292	1	0.978	2.0685e-58	5	HLA-DPB1
4.9224e-20	1.10178	0.703	0.367	3.646e-16	5	PTTG1IP
4.2281e-56	1.10157	0.99	0.909	3.1317e-52	5	HLA-E
3.8351e-10	1.09877	0.292	0.117	2.8407e-06	5	LMO4
3.5054e-09	1.09774	0.297	0.128	2.5964e-05	5	CHAMP1
5.3926e-09	1.09311	0.292	0.127	3.9943e-05	5	RAB35
5.435e-09	1.092	0.281	0.119	4.0257e-05	5	ACOT2
5.4563e-29	1.09148	0.896	0.535	4.0414e-25	5	COL5A3
5.7821e-09	1.09067	0.318	0.146	4.2828e-05	5	PCDHGA7
1.2365e-17	1.09045	0.615	0.308	9.1591e-14	5	DNAJB1
9.8108e-08	1.08928	0.276	0.128	0.00072668	5	STK32A
2.5939e-18	1.08844	0.609	0.288	1.9213e-14	5	SBNO2
8.1813e-08	1.08392	0.266	0.119	0.00060599	5	LANCL1
3.4351e-07	1.08392	0.224	0.095	0.00254435	5	OTUD1
1.1191e-06	1.08105	0.229	0.104	0.00828913	5	TCTN1
3.1594e-19	1.0804	0.672	0.335	2.3402e-15	5	UBALD2
2.8313e-10	1.078	0.354	0.159	2.0972e-06	5	ANXA7
2.752e-10	1.077	0.318	0.132	2.0384e-06	5	HEXIM1
6.8464e-13	1.07652	0.391	0.16	5.0711e-09	5	TCEAL9
6.3094e-12	1.07587	0.339	0.133	4.6733e-08	5	LIMS1
1.9353e-13	1.07461	0.479	0.226	1.4335e-09	5	MYL12A
6.3884e-08	1.07251	0.281	0.129	0.00047319	5	AGAP1
1.7247e-09	1.06768	0.323	0.144	1.2775e-05	5	ZNF609
1.7851e-11	1.06576	0.365	0.155	1.3222e-07	5	DPYD
3.5032e-09	1.06378	0.297	0.128	2.5948e-05	5	SEL1L
5.9094e-15	1.06261	0.479	0.207	4.3771e-11	5	RABAC1
1.9064e-15	1.06099	0.573	0.288	1.4121e-11	5	SCARB2
5.4625e-09	1.05565	0.297	0.129	4.0461e-05	5	PAFAH1B3
1.1389e-10	1.05258	0.354	0.155	8.4361e-07	5	ITGA5
5.6847e-23	1.0504	0.75	0.378	4.2106e-19	5	KCTD3
1.8433e-07	1.0498	0.234	0.1	0.00136531	5	AFF1
2.1513e-07	1.04958	0.24	0.104	0.00159345	5	PSMD9
1.4498e-14	1.04899	0.479	0.209	1.0739e-10	5	ERO1A
1.2731e-10	1.04579	0.365	0.161	9.4297e-07	5	BTN3A3
1.306e-26	1.04107	0.865	0.485	9.6733e-23	5	GPX4
9.0238e-10	1.03953	0.339	0.151	6.6839e-06	5	SCAMP2
3.6858e-09	1.03953	0.339	0.158	2.7301e-05	5	IRF2BPL
1.4619e-08	1.03953	0.297	0.133	0.00010829	5	PDK3
1.4579e-28	1.0349	0.891	0.614	1.0799e-24	5	GAS7
4.9896e-08	1.03097	0.281	0.127	0.00036958	5	PSMD6
3.0599e-07	1.03013	0.25	0.112	0.00226649	5	SLC12A2
2.7525e-07	1.02954	0.24	0.105	0.00203879	5	IER5L
1.4396e-11	1.02812	0.396	0.174	1.0663e-07	5	PLEKHB2
6.9417e-17	1.02693	0.604	0.285	5.1417e-13	5	FAM89B
1.3234e-12	1.02488	0.448	0.205	9.8025e-09	5	PPP1CB
5.1702e-08	1.02481	0.302	0.142	0.00038296	5	NPLOC4
1.6302e-08	1.02434	0.297	0.133	0.00012075	5	HS2ST1
3.5717e-12	1.02426	0.438	0.2	2.6455e-08	5	RNF157
1.5132e-09	1.02385	0.302	0.127	1.1209e-05	5	MPRIP
1.8045e-33	1.02376	0.979	0.902	1.3366e-29	5	FTL
7.4587e-08	1.02149	0.26	0.113	0.00055247	5	ANKRD13A
7.1334e-10	1.01847	0.323	0.138	5.2837e-06	5	AFF4
4.5514e-26	1.01845	0.875	0.568	3.3712e-22	5	ANXA2
2.1415e-07	1.01815	0.307	0.154	0.00158621	5	CYFIP1
1.4993e-13	1.01592	0.469	0.209	1.1105e-09	5	TMBIM1
1.3357e-15	1.01568	0.573	0.276	9.8933e-12	5	RNASEK
2.0123e-08	1.01568	0.286	0.126	0.00014905	5	NIPA2
1.1182e-07	1.01353	0.271	0.122	0.00082825	5	NUP153
7.7949e-23	1.01168	0.828	0.508	5.7737e-19	5	CAPNS1
1.684e-15	1.01133	0.578	0.282	1.2474e-11	5	CBX3
3.9443e-19	1.0108	0.729	0.395	2.9215e-15	5	ARL6IP5
1.8769e-09	1.00978	0.365	0.173	1.3902e-05	5	BSCL2
7.7074e-13	1.00528	0.474	0.224	5.7089e-09	5	SNTB1
4.153e-08	1.00509	0.323	0.157	0.00030761	5	SPCS1
2.6152e-07	1.00368	0.266	0.122	0.00193706	5	CHIC2
4.1383e-08	1.003	0.307	0.144	0.00030652	5	SLFN5
3.6287e-59	1.00277	1	0.988	2.6878e-55	5	HLA-DPA1
3.6734e-08	1.00244	0.297	0.136	0.00027209	5	SGCB
7.3372e-07	1.00156	0.245	0.112	0.00543467	5	SH3BP4
2.3908e-15	0.999562	0.625	0.332	1.7709e-11	5	ST5
1.8213e-10	0.999171	0.417	0.199	1.349e-06	5	SEC61A1
2.1382e-10	0.998557	0.375	0.171	1.5838e-06	5	MBNL1
1.6845e-13	0.997859	0.438	0.182	1.2477e-09	5	ALKBH5
1.5876e-09	0.997093	0.333	0.148	1.176e-05	5	ATF2
2.346e-15	0.995551	0.578	0.281	1.7377e-11	5	GPR137B
2.0356e-08	0.995134	0.312	0.144	0.00015078	5	ATF6
8.2367e-09	0.992878	0.328	0.153	6.1009e-05	5	SNTB2
1.2247e-12	0.992223	0.438	0.193	9.0711e-09	5	BTN3A2
5.4231e-07	0.991273	0.245	0.111	0.00401691	5	USO1
1.2992e-06	0.991273	0.24	0.111	0.00962326	5	TRIP10
6.4012e-07	0.990285	0.234	0.104	0.00474138	5	PANK3
8.6685e-10	0.989775	0.359	0.165	6.4207e-06	5	HBP1
5.732e-08	0.989123	0.333	0.166	0.00042457	5	RALA
2.5413e-08	0.987866	0.302	0.138	0.00018824	5	TSC22D4
1.1696e-19	0.987272	0.766	0.419	8.6633e-16	5	RAB13
9.6811e-10	0.985757	0.359	0.166	7.1708e-06	5	UBE2B
1.4611e-24	0.985285	0.917	0.627	1.0822e-20	5	CTSB
1.0741e-06	0.982945	0.245	0.113	0.00795578	5	RETREG3
1.6799e-17	0.982626	0.656	0.326	1.2443e-13	5	STAT3
9.5275e-19	0.982538	0.682	0.337	7.057e-15	5	ABHD2
3.0135e-09	0.982384	0.328	0.147	2.2321e-05	5	TSC22D1
3.1499e-16	0.982195	0.594	0.282	2.3331e-12	5	PLXNA1
9.6839e-07	0.981647	0.266	0.129	0.00717285	5	IMPAD1
1.4156e-16	0.980993	0.625	0.307	1.0485e-12	5	VCP
1.6399e-07	0.980635	0.271	0.123	0.00121467	5	ANXA6
5.9952e-12	0.978388	0.552	0.303	4.4407e-08	5	SLC39A6
1.3206e-08	0.977799	0.307	0.139	9.7816e-05	5	AMFR
1.9126e-13	0.977064	0.49	0.225	1.4166e-09	5	CLIP1
9.6517e-09	0.976793	0.302	0.133	7.149e-05	5	SEC23A
2.8886e-09	0.976335	0.318	0.139	2.1396e-05	5	PSMA3
2.7769e-70	0.976221	1	0.997	2.0568e-66	5	HLA-DRA
4.5163e-17	0.976103	0.667	0.335	3.3452e-13	5	PSME1
4.2573e-10	0.974237	0.344	0.15	3.1534e-06	5	MEA1
2.6274e-16	0.974005	0.635	0.314	1.9461e-12	5	SPATA13
6.8432e-10	0.970816	0.38	0.179	5.0688e-06	5	PCBP4
4.1203e-09	0.970816	0.37	0.181	3.0519e-05	5	MBD2
6.8502e-14	0.970816	0.526	0.249	5.0739e-10	5	SPTAN1
2.6685e-11	0.967793	0.401	0.178	1.9766e-07	5	TACC1
7.6114e-07	0.964628	0.562	0.407	0.00563775	5	TMSB4X
7.0316e-09	0.961526	0.302	0.132	5.2083e-05	5	ATG9A
6.0417e-09	0.957427	0.349	0.166	4.4751e-05	5	UBE2Z
1.289e-08	0.957427	0.349	0.169	9.5476e-05	5	ITPR2
3.8917e-12	0.957314	0.474	0.226	2.8825e-08	5	MANF
1.5158e-08	0.954639	0.349	0.171	0.00011228	5	PAPOLA
9.0301e-14	0.951301	0.573	0.285	6.6886e-10	5	IDI1
8.3491e-12	0.949682	0.401	0.174	6.1842e-08	5	MAP3K6
9.7764e-19	0.949142	0.74	0.419	7.2414e-15	5	ZFAND5
9.5836e-07	0.946419	0.25	0.116	0.00709858	5	TMEM87B
9.5757e-12	0.945552	0.464	0.221	7.0927e-08	5	TMEM173
2.8438e-09	0.945406	0.396	0.198	2.1064e-05	5	PMP22
5.9806e-14	0.945064	0.552	0.268	4.4298e-10	5	PROS1
2.085e-29	0.941358	0.943	0.828	1.5444e-25	5	CALR
8.3682e-08	0.939993	0.349	0.179	0.00061983	5	ANO4
8.5423e-07	0.937278	0.281	0.139	0.00632731	5	IFI27L2
7.4915e-09	0.93578	0.365	0.177	5.5489e-05	5	HACD3
2.9764e-14	0.931469	0.698	0.421	2.2046e-10	5	DAG1
4.1218e-10	0.931067	0.453	0.236	3.053e-06	5	LAP3
1.4246e-08	0.929345	0.375	0.19	0.00010552	5	SEPTIN9
8.9935e-18	0.926723	0.781	0.476	6.6615e-14	5	UBE2E3
7.9163e-09	0.926634	0.385	0.193	5.8636e-05	5	ITGAV
9.7213e-18	0.925759	0.703	0.353	7.2006e-14	5	PLP2
6.8435e-13	0.92566	0.557	0.28	5.069e-09	5	ANP32B
6.1826e-10	0.925357	0.396	0.188	4.5795e-06	5	TANC1
1.0156e-06	0.924051	0.271	0.131	0.00752261	5	TEAD2
1.9948e-14	0.922362	0.667	0.377	1.4776e-10	5	MAGED1
3.5426e-10	0.921587	0.422	0.205	2.624e-06	5	KLHDC3
1.8914e-09	0.921208	0.375	0.178	1.4009e-05	5	ZFAND6
1.3606e-10	0.921055	0.521	0.291	1.0078e-06	5	TGFBI
5.7614e-09	0.921055	0.354	0.167	4.2675e-05	5	ICMT
1.674e-07	0.920692	0.318	0.157	0.00123994	5	SLC25A11
1.0763e-19	0.920294	0.776	0.426	7.9721e-16	5	CANX
2.5479e-07	0.916146	0.281	0.132	0.00188725	5	NUDT21
3.9439e-11	0.913619	0.469	0.232	2.9213e-07	5	KXD1
2.901e-08	0.910245	0.318	0.148	0.00021488	5	TRAM2
7.2883e-10	0.9075	0.375	0.171	5.3984e-06	5	PSMD1
1.9784e-10	0.906773	0.391	0.178	1.4654e-06	5	SELENOK
2.7488e-10	0.906773	0.401	0.187	2.036e-06	5	GPAT4
1.8489e-23	0.906738	0.885	0.66	1.3695e-19	5	FAM20C
3.4668e-18	0.906683	0.755	0.417	2.5679e-14	5	SERPINB6
4.0425e-08	0.903207	0.349	0.174	0.00029943	5	RBM25
8.2135e-07	0.900701	0.302	0.154	0.00608377	5	IGSF3
1.0533e-07	0.891775	0.323	0.157	0.00078018	5	YWHAB
8.9911e-09	0.891137	0.37	0.181	6.6597e-05	5	PKIG
4.4265e-15	0.890615	0.672	0.368	3.2787e-11	5	RALY
4.1102e-09	0.889166	0.396	0.196	3.0444e-05	5	ATP2B4
4.5594e-08	0.887525	0.349	0.173	0.00033772	5	PAQR8
4.5927e-08	0.885405	0.333	0.16	0.00034018	5	STIM1
1.2138e-07	0.883225	0.318	0.154	0.00089903	5	PARP4
2.3335e-07	0.883024	0.302	0.146	0.00172842	5	PRKCE
1.1364e-08	0.881766	0.365	0.177	8.4174e-05	5	TIPRL
1.5558e-09	0.881649	0.427	0.218	1.1524e-05	5	CYP27A1
1.4515e-12	0.879226	0.589	0.322	1.0751e-08	5	TMEM59
1.2569e-07	0.878674	0.318	0.155	0.00093102	5	ADAM19
3.5761e-14	0.870612	0.693	0.408	2.6488e-10	5	GDI2
2.3494e-11	0.865311	0.599	0.354	1.7402e-07	5	DCBLD2
1.4413e-17	0.86199	0.792	0.451	1.0675e-13	5	COMT
3.095e-13	0.860463	0.615	0.33	2.2925e-09	5	CBR1
6.8073e-08	0.860304	0.307	0.144	0.00050422	5	NAV1
2.2866e-08	0.858956	0.359	0.176	0.00016937	5	SEMA3C
1.9648e-12	0.857588	0.531	0.264	1.4554e-08	5	MTPN
2.9255e-07	0.854788	0.307	0.15	0.00216689	5	PURA
1.1065e-08	0.854173	0.479	0.276	8.1962e-05	5	SAT1
1.9828e-18	0.8517	0.854	0.597	1.4686e-14	5	EIF4G2
5.5697e-09	0.851515	0.411	0.21	4.1255e-05	5	GET3
8.8416e-11	0.851262	0.49	0.247	6.549e-07	5	UBE2I
1.1262e-06	0.850051	0.281	0.138	0.00834168	5	PAQR4
6.1211e-08	0.850051	0.365	0.186	0.00045339	5	VKORC1
1.0277e-09	0.849329	0.49	0.271	7.6119e-06	5	RAB11A
7.0854e-09	0.848387	0.391	0.194	5.2482e-05	5	SPCS3
2.9326e-09	0.848266	0.411	0.205	2.1722e-05	5	SDC4
9.1319e-11	0.846883	0.516	0.275	6.764e-07	5	CTSA
2.8902e-33	0.844699	0.974	0.901	2.1408e-29	5	CDH19
1.15e-06	0.842082	0.333	0.178	0.00851769	5	MMP16
1.7318e-16	0.84163	0.807	0.494	1.2827e-12	5	PLAUR
5.6843e-15	0.840447	0.708	0.389	4.2103e-11	5	NME4
7.6502e-10	0.839316	0.448	0.226	5.6665e-06	5	MAP7D1
3.0355e-10	0.838995	0.49	0.256	2.2484e-06	5	TGFB1
4.586e-09	0.835995	0.438	0.23	3.3969e-05	5	SHISA5
3.9314e-15	0.834623	0.667	0.341	2.912e-11	5	COX6C
3.1955e-08	0.834414	0.349	0.169	0.00023669	5	NDUFS3
7.191e-14	0.833874	0.635	0.332	5.3264e-10	5	EMC10
2.629e-09	0.833356	0.479	0.257	1.9473e-05	5	TGFBR2
1.295e-10	0.832808	0.51	0.268	9.5917e-07	5	RPN1
5.712e-09	0.827375	0.443	0.235	4.2309e-05	5	TMEM50A

## Sheet: UKF3_DEG
p_val	avg_log2FC	pct.1	pct.2	p_val_adj	bayes_space	gene
1.37639e-09	3.408	0.022	0.001	1.17626e-05	1	MYOD1
3.1326e-14	3.23334	0.031	0.001	2.67712e-10	1	GPR143
3.17948e-12	2.81005	0.025	0.001	2.71718e-08	1	ERICH6
1.02484e-06	2.63741	0.022	0.003	0.00875827	1	FOXD4
3.56621e-12	2.41009	0.031	0.002	3.04768e-08	1	SLC25A41
5.5261e-08	2.3416	0.033	0.005	0.000472261	1	KCNG1
3.33748e-11	2.30068	0.036	0.004	2.85221e-07	1	TMEM89
1.14224e-14	2.12533	0.033	0.002	9.76156e-11	1	SEZ6
4.3331e-09	2.06418	0.045	0.008	3.70307e-05	1	OXTR
6.94278e-09	2.05969	0.033	0.005	5.9333e-05	1	MIXL1
4.38578e-07	2.00451	0.028	0.004	0.00374809	1	IL17B
1.09328e-34	1.84981	0.131	0.015	9.34316e-31	1	FTCD
8.36182e-15	1.83471	0.039	0.003	7.14601e-11	1	OR9A2
3.36781e-23	1.74634	0.067	0.005	2.87813e-19	1	GJB1
6.3982e-21	1.72377	0.067	0.006	5.4679e-17	1	EFCAB5
3.78563e-37	1.70468	0.125	0.012	3.2352e-33	1	ZMYND12
1.51719e-19	1.67462	0.086	0.013	1.29659e-15	1	CXCR6
4.28793e-11	1.67422	0.025	0.001	3.66446e-07	1	ATP6AP1L
7.10701e-07	1.58784	0.025	0.004	0.00607365	1	SMIM35
1.70856e-08	1.54802	0.039	0.007	0.000146013	1	KCNA2
1.88897e-13	1.54304	0.058	0.009	1.61431e-09	1	TMEM52
1.24384e-10	1.52966	0.022	0.001	1.06298e-06	1	TENT5D
2.0917e-09	1.52901	0.033	0.004	1.78757e-05	1	CXCL8
8.01066e-23	1.4563	0.095	0.013	6.84591e-19	1	FMN2
1.04491e-16	1.44036	0.078	0.012	8.9298e-13	1	MLIP
4.2926e-25	1.43191	0.12	0.019	3.66846e-21	1	FRMPD3
4.79828e-15	1.3953	0.061	0.009	4.10061e-11	1	NOXRED1
6.9472e-22	1.38125	0.084	0.01	5.93708e-18	1	USP51
3.9078e-17	1.37395	0.072	0.01	3.33961e-13	1	LRRIQ3
1.05247e-14	1.33459	0.064	0.01	8.99441e-11	1	ERFL
1.63497e-139	1.32625	0.677	0.111	1.39725e-135	1	B3GALT1
4.43103e-32	1.32007	0.159	0.026	3.78676e-28	1	A1BG
1.82289e-11	1.31987	0.05	0.008	1.55785e-07	1	DDN
3.67561e-31	1.31216	0.181	0.034	3.14117e-27	1	CASKIN1
7.94539e-70	1.30574	0.309	0.044	6.79013e-66	1	GALE
3.36525e-11	1.29195	0.036	0.004	2.87594e-07	1	TNNT1
3.70573e-26	1.28548	0.097	0.011	3.16692e-22	1	DPP10
1.70772e-22	1.28463	0.089	0.011	1.45942e-18	1	ALLC
7.95779e-39	1.24638	0.187	0.029	6.80072e-35	1	SEMA7A
5.89275e-12	1.24057	0.042	0.005	5.03594e-08	1	RLBP1
4.6983e-16	1.21912	0.07	0.01	4.01517e-12	1	CYP2D6
2.19818e-22	1.21155	0.125	0.023	1.87856e-18	1	CCDC190
2.74632e-11	1.20322	0.039	0.005	2.34701e-07	1	CLTRN
5.27669e-18	1.19159	0.07	0.009	4.50946e-14	1	AC013470.2
4.31248e-41	1.18134	0.181	0.025	3.68544e-37	1	HPDL
1.3946e-12	1.17091	0.058	0.01	1.19183e-08	1	GRIK5
1.19507e-46	1.15907	0.184	0.022	1.0213e-42	1	HRH3
3.04502e-13	1.15817	0.061	0.01	2.60228e-09	1	GDF9
2.44253e-18	1.14305	0.084	0.013	2.08739e-14	1	LCTL
2.41077e-68	1.13357	0.301	0.042	2.06024e-64	1	PRTG
1.27896e-53	1.13293	0.251	0.037	1.093e-49	1	MSI1
2.32665e-08	1.12141	0.045	0.009	0.000198836	1	C12orf60
4.21281e-137	1.10955	0.872	0.195	3.60027e-133	1	CPN1
6.02792e-10	1.0881	0.042	0.006	5.15146e-06	1	LRRC43
3.28718e-11	1.07362	0.033	0.003	2.80922e-07	1	PRRT1
1.18748e-41	1.07228	0.203	0.032	1.01482e-37	1	SNX25
4.62416e-11	1.06961	0.045	0.006	3.95181e-07	1	FNDC11
1.57813e-09	1.06754	0.042	0.007	1.34867e-05	1	NELL1
8.92886e-19	1.06125	0.092	0.015	7.63061e-15	1	WDR17
2.79921e-40	1.05227	0.195	0.03	2.39221e-36	1	LCE2A
6.32063e-37	1.04615	0.195	0.033	5.40161e-33	1	CYSRT1
2.10826e-124	1.04087	0.68	0.121	1.80172e-120	1	MDGA2
2.18841e-08	1.03666	0.045	0.009	0.000187021	1	DLX4
1.37001e-106	1.03402	0.682	0.143	1.17081e-102	1	SULT4A1
9.269e-46	1.03256	0.192	0.025	7.92129e-42	1	KIF2C
6.43833e-12	1.03207	0.042	0.005	5.50219e-08	1	ETNPPL
7.3141e-08	1.02938	0.036	0.006	0.000625063	1	HIST1H2BJ
1.07239e-91	1.02377	0.415	0.059	9.16468e-88	1	TMPRSS5
8.87727e-99	1.0207	0.607	0.121	7.58651e-95	1	RNF43
2.61178e-35	1.01709	0.156	0.022	2.23203e-31	1	SMC1B
1.0746e-44	1.01555	0.214	0.033	9.18353e-41	1	AGBL4
6.31502e-34	1.01486	0.145	0.02	5.39682e-30	1	SNX32
1.76317e-92	0.992139	0.476	0.08	1.50681e-88	1	IRS4
2.90182e-20	0.980102	0.084	0.011	2.47989e-16	1	MYO3A
1.18528e-105	0.979019	0.582	0.104	1.01294e-101	1	GPM6B
1.82278e-80	0.977803	0.496	0.099	1.55774e-76	1	PLAG1
2.57998e-36	0.976549	0.17	0.026	2.20485e-32	1	TAS2R50
8.39171e-21	0.95465	0.106	0.018	7.17156e-17	1	MINAR1
1.83201e-17	0.948313	0.097	0.018	1.56564e-13	1	FAXC
1.01774e-123	0.945196	0.864	0.201	8.69757e-120	1	ST3GAL6
2.92194e-76	0.942055	1	0.472	2.49709e-72	1	BBS5
4.93896e-85	0.937986	0.448	0.076	4.22083e-81	1	EPHA5
2.66092e-132	0.934891	0.769	0.15	2.27402e-128	1	LRRTM4
1.82004e-22	0.93171	0.111	0.018	1.5554e-18	1	CTNNA2
2.19597e-81	0.930263	0.983	0.377	1.87668e-77	1	LIN28A
7.3275e-18	0.929926	0.081	0.012	6.26208e-14	1	CCL4L2
8.55997e-37	0.926295	0.209	0.038	7.31535e-33	1	ODF3L2
1.43766e-19	0.924863	0.12	0.025	1.22862e-15	1	METTL7B
1.46864e-61	0.919769	0.304	0.048	1.2551e-57	1	NTNG1
5.70312e-71	0.916135	0.37	0.062	4.87389e-67	1	HPS3
3.75502e-68	0.91392	0.309	0.044	3.20904e-64	1	SLC19A1
2.94397e-21	0.907861	0.145	0.032	2.51592e-17	1	TRAJ4
2.09873e-71	0.907609	1	0.491	1.79357e-67	1	TFAP2A
1.09046e-120	0.9024	0.894	0.218	9.31906e-117	1	QPRT
8.84534e-29	0.896188	0.134	0.02	7.55923e-25	1	GBX2
9.8946e-51	0.895737	0.217	0.029	8.45593e-47	1	NUDT6
5.69487e-49	0.892747	0.242	0.038	4.86684e-45	1	SHC4
3.16315e-61	0.889255	0.29	0.044	2.70323e-57	1	FAM166C
1.60178e-09	0.888814	0.042	0.007	1.36888e-05	1	TRAV10
4.98159e-27	0.885456	0.167	0.034	4.25727e-23	1	CENPA
6.05559e-90	0.885173	0.501	0.091	5.17511e-86	1	ETNK2
1.72001e-20	0.88368	0.103	0.017	1.46992e-16	1	FBXO15
2.53891e-96	0.88203	0.627	0.134	2.16975e-92	1	CPNE7
3.89945e-48	0.880806	0.273	0.05	3.33247e-44	1	YBX1
8.20591e-69	0.88045	0.997	0.442	7.01277e-65	1	KIAA1211
6.28273e-39	0.878837	0.214	0.038	5.36922e-35	1	GZMA
4.73108e-13	0.878615	0.064	0.011	4.04318e-09	1	NTN3
1.07851e-59	0.87699	0.379	0.077	9.21696e-56	1	XPO5
1.03193e-56	0.874087	0.37	0.076	8.81891e-53	1	C17orf97
1.88596e-18	0.87408	0.067	0.008	1.61174e-14	1	TMEM26
2.82309e-67	0.86732	0.357	0.06	2.41261e-63	1	ABHD12B
2.25927e-108	0.866046	0.916	0.252	1.93077e-104	1	NLGN1
2.21245e-33	0.866041	0.187	0.034	1.89076e-29	1	ZNF597
1.25551e-77	0.858166	1	0.683	1.07296e-73	1	TYR
4.07213e-40	0.853949	0.203	0.033	3.48004e-36	1	APOBEC3H
1.51454e-87	0.84985	0.518	0.099	1.29433e-83	1	TSPYL5
3.92816e-65	0.847629	0.39	0.075	3.35701e-61	1	VAX2
3.03969e-52	0.847089	0.273	0.046	2.59772e-48	1	TMEM132D
9.49708e-16	0.84469	0.084	0.015	8.11621e-12	1	B3GNT10
1.94227e-16	0.843278	0.084	0.015	1.65986e-12	1	PANX2
2.05329e-30	0.841388	0.142	0.022	1.75474e-26	1	GJC3
1.88079e-16	0.836275	0.095	0.018	1.60732e-12	1	SCN8A
7.01534e-111	0.833548	0.76	0.17	5.99531e-107	1	TMEM177
4.13012e-84	0.832637	0.994	0.36	3.5296e-80	1	NPAS3
1.10988e-23	0.829732	0.117	0.019	9.485e-20	1	MYCN
1.97248e-59	0.829283	0.331	0.059	1.68568e-55	1	CXXC4
1.00561e-08	0.826586	0.053	0.012	8.59391e-05	1	PSMC3IP
1.01173e-56	0.823938	0.404	0.091	8.64621e-53	1	KLRK1
1.67395e-10	0.823485	0.061	0.013	1.43056e-06	1	GZMH
7.05722e-34	0.822921	0.153	0.022	6.0311e-30	1	CIB2
1.93071e-103	0.821673	0.744	0.172	1.64999e-99	1	EDNRB
6.80392e-68	0.821406	1	0.456	5.81463e-64	1	LRP2
3.2027e-104	0.820239	0.9	0.248	2.73702e-100	1	KCNS3
1.03655e-94	0.819043	0.825	0.227	8.85837e-91	1	BCHE
4.10949e-42	0.818393	0.256	0.05	3.51197e-38	1	DUSP9
6.1364e-07	0.815761	0.042	0.01	0.00524417	1	S100Z
1.67761e-51	0.81575	0.301	0.057	1.43368e-47	1	GAS2L3
2.17271e-27	0.815712	0.167	0.033	1.8568e-23	1	ZNF485
2.09675e-40	0.811576	0.209	0.035	1.79189e-36	1	ZKSCAN7
1.14232e-75	0.808746	1	0.738	9.76225e-72	1	PCDH7
1.47689e-72	0.808583	0.398	0.07	1.26215e-68	1	GPR161
1.7691e-10	0.807207	0.058	0.012	1.51187e-06	1	PRAC2
3.57759e-08	0.806832	0.05	0.011	0.00030574	1	TMEM88B
4.01442e-110	0.805894	0.919	0.242	3.43073e-106	1	ARMCX2
7.17069e-24	0.803674	0.114	0.018	6.12807e-20	1	ZFP57
1.57959e-89	0.803577	0.568	0.115	1.34992e-85	1	CCDC14
2.63435e-104	0.801774	0.886	0.239	2.25131e-100	1	CHRM1
2.90674e-101	0.801452	0.95	0.28	2.4841e-97	1	GALNT3
3.05815e-32	0.79904	0.198	0.039	2.61349e-28	1	TRMT9B
1.37265e-23	0.794178	0.106	0.016	1.17306e-19	1	LRIT3
6.56608e-101	0.791219	1	0.892	5.61137e-97	1	PRAME
3.15842e-40	0.788664	0.24	0.046	2.69918e-36	1	CD96
4.31451e-24	0.785853	0.167	0.037	3.68718e-20	1	ACCSL
2.21292e-07	0.785834	0.025	0.003	0.00189116	1	RTL9
2.97488e-63	0.784407	0.994	0.442	2.54234e-59	1	P2RX7
5.56823e-37	0.782539	0.212	0.039	4.75861e-33	1	NAT16
1.12252e-105	0.781072	0.749	0.172	9.59305e-102	1	STRADB
1.74803e-109	0.78042	0.855	0.213	1.49387e-105	1	VANGL2
3.80078e-66	0.778959	0.997	0.67	3.24814e-62	1	FAM178B
1.67428e-10	0.776659	0.064	0.014	1.43084e-06	1	YY2
1.84276e-22	0.774197	0.128	0.024	1.57482e-18	1	PROSER2
1.77551e-54	0.774014	0.279	0.046	1.51735e-50	1	PNMA3
3.18211e-28	0.773054	0.125	0.018	2.71943e-24	1	BEGAIN
3.46901e-51	0.772782	0.253	0.04	2.96462e-47	1	NLGN3
1.26211e-25	0.771691	0.136	0.024	1.0786e-21	1	C19orf57
4.30583e-109	0.769525	0.682	0.136	3.67976e-105	1	SLC26A1
6.56258e-114	0.769382	0.774	0.173	5.60838e-110	1	GEN1
7.80709e-103	0.769285	0.797	0.198	6.67194e-99	1	NEFH
8.57178e-38	0.768869	0.178	0.027	7.32544e-34	1	SUV39H2
1.1065e-08	0.766601	0.05	0.011	9.45617e-05	1	HSF2BP
1.27912e-114	0.76653	0.903	0.228	1.09314e-110	1	SLC6A15
3.74602e-113	0.765626	1	0.946	3.20135e-109	1	SDCBP
1.10025e-06	0.763825	0.042	0.01	0.00940274	1	LRRTM2
9.97233e-110	0.761708	0.738	0.157	8.52236e-106	1	OCA2
1.33799e-85	0.761345	0.981	0.341	1.14344e-81	1	PLEKHH1
1.97845e-14	0.760918	0.047	0.005	1.69078e-10	1	DOK5
2.03397e-115	0.758605	0.763	0.165	1.73823e-111	1	ALX1
1.17275e-87	0.758273	0.602	0.129	1.00223e-83	1	SLC7A1
4.44687e-95	0.757929	0.63	0.131	3.80029e-91	1	FBXO10
1.8799e-14	0.757355	0.078	0.015	1.60656e-10	1	CECR2
8.0986e-22	0.755871	0.117	0.021	6.92107e-18	1	GPLD1
1.06964e-32	0.755726	0.201	0.04	9.14116e-29	1	DNA2
2.09467e-109	0.754598	0.799	0.189	1.7901e-105	1	SDK2
2.8025e-58	0.754366	1	0.49	2.39502e-54	1	STK32A
1.39477e-103	0.752394	0.936	0.268	1.19197e-99	1	MAML3
7.96744e-24	0.75072	0.12	0.02	6.80897e-20	1	CDH4
1.28084e-21	0.750675	0.123	0.023	1.09461e-17	1	IQANK1
1.44923e-117	0.748825	1	0.983	1.23851e-113	1	WARS
5.1519e-90	0.748075	0.66	0.15	4.40282e-86	1	FMNL2
1.52055e-100	0.747965	0.805	0.2	1.29947e-96	1	TIAF1
2.90483e-95	0.746871	0.916	0.262	2.48247e-91	1	SSUH2
4.48407e-93	0.745173	0.474	0.077	3.83209e-89	1	ZNF280A
4.51505e-67	0.745147	0.992	0.421	3.85856e-63	1	DNAJA4
1.15767e-12	0.74379	0.095	0.023	9.89341e-09	1	GTF2A2
8.07607e-39	0.743789	0.201	0.033	6.90181e-35	1	MOV10L1
5.93445e-92	0.739951	0.894	0.266	5.07158e-88	1	LONRF1
1.5627e-112	0.737813	0.838	0.202	1.33548e-108	1	ZNF608
1.88349e-60	0.737471	1	0.583	1.60963e-56	1	TBC1D7
8.14404e-34	0.736715	0.189	0.034	6.9599e-30	1	CDCA5
1.14029e-09	0.736602	0.047	0.009	9.74493e-06	1	BTNL8
9.20131e-108	0.736406	0.691	0.139	7.86344e-104	1	SGCD
1.18062e-63	0.736308	1	0.708	1.00895e-59	1	PIR
2.61263e-86	0.736059	0.942	0.305	2.23275e-82	1	TRAK2
5.4495e-78	0.735378	0.953	0.314	4.65714e-74	1	NCBP2AS2
1.94186e-58	0.735235	1	0.478	1.65951e-54	1	PAK4
2.41832e-20	0.734611	0.1	0.017	2.0667e-16	1	TTK
8.63925e-55	0.734342	0.994	0.471	7.38311e-51	1	LDB3
5.7903e-91	0.733976	0.721	0.176	4.94839e-87	1	TIMM17A
2.93908e-62	0.733649	0.997	0.428	2.51174e-58	1	SOX5
5.65185e-09	0.731671	0.05	0.01	4.83007e-05	1	ACY3
1.00933e-17	0.730902	0.089	0.015	8.62573e-14	1	SPATA5
1.31129e-66	0.730411	1	0.765	1.12063e-62	1	MMP17
2.41952e-13	0.728921	0.067	0.012	2.06772e-09	1	LRRC4B
6.49695e-84	0.727146	0.546	0.113	5.5523e-80	1	HOXB13
1.24329e-86	0.721646	0.961	0.33	1.06252e-82	1	GAD2
2.39685e-94	0.721528	1	0.969	2.04835e-90	1	TYRP1
5.5469e-69	0.71733	0.557	0.137	4.74038e-65	1	STXBP1
5.88806e-10	0.715644	0.05	0.009	5.03194e-06	1	FAM71E1
2.26155e-92	0.715394	0.936	0.28	1.93272e-88	1	ARHGAP39
7.33977e-103	0.715195	0.844	0.221	6.27257e-99	1	CCDC78
3.16822e-91	0.714956	0.635	0.138	2.70756e-87	1	IMMP2L
1.27605e-93	0.713559	0.967	0.307	1.09051e-89	1	APBA2
9.92044e-55	0.713034	0.992	0.469	8.47801e-51	1	R3HCC1L
1.02653e-63	0.71242	0.373	0.069	8.77275e-60	1	DNALI1
7.96166e-89	0.711447	0.56	0.111	6.80403e-85	1	CALHM6
8.49657e-61	0.710695	0.365	0.069	7.26117e-57	1	CYP26C1
3.51794e-53	0.709439	0.997	0.538	3.00643e-49	1	TRAF4
1.01655e-52	0.708983	1	0.575	8.68746e-49	1	MITF
5.99922e-08	0.707875	0.058	0.015	0.000512694	1	IL11
3.39917e-32	0.706262	0.153	0.024	2.90493e-28	1	SLC5A4
4.18127e-61	0.705454	0.396	0.08	3.57331e-57	1	GDF7
1.61704e-77	0.705163	0.883	0.278	1.38193e-73	1	CLEC2D
1.47123e-52	0.704833	1	0.691	1.25732e-48	1	STAT1
1.87225e-11	0.703431	0.058	0.011	1.60002e-07	1	GNMT
4.18257e-49	0.703324	0.284	0.052	3.57443e-45	1	WNK2
1.18056e-96	0.702966	0.588	0.114	1.00891e-92	1	DDX60
5.17309e-09	0.701942	0.053	0.011	4.42092e-05	1	SYCE1L
1.38649e-66	0.70165	0.421	0.084	1.18489e-62	1	EBI3
5.134e-97	0.701153	0.518	0.088	4.38751e-93	1	CDC7
1.55924e-105	0.700022	0.894	0.238	1.33252e-101	1	SLITRK2
2.43468e-15	0.699855	0.084	0.016	2.08068e-11	1	IMPG2
2.55524e-56	0.699055	1	0.513	2.18371e-52	1	EFHD1
4.42934e-20	0.698872	0.089	0.013	3.78531e-16	1	HSD17B6
3.08644e-69	0.698764	0.989	0.365	2.63767e-65	1	BNC2
9.31826e-102	0.697115	0.903	0.247	7.96338e-98	1	PLA1A
2.18572e-10	0.694358	0.047	0.008	1.86792e-06	1	CAPN14
6.40436e-53	0.693075	0.997	0.549	5.47316e-49	1	RHOBTB3
1.14385e-61	0.69288	0.37	0.071	9.7753e-58	1	MGME1
3.41719e-63	0.692878	0.376	0.071	2.92033e-59	1	GPR19
4.48557e-62	0.691546	0.997	0.436	3.83337e-58	1	PLXNA1
2.52383e-13	0.691303	0.089	0.02	2.15686e-09	1	NKAPL
5.38198e-08	0.691004	0.056	0.014	0.000459944	1	TRBV7-3
4.97684e-57	0.690884	0.997	0.494	4.2532e-53	1	RGS12
7.06732e-10	0.690849	0.053	0.01	6.03973e-06	1	STRA6
3.46552e-103	0.690689	0.677	0.142	2.96163e-99	1	TDRD12
2.51488e-81	0.690635	0.549	0.117	2.14922e-77	1	DNAJC25
2.18336e-59	0.689494	1	0.754	1.8659e-55	1	INSC
1.39245e-64	0.688642	0.362	0.064	1.18999e-60	1	PRMT3
4.54714e-27	0.687294	0.162	0.032	3.88598e-23	1	PTGES3L
1.7171e-93	0.686987	0.621	0.129	1.46743e-89	1	EIF1AD
5.81843e-85	0.68698	0.964	0.318	4.97243e-81	1	LSAMP
2.46861e-21	0.685365	0.092	0.013	2.10968e-17	1	KCNQ5
3.33557e-38	0.683502	0.178	0.027	2.85058e-34	1	PBK
1.30439e-33	0.682795	0.153	0.022	1.11473e-29	1	NUDT12
2.67812e-58	0.682034	0.354	0.068	2.28872e-54	1	ETV2
5.40827e-10	0.681907	0.047	0.008	4.62191e-06	1	IFIT2
1.6718e-93	0.681566	0.744	0.18	1.42872e-89	1	CNNM4
1.16042e-47	0.680836	0.315	0.065	9.91698e-44	1	CSKMT
2.99889e-37	0.67983	0.178	0.027	2.56285e-33	1	USP49
8.34749e-106	0.679212	0.749	0.169	7.13376e-102	1	FAM83H
1.02771e-25	0.679076	0.139	0.025	8.78279e-22	1	PDP2
5.41504e-58	0.678786	0.997	0.459	4.62769e-54	1	BTBD3
9.42087e-102	0.678639	0.791	0.19	8.05108e-98	1	NRTN
4.79443e-49	0.677901	0.245	0.039	4.09732e-45	1	CDK1
5.45869e-07	0.675631	0.045	0.011	0.004665	1	OPN4
4.73709e-25	0.671983	0.128	0.022	4.04831e-21	1	CITED1
3.15165e-72	0.668024	0.978	0.375	2.6934e-68	1	PAQR8
9.3261e-98	0.667061	0.822	0.212	7.97008e-94	1	GCAT
2.24308e-103	0.666684	0.891	0.237	1.91694e-99	1	NPAS2
2.83569e-49	0.665962	1	0.57	2.42338e-45	1	APOL6
1.32934e-61	0.664819	0.376	0.072	1.13605e-57	1	CCDC77
3.74919e-94	0.663812	0.819	0.222	3.20405e-90	1	PNMA2
6.59475e-68	0.662226	0.423	0.084	5.63587e-64	1	PTCD2
4.3657e-64	0.662156	0.362	0.065	3.73093e-60	1	SLC35G1
3.20147e-30	0.661971	0.184	0.036	2.73598e-26	1	TRMT6
7.81185e-82	0.660961	0.462	0.083	6.67601e-78	1	RNF122
4.62865e-65	0.660542	1	0.84	3.95564e-61	1	BIRC7
6.70604e-78	0.659939	0.501	0.102	5.73099e-74	1	HFM1
7.368e-09	0.659712	0.033	0.005	6.29669e-05	1	ACOXL
1.50743e-49	0.658884	0.315	0.064	1.28825e-45	1	CSRNP2
4.01696e-104	0.657696	0.749	0.17	3.43289e-100	1	LNX2
2.05841e-62	0.65747	1	0.818	1.75912e-58	1	SNCA
8.67374e-64	0.657054	0.986	0.378	7.41258e-60	1	AOPEP
7.88947e-72	0.657023	0.538	0.125	6.74234e-68	1	TMEM254
8.37396e-105	0.656019	0.649	0.13	7.15639e-101	1	TKTL1
1.25266e-54	0.655952	0.997	0.444	1.07053e-50	1	OBSCN
1.16802e-06	0.653952	0.028	0.005	0.00998191	1	ANKRD23
1.01147e-97	0.653878	1	0.981	8.64401e-94	1	PMEL
2.62123e-59	0.653464	1	0.806	2.2401e-55	1	PEG3
3.98449e-15	0.653032	0.081	0.015	3.40514e-11	1	SAMD13
8.27028e-85	0.65222	0.735	0.193	7.06778e-81	1	GPRIN1
5.09975e-87	0.652198	0.964	0.307	4.35825e-83	1	ABCC2
1.03386e-54	0.652053	0.276	0.044	8.83538e-51	1	EBLN2
2.09352e-47	0.650785	1	0.631	1.78912e-43	1	CRTAC1
4.32437e-08	0.65029	0.019	0.001	0.000369561	1	CFAP46
1.80293e-59	0.649862	0.393	0.081	1.54078e-55	1	NDUFAF7
2.08347e-90	0.649661	0.521	0.096	1.78053e-86	1	CENPL
4.04228e-91	0.649509	0.953	0.295	3.45453e-87	1	CDH19
3.37031e-51	0.648584	0.994	0.457	2.88026e-47	1	ZNF787
4.51052e-93	0.648571	0.872	0.241	3.85469e-89	1	AEN
1.08258e-53	0.64851	0.262	0.041	9.25172e-50	1	ZNF33B
2.54464e-51	0.646982	0.24	0.035	2.17465e-47	1	TRIM16L
1.67541e-97	0.646377	0.593	0.113	1.43181e-93	1	CSTF1
5.62454e-77	0.646069	0.482	0.095	4.80673e-73	1	FOXF2
1.45984e-14	0.645108	0.109	0.027	1.24758e-10	1	HESX1
2.6586e-46	0.644691	1	0.593	2.27204e-42	1	HPS4
2.25238e-11	0.644433	0.064	0.013	1.92488e-07	1	TRAV23DV6
6.8545e-24	0.644046	0.164	0.037	5.85786e-20	1	LRG1
1.22714e-13	0.643909	0.061	0.01	1.04871e-09	1	TSACC
2.33415e-55	0.643799	0.362	0.074	1.99477e-51	1	CPOX
3.57449e-104	0.642433	0.783	0.183	3.05476e-100	1	LMBR1L
2.91405e-10	0.641943	0.067	0.015	2.49034e-06	1	MAP9
1.44831e-89	0.641767	0.827	0.225	1.23773e-85	1	FLAD1
1.22894e-69	0.640529	0.404	0.074	1.05025e-65	1	CYB5R2
1.35338e-44	0.640417	0.223	0.036	1.1566e-40	1	FAAP24
3.16764e-53	0.640264	1	0.686	2.70706e-49	1	GRK3
2.39394e-31	0.639721	0.145	0.022	2.04586e-27	1	PAQR5
1.76471e-08	0.639378	0.039	0.007	0.000150812	1	SYCP2
4.65145e-87	0.638524	0.535	0.104	3.97513e-83	1	RBMXL1
1.1469e-75	0.638512	0.571	0.133	9.80143e-72	1	EXTL2
1.1766e-90	0.638282	1	0.989	1.00552e-86	1	S100B
2.22719e-48	0.63813	1	0.573	1.90336e-44	1	PCMTD2
6.96066e-53	0.637897	0.29	0.05	5.94858e-49	1	MPHOSPH9
3.78616e-98	0.637564	0.877	0.241	3.23565e-94	1	CELSR2
3.69963e-57	0.63717	0.334	0.062	3.1617e-53	1	ZNF283
7.21635e-90	0.635772	0.705	0.171	6.16709e-86	1	P2RX6
5.78589e-103	0.635633	0.811	0.199	4.94462e-99	1	ENOSF1
1.44227e-55	0.635628	0.368	0.076	1.23257e-51	1	DNAJC11
3.48523e-54	0.635532	0.997	0.426	2.97848e-50	1	ABTB2
5.32628e-49	0.63524	0.265	0.046	4.55184e-45	1	ATAT1
6.83932e-11	0.635206	0.072	0.017	5.84488e-07	1	DNASE1L2
4.2967e-101	0.635082	0.713	0.16	3.67196e-97	1	NRG3
2.48434e-59	0.634539	0.997	0.427	2.12311e-55	1	CA14
2.69072e-87	0.634409	0.549	0.109	2.29949e-83	1	PIGW
3.31024e-07	0.633624	0.033	0.006	0.00282893	1	HOXA11
9.7493e-25	0.632999	0.17	0.038	8.33175e-21	1	PRKCA
4.3879e-79	0.63262	0.635	0.157	3.7499e-75	1	LMNB1
3.34797e-47	0.632586	0.32	0.069	2.86117e-43	1	BRIP1
2.98332e-69	0.63219	0.989	0.365	2.54954e-65	1	KCNAB2
6.94636e-98	0.631954	0.933	0.264	5.93636e-94	1	ZMAT3
1.17668e-12	0.631852	0.067	0.012	1.00559e-08	1	KLLN
3.48133e-101	0.631799	0.758	0.176	2.97514e-97	1	CRISPLD1
3.2463e-32	0.631504	0.22	0.048	2.77429e-28	1	SLAMF7
2.67369e-54	0.631117	0.298	0.052	2.28493e-50	1	CD207
6.64079e-95	0.630082	0.922	0.276	5.67522e-91	1	LDLRAD3
6.56192e-60	0.629834	1	0.844	5.60782e-56	1	BEX3
6.61941e-57	0.629108	0.992	0.424	5.65695e-53	1	DERA
3.9766e-27	0.628626	0.156	0.029	3.3984e-23	1	HSPA1L
5.68e-15	0.628349	0.086	0.017	4.85413e-11	1	XRCC4
1.922e-92	0.627841	0.964	0.303	1.64254e-88	1	MOSPD1
1.90394e-55	0.627761	1	0.46	1.62711e-51	1	KCNJ13
1.38075e-90	0.627638	0.702	0.167	1.17999e-86	1	RAD52
1.85004e-48	0.62662	0.997	0.499	1.58104e-44	1	NME1
1.28747e-42	0.626475	1	0.554	1.10027e-38	1	OTUD7B
1.35685e-91	0.625623	0.922	0.271	1.15957e-87	1	C11orf1
6.90002e-58	0.625193	1	0.461	5.89676e-54	1	GMPR
2.74667e-44	0.624032	0.284	0.058	2.34731e-40	1	RAD51AP1
5.41505e-51	0.622345	0.994	0.48	4.6277e-47	1	AKT3
3.28766e-100	0.622307	0.719	0.165	2.80963e-96	1	LRCH2
9.94035e-95	0.622193	0.73	0.174	8.49503e-91	1	SNRPE
2.51657e-46	0.622155	1	0.681	2.15066e-42	1	COL11A2
4.87714e-75	0.621142	0.933	0.31	4.168e-71	1	HIBADH
3.38989e-110	0.621061	0.777	0.173	2.897e-106	1	HPN
1.73688e-44	0.620892	1	0.533	1.48434e-40	1	COL22A1
1.38009e-46	0.62006	1	0.512	1.17942e-42	1	PLAAT4
2.15126e-82	0.619139	0.582	0.127	1.83846e-78	1	NNT
1.03817e-87	0.617537	0.953	0.295	8.87217e-84	1	C5orf22
4.73812e-58	0.61705	0.451	0.106	4.0492e-54	1	CTRL
6.94664e-44	0.615561	0.276	0.055	5.9366e-40	1	CHRNB2
2.74069e-64	0.612804	0.415	0.084	2.34219e-60	1	ALG8
9.41689e-48	0.612262	0.994	0.47	8.04767e-44	1	TRAPPC1
1.05473e-11	0.611584	0.053	0.009	9.01373e-08	1	SYCE2
4.07169e-89	0.611285	0.582	0.12	3.47966e-85	1	FBLL1
4.2709e-10	0.611013	0.075	0.019	3.64992e-06	1	SLAMF1
1.33748e-65	0.610665	0.983	0.376	1.14301e-61	1	PLOD3
6.01352e-64	0.610109	0.994	0.401	5.13916e-60	1	SLC2A13
1.23531e-10	0.609745	0.07	0.016	1.0557e-06	1	TRBV27
3.3446e-65	0.608605	0.994	0.39	2.85829e-61	1	CCT2
2.68159e-43	0.608362	0.295	0.064	2.29169e-39	1	RBM41
1.63539e-07	0.608144	0.053	0.014	0.00139761	1	RPGRIP1
3.951e-44	0.608105	1	0.62	3.37653e-40	1	SOCS6
3.52976e-53	0.607501	0.994	0.44	3.01654e-49	1	EIF3L
1.12816e-57	0.607406	0.384	0.08	9.64125e-54	1	SHROOM2
5.1314e-11	0.607297	0.084	0.021	4.3853e-07	1	CARMIL3
1.96642e-44	0.605982	0.997	0.573	1.6805e-40	1	DMXL1
2.09642e-54	0.605833	0.295	0.051	1.7916e-50	1	TSPAN6
6.41472e-68	0.605604	0.44	0.088	5.48202e-64	1	ZNF74
1.25557e-56	0.604718	0.376	0.079	1.07301e-52	1	TNFRSF9
8.06042e-93	0.604675	0.638	0.136	6.88844e-89	1	FHIT
2.299e-97	0.604581	0.747	0.174	1.96472e-93	1	FBXW9
2.05398e-21	0.603647	0.136	0.028	1.75533e-17	1	ZC2HC1C
1.12472e-68	0.603559	0.972	0.357	9.61183e-65	1	LZTS1
8.46078e-08	0.603456	0.042	0.009	0.000723058	1	LINC02694
7.59429e-62	0.603439	0.986	0.396	6.49008e-58	1	SLC25A13
2.1987e-51	0.600921	0.992	0.46	1.87901e-47	1	ARNT2
2.04037e-99	0.600418	0.752	0.173	1.7437e-95	1	SMARCAD1
8.50908e-76	0.600239	0.46	0.088	7.27186e-72	1	RALGPS2
2.87454e-90	0.600089	0.747	0.188	2.45658e-86	1	CHST3
1.82719e-38	0.599753	0.997	0.531	1.56152e-34	1	IRF4
7.30648e-59	0.599412	0.997	0.399	6.24412e-55	1	TATDN3
1.32411e-51	0.598757	0.994	0.445	1.13159e-47	1	TLE1
7.08857e-14	0.598298	0.064	0.01	6.05789e-10	1	SLC16A5
7.60022e-77	0.597615	0.933	0.314	6.49515e-73	1	RTKN
7.61993e-50	0.597306	0.315	0.063	6.51199e-46	1	CCNA2
2.71056e-75	0.596639	0.412	0.071	2.31644e-71	1	SLC25A15
5.57162e-92	0.596638	0.905	0.261	4.76151e-88	1	SAPCD1
3.22899e-41	0.596275	1	0.564	2.7595e-37	1	TMEM258
1.78557e-89	0.59613	0.685	0.161	1.52595e-85	1	CSAG3
6.49302e-47	0.595835	1	0.56	5.54894e-43	1	SNAI2
1.19316e-37	0.595632	0.209	0.037	1.01967e-33	1	PALB2
1.92058e-45	0.595423	0.251	0.044	1.64133e-41	1	CDC45
1.01996e-93	0.594338	0.763	0.19	8.71658e-90	1	SPATS2
1.06322e-96	0.593305	0.749	0.178	9.08628e-93	1	PRR7
3.78712e-73	0.593084	0.955	0.338	3.23647e-69	1	PTPRJ
1.27945e-52	0.592811	0.994	0.466	1.09342e-48	1	OSBPL9
1.48374e-20	0.592449	0.136	0.03	1.268e-16	1	MBLAC1
8.14601e-90	0.591915	0.579	0.118	6.96158e-86	1	NDUFAF6
3.06151e-10	0.59124	0.061	0.013	2.61637e-06	1	PDZK1
1.07394e-57	0.591183	0.306	0.052	9.17785e-54	1	WDR35
5.66834e-87	0.591156	0.838	0.236	4.84417e-83	1	SPOUT1
6.37891e-96	0.591124	0.752	0.183	5.45142e-92	1	COLEC11
1.26842e-08	0.591012	0.036	0.006	0.000108399	1	ORC6
5.00455e-69	0.59074	0.443	0.089	4.27689e-65	1	MFSD9
1.25511e-89	0.590725	0.666	0.153	1.07261e-85	1	ZDHHC4
3.95081e-19	0.59072	0.097	0.017	3.37636e-15	1	RNF225
2.322e-43	0.590078	1	0.6	1.98438e-39	1	SLC24A5
8.70564e-47	0.589772	1	0.732	7.43984e-43	1	PAX3
3.6938e-81	0.588904	0.969	0.33	3.15672e-77	1	SORT1
9.81243e-95	0.588712	0.652	0.138	8.3857e-91	1	TRAPPC13
2.57083e-76	0.588123	0.476	0.093	2.19703e-72	1	CENPBD1
3.26282e-64	0.587417	0.437	0.094	2.78841e-60	1	MAGI2
4.62501e-65	0.587346	0.357	0.063	3.95254e-61	1	TEX14
7.19463e-43	0.58645	1	0.643	6.14853e-39	1	CTNND1
1.82416e-31	0.586396	0.156	0.025	1.55892e-27	1	EPB41
5.48554e-31	0.585914	0.206	0.044	4.68794e-27	1	E2F3
1.62806e-30	0.585516	0.139	0.021	1.39134e-26	1	PTGER1
6.9177e-70	0.585286	0.465	0.097	5.91187e-66	1	C16orf95
1.13845e-56	0.584444	1	0.814	9.72919e-53	1	NONO
1.19332e-90	0.584212	0.786	0.201	1.01981e-86	1	ITM2C
9.8068e-82	0.584064	0.922	0.293	8.38089e-78	1	B4GAT1
1.25781e-70	0.583905	0.412	0.076	1.07492e-66	1	NKAIN1
4.63071e-102	0.582941	0.749	0.172	3.95741e-98	1	NR6A1
6.91301e-91	0.582855	0.632	0.138	5.90786e-87	1	PRAG1
7.17431e-07	0.58245	0.025	0.004	0.00613116	1	ELMOD1
3.3781e-93	0.580791	0.618	0.127	2.88692e-89	1	RPRD1A
3.5691e-62	0.580611	0.989	0.377	3.05015e-58	1	NUDT5
2.41306e-42	0.580607	0.337	0.082	2.0622e-38	1	FBXO45
2.5098e-40	0.580116	1	0.621	2.14487e-36	1	MYO5A
1.23552e-79	0.579471	0.925	0.292	1.05588e-75	1	CELSR1
1.46404e-89	0.579036	0.585	0.121	1.25117e-85	1	ARAP2
1.41789e-49	0.57894	0.273	0.048	1.21173e-45	1	WDR31
2.1367e-50	0.577989	0.329	0.067	1.82602e-46	1	HOMER1
1.18019e-89	0.577717	0.749	0.188	1.00859e-85	1	EEF1E1
7.85071e-49	0.576948	0.997	0.464	6.70922e-45	1	PTAR1
2.40138e-72	0.576569	0.443	0.086	2.05222e-68	1	CFAP74
3.73114e-51	0.576564	0.997	0.493	3.18863e-47	1	METRN
4.1571e-07	0.576538	0.028	0.004	0.00355266	1	MRGPRX3
1.09685e-06	0.575902	0.042	0.01	0.00937369	1	CCDC34
9.191e-11	0.574417	0.061	0.012	7.85463e-07	1	SLC22A31
2.26926e-68	0.574386	0.487	0.107	1.93931e-64	1	USP48
9.69933e-22	0.573698	0.117	0.021	8.28904e-18	1	RBM11
3.38742e-84	0.573436	0.947	0.3	2.89489e-80	1	BCAS4
3.34473e-101	0.573198	0.894	0.237	2.85841e-97	1	POLR3G
4.97487e-97	0.572417	0.836	0.219	4.25153e-93	1	MYL6B
2.06235e-59	0.571171	1	0.9	1.76248e-55	1	MYC
2.44711e-86	0.571054	0.708	0.176	2.0913e-82	1	HACD1
2.89295e-18	0.569935	0.103	0.02	2.47232e-14	1	DUSP19
2.23429e-69	0.569223	0.513	0.115	1.90943e-65	1	MAP11
2.56872e-07	0.568946	0.031	0.005	0.00219522	1	POLR3B
3.61615e-64	0.568755	1	0.887	3.09036e-60	1	CAPN3
4.8893e-91	0.568403	0.864	0.243	4.17839e-87	1	CD200
3.91058e-95	0.568249	0.696	0.16	3.34198e-91	1	MAP2K6
7.66096e-101	0.568134	0.925	0.256	6.54706e-97	1	ACVR2B
3.53691e-52	0.567922	0.994	0.45	3.02265e-48	1	GUCD1
6.05401e-07	0.56771	0.031	0.005	0.00517375	1	SNTG1
2.08375e-86	0.567304	0.919	0.29	1.78078e-82	1	IGF2BP2
4.6627e-95	0.567234	0.724	0.169	3.98474e-91	1	CENPN
1.33678e-53	0.564944	0.992	0.444	1.14241e-49	1	TEAD1
4.40642e-38	0.564648	1	0.551	3.76573e-34	1	LRCH4
9.4895e-90	0.563824	0.911	0.264	8.10973e-86	1	PSMB9
2.85532e-18	0.56248	0.109	0.022	2.44016e-14	1	NPW
8.12288e-91	0.561884	0.894	0.258	6.94182e-87	1	MSH5
2.25811e-76	0.560443	0.702	0.189	1.92978e-72	1	L3MBTL1
1.1695e-13	0.560066	0.056	0.008	9.99452e-10	1	NLGN4X
3.16245e-68	0.559963	0.955	0.357	2.70263e-64	1	ADSS
2.73429e-43	0.55851	1	0.671	2.33672e-39	1	TIMM50
1.75792e-88	0.558458	0.852	0.235	1.50232e-84	1	HIC2
7.10793e-14	0.558427	0.081	0.016	6.07444e-10	1	EXO1
7.38023e-67	0.558021	0.961	0.346	6.30714e-63	1	MSH2
4.41982e-88	0.557999	0.696	0.167	3.77718e-84	1	PNPLA3
2.0589e-32	1.46823	0.55	0.512	1.75953e-28	2	G0S2
5.09539e-07	1.40394	0.006	0.028	0.00435452	2	RFPL2
2.39725e-08	1.31622	0.009	0.038	0.000204869	2	TRAV8-1
1.3232e-07	1.18096	0.01	0.038	0.00113081	2	MCM10
9.18312e-09	1.14878	0.012	0.045	7.8479e-05	2	ZNF239
2.40401e-08	1.07262	0.007	0.035	0.000205447	2	BEST4
1.81725e-09	1.0589	0.006	0.035	1.55302e-05	2	RGS20
1.20506e-07	1.05588	0.019	0.055	0.00102985	2	MESP1
1.52421e-09	1.04438	0.095	0.184	1.30259e-05	2	LIPE
2.10557e-07	0.927859	0.007	0.032	0.00179942	2	ANGPTL7
6.08402e-32	0.909543	0.198	0.481	5.19941e-28	2	GPAM
4.21823e-63	0.902566	0.756	0.855	3.6049e-59	2	IGHM
1.94922e-15	0.898102	0.032	0.106	1.6658e-11	2	TF
2.12214e-08	0.897187	0.013	0.047	0.000181358	2	TNFRSF8
1.02399e-08	0.885186	0.006	0.033	8.75104e-05	2	CFAP77
2.17715e-17	0.883491	0.023	0.094	1.86059e-13	2	CSTF2
6.08479e-07	0.84817	0.013	0.042	0.00520006	2	CFAP69
2.87835e-15	0.837844	0.033	0.107	2.45984e-11	2	IGHV6-1
5.54735e-08	0.833842	0.016	0.05	0.000474076	2	PCDHGA3
6.41764e-09	0.826797	0.038	0.09	5.48452e-05	2	PHGDH
6.34965e-15	0.809842	0.024	0.089	5.42641e-11	2	PKN3
5.85246e-08	0.795028	0.009	0.038	0.000500151	2	ADAMTS14
1.01367e-08	0.792047	0.014	0.049	8.66282e-05	2	GRHL3
1.09854e-12	0.789431	0.012	0.057	9.38813e-09	2	PIPOX
4.00255e-07	0.787711	0.022	0.058	0.00342058	2	VMO1
4.84827e-07	0.778713	0.01	0.038	0.00414333	2	ALPK3
4.53444e-07	0.776841	0.009	0.035	0.00387513	2	LIN7A
3.23708e-10	0.775488	0.015	0.056	2.76641e-06	2	C11orf45
4.584e-21	0.775378	0.032	0.123	3.91749e-17	2	NLRC3
4.14155e-12	0.775181	0.014	0.061	3.53937e-08	2	NRL
3.80407e-07	0.76565	0.005	0.026	0.00325095	2	MYT1
2.8498e-07	0.759446	0.033	0.076	0.00243544	2	SOBP
9.58947e-23	0.757003	0.028	0.121	8.19516e-19	2	IPO7
1.34778e-32	0.75263	0.033	0.16	1.15181e-28	2	SNAI1
5.49382e-07	0.745066	0.016	0.047	0.00469502	2	SAA2
1.63258e-07	0.7422	0.009	0.037	0.00139521	2	OTUD7A
3.9429e-12	0.739884	0.011	0.054	3.3696e-08	2	PIMREG
2.31008e-10	0.730116	0.013	0.053	1.97419e-06	2	DYRK4
5.50655e-13	0.724238	0.016	0.066	4.7059e-09	2	KIF20A
1.39153e-09	0.71894	0.011	0.047	1.1892e-05	2	TRPC6
9.84064e-10	0.717856	0.01	0.046	8.40981e-06	2	SERPINF2
7.10353e-14	0.713961	0.012	0.06	6.07068e-10	2	CEP55
3.61457e-10	0.710165	0.008	0.042	3.08901e-06	2	WNT3
7.97497e-50	0.706912	0.065	0.276	6.81541e-46	2	TLR8
4.1969e-09	0.705789	0.012	0.047	3.58667e-05	2	FAM13B
1.02231e-06	0.702142	0.005	0.026	0.00873666	2	WDR93
6.69196e-43	0.699239	0.149	0.423	5.71895e-39	2	S100A9
3.98831e-26	0.692991	0.02	0.114	3.40841e-22	2	ZNF214
3.33701e-13	0.692048	0.016	0.067	2.85181e-09	2	PCSK2
3.3314e-15	0.689173	0.015	0.072	2.84702e-11	2	ACRBP
1.62277e-09	0.683186	0.01	0.045	1.38682e-05	2	GPR162
3.94785e-11	0.682875	0.018	0.065	3.37383e-07	2	TDRKH
7.36931e-07	0.681914	0.006	0.029	0.00629781	2	GTSF1L
1.69667e-27	0.666438	0.111	0.293	1.44998e-23	2	PPARG
3.63869e-10	0.660127	0.008	0.042	3.10962e-06	2	RGS1
3.37456e-31	0.659942	0.04	0.169	2.8839e-27	2	CCNB2
9.73919e-37	0.65917	0.03	0.165	8.32311e-33	2	KCNJ2
6.74083e-15	0.654514	0.02	0.08	5.76072e-11	2	GPAT2
7.83577e-22	0.648057	0.018	0.098	6.69645e-18	2	HES5
3.67298e-41	0.638141	0.056	0.233	3.13893e-37	2	FCGR1A
3.22413e-10	0.636667	0.015	0.056	2.75534e-06	2	HCAR2
9.07496e-08	0.632947	0.013	0.045	0.000775546	2	WNT2B
7.16132e-30	0.631068	0.051	0.188	6.12006e-26	2	IDO1
8.18164e-54	0.629341	0.109	0.381	6.99203e-50	2	BTF3
1.01942e-06	0.627756	0.005	0.026	0.00871193	2	MGAT5B
1.38387e-16	0.624834	0.027	0.099	1.18266e-12	2	NACAD
7.51896e-18	0.623931	0.015	0.079	6.4257e-14	2	SPC25
4.19145e-08	0.621992	0.009	0.038	0.000358202	2	PTPRH
2.00094e-23	0.62068	0.064	0.191	1.71e-19	2	IGFBP2
1.25708e-29	0.618606	0.035	0.154	1.0743e-25	2	ANKRD22
4.88839e-14	0.617859	0.017	0.072	4.17762e-10	2	MYBL1
2.8385e-30	0.61677	0.031	0.148	2.42579e-26	2	TCEA1
2.92833e-12	0.616483	0.017	0.066	2.50255e-08	2	EFNA4
1.70641e-15	0.599719	0.013	0.069	1.4583e-11	2	SLC5A4
7.23865e-41	0.587022	0.05	0.219	6.18615e-37	2	DISP1
1.04818e-12	0.586478	0.346	0.639	8.95774e-09	2	COL4A1
1.81198e-17	0.586339	0.016	0.081	1.54852e-13	2	CNFN
2.1439e-69	0.585999	0.127	0.465	1.83217e-65	2	MPND
2.54232e-22	0.584819	0.025	0.114	2.17266e-18	2	GABPA
7.31155e-09	0.584764	0.003	0.028	6.24845e-05	2	COL19A1
9.94366e-07	0.582718	0.057	0.109	0.00849786	2	COL11A1
3.89999e-09	0.581798	0.024	0.068	3.33293e-05	2	CCN4
1.97117e-57	0.578471	0.13	0.434	1.68456e-53	2	DAPL1
1.48693e-28	0.571145	0.028	0.138	1.27073e-24	2	BNIP1
1.55889e-14	0.571064	0.029	0.097	1.33223e-10	2	STBD1
2.20497e-08	0.568281	0.021	0.06	0.000188437	2	SLC2A4
4.97546e-19	0.562835	0.011	0.074	4.25202e-15	2	KCNS1
1.37956e-15	0.560804	0.012	0.065	1.17897e-11	2	RNF32
1.91588e-13	0.560016	0.012	0.06	1.63731e-09	2	UPK3B
7.32178e-19	0.558691	0.022	0.097	6.25719e-15	2	NME5
1.72248e-57	0.555846	0.145	0.469	1.47203e-53	2	FXR2
6.4685e-11	0.553518	0.01	0.049	5.52798e-07	2	ZNF620
3.58393e-23	0.54913	0.022	0.109	3.06283e-19	2	FOXP3
1.31901e-23	0.548791	0.022	0.11	1.12723e-19	2	IQCH
2.47888e-17	0.548347	0.012	0.072	2.11845e-13	2	PANO1
1.14359e-19	0.548238	0.108	0.253	9.77309e-16	2	ABLIM3
1.05152e-38	0.548061	0.054	0.222	8.98625e-35	2	LRATD2
8.98574e-28	0.547863	0.025	0.128	7.67922e-24	2	SLC4A8
5.12346e-14	0.545691	0.01	0.058	4.37851e-10	2	MPZL3
3.16454e-22	0.544681	0.023	0.108	2.70442e-18	2	ROPN1B
7.06764e-46	0.543577	0.043	0.219	6.04e-42	2	RARB
3.08975e-39	0.541335	0.026	0.162	2.6405e-35	2	ARG2
3.6951e-12	0.541001	0.009	0.049	3.15783e-08	2	PPM1L
8.40037e-08	0.539801	0.006	0.032	0.000717896	2	GDNF
4.71838e-32	0.53258	0.026	0.143	4.03232e-28	2	ZNF653
6.11943e-22	0.532561	0.024	0.109	5.22967e-18	2	TMEM182
6.63038e-11	0.531017	0.018	0.064	5.66632e-07	2	LEF1
1.02231e-06	0.529468	0.005	0.026	0.00873666	2	SLC7A7
4.38824e-35	0.52841	0.035	0.17	3.75019e-31	2	TEX14
1.14403e-64	0.527942	0.099	0.392	9.77692e-61	2	YBEY
1.71701e-07	0.527784	0.008	0.033	0.00146736	2	DMC1
1.12512e-17	0.526883	0.013	0.075	9.61532e-14	2	LRRC10B
9.606e-42	0.526701	0.044	0.21	8.20928e-38	2	IDNK
5.72055e-09	0.523852	0.008	0.039	4.88878e-05	2	IFNLR1
8.3865e-08	0.522319	0.008	0.035	0.00071671	2	MAPK15
3.10982e-29	0.518454	0.036	0.157	2.65765e-25	2	ZNF527
3.09426e-27	0.518137	0.037	0.152	2.64435e-23	2	HLX
6.40506e-57	0.516516	0.076	0.319	5.47376e-53	2	TPRN
1.00928e-07	0.515693	0.008	0.034	0.000862527	2	TRGV9
5.6793e-11	0.515	0.04	0.103	4.85353e-07	2	SMAD6
1.16585e-21	0.514264	0.029	0.12	9.96338e-18	2	LRTOMT
5.0139e-07	0.513283	0.008	0.032	0.00428487	2	SLC7A11
6.86984e-46	0.512562	0.051	0.237	5.87097e-42	2	VRK1
5.43801e-43	0.512414	0.042	0.207	4.64733e-39	2	CD3EAP
1.00568e-07	0.510599	0.008	0.034	0.00085945	2	GINS3
1.3014e-32	0.507308	0.032	0.157	1.11217e-28	2	CPLANE2
4.61653e-07	0.506119	0.003	0.024	0.00394529	2	CD80
4.6836e-17	0.506102	0.012	0.069	4.00261e-13	2	TICRR
4.5044e-15	0.505193	0.014	0.069	3.84946e-11	2	DNAJC19
1.45253e-22	0.501301	0.021	0.106	1.24134e-18	2	KLHL25
1.0645e-20	0.500754	0.024	0.106	9.09723e-17	2	PPP1R32
6.80152e-64	0.50007	0.163	0.526	5.81258e-60	2	SGCE
5.74538e-58	0.499084	0.095	0.363	4.91e-54	2	C20orf27
6.52189e-54	0.498873	0.06	0.278	5.57361e-50	2	RAB37
7.72075e-39	0.498613	0.054	0.222	6.59816e-35	2	HOXA10
1.09749e-62	0.496188	0.127	0.444	9.37911e-59	2	GRWD1
1.01845e-06	0.496131	0.005	0.026	0.0087037	2	GALNT14
2.9144e-57	0.494264	0.078	0.325	2.49065e-53	2	GEMIN7
8.75842e-25	0.493777	0.072	0.209	7.48494e-21	2	NEURL1B
2.09072e-12	0.491396	0.011	0.055	1.78673e-08	2	DND1
2.4844e-25	0.491384	0.028	0.128	2.12317e-21	2	BMP2
5.86868e-18	0.491378	0.036	0.12	5.01537e-14	2	P2RY14
2.51215e-17	0.489244	0.031	0.11	2.14689e-13	2	C6orf136
5.72098e-11	0.488721	0.013	0.054	4.88915e-07	2	SERPINI1
4.04017e-11	0.487303	0.01	0.05	3.45273e-07	2	SPOCD1
6.86363e-08	0.48727	0.005	0.028	0.000586566	2	TSACC
4.52013e-68	0.485504	0.083	0.367	3.86291e-64	2	CCL4
2.2842e-14	0.485336	0.012	0.062	1.95207e-10	2	PRR19
6.04144e-31	0.484462	0.032	0.152	5.16302e-27	2	FCHO1
1.61943e-26	0.484076	0.217	0.481	1.38396e-22	2	COL4A2
5.21203e-56	0.483428	0.068	0.299	4.4542e-52	2	RP9
1.74265e-33	0.482462	0.065	0.226	1.48927e-29	2	C5AR1
1.43554e-40	0.481138	0.04	0.198	1.22681e-36	2	MYBL2
4.34446e-44	0.479583	0.047	0.222	3.71277e-40	2	PHLDA2
2.96745e-61	0.47904	0.094	0.371	2.53598e-57	2	POLR1E
2.17698e-25	0.476906	0.025	0.123	1.86045e-21	2	ANKDD1B
6.24372e-26	0.474618	0.023	0.119	5.33588e-22	2	PTTG1
2.65195e-61	0.47243	0.153	0.496	2.26635e-57	2	LILRB2
4.27801e-07	0.465489	0.006	0.03	0.00365599	2	EFNB3
9.23514e-08	0.464943	0.009	0.038	0.000789235	2	PRTFDC1
7.38188e-18	0.4638	0.017	0.084	6.30856e-14	2	SHCBP1
1.74093e-20	0.463738	0.024	0.105	1.4878e-16	2	SLC4A4
4.59084e-74	0.46351	0.115	0.453	3.92333e-70	2	ABCD1
1.53979e-43	0.463048	0.048	0.222	1.3159e-39	2	C1orf56
1.4483e-64	0.46182	0.132	0.461	1.23772e-60	2	GNA12
7.1614e-16	0.46035	0.014	0.072	6.12013e-12	2	PHKA1
1.80831e-10	0.459818	0.037	0.095	1.54538e-06	2	MARC2
9.89435e-55	0.456956	0.065	0.291	8.45571e-51	2	RAB20
5.29988e-66	0.456649	0.065	0.321	4.52928e-62	2	RFWD3
6.23341e-76	0.456601	0.106	0.435	5.32707e-72	2	TRIM39
6.57983e-20	0.454806	0.064	0.176	5.62312e-16	2	FOSL2
1.74718e-32	0.451935	0.027	0.147	1.49314e-28	2	ANKRD53
2.69914e-16	0.451918	0.023	0.09	2.30668e-12	2	NRN1L
4.97448e-18	0.451787	0.011	0.071	4.25119e-14	2	PROM1
1.05034e-43	0.451575	0.193	0.514	8.97621e-40	2	NPDC1
4.98489e-16	0.451205	0.02	0.083	4.26008e-12	2	LILRB4
9.20126e-17	0.450135	0.014	0.074	7.86339e-13	2	RASSF7
2.85518e-07	0.449772	0.012	0.04	0.00244004	2	SPTBN4
5.07985e-13	0.449359	0.017	0.069	4.34124e-09	2	ASGR1
6.85323e-19	0.449128	0.02	0.093	5.85677e-15	2	CST1
1.21896e-19	0.449022	0.089	0.22	1.04172e-15	2	TBX15
1.9598e-16	0.448412	0.021	0.087	1.67485e-12	2	RAB3C
9.25524e-76	0.447011	0.121	0.472	7.90952e-72	2	PHAX
3.91383e-61	0.446035	0.101	0.386	3.34476e-57	2	CD8B
5.38383e-68	0.445001	0.099	0.403	4.60102e-64	2	CD3G
2.67812e-07	0.444214	0.003	0.023	0.00228872	2	SYTL3
1.17361e-18	0.443873	0.018	0.089	1.00297e-14	2	CCDC24
2.00026e-11	0.443462	0.013	0.056	1.70942e-07	2	PRSS27
9.18725e-62	0.443123	0.221	0.639	7.85142e-58	2	CREB1
5.31405e-25	0.440851	0.1	0.26	4.54139e-21	2	ANGPTL4
1.93284e-36	0.440725	0.059	0.226	1.65181e-32	2	TNFAIP8L1
3.60253e-53	0.440525	0.053	0.259	3.07872e-49	2	BATF
1.31511e-21	0.437231	0.079	0.211	1.1239e-17	2	EEPD1
4.45512e-29	0.4356	0.04	0.163	3.80735e-25	2	CARD10
4.68294e-29	0.434109	0.04	0.164	4.00204e-25	2	TMEM150B
1.04258e-26	0.433328	0.033	0.142	8.90987e-23	2	FKTN
4.73532e-19	0.432355	0.017	0.088	4.0468e-15	2	FAM227A
5.33067e-39	0.429575	0.049	0.212	4.55559e-35	2	MPP3
1.0754e-61	0.429151	0.076	0.333	9.1904e-58	2	BRAF
1.52386e-38	0.427694	0.054	0.22	1.30229e-34	2	PKNOX1
2.21765e-47	0.427371	0.111	0.362	1.8952e-43	2	MOCS1
5.36589e-08	0.427323	0.013	0.046	0.000458569	2	ZNF681
2.17369e-11	0.427129	0.014	0.058	1.85764e-07	2	HDX
1.88255e-19	0.426456	0.024	0.103	1.60883e-15	2	DNAJB5
6.46127e-13	0.425575	0.015	0.065	5.5218e-09	2	PPM1H
7.09308e-26	0.421682	0.02	0.113	6.06175e-22	2	ADAMTS6
2.37448e-17	0.421285	0.019	0.086	2.02923e-13	2	THEMIS
1.03617e-13	0.421091	0.01	0.056	8.85513e-10	2	LRRC6
5.14977e-51	0.416503	0.105	0.361	4.40099e-47	2	CXCL9
6.37052e-30	0.41638	0.021	0.126	5.44425e-26	2	TRIM51
8.70125e-41	0.413704	0.064	0.248	7.43608e-37	2	PDE4B
3.15459e-11	0.413297	0.006	0.04	2.69591e-07	2	SMC4
5.9518e-42	0.412622	0.105	0.332	5.08641e-38	2	ADAMTS7
4.45683e-25	0.411899	0.029	0.129	3.80881e-21	2	CSTA
1.07228e-39	0.410077	0.047	0.209	9.16369e-36	2	NUDT8
1.44735e-65	0.409791	0.109	0.413	1.2369e-61	2	CNOT6
2.32177e-10	0.409662	0.014	0.056	1.98418e-06	2	ITIH4
4.43627e-24	0.409152	0.024	0.117	3.79123e-20	2	FOXM1
5.43255e-15	0.408831	0.015	0.071	4.64266e-11	2	CDKN3
1.90303e-52	0.408321	0.076	0.308	1.62633e-48	2	ZNF408
1.66355e-48	0.407655	0.045	0.231	1.42167e-44	2	RELL2
1.88308e-16	0.40621	0.023	0.09	1.60928e-12	2	LIPT2
7.27789e-25	0.405284	0.07	0.206	6.21968e-21	2	PPP1R14A
9.40018e-14	0.404039	0.01	0.056	8.0334e-10	2	KIFC1
7.09063e-23	0.403804	0.01	0.081	6.05966e-19	2	PTPRZ1
2.24422e-25	0.403677	0.023	0.117	1.91791e-21	2	FDXACB1
4.92256e-69	0.402775	0.18	0.574	4.20682e-65	2	ZBTB38
8.96745e-25	0.40148	0.021	0.112	7.66358e-21	2	CDK1
2.89864e-19	0.399861	0.017	0.088	2.47718e-15	2	FZD8
3.80048e-49	0.3998	0.062	0.269	3.24789e-45	2	ASF1B
5.02559e-21	0.399082	0.018	0.094	4.29487e-17	2	ZBTB39
5.59387e-23	0.398797	0.038	0.141	4.78052e-19	2	SRD5A3
1.93292e-17	0.398536	0.02	0.088	1.65188e-13	2	PITPNM3
5.26689e-12	0.398331	0.006	0.044	4.50109e-08	2	LHX2
6.92044e-45	0.397977	0.056	0.243	5.91421e-41	2	MSL3
7.91991e-32	0.395634	0.037	0.165	6.76835e-28	2	ICOS
2.03275e-47	0.394298	0.051	0.239	1.73719e-43	2	HCN3
2.46263e-07	0.392877	0.006	0.031	0.00210456	2	DMRT3
2.48082e-07	0.392071	0.006	0.031	0.00212011	2	CRYBB1
1.41557e-10	0.391947	0.101	0.195	1.20975e-06	2	CAVIN2
1.05979e-10	0.390795	0.02	0.067	9.05697e-07	2	FNDC4
4.01396e-51	0.390569	0.052	0.252	3.43033e-47	2	TMEM241
6.63103e-10	0.390378	0.014	0.054	5.66688e-06	2	C17orf67
1.0136e-11	0.390368	0.006	0.042	8.66222e-08	2	KCNQ5
1.51704e-24	0.389215	0.028	0.125	1.29646e-20	2	ZBTB46
2.89071e-51	0.389102	0.039	0.223	2.4704e-47	2	ZNF280A
3.26718e-56	0.388926	0.05	0.262	2.79213e-52	2	RAB11FIP1
2.22821e-65	0.388898	0.117	0.43	1.90423e-61	2	ORC4
8.89395e-62	0.387016	0.12	0.426	7.60077e-58	2	ELMOD3
5.15196e-50	0.385619	0.068	0.283	4.40287e-46	2	KCTD21
1.21004e-26	0.384607	0.361	0.779	1.0341e-22	2	ALDH2
1.62296e-67	0.38316	0.1	0.403	1.38698e-63	2	CMSS1
9.00688e-15	0.382704	0.055	0.142	7.69728e-11	2	CCL19
1.00828e-17	0.381793	0.01	0.067	8.61674e-14	2	SKOR1
1.19506e-26	0.381581	0.024	0.123	1.0213e-22	2	LRP8
3.5176e-18	0.380005	0.029	0.109	3.00614e-14	2	DAPK2
1.98828e-60	0.379793	0.071	0.319	1.69918e-56	2	ADGRE2
3.76426e-26	0.378663	0.076	0.222	3.21694e-22	2	MMP9
1.01014e-36	0.378537	0.029	0.162	8.63263e-33	2	ATF7IP2
8.63229e-14	0.376674	0.055	0.138	7.37716e-10	2	ASS1
3.08738e-38	0.376244	0.34	0.798	2.63847e-34	2	MYL12B
4.36017e-68	0.376055	0.099	0.402	3.7262e-64	2	NFIL3
1.43159e-29	0.375772	0.025	0.135	1.22343e-25	2	ZNF135
1.33178e-64	0.375718	0.091	0.373	1.13814e-60	2	FEM1C
4.18031e-26	0.375712	0.02	0.112	3.57249e-22	2	GNGT2
1.2959e-22	0.375345	0.019	0.101	1.10748e-18	2	SRSF12
6.5348e-17	0.375219	0.016	0.078	5.58464e-13	2	FAM83D
7.5953e-14	0.375049	0.015	0.067	6.49094e-10	2	AJM1
1.01039e-11	0.374622	0.013	0.058	8.63481e-08	2	C14orf178
8.25434e-75	0.374379	0.138	0.503	7.05416e-71	2	MAP2K4
4.20285e-73	0.373972	0.095	0.406	3.59176e-69	2	UBXN10
1.15323e-27	0.372305	0.031	0.142	9.85554e-24	2	CLCN2
3.63998e-67	0.372056	0.107	0.416	3.11072e-63	2	ATG16L1
9.80135e-07	0.371943	0.021	0.054	0.00837624	2	FOXC1
1.54127e-63	0.371484	0.135	0.464	1.31717e-59	2	CPD
2.04762e-58	0.371068	0.072	0.317	1.7499e-54	2	ZCCHC10
3.21471e-33	0.370148	0.028	0.151	2.74729e-29	2	FDXR
8.76563e-40	0.369649	0.047	0.209	7.49111e-36	2	TONSL
2.63251e-27	0.368894	0.018	0.113	2.24974e-23	2	SYNGR3
2.2975e-21	0.368438	0.016	0.092	1.96344e-17	2	DET1
5.60425e-10	0.367524	0.018	0.062	4.78939e-06	2	SHB
3.61055e-63	0.365142	0.105	0.4	3.08558e-59	2	FCGR1B
8.22258e-78	0.364806	0.167	0.573	7.02702e-74	2	SMUG1
1.6829e-24	0.364707	0.021	0.11	1.43821e-20	2	TBXA2R
8.8053e-16	0.364499	0.04	0.121	7.52501e-12	2	AXIN2
1.1525e-47	0.363357	0.062	0.264	9.84923e-44	2	TK1
2.34893e-47	0.363343	0.058	0.253	2.0074e-43	2	TMUB1
2.97226e-07	0.362581	0.008	0.033	0.00254009	2	TMEM38A
3.26966e-58	0.361185	0.054	0.276	2.79425e-54	2	PDE6G
2.14429e-69	0.360864	0.177	0.573	1.83251e-65	2	NAB2
9.46459e-50	0.359522	0.236	0.619	8.08844e-46	2	ACSL1
1.09147e-17	0.359211	0.009	0.066	9.32771e-14	2	SMIM17
1.2696e-21	0.358277	0.026	0.113	1.085e-17	2	FAHD2B
1.90119e-75	0.357793	0.174	0.582	1.62476e-71	2	BOK
1.6674e-29	0.356159	0.025	0.133	1.42496e-25	2	PNOC
4.289e-33	0.356093	0.025	0.144	3.66538e-29	2	DTL
5.63463e-10	0.355979	0.016	0.058	4.81536e-06	2	SLC6A1
3.66246e-65	0.355978	0.098	0.39	3.12994e-61	2	GATC
2.78542e-74	0.354085	0.118	0.46	2.38042e-70	2	TUSC2
8.69701e-44	0.353844	0.034	0.193	7.43247e-40	2	TRAV13-1
3.80564e-39	0.353359	0.036	0.184	3.2523e-35	2	PRR5
4.77498e-44	0.353351	0.054	0.236	4.0807e-40	2	CDC7
3.27026e-25	0.352381	0.033	0.139	2.79476e-21	2	COX4I2
1.14328e-39	0.351628	0.054	0.223	9.7705e-36	2	IRF5
1.41422e-09	0.350655	0.015	0.054	1.20859e-05	2	SHISAL1
6.91199e-11	0.350542	0.028	0.081	5.90698e-07	2	NID2
2.90963e-85	0.350491	0.122	0.499	2.48657e-81	2	PARG
1.63103e-09	0.349874	0.059	0.126	1.39388e-05	2	PALMD
1.51746e-69	0.349842	0.184	0.586	1.29682e-65	2	STX10
7.68249e-36	0.349716	0.031	0.165	6.56545e-32	2	ADAM28
1.15994e-68	0.348929	0.191	0.597	9.91285e-65	2	PLAT
1.33955e-57	0.348328	0.072	0.313	1.14478e-53	2	GFOD2
1.68796e-56	0.347737	0.099	0.365	1.44253e-52	2	IRF2BP1
6.35574e-12	0.347711	0.009	0.049	5.43162e-08	2	KLRC3
7.54459e-46	0.347402	0.252	0.644	6.44761e-42	2	HIST3H2A
8.69652e-36	0.347391	0.036	0.176	7.43205e-32	2	ATF3
2.03567e-76	0.347384	0.177	0.592	1.73968e-72	2	RNF41
1.19453e-28	0.347036	0.035	0.151	1.02085e-24	2	VPS37A
2.08142e-56	0.345271	0.058	0.279	1.77878e-52	2	HOXA4
3.50462e-39	0.344432	0.039	0.19	2.99505e-35	2	VXN
6.89384e-60	0.344381	0.077	0.331	5.89148e-56	2	GSKIP
8.65367e-12	0.344009	0.007	0.044	7.39542e-08	2	BAIAP3
2.17143e-46	0.343927	0.028	0.185	1.8557e-42	2	FCRLB
3.50661e-38	0.343771	0.14	0.382	2.99674e-34	2	RARRES2
2.25403e-37	0.343582	0.024	0.153	1.92629e-33	2	FAM86C1
2.11386e-15	0.342651	0.012	0.066	1.80651e-11	2	ASB9
1.22357e-37	0.341755	0.258	0.611	1.04567e-33	2	CEBPA
7.28618e-69	0.341408	0.095	0.392	6.22677e-65	2	TMEM51
8.20217e-58	0.341252	0.053	0.272	7.00957e-54	2	CNNM1
1.59495e-65	0.341063	0.076	0.345	1.36304e-61	2	TIRAP
5.51459e-73	0.340766	0.111	0.442	4.71277e-69	2	DNAJB9
1.98147e-16	0.340369	0.023	0.09	1.69336e-12	2	ZNF366
4.84363e-10	0.339724	0.009	0.044	4.13937e-06	2	GOLGA7B
3.80947e-61	0.339635	0.229	0.655	3.25557e-57	2	MAT2B
5.55956e-53	0.338668	0.084	0.326	4.7512e-49	2	FGR
6.73809e-58	0.338356	0.128	0.426	5.75837e-54	2	HIST1H3G
2.47166e-14	0.33827	0.043	0.121	2.11228e-10	2	RPH3AL
6.15388e-72	0.338068	0.139	0.497	5.25911e-68	2	HTRA2
2.58952e-74	0.337357	0.144	0.517	2.21301e-70	2	PRR14
4.85235e-74	0.336871	0.085	0.387	4.14681e-70	2	IFT22
2.9169e-32	0.336285	0.03	0.152	2.49278e-28	2	TMEM88
1.06106e-50	0.334151	0.046	0.237	9.06778e-47	2	BRCA1
1.55629e-09	0.33401	0.009	0.042	1.33e-05	2	SLC47A1
9.65848e-07	0.333996	0.01	0.035	0.00825414	2	UEVLD
2.24902e-58	0.333727	0.085	0.343	1.92201e-54	2	PSD3
5.83751e-55	0.332882	0.061	0.283	4.98874e-51	2	DUS2
9.5864e-22	0.332806	0.014	0.088	8.19253e-18	2	ZSCAN22
1.04547e-21	0.332497	0.024	0.108	8.93459e-18	2	RMDN2
4.61718e-30	0.332076	0.053	0.192	3.94584e-26	2	HECTD2
1.05525e-63	0.330862	0.093	0.376	9.01817e-60	2	ACSL5
2.66419e-53	0.330369	0.236	0.636	2.27682e-49	2	MEGF10
2.85946e-17	0.329934	0.01	0.067	2.44369e-13	2	FCRLA
4.75392e-29	0.328613	0.032	0.148	4.0627e-25	2	PSMC1
4.52818e-62	0.328571	0.048	0.272	3.86979e-58	2	TTC30B
2.24133e-62	0.328521	0.081	0.346	1.91544e-58	2	ZC3HC1
8.10482e-49	0.328456	0.301	0.76	6.92638e-45	2	ARF5
9.59023e-28	0.327908	0.025	0.128	8.19581e-24	2	SLC26A10
2.62952e-56	0.327827	0.052	0.266	2.24719e-52	2	DCAF13
2.84783e-09	0.327736	0.009	0.041	2.43375e-05	2	LAMP3
5.64359e-26	0.326927	0.026	0.126	4.82301e-22	2	LRGUK
7.84551e-25	0.326913	0.021	0.112	6.70477e-21	2	SLC35F2
9.758e-17	0.326063	0.018	0.082	8.33918e-13	2	ZNF77
1.49536e-32	0.326016	0.362	0.807	1.27794e-28	2	SEPTIN8
1.04462e-44	0.32589	0.058	0.246	8.92735e-41	2	SLC16A3
5.91586e-61	0.325761	0.201	0.59	5.05569e-57	2	EPHX1
1.43233e-07	0.324986	0.038	0.084	0.00122407	2	NPR1
2.43592e-65	0.324955	0.076	0.342	2.08174e-61	2	EBP
5.95596e-75	0.324495	0.118	0.46	5.08996e-71	2	GARS
1.51724e-16	0.324354	0.016	0.078	1.29664e-12	2	MTHFD2
1.07951e-56	0.324145	0.084	0.336	9.22553e-53	2	PAIP1
6.18359e-88	0.324105	0.105	0.467	5.28449e-84	2	ZNF101
1.74625e-13	0.32346	0.01	0.056	1.49235e-09	2	RUFY4
3.44252e-42	0.322853	0.049	0.221	2.94198e-38	2	PHLDB3
1.79261e-26	0.32261	0.024	0.124	1.53197e-22	2	AURKA
1.23939e-66	0.322299	0.157	0.518	1.05918e-62	2	ATF5
9.58438e-28	0.322143	0.053	0.185	8.19081e-24	2	ADRB2
4.10323e-66	0.321376	0.065	0.32	3.50662e-62	2	C12orf43
1.04488e-73	0.321223	0.154	0.533	8.92957e-70	2	JMJD1C
4.78434e-16	0.321128	0.043	0.127	4.0887e-12	2	TIE1
1.91265e-19	0.320503	0.028	0.11	1.63455e-15	2	ZNF792
1.03575e-80	0.320476	0.109	0.456	8.85151e-77	2	TBC1D13
6.46618e-35	0.319836	0.041	0.183	5.526e-31	2	PCDHGB3
4.40292e-72	0.319789	0.181	0.589	3.76273e-68	2	POP4
1.57333e-49	0.319668	0.252	0.657	1.34457e-45	2	CD8A
2.10768e-38	0.319558	0.042	0.194	1.80122e-34	2	SELL
4.56709e-31	0.319367	0.04	0.17	3.90304e-27	2	GNRH1
2.41225e-40	0.319298	0.294	0.713	2.06151e-36	2	DTX3L
1.93429e-53	0.319093	0.059	0.275	1.65305e-49	2	ZNF853
2.40075e-20	0.31889	0.023	0.102	2.05168e-16	2	SIGLEC7
6.01064e-59	0.31873	0.068	0.308	5.13669e-55	2	MED26
7.77568e-25	0.318551	0.035	0.141	6.6451e-21	2	OCIAD2
6.01169e-19	0.317575	0.018	0.09	5.13759e-15	2	EFCAB6
2.25834e-09	0.316639	0.008	0.039	1.92997e-05	2	SLC25A33
4.05745e-77	0.315618	0.148	0.528	3.4675e-73	2	CYB5D2
1.43456e-32	0.315141	0.038	0.17	1.22597e-28	2	TRIP13
8.98799e-67	0.314427	0.088	0.372	7.68113e-63	2	TENT4B
2.90907e-31	0.314381	0.06	0.21	2.48609e-27	2	LIMCH1
1.14457e-37	0.313598	0.036	0.18	9.78152e-34	2	TRBC2
1.18658e-18	0.310334	0.024	0.099	1.01405e-14	2	GRID1
2.54974e-34	0.310274	0.035	0.168	2.17901e-30	2	RABEPK
2.96129e-45	0.310177	0.107	0.347	2.53071e-41	2	PDGFB
3.65225e-24	0.31001	0.051	0.17	3.12121e-20	2	CD163L1
1.03935e-75	0.309793	0.161	0.553	8.88228e-72	2	STX11
3.10034e-77	0.309508	0.188	0.617	2.64955e-73	2	CCSER2
1.97988e-84	0.309237	0.143	0.541	1.69201e-80	2	GPN1
2.18571e-08	0.308163	0.005	0.03	0.000186791	2	CCR4
4.03762e-75	0.307809	0.178	0.588	3.45055e-71	2	CHCHD5
5.17151e-52	0.307601	0.05	0.25	4.41957e-48	2	CDK18
1.59598e-65	0.30736	0.095	0.383	1.36392e-61	2	MALT1
2.98066e-12	0.306497	0.01	0.052	2.54727e-08	2	C1QTNF12
1.29996e-30	0.306322	0.03	0.147	1.11094e-26	2	NIPA1
1.35069e-58	0.305794	0.241	0.669	1.1543e-54	2	UBQLN4
3.39849e-60	0.304994	0.081	0.34	2.90435e-56	2	CDT1
9.86625e-24	0.304827	0.024	0.115	8.4317e-20	2	POC1A
1.96673e-10	0.304501	0.017	0.061	1.68077e-06	2	MOXD1
5.88338e-81	0.304267	0.104	0.448	5.02794e-77	2	EIF2S2
1.41423e-07	0.303882	0.008	0.035	0.0012086	2	INSL3
1.05668e-12	0.303568	0.018	0.069	9.0304e-09	2	DYNC2H1
5.03864e-50	0.303505	0.05	0.245	4.30602e-46	2	SLFN13
1.15198e-66	0.303129	0.105	0.408	9.84483e-63	2	CD86
1.16201e-12	0.302885	0.018	0.069	9.93053e-09	2	ERMARD
3.48457e-07	0.302698	0.007	0.031	0.00297791	2	CNTF
1.43237e-53	0.302658	0.058	0.272	1.2241e-49	2	SOX8
5.83265e-59	0.302117	0.074	0.32	4.98458e-55	2	ZNF319
8.04053e-45	0.30206	0.122	0.375	6.87144e-41	2	ABLIM1
1.29888e-15	0.301706	0.014	0.072	1.11002e-11	2	CBLN1
3.06266e-26	0.300948	0.036	0.147	2.61735e-22	2	SEMA6C
1.39198e-35	0.300695	0.029	0.159	1.18958e-31	2	TMEM79
2.61348e-22	0.30068	0.018	0.098	2.23348e-18	2	SERP2
8.0554e-19	0.30067	0.015	0.082	6.88415e-15	2	ARMCX5-GPRASP2
9.72748e-57	0.300636	0.116	0.402	8.31311e-53	2	FLT3LG
3.12199e-11	0.299847	0.462	0.856	2.66806e-07	2	ANP32B
1.32797e-21	0.29962	0.016	0.092	1.13488e-17	2	TEDC2
5.42536e-81	0.299583	0.126	0.494	4.63651e-77	2	CDK5R1
1.20537e-14	0.299573	0.432	0.815	1.03011e-10	2	ARPC1A
5.99568e-37	0.299376	0.047	0.202	5.12391e-33	2	MAPK11
2.35314e-51	0.2989	0.05	0.249	2.01099e-47	2	PRXL2C
2.2949e-25	0.298846	0.016	0.103	1.96123e-21	2	MPHOSPH6
1.31676e-59	0.297908	0.225	0.64	1.1253e-55	2	NIPSNAP1
1.19228e-71	0.297328	0.131	0.479	1.01892e-67	2	COA5
6.86363e-08	0.297272	0.005	0.028	0.000586566	2	TRDJ3
1.58081e-13	0.296405	0.035	0.103	1.35096e-09	2	ARHGEF15
4.43539e-07	0.296252	0.009	0.035	0.00379049	2	RHBDL1
1.02688e-13	0.296096	0.033	0.101	8.77569e-10	2	MN1
3.48577e-79	0.295752	0.14	0.52	2.97893e-75	2	BCL9
3.4905e-55	0.295713	0.27	0.718	2.98299e-51	2	PRXL2A
6.0227e-07	0.295693	0.012	0.04	0.005147	2	C8orf48
5.69668e-63	0.293843	0.078	0.341	4.86838e-59	2	OPN3
1.08918e-31	0.293788	0.251	0.558	9.30816e-28	2	CRYAB
4.88016e-81	0.293691	0.162	0.573	4.17059e-77	2	NSUN4
4.28425e-69	0.292334	0.232	0.688	3.66132e-65	2	STIMATE
6.23351e-56	0.292259	0.057	0.276	5.32715e-52	2	TRIM58
2.1264e-70	0.291939	0.215	0.651	1.81722e-66	2	DOK2
2.4531e-45	0.291631	0.088	0.31	2.09642e-41	2	MORC4
1.12808e-77	0.291243	0.158	0.556	9.6406e-74	2	YTHDC2
5.93362e-31	0.291044	0.104	0.289	5.07087e-27	2	CYP26B1
1.95855e-72	0.290814	0.167	0.558	1.67377e-68	2	INPP5K
2.4839e-60	0.290478	0.076	0.328	2.12274e-56	2	UPP1
4.34189e-21	0.290111	0.031	0.122	3.71058e-17	2	REM1
1.44294e-09	0.289375	0.007	0.038	1.23313e-05	2	ZNRF2
7.42824e-53	0.289078	0.052	0.256	6.34817e-49	2	RTL8B
3.31747e-24	0.28882	0.02	0.108	2.83511e-20	2	ARIH2OS
4.97892e-65	0.288435	0.107	0.408	4.25499e-61	2	TBX3
2.22652e-09	0.288121	0.008	0.039	1.90278e-05	2	QRICH2
3.47499e-74	0.287699	0.08	0.376	2.96973e-70	2	GCH1
7.89942e-69	0.287633	0.09	0.382	6.75084e-65	2	POMK
1.4833e-25	0.287506	0.143	0.338	1.26763e-21	2	ID1
4.84301e-41	0.286704	0.034	0.185	4.13884e-37	2	BFSP1
1.99606e-28	0.286646	0.374	0.811	1.70584e-24	2	PSMF1
2.42631e-59	0.286369	0.095	0.366	2.07352e-55	2	ABHD18
4.54799e-14	0.286349	0.013	0.065	3.88671e-10	2	ADRA1B
1.53054e-68	0.286208	0.192	0.599	1.308e-64	2	FAM168B
6.56453e-74	0.285959	0.096	0.411	5.61004e-70	2	MORN2
8.32633e-36	0.285958	0.127	0.351	7.11568e-32	2	LOXL2
1.10474e-28	0.285296	0.368	0.8	9.44109e-25	2	NRIP1
7.71322e-51	0.285153	0.066	0.281	6.59172e-47	2	PCCA
6.42947e-66	0.285144	0.192	0.59	5.49463e-62	2	FAAP20
1.29578e-13	0.284807	0.015	0.067	1.10738e-09	2	CCDC153
8.29292e-69	0.283398	0.069	0.338	7.08713e-65	2	DBF4
2.49768e-68	0.283367	0.119	0.443	2.13451e-64	2	MTHFD1L
3.02535e-20	0.283308	0.028	0.113	2.58546e-16	2	PARP2
3.09391e-50	0.282075	0.05	0.246	2.64406e-46	2	POU2F2
1.41904e-13	0.281653	0.024	0.083	1.21272e-09	2	FAM110D
2.5948e-77	0.281472	0.144	0.524	2.21751e-73	2	SNX11
1.04459e-79	0.281317	0.174	0.597	8.92708e-76	2	UBL7
8.25208e-64	0.28073	0.079	0.347	7.05223e-60	2	FAM122C
9.49563e-62	0.280582	0.236	0.665	8.11497e-58	2	SAMD1
3.81033e-28	0.280121	0.023	0.126	3.25631e-24	2	TRIM62
6.39891e-76	0.280052	0.151	0.533	5.46851e-72	2	MRAS
3.7228e-18	0.279958	0.02	0.09	3.18151e-14	2	ANOS1
3.54889e-18	0.279868	0.202	0.399	3.03288e-14	2	CCL14
8.90264e-22	0.279852	0.023	0.106	7.60819e-18	2	MED18
4.84281e-07	0.279793	0.003	0.022	0.00413867	2	TSNAXIP1
1.13768e-79	0.27878	0.126	0.49	9.72266e-76	2	CEP89
4.97119e-27	0.278576	0.038	0.153	4.24838e-23	2	PHETA1
3.53543e-70	0.278523	0.109	0.428	3.02138e-66	2	ZNF333
8.94204e-87	0.278279	0.149	0.559	7.64187e-83	2	ZNF805
4.011e-66	0.277923	0.076	0.344	3.4278e-62	2	BORCS5
9.31991e-20	0.277128	0.017	0.09	7.9648e-16	2	CATSPERD
1.97028e-21	0.277095	0.02	0.099	1.6838e-17	2	TMEM14B
8.74846e-15	7.40718	0.023	0	7.47643e-11	3	IRX4
1.12915e-13	7.16338	0.021	0	9.64976e-10	3	FOXI1
2.89572e-12	6.21435	0.021	0	2.47468e-08	3	CXADR
4.07709e-11	5.79428	0.023	0.001	3.48428e-07	3	MB
3.48243e-09	5.60435	0.021	0.002	2.97608e-05	3	ABHD3
2.33833e-13	5.27601	0.023	0	1.99834e-09	3	OVOL2
2.70868e-14	5.23513	0.028	0.001	2.31484e-10	3	SCN7A
1.42763e-57	5.16889	0.119	0.004	1.22005e-53	3	STAC2
5.49115e-08	5.15091	0.017	0.001	0.000469274	3	CHI3L1
2.58025e-14	5.10898	0.026	0.001	2.20509e-10	3	SCN3B
3.14625e-13	4.85611	0.025	0.001	2.68878e-09	3	CNTN3
3.40422e-07	4.7416	0.017	0.002	0.00290925	3	THAP6
2.64022e-14	4.70883	0.026	0.001	2.25633e-10	3	EPB41L4A
2.37135e-13	4.69787	0.023	0	2.02656e-09	3	ALDH3B2
1.30346e-10	4.48006	0.026	0.002	1.11394e-06	3	HCFC2
3.82441e-12	4.43755	0.023	0.001	3.26834e-08	3	LACRT
4.59862e-11	4.38733	0.021	0.001	3.92998e-07	3	FAT2
2.76908e-09	4.33292	0.026	0.003	2.36645e-05	3	LAMC2
5.26974e-09	4.20538	0.019	0.001	4.50352e-05	3	RSPO1
2.22922e-11	4.19288	0.026	0.002	1.90509e-07	3	ESRP1
3.4553e-07	4.18345	0.017	0.002	0.0029529	3	TMEM87A
6.57257e-10	4.17312	0.026	0.003	5.61692e-06	3	TCEAL7
3.15648e-13	4.14418	0.025	0.001	2.69753e-09	3	FUT2
4.76423e-10	4.09575	0.021	0.001	4.07151e-06	3	PIK3C2G
3.82441e-12	4.07541	0.023	0.001	3.26834e-08	3	TPSD1
4.32496e-11	4.03365	0.023	0.001	3.69611e-07	3	PERP
2.33962e-115	4.02964	0.336	0.035	1.99944e-111	3	MUCL1
5.2549e-09	3.952	0.019	0.001	4.49083e-05	3	CD164L2
1.22715e-18	3.94904	0.049	0.004	1.04872e-14	3	THSD4
7.93753e-07	3.94338	0.019	0.002	0.00678341	3	BBOX1
8.34487e-23	3.84936	0.047	0.002	7.13153e-19	3	KRT23
5.74368e-16	3.84175	0.04	0.003	4.90855e-12	3	FRK
4.6278e-11	3.83312	0.021	0.001	3.95492e-07	3	PRSS22
3.48977e-07	3.82281	0.017	0.002	0.00298236	3	TNN
9.38092e-17	3.8006	0.04	0.003	8.01694e-13	3	EPDR1
1.4519e-13	3.80034	0.032	0.002	1.2408e-09	3	PCDHB2
5.24009e-09	3.78976	0.019	0.001	4.47818e-05	3	C1orf226
1.26783e-17	3.78328	0.04	0.002	1.08348e-13	3	DSG3
5.20195e-41	3.75869	0.091	0.004	4.44559e-37	3	SCGB2A2
3.54861e-16	3.75678	0.042	0.003	3.03265e-12	3	CORIN
1.26193e-101	3.75289	0.253	0.017	1.07844e-97	3	KRT5
1.3375e-11	3.707	0.04	0.006	1.14302e-07	3	RERGL
3.53101e-18	3.70149	0.064	0.009	3.0176e-14	3	ZC2HC1A
2.05087e-08	3.67725	0.021	0.002	0.000175268	3	GRB7
4.37628e-11	3.6763	0.023	0.001	3.73996e-07	3	SERPINA3
2.08148e-11	3.67366	0.032	0.003	1.77883e-07	3	KCNJ15
3.54383e-10	3.62539	0.023	0.002	3.02856e-06	3	TMTC2
8.86522e-15	3.61041	0.036	0.003	7.57621e-11	3	CHMP4C
1.84954e-49	3.60646	0.127	0.009	1.58062e-45	3	GABRP
7.76685e-22	3.59425	0.049	0.003	6.63755e-18	3	NECTIN4
5.83662e-07	3.57482	0.015	0.001	0.00498798	3	CSRP2
4.41826e-15	3.55402	0.053	0.008	3.77584e-11	3	RHOV
5.32952e-09	3.54068	0.019	0.001	4.55461e-05	3	SLC13A2
9.1727e-55	3.49743	0.172	0.019	7.83899e-51	3	PTX3
6.1424e-10	3.49622	0.036	0.006	5.2493e-06	3	PKD1L3
7.11458e-27	3.48781	0.074	0.006	6.08012e-23	3	NPY1R
4.14229e-11	3.47317	0.03	0.003	3.54e-07	3	ZNF808
2.71044e-14	3.4705	0.026	0.001	2.31634e-10	3	DNER
1.13537e-25	3.45919	0.07	0.006	9.70288e-22	3	SPG7
5.06566e-40	3.41847	0.089	0.004	4.32911e-36	3	TNS4
1.86556e-14	3.41692	0.043	0.005	1.59431e-10	3	DGKG
5.35965e-09	3.41161	0.019	0.001	4.58036e-05	3	KLHL4
7.27131e-09	3.40063	0.03	0.005	6.21406e-05	3	CCDC102B
9.45532e-29	3.38628	0.07	0.005	8.08052e-25	3	SBSPON
4.43122e-81	3.38579	0.268	0.034	3.78692e-77	3	KRT14
1.22797e-16	3.38008	0.045	0.004	1.04942e-12	3	FGFR2
4.77519e-48	3.37771	0.144	0.014	4.08087e-44	3	AQP5
2.69215e-46	3.37469	0.142	0.015	2.30071e-42	3	DOCK9
4.44799e-18	3.37416	0.066	0.01	3.80125e-14	3	ANK3
3.29255e-13	3.36193	0.025	0.001	2.81381e-09	3	CFTR
6.61379e-62	3.35538	0.163	0.012	5.65214e-58	3	TRIM29
2.32923e-23	3.33682	0.068	0.007	1.99056e-19	3	FGF2
5.0037e-09	3.32642	0.028	0.004	4.27617e-05	3	EPPK1
3.7378e-25	3.30701	0.059	0.003	3.19432e-21	3	MMP7
2.57701e-12	3.30389	0.038	0.005	2.20231e-08	3	NXPH4
7.48809e-140	3.30078	0.403	0.04	6.39932e-136	3	MGP
1.80135e-14	3.29548	0.04	0.004	1.53943e-10	3	GCSAML
9.13399e-19	3.27105	0.043	0.003	7.80591e-15	3	SH3RF2
7.55322e-21	3.24603	0.047	0.003	6.45498e-17	3	PCDHB14
9.52155e-26	3.22768	0.102	0.017	8.13712e-22	3	UST
1.42561e-18	3.22757	0.078	0.014	1.21833e-14	3	NDUFB5
5.71189e-22	3.22214	0.059	0.005	4.88138e-18	3	SOCS2
3.85257e-61	3.19445	0.183	0.019	3.29241e-57	3	AGTR1
3.6022e-10	3.17733	0.023	0.002	3.07844e-06	3	MAB21L1
9.64855e-31	3.17425	0.081	0.006	8.24565e-27	3	FZD6
9.74281e-13	3.16884	0.032	0.003	8.32621e-09	3	RHCG
1.68028e-13	3.1564	0.042	0.005	1.43597e-09	3	SHISA6
8.04522e-15	3.14501	0.07	0.014	6.87545e-11	3	RAP2C
8.17956e-08	3.13252	0.025	0.003	0.000699025	3	WFDC1
3.91274e-07	3.1281	0.021	0.003	0.00334383	3	TICAM2
2.62722e-12	3.1143	0.038	0.005	2.24522e-08	3	EPCAM
1.76959e-24	3.10957	0.06	0.004	1.51229e-20	3	MYO5C
1.09609e-35	3.10389	0.134	0.02	9.36722e-32	3	CNN1
1.39806e-22	3.10218	0.113	0.025	1.19478e-18	3	ACTG2
4.16952e-47	3.0991	0.198	0.035	3.56327e-43	3	SLC38A2
5.35965e-09	3.09693	0.019	0.001	4.58036e-05	3	DNAJC18
2.94608e-13	3.08826	0.028	0.002	2.51772e-09	3	GPR12
1.06803e-39	3.08728	0.127	0.014	9.12739e-36	3	WWP1
7.10542e-36	3.08611	0.138	0.021	6.07229e-32	3	ANTXR2
6.05461e-45	3.08562	0.11	0.007	5.17427e-41	3	KRT6B
1.67532e-18	3.07003	0.049	0.004	1.43173e-14	3	C5orf46
3.7985e-35	3.04671	0.098	0.009	3.2462e-31	3	AADAC
6.91508e-19	3.0351	0.045	0.003	5.90963e-15	3	SCEL
1.7825e-74	3.03473	0.197	0.015	1.52332e-70	3	DSP
2.90828e-19	3.03322	0.068	0.009	2.48542e-15	3	POLI
2.2085e-18	3.02896	0.053	0.005	1.88738e-14	3	STK3
7.52614e-36	3.02856	0.098	0.008	6.43184e-32	3	COL21A1
8.8025e-32	3.0255	0.098	0.011	7.52262e-28	3	RHEX
3.53332e-07	3.02426	0.017	0.002	0.00301957	3	CSDC2
3.35724e-29	3.02175	0.132	0.025	2.8691e-25	3	TWF1
8.96359e-10	3.01906	0.064	0.019	7.66029e-06	3	SOSTDC1
1.72658e-09	3.01534	0.036	0.006	1.47554e-05	3	RASSF10
1.75559e-14	3.01467	0.047	0.006	1.50033e-10	3	ATP6V1C2
1.89612e-11	3.01412	0.042	0.006	1.62042e-07	3	SPDEF
1.70237e-34	3.00388	0.106	0.011	1.45484e-30	3	TNFAIP8L3
1.34102e-07	2.99449	0.042	0.011	0.00114604	3	RAB3IP
6.49071e-18	2.98429	0.104	0.026	5.54696e-14	3	PRKD3
6.48052e-10	2.98067	0.036	0.006	5.53825e-06	3	KCNAB1
1.41676e-26	2.97253	0.112	0.019	1.21076e-22	3	KRT18
2.19296e-15	2.96928	0.042	0.004	1.8741e-11	3	PKHD1L1
5.24399e-09	2.96926	0.028	0.004	4.48151e-05	3	LONRF3
4.6096e-18	2.95636	0.055	0.006	3.93936e-14	3	NTRK3
7.01954e-13	2.95514	0.038	0.004	5.9989e-09	3	GNA14
1.81304e-24	2.94174	0.093	0.014	1.54942e-20	3	DSC2
1.63913e-38	2.93822	0.112	0.011	1.4008e-34	3	OSR1
3.64163e-10	2.9314	0.023	0.002	3.11214e-06	3	HMGCS2
5.70055e-81	2.93023	0.242	0.024	4.87169e-77	3	OMD
2.65302e-18	2.92342	0.102	0.025	2.26728e-14	3	KIAA1109
1.33815e-51	2.91576	0.153	0.015	1.14358e-47	3	PDGFD
1.78872e-07	2.91311	0.023	0.003	0.00152864	3	HMGN5
4.67631e-27	2.91088	0.106	0.017	3.99637e-23	3	TPD52L1
4.34545e-09	2.90198	0.042	0.009	3.71362e-05	3	COL6A6
6.95603e-16	2.90012	0.04	0.003	5.94462e-12	3	PNLIPRP3
2.45157e-38	2.89691	0.115	0.012	2.09511e-34	3	ECSCR
1.06628e-44	2.89163	0.123	0.01	9.11245e-41	3	EGFR
1.54438e-13	2.88503	0.038	0.004	1.31983e-09	3	RB1CC1
3.69946e-22	2.87799	0.06	0.005	3.16156e-18	3	IRF6
3.48213e-20	2.86698	0.095	0.019	2.97583e-16	3	HCN1
2.89452e-35	2.86605	0.117	0.014	2.47365e-31	3	CCN3
3.24271e-23	2.85107	0.106	0.02	2.77122e-19	3	GEM
2.3789e-09	2.84605	0.023	0.002	2.03301e-05	3	FAM83B
1.44007e-10	2.84521	0.026	0.002	1.23068e-06	3	DUOX1
9.28414e-09	2.8397	0.042	0.009	7.93423e-05	3	WWC1
2.55225e-53	2.83076	0.172	0.02	2.18115e-49	3	RAI2
2.19173e-17	2.8269	0.068	0.011	1.87306e-13	3	TMEM237
2.36638e-86	2.82327	0.306	0.043	2.02231e-82	3	SNED1
2.49042e-22	2.81727	0.07	0.008	2.12831e-18	3	VIPR1
9.73357e-09	2.81473	0.032	0.005	8.31831e-05	3	HAS1
1.24654e-95	2.81165	0.312	0.038	1.06529e-91	3	EBF1
6.22777e-11	2.80616	0.049	0.01	5.32225e-07	3	ELF3
2.93368e-43	2.80039	0.146	0.018	2.50712e-39	3	ZEB1
1.02505e-07	2.80001	0.021	0.002	0.000876009	3	TMEM246
3.80706e-10	2.79836	0.043	0.008	3.25351e-06	3	TMED7
4.72341e-29	2.79136	0.14	0.029	4.03662e-25	3	PEAK1
5.06869e-10	2.78573	0.034	0.005	4.3317e-06	3	DDIT4L
3.32248e-08	2.7821	0.055	0.016	0.000283939	3	ZNF790
3.12235e-07	2.76417	0.032	0.007	0.00266836	3	TLR3
3.03451e-16	2.76251	0.051	0.006	2.59329e-12	3	TEK
1.95095e-74	2.762	0.287	0.045	1.66728e-70	3	ITGB4
7.66447e-38	2.75028	0.132	0.017	6.55006e-34	3	APCDD1
2.17355e-11	2.74995	0.032	0.003	1.85751e-07	3	RAB25
7.78859e-36	2.74749	0.115	0.013	6.65613e-32	3	TACSTD2
4.18342e-15	2.74674	0.06	0.01	3.57515e-11	3	MAP1LC3C
5.67717e-174	2.74311	0.703	0.158	4.85171e-170	3	COL5A2
1.7584e-60	2.7378	0.193	0.022	1.50273e-56	3	PPIC
5.05953e-08	2.73313	0.06	0.02	0.000432388	3	ZBTB33
1.94072e-33	2.72747	0.112	0.014	1.65854e-29	3	TBX1
1.7544e-09	2.72352	0.036	0.006	1.49931e-05	3	LAD1
7.25538e-26	2.72003	0.134	0.03	6.20045e-22	3	CPM
3.74168e-14	2.71796	0.038	0.003	3.19764e-10	3	GRHL2
5.23738e-47	2.71774	0.21	0.04	4.47586e-43	3	PIK3R1
3.81044e-12	2.71302	0.076	0.02	3.2564e-08	3	SPINT1
6.13374e-28	2.7127	0.153	0.036	5.24189e-24	3	SEPTIN7
7.71222e-15	2.71249	0.055	0.008	6.59086e-11	3	JCAD
1.39447e-10	2.71179	0.091	0.032	1.19171e-06	3	ATF1
3.54402e-13	2.7115	0.04	0.005	3.02872e-09	3	IGFN1
2.76742e-19	2.70832	0.068	0.009	2.36503e-15	3	HRH1
4.54723e-11	2.7062	0.034	0.004	3.88606e-07	3	HAUS3
3.49299e-09	2.70368	0.045	0.01	2.98511e-05	3	MAP6
3.84151e-09	2.69159	0.021	0.002	3.28296e-05	3	SCNN1G
1.25104e-30	2.68375	0.087	0.008	1.06914e-26	3	ZFPM2
3.3608e-12	2.68025	0.026	0.002	2.87214e-08	3	ENTPD2
5.22232e-17	2.67909	0.081	0.017	4.463e-13	3	EFCC1
4.13773e-86	2.67748	0.335	0.054	3.53611e-82	3	RNASE4
3.72116e-08	2.67346	0.047	0.012	0.000318011	3	FAM114A2
5.82749e-37	2.66504	0.183	0.039	4.98017e-33	3	TUBB2A
2.07318e-09	2.66424	0.042	0.008	1.77174e-05	3	ELL3
1.75854e-110	2.66168	0.473	0.094	1.50285e-106	3	PCSK5
5.76964e-31	2.65723	0.149	0.03	4.93073e-27	3	TFCP2L1
2.12076e-30	2.65692	0.104	0.013	1.8124e-26	3	LGR5
4.31272e-10	2.65387	0.072	0.022	3.68565e-06	3	TMEM138
1.54343e-16	2.65346	0.053	0.006	1.31901e-12	3	BAG2
9.57898e-67	2.65265	0.27	0.045	8.1862e-63	3	OLFML1
1.75133e-62	2.6497	0.253	0.043	1.49668e-58	3	GALNT16
2.63316e-46	2.64527	0.176	0.026	2.2503e-42	3	ISM1
1.95356e-07	2.63976	0.019	0.002	0.00166952	3	GPR173
2.05234e-36	2.63778	0.108	0.011	1.75393e-32	3	RELN
5.02096e-48	2.62627	0.174	0.024	4.29091e-44	3	CA12
3.80342e-08	2.62388	0.026	0.004	0.00032504	3	TMC4
3.47837e-20	2.62174	0.064	0.008	2.97262e-16	3	CNKSR2
1.61056e-23	2.62109	0.066	0.006	1.37639e-19	3	DSC3
4.10006e-25	2.60807	0.087	0.011	3.50391e-21	3	DPP4
3.96618e-15	2.605	0.051	0.007	3.3895e-11	3	ZG16B
6.63076e-09	2.60196	0.017	0.001	5.66665e-05	3	LPAR4
8.70329e-14	2.60003	0.04	0.004	7.43783e-10	3	KCNA1
3.12313e-08	2.59625	0.059	0.018	0.000266903	3	TMTC3
2.17543e-24	2.59485	0.142	0.036	1.85913e-20	3	SCFD1
7.89369e-50	2.59019	0.153	0.016	6.74595e-46	3	CYP4B1
7.93716e-18	2.589	0.149	0.051	6.78309e-14	3	KDELR1
2.01471e-33	2.58483	0.217	0.062	1.72177e-29	3	TMEM30A
1.46783e-07	2.58352	0.032	0.006	0.0012544	3	REST
1.13536e-09	2.58319	0.032	0.005	9.70279e-06	3	TCF23
1.54483e-31	2.58301	0.191	0.05	1.32021e-27	3	MBD2
4.98303e-53	2.58204	0.208	0.033	4.2585e-49	3	ITGBL1
2.42172e-08	2.5802	0.025	0.003	0.00020696	3	PAPPA2
1.22498e-12	2.57678	0.113	0.041	1.04687e-08	3	ATG5
2.89802e-33	2.57635	0.123	0.017	2.47664e-29	3	CDH13
8.52911e-12	2.57447	0.083	0.025	7.28898e-08	3	OSBPL3
1.47637e-07	2.573	0.03	0.006	0.0012617	3	THADA
1.92479e-07	2.57164	0.062	0.022	0.00164492	3	PPP4R3B
1.43691e-13	2.57033	0.045	0.006	1.22798e-09	3	CREB5
4.89724e-09	2.56887	0.049	0.012	4.18518e-05	3	ZNF573
2.2226e-32	2.56815	0.106	0.012	1.89944e-28	3	COL4A5
7.35412e-10	2.56742	0.026	0.003	6.28483e-06	3	NOS1AP
1.68088e-12	2.56353	0.06	0.013	1.43648e-08	3	SMAD9
3.49845e-07	2.56297	0.028	0.005	0.00298978	3	B4GALNT3
2.30732e-20	2.56291	0.072	0.01	1.97184e-16	3	CYP3A5
1.8215e-125	2.56033	0.522	0.102	1.55665e-121	3	FBLN5
7.31539e-14	2.55486	0.06	0.011	6.25174e-10	3	ANO2
2.05705e-87	2.55477	0.321	0.047	1.75795e-83	3	ACKR3
3.40742e-08	2.55466	0.055	0.016	0.000291198	3	PRKCH
3.50762e-15	2.55388	0.057	0.009	2.99761e-11	3	PDE3A
6.14357e-16	2.5484	0.078	0.016	5.25029e-12	3	MAPK9
2.70164e-28	2.54764	0.191	0.055	2.30882e-24	3	MRC1
4.99039e-08	2.54579	0.045	0.012	0.000426479	3	PCDHGB6
1.22483e-25	2.53886	0.153	0.039	1.04674e-21	3	NCOA4
4.34221e-27	2.53855	0.138	0.03	3.71085e-23	3	ITGAM
6.43941e-73	2.53585	0.27	0.04	5.50312e-69	3	USP53
5.77627e-13	2.53077	0.047	0.007	4.9364e-09	3	TNK1
6.07475e-39	2.52291	0.127	0.015	5.19148e-35	3	DIPK2B
7.52401e-13	2.51981	0.049	0.008	6.43002e-09	3	GRHL1
1.29715e-08	2.51898	0.051	0.014	0.000110854	3	KALRN
2.55275e-10	2.51881	0.036	0.005	2.18158e-06	3	EMB
4.21911e-19	2.5176	0.079	0.014	3.60565e-15	3	VIPR2
1.04641e-39	2.51122	0.125	0.014	8.9426e-36	3	GALNT13
1.50021e-16	2.50937	0.059	0.008	1.28208e-12	3	TRIM7
4.94603e-07	2.50724	0.036	0.009	0.00422688	3	SEC22A
8.02455e-131	2.50574	0.522	0.096	6.85778e-127	3	OLFML3
7.09295e-38	2.50535	0.121	0.014	6.06163e-34	3	TENM1
1.7424e-38	2.50076	0.155	0.025	1.48905e-34	3	PDPN
2.88031e-56	2.49788	0.357	0.108	2.46151e-52	3	ABCA9
1.65259e-13	2.49713	0.102	0.032	1.4123e-09	3	C20orf194
2.81993e-22	2.49381	0.13	0.033	2.40991e-18	3	C16orf72
6.28961e-16	2.49314	0.087	0.02	5.3751e-12	3	F8A1
5.56163e-24	2.49259	0.102	0.018	4.75297e-20	3	TSPAN18
1.45947e-12	2.48292	0.064	0.014	1.24726e-08	3	MCOLN3
2.33521e-39	2.48154	0.168	0.03	1.99567e-35	3	JAM2
6.15934e-15	2.48048	0.053	0.008	5.26377e-11	3	MSRB3
2.57986e-07	2.47702	0.036	0.008	0.00220474	3	ZMYM4
1.11548e-08	2.47387	0.034	0.006	9.53289e-05	3	NUS1
1.91307e-70	2.47312	0.234	0.028	1.63491e-66	3	F10
4.67915e-14	2.47068	0.07	0.015	3.9988e-10	3	EVA1C
3.7326e-14	2.4675	0.038	0.003	3.18988e-10	3	AR
2.21411e-23	2.45689	0.07	0.007	1.89217e-19	3	PDK4
6.94897e-20	2.45652	0.055	0.005	5.93859e-16	3	S100P
3.28188e-13	2.45404	0.025	0.001	2.80469e-09	3	SPTSSB
5.07718e-86	2.45051	0.378	0.073	4.33896e-82	3	AKR1C1
1.3432e-10	2.44645	0.059	0.014	1.1479e-06	3	CTTNBP2NL
3.8752e-09	2.44479	0.043	0.009	3.31174e-05	3	SNX16
2.99064e-15	2.43784	0.045	0.005	2.5558e-11	3	ZDHHC15
3.57553e-19	2.43414	0.115	0.03	3.05565e-15	3	IGIP
5.81644e-08	2.43295	0.017	0.001	0.000497073	3	TTC6
7.49218e-183	2.43241	0.955	0.417	6.40281e-179	3	DPT
1.01133e-73	2.42627	0.316	0.056	8.64283e-70	3	PCOLCE2
9.28008e-14	2.42565	0.049	0.007	7.93075e-10	3	FLT4
1.51438e-10	2.42071	0.062	0.016	1.29419e-06	3	RBP5
3.38153e-93	2.41929	0.476	0.122	2.88986e-89	3	CLIC4
4.13292e-22	2.41307	0.151	0.044	3.532e-18	3	DNAJC3
5.75903e-15	2.41019	0.068	0.013	4.92167e-11	3	ARHGAP8
1.09481e-170	2.40991	0.87	0.339	9.35624e-167	3	THY1
3.79158e-19	2.40532	0.1	0.022	3.24028e-15	3	CALCRL
1.60811e-12	2.40383	0.07	0.017	1.37429e-08	3	ANO10
7.76753e-10	2.4022	0.038	0.006	6.63814e-06	3	MTMR1
1.00971e-107	2.40027	0.369	0.048	8.62902e-104	3	ANGPTL1
1.95946e-21	2.3997	0.115	0.026	1.67456e-17	3	SHOX2
1.32679e-13	2.39244	0.076	0.018	1.13388e-09	3	HSP90B1
1.58623e-08	2.38862	0.076	0.027	0.000135559	3	CSNK1G3
4.85584e-56	2.38588	0.251	0.048	4.1498e-52	3	MATN2
5.22265e-107	2.37805	0.431	0.074	4.46327e-103	3	OSR2
6.15465e-145	2.3757	0.543	0.089	5.25976e-141	3	OGN
2.04362e-11	2.3746	0.059	0.013	1.74648e-07	3	ADAMTS9
2.20273e-22	2.3741	0.078	0.01	1.88246e-18	3	CP
5.39521e-33	2.3716	0.216	0.061	4.61074e-29	3	COL4A4
4.56604e-19	2.37092	0.089	0.017	3.90214e-15	3	EML1
2.21741e-15	2.37043	0.074	0.015	1.895e-11	3	GPRC5A
1.28563e-14	2.36727	0.068	0.014	1.0987e-10	3	NDRG4
8.36296e-30	2.36415	0.225	0.073	7.14699e-26	3	RBM25
4.35474e-28	2.3633	0.13	0.025	3.72156e-24	3	KIT
7.25052e-10	2.36013	0.085	0.03	6.19629e-06	3	PLAU
1.18637e-14	2.3595	0.062	0.011	1.01387e-10	3	GANC
7.89687e-75	2.3586	0.397	0.099	6.74866e-71	3	RECK
1.3589e-07	2.35706	0.06	0.02	0.00116132	3	MTM1
2.93966e-190	2.35617	0.924	0.341	2.51223e-186	3	HTRA1
7.87779e-09	2.35345	0.03	0.005	6.73236e-05	3	CADPS
1.65671e-194	2.35238	0.928	0.344	1.41582e-190	3	C3
2.37351e-52	2.35017	0.338	0.101	2.0284e-48	3	TMEM176A
6.50164e-154	2.34878	0.764	0.23	5.5563e-150	3	F13A1
2.21161e-07	2.34592	0.066	0.024	0.00189004	3	KDELR3
6.75597e-11	2.34193	0.043	0.008	5.77365e-07	3	XG
3.06346e-20	2.33883	0.068	0.009	2.61804e-16	3	CLSTN2
6.36241e-20	2.33235	0.112	0.026	5.43731e-16	3	SH3BGRL2
2.74527e-45	2.33146	0.191	0.033	2.34611e-41	3	TFPI
5.14367e-24	2.33018	0.089	0.013	4.39578e-20	3	NOSTRIN
1.50542e-20	2.32999	0.123	0.031	1.28653e-16	3	ITGA1
3.2603e-221	2.32524	0.998	0.59	2.78625e-217	3	CXCL14
4.58048e-09	2.32347	0.087	0.033	3.91448e-05	3	PRDX3
1.61737e-14	2.31954	0.1	0.029	1.3822e-10	3	SERPINB1
8.80758e-08	2.3185	0.059	0.019	0.000752696	3	TBC1D8B
6.26518e-17	2.31794	0.125	0.038	5.35422e-13	3	SP1
1.41241e-11	2.31679	0.028	0.002	1.20705e-07	3	HACD4
3.74511e-15	2.31514	0.057	0.009	3.20057e-11	3	SENP7
7.44271e-10	2.3117	0.089	0.032	6.36054e-06	3	MARCH7
1.04952e-08	2.31073	0.053	0.014	8.96919e-05	3	SNX7
3.19139e-94	2.30614	0.416	0.081	2.72736e-90	3	HAND2
1.97208e-21	2.3059	0.078	0.011	1.68534e-17	3	ANKS1B
5.85533e-43	2.30566	0.236	0.057	5.00397e-39	3	FAP
6.91182e-19	2.29943	0.153	0.051	5.90684e-15	3	OXR1
6.69908e-29	2.29898	0.183	0.05	5.72504e-25	3	TWSG1
4.50017e-10	2.29594	0.078	0.025	3.84584e-06	3	USP12
5.21371e-20	2.29038	0.142	0.042	4.45564e-16	3	SYNM
4.97478e-74	2.28328	0.357	0.076	4.25145e-70	3	ANTXR1
3.87576e-19	2.28145	0.081	0.014	3.31222e-15	3	FHL5
5.25597e-129	2.28038	0.618	0.151	4.49176e-125	3	ABI3BP
2.47572e-17	2.27871	0.098	0.024	2.11575e-13	3	RGCC
5.67187e-48	2.27179	0.212	0.038	4.84718e-44	3	IRX1
3.73178e-11	2.26698	0.038	0.005	3.18918e-07	3	CNR1
2.14943e-57	2.26498	0.329	0.084	1.8369e-53	3	CLDN5
6.94438e-188	2.26415	0.953	0.404	5.93467e-184	3	SLIT3
7.5411e-09	2.26398	0.064	0.02	6.44462e-05	3	NEBL
1.55065e-12	2.2599	0.045	0.007	1.32518e-08	3	UBE2Q2
3.57423e-173	2.25709	0.905	0.372	3.05453e-169	3	PLPP3
2.49493e-08	2.25301	0.025	0.003	0.000213217	3	SIGLEC6
3.14583e-32	2.25025	0.119	0.017	2.68843e-28	3	PTPRU
1.62215e-40	2.24946	0.17	0.029	1.38629e-36	3	MASP1
3.52891e-09	2.24705	0.032	0.005	3.0158e-05	3	TCFL5
5.0446e-08	2.24385	0.102	0.046	0.000431112	3	SERINC3
2.50407e-10	2.24183	0.076	0.023	2.13998e-06	3	ZNF514
1.60661e-10	2.23921	0.034	0.005	1.37301e-06	3	AJAP1
1.22416e-98	2.2378	0.503	0.125	1.04617e-94	3	GPC3
3.24544e-100	2.23637	0.456	0.094	2.77356e-96	3	LPAR1
8.58625e-201	2.23244	0.996	0.537	7.33781e-197	3	FBLN1
7.21645e-09	2.22911	0.091	0.036	6.16718e-05	3	RBM33
1.85452e-18	2.22752	0.064	0.009	1.58487e-14	3	PGM5
1.82287e-94	2.22453	0.41	0.076	1.55783e-90	3	ITIH5
3.20888e-21	2.22247	0.144	0.041	2.74231e-17	3	MMRN2
2.10795e-34	2.22159	0.191	0.045	1.80145e-30	3	IRX2
4.71838e-21	2.22099	0.102	0.021	4.03233e-17	3	HSPB8
9.11784e-12	2.22065	0.066	0.016	7.79211e-08	3	YPEL2
9.28073e-17	2.2204	0.068	0.011	7.93131e-13	3	SSPN
4.02106e-07	2.22009	0.021	0.003	0.0034364	3	LMX1B
2.26216e-08	2.21855	0.03	0.005	0.000193324	3	ZNF391
4.4542e-48	2.21681	0.284	0.075	3.80656e-44	3	C1QTNF3
1.97164e-13	2.21597	0.038	0.004	1.68496e-09	3	CALML5
1.57755e-39	2.21499	0.161	0.026	1.34817e-35	3	RIPOR3
8.10023e-17	2.21306	0.112	0.031	6.92245e-13	3	ZC3H7A
3.16892e-60	2.21169	0.221	0.031	2.70816e-56	3	VIT
3.27002e-86	2.20918	0.597	0.234	2.79456e-82	3	DAB2
1.10696e-12	2.20886	0.059	0.012	9.46007e-09	3	GPR34
2.27615e-22	2.2026	0.157	0.046	1.9452e-18	3	CDON
4.20424e-177	2.20099	0.862	0.25	3.59295e-173	3	PI16
9.08792e-08	2.19975	0.108	0.051	0.000776653	3	RAB3IL1
1.14795e-07	2.19816	0.087	0.037	0.000981035	3	PLCL2
1.4183e-12	2.19359	0.036	0.004	1.21208e-08	3	NMNAT2
8.43934e-26	2.19142	0.115	0.021	7.21226e-22	3	MAOA
2.5206e-103	2.1854	0.537	0.137	2.1541e-99	3	ANPEP
1.07874e-12	2.1831	0.043	0.006	9.21888e-09	3	MAOB
1.04806e-178	2.17784	0.858	0.247	8.95671e-175	3	PPL
4.42054e-09	2.17717	0.098	0.04	3.7778e-05	3	PPP1R21
9.73022e-15	2.1649	0.049	0.006	8.31544e-11	3	ANXA3
1.93074e-13	2.15658	0.047	0.007	1.65001e-09	3	OSMR
2.57782e-13	2.15363	0.161	0.07	2.203e-09	3	PTPN13
1.85386e-07	2.14996	0.051	0.016	0.00158431	3	MAP7
1.21424e-135	2.1497	0.645	0.154	1.03769e-131	3	PDGFRA
2.8291e-17	2.14885	0.2	0.088	2.41775e-13	3	KIF5B
8.13723e-22	2.14861	0.208	0.079	6.95408e-18	3	SPPL2A
4.07372e-51	2.14806	0.272	0.062	3.4814e-47	3	LMOD1
7.47354e-08	2.14649	0.047	0.013	0.000638689	3	SMAD1
1.63773e-20	2.14424	0.127	0.033	1.3996e-16	3	IL33
1.92159e-07	2.14185	0.019	0.002	0.00164219	3	INSIG2
5.47805e-24	2.14096	0.112	0.022	4.68154e-20	3	KITLG
1.95149e-87	2.13879	0.359	0.061	1.66774e-83	3	ABCA8
6.81811e-24	2.13711	0.119	0.025	5.82675e-20	3	TGFB3
4.20971e-12	2.13432	0.079	0.022	3.59761e-08	3	ITGB8
3.77159e-230	2.13428	1	0.893	3.2232e-226	3	DCN
2.07065e-17	2.13395	0.093	0.021	1.76957e-13	3	CACNB4
6.99875e-58	2.13186	0.338	0.087	5.98114e-54	3	CGNL1
5.06718e-10	2.13104	0.059	0.015	4.33041e-06	3	ADAM32
3.13511e-11	2.13093	0.117	0.047	2.67926e-07	3	NCALD
3.88946e-14	2.13008	0.078	0.018	3.32393e-10	3	GATA2
8.9408e-17	2.12979	0.078	0.015	7.64081e-13	3	CYYR1
2.82707e-47	2.12831	0.185	0.028	2.41601e-43	3	CMA1
1.792e-08	2.12818	0.053	0.015	0.000153144	3	EPB41L5
4.46724e-81	2.12695	0.382	0.078	3.8177e-77	3	SCARA3
3.54749e-21	2.12324	0.093	0.017	3.03169e-17	3	PAPPA
4.65417e-12	2.12247	0.072	0.019	3.97746e-08	3	EPHA3
3.30088e-30	2.12097	0.193	0.052	2.82093e-26	3	MYL12A
1.40262e-12	2.11636	0.102	0.034	1.19868e-08	3	TMEM64
2.65945e-12	2.11552	0.098	0.032	2.27277e-08	3	NPR3
3.21977e-12	2.11486	0.064	0.015	2.75162e-08	3	MMP23B
2.1343e-31	2.11387	0.255	0.089	1.82397e-27	3	TMEM123
3.19803e-15	2.11351	0.085	0.02	2.73304e-11	3	RCN1
1.54065e-173	2.1131	0.879	0.283	1.31664e-169	3	MFAP4
2.1424e-08	2.10612	0.083	0.032	0.000183089	3	EEF1AKMT1
6.04697e-39	2.09434	0.161	0.026	5.16774e-35	3	PPP1R1B
5.5363e-25	2.09011	0.21	0.073	4.73132e-21	3	STK38
3.05019e-29	2.09	0.234	0.079	2.6067e-25	3	C12orf75
1.16594e-13	2.08904	0.106	0.034	9.96411e-10	3	IL3RA
3.82199e-42	2.08832	0.38	0.157	3.26628e-38	3	SMG1
4.90212e-26	2.08749	0.164	0.044	4.18936e-22	3	CLEC12A
7.07688e-08	2.08592	0.032	0.006	0.00060479	3	RAPH1
8.14353e-85	2.08585	0.493	0.137	6.95946e-81	3	PRELP
7.23855e-51	2.08434	0.25	0.052	6.18607e-47	3	TBX18
3.43539e-08	2.08342	0.066	0.022	0.000293588	3	CWF19L2
1.50632e-08	2.08243	0.095	0.039	0.00012873	3	YTHDF1
1.53924e-07	2.08138	0.032	0.006	0.00131544	3	C2orf72
2.83239e-15	2.08023	0.087	0.021	2.42056e-11	3	GPC6
1.36376e-21	2.07993	0.24	0.104	1.16547e-17	3	PPP1CB
1.63888e-169	2.07609	0.949	0.424	1.40058e-165	3	CCN5
6.24645e-76	2.07528	0.524	0.184	5.33822e-72	3	ADM
2.25047e-07	2.07274	0.038	0.009	0.00192325	3	AK4
2.4735e-37	2.06602	0.176	0.034	2.11385e-33	3	ZNF521
2.28675e-24	2.06301	0.146	0.036	1.95425e-20	3	CRLF1
4.87138e-197	2.05718	0.998	0.621	4.16308e-193	3	FBLN2
5.32537e-11	2.05276	0.085	0.027	4.55106e-07	3	GPR176
1.38173e-125	2.05009	0.832	0.42	1.18083e-121	3	SERPING1
1.22324e-10	2.04742	0.038	0.006	1.04538e-06	3	MAS1L
7.68456e-34	2.04594	0.202	0.052	6.56722e-30	3	ALDH1L2
7.04e-18	2.03627	0.129	0.038	6.01639e-14	3	FBXL3
3.00783e-38	2.03398	0.331	0.126	2.57049e-34	3	OGFRL1
2.87561e-09	2.03193	0.055	0.014	2.4575e-05	3	PYGO1
3.21202e-13	2.03065	0.093	0.027	2.74499e-09	3	CFI
1.0093e-32	2.02636	0.138	0.023	8.62545e-29	3	MATN4
1.72169e-15	2.02384	0.155	0.06	1.47136e-11	3	TFE3
3.42908e-14	2.02371	0.113	0.037	2.93049e-10	3	SIN3B
1.0749e-07	2.02336	0.064	0.022	0.000918614	3	HHEX
1.38936e-07	2.02256	0.036	0.008	0.00118735	3	RNF19A
1.68455e-14	2.02252	0.149	0.059	1.43962e-10	3	CD164
4.9312e-07	2.01939	0.129	0.07	0.00421421	3	FGFBP2
1.08974e-10	2.015	0.079	0.025	9.31293e-07	3	S100A3
4.07302e-75	2.01476	0.376	0.083	3.48081e-71	3	NEGR1
7.84628e-13	2.01334	0.093	0.028	6.70543e-09	3	MINDY4
3.67761e-10	2.00944	0.078	0.025	3.14288e-06	3	TMCO3
5.85224e-83	2.00619	0.531	0.173	5.00132e-79	3	PROS1
3.42576e-09	2.00564	0.053	0.014	2.92765e-05	3	KCP
5.9732e-09	2.00363	0.028	0.004	5.1047e-05	3	DLG2
9.39034e-13	2.00308	0.106	0.036	8.02499e-09	3	SLC46A3
1.93349e-08	2.00121	0.028	0.004	0.000165236	3	RGS13
1.93574e-36	2.0012	0.253	0.075	1.65428e-32	3	CCDC3
6.53173e-41	2.00046	0.157	0.023	5.58202e-37	3	MEOX2
2.00988e-34	1.99693	0.142	0.023	1.71765e-30	3	SNCAIP
8.44521e-08	1.99603	0.068	0.024	0.000721727	3	RAB12
6.25972e-199	1.99571	1	0.667	5.34956e-195	3	TNXB
8.4648e-18	1.9953	0.142	0.046	7.23402e-14	3	RASSF2
1.45126e-11	1.99403	0.093	0.03	1.24025e-07	3	RETREG1
2.2806e-21	1.99216	0.21	0.081	1.949e-17	3	FABP5
9.47693e-12	1.98768	0.159	0.074	8.09898e-08	3	KIAA1671
6.55789e-11	1.98754	0.042	0.007	5.60438e-07	3	SEC14L5
8.96427e-07	1.98157	0.098	0.048	0.00766086	3	KAT6B
8.97305e-11	1.98057	0.112	0.044	7.66837e-07	3	DCUN1D4
2.15996e-155	1.98057	0.938	0.495	1.8459e-151	3	CFH
4.28358e-12	1.98006	0.113	0.042	3.66075e-08	3	TNRC6A
2.64437e-15	1.97561	0.093	0.024	2.25988e-11	3	EFNB1
1.18911e-08	1.97424	0.053	0.014	0.000101621	3	PPP1R14C
5.03596e-42	1.97373	0.24	0.058	4.30374e-38	3	FAM180A
4.95865e-12	1.97203	0.257	0.157	4.23766e-08	3	SLC12A2
5.18214e-34	1.97053	0.251	0.079	4.42866e-30	3	VWA5A
2.45416e-22	1.96957	0.115	0.025	2.09732e-18	3	PREX2
6.87895e-27	1.96957	0.098	0.014	5.87875e-23	3	TSPAN8
2.71382e-18	1.9685	0.1	0.023	2.31923e-14	3	ADRA2A
2.55961e-10	1.96557	0.132	0.06	2.18744e-06	3	DICER1
8.11438e-12	1.96405	0.042	0.006	6.93455e-08	3	LRRC17
1.77692e-09	1.96305	0.104	0.043	1.51856e-05	3	TMEM131
7.72737e-11	1.95954	0.134	0.059	6.60381e-07	3	VPS26A
1.94097e-16	1.95492	0.117	0.035	1.65875e-12	3	DOK4
2.14367e-111	1.95464	0.667	0.219	1.83198e-107	3	C1QTNF1
4.87099e-07	1.95387	0.062	0.023	0.00416275	3	VAMP4
5.98413e-10	1.94902	0.093	0.034	5.11404e-06	3	TERF2
4.60014e-76	1.94891	0.416	0.103	3.93128e-72	3	PDGFRL
3.51602e-11	1.94779	0.066	0.017	3.00479e-07	3	PKP1
1.26203e-16	1.94705	0.098	0.025	1.07853e-12	3	CACHD1
6.88597e-17	1.94663	0.129	0.04	5.88475e-13	3	DYNLT3
8.58065e-169	1.94612	0.96	0.56	7.33303e-165	3	C1S
2.02903e-16	1.94551	0.098	0.025	1.73401e-12	3	NAALAD2
2.0917e-33	1.94496	0.176	0.038	1.78757e-29	3	IGDCC4
1.91122e-14	1.94091	0.095	0.026	1.63333e-10	3	SESN1
6.26223e-23	1.93809	0.161	0.047	5.3517e-19	3	NUCB2
5.88048e-08	1.93544	0.017	0.001	0.000502546	3	CLDN8
7.01932e-17	1.93543	0.132	0.042	5.99871e-13	3	SLC41A2
1.86985e-12	1.93375	0.072	0.018	1.59798e-08	3	LNX1
4.07208e-10	1.93195	0.093	0.034	3.48e-06	3	AGFG1
1.15212e-11	3.58117	0.036	0.004	9.846e-08	4	C12orf74
1.61774e-10	3.48063	0.027	0.002	1.38252e-06	4	NOX5
2.10849e-09	3.18878	0.022	0.001	1.80192e-05	4	ACSL6
7.00892e-17	2.74026	0.041	0.002	5.98983e-13	4	EPB42
1.62628e-08	2.2595	0.022	0.002	0.000138982	4	CHGB
6.46982e-09	2.09351	0.044	0.008	5.52911e-05	4	OXTR
4.17711e-09	2.03522	0.03	0.004	3.56976e-05	4	FAM166A
5.12614e-10	2.02365	0.038	0.005	4.3808e-06	4	IFIT1B
1.90276e-26	1.99089	0.107	0.014	1.6261e-22	4	SLC4A1
9.49655e-36	1.94333	0.148	0.02	8.11575e-32	4	SPIB
2.11988e-09	1.87631	0.041	0.007	1.81165e-05	4	NELL1
8.04574e-07	1.84662	0.038	0.009	0.00687589	4	CD2
3.29373e-10	1.81256	0.041	0.006	2.81482e-06	4	OTOF
5.48191e-09	1.78876	0.041	0.007	4.68484e-05	4	ADGRB1
1.11217e-13	1.72164	0.057	0.009	9.50463e-10	4	ADGRF3
7.36227e-09	1.59575	0.049	0.01	6.2918e-05	4	MCF2L2
4.88929e-11	1.58077	0.055	0.01	4.17839e-07	4	NCR3
4.48747e-16	1.56335	0.101	0.022	3.83499e-12	4	GTF2A2
1.18168e-26	1.54216	0.167	0.036	1.00986e-22	4	CASKIN1
5.17553e-08	1.532	0.055	0.014	0.000442301	4	TRBV7-3
2.44808e-17	1.51534	0.112	0.025	2.09213e-13	4	FAAH2
5.11479e-22	1.51381	0.079	0.009	4.3711e-18	4	CXCR5
1.02506e-10	1.51315	0.063	0.014	8.76016e-07	4	PAX5
2.38175e-39	1.48204	0.23	0.047	2.03544e-35	4	ZBTB32
8.70295e-17	1.4616	0.109	0.025	7.43754e-13	4	MS4A1
1.78735e-08	1.45578	0.06	0.016	0.000152747	4	LCTL
1.36782e-09	1.44606	0.066	0.016	1.16894e-05	4	FMN2
6.90558e-11	1.43515	0.049	0.008	5.90151e-07	4	KIR2DL4
2.59654e-29	1.39524	0.175	0.036	2.219e-25	4	ACCSL
8.69503e-12	1.38129	0.087	0.023	7.43078e-08	4	FRMPD3
3.65426e-09	1.37941	0.049	0.01	3.12293e-05	4	OPN4
5.441e-15	1.3789	0.079	0.015	4.64988e-11	4	TRAJ57
8.34478e-11	1.36523	0.052	0.009	7.13145e-07	4	NTRK1
3.10748e-12	1.33174	0.117	0.036	2.65565e-08	4	CCL17
2.0329e-08	1.2704	0.074	0.022	0.000173732	4	FTCD
2.99851e-14	1.26253	0.093	0.021	2.56252e-10	4	OPRL1
1.0615e-25	1.25413	0.15	0.031	9.07155e-22	4	RINL
1.84793e-07	1.24161	0.033	0.006	0.00157924	4	PTGDR2
1.45314e-27	1.23564	0.18	0.041	1.24185e-23	4	HRK
3.19551e-28	1.2327	0.169	0.035	2.73088e-24	4	CCR7
5.05031e-21	1.22343	0.148	0.036	4.31599e-17	4	LCE2A
1.7013e-08	1.21845	0.055	0.013	0.000145393	4	SLC22A31
5.28768e-12	1.207	0.082	0.02	4.51885e-08	4	SCN8A
1.50018e-08	1.19566	0.03	0.004	0.000128206	4	BFSP2
6.68805e-09	1.18611	0.052	0.011	5.71561e-05	4	SYCE1L
8.44875e-13	1.17728	0.085	0.02	7.22031e-09	4	FAXC
3.77551e-09	1.17717	0.052	0.011	3.22655e-05	4	TMEM88B
1.02389e-11	1.15876	0.074	0.017	8.75013e-08	4	LAMP3
4.53979e-37	1.13804	0.303	0.084	3.8797e-33	4	C17orf97
9.27232e-19	1.13798	0.148	0.039	7.92412e-15	4	CYSRT1
9.23808e-19	1.13483	0.131	0.032	7.89486e-15	4	SCML4
2.66799e-17	1.13344	0.055	0.005	2.28006e-13	4	CLEC17A
1.51514e-07	1.13327	0.049	0.012	0.00129484	4	CDHR1
1.19719e-11	1.13088	0.068	0.015	1.02312e-07	4	SCG5
1.48527e-10	1.12234	0.093	0.027	1.26931e-06	4	CCDC190
2.56714e-08	1.1089	0.038	0.007	0.000219388	4	LRR1
8.73547e-17	1.10657	0.12	0.03	7.46533e-13	4	ANKRD24
1.39779e-21	1.10415	0.167	0.043	1.19455e-17	4	ODF3L2
3.36506e-10	1.07324	0.066	0.015	2.87578e-06	4	ASCL2
1.42139e-26	1.06197	0.164	0.035	1.21472e-22	4	CD19
1.26799e-19	1.06149	0.104	0.019	1.08363e-15	4	LTA
5.4062e-30	1.06024	0.219	0.055	4.62014e-26	4	DUSP9
7.95744e-11	1.03757	0.104	0.032	6.80042e-07	4	A1BG
8.0316e-82	1.02981	0.995	0.441	6.8638e-78	4	KIAA1211
2.62467e-39	1.01428	0.311	0.082	2.24304e-35	4	TIFAB
1.1564e-07	1.01161	0.038	0.007	0.000988264	4	ZBED2
4.90611e-16	1.00909	0.101	0.022	4.19276e-12	4	NPW
5.84256e-23	1.00226	0.158	0.037	4.99305e-19	4	POLQ
8.35076e-38	1.00176	0.309	0.084	7.13656e-34	4	VAX2
7.49596e-16	0.992281	0.09	0.018	6.40605e-12	4	MSX2
2.86791e-11	0.987976	0.096	0.027	2.45092e-07	4	TRAJ50
6.18264e-41	0.987576	0.333	0.091	5.28368e-37	4	VGF
1.26522e-69	0.986511	0.484	0.117	1.08126e-65	4	CDC20
2.89478e-54	0.982846	0.508	0.154	2.47388e-50	4	GNLY
3.00299e-12	0.980392	0.093	0.024	2.56635e-08	4	TRBV19
5.1029e-12	0.968004	0.077	0.017	4.36094e-08	4	RSPH10B
7.88686e-65	0.966075	0.555	0.159	6.74011e-61	4	SULT4A1
6.86461e-08	0.962448	0.063	0.018	0.000586649	4	DNASE1L2
7.08224e-08	0.961141	0.063	0.018	0.000605248	4	TRBV10-3
2.57901e-07	0.957084	0.038	0.008	0.00220403	4	NR0B1
3.84361e-45	0.956222	0.391	0.113	3.28475e-41	4	CTRL
5.65722e-07	0.954906	0.055	0.016	0.00483466	4	CCL4L2
4.75165e-17	0.952085	0.107	0.023	4.06076e-13	4	NIBAN3
1.20363e-11	0.950821	0.087	0.023	1.02862e-07	4	NUGGC
1.17056e-82	0.948534	0.691	0.197	1.00036e-78	4	GPRIN1
1.29621e-60	0.947527	0.626	0.206	1.10774e-56	4	LTB
6.45569e-39	0.944639	0.216	0.041	5.51704e-35	4	ZNF814
4.64345e-09	0.941081	0.066	0.017	3.96829e-05	4	HPX
6.41343e-45	0.936579	0.333	0.082	5.48092e-41	4	S1PR4
1.44016e-36	0.93199	0.273	0.07	1.23076e-32	4	ABHD12B
5.88828e-13	0.930741	0.087	0.021	5.03212e-09	4	CARMIL3
6.01983e-34	0.927497	0.24	0.059	5.14455e-30	4	CHRNB2
8.46504e-14	0.91867	0.101	0.026	7.23422e-10	4	IQANK1
5.16479e-28	0.91071	0.224	0.06	4.41383e-24	4	LMNTD2
1.3627e-07	0.905986	0.03	0.005	0.00116457	4	CCL25
8.38424e-07	0.903239	0.038	0.009	0.00716517	4	SYTL3
1.06222e-36	0.901634	0.344	0.103	9.07773e-33	4	SLAMF6
2.48068e-16	0.901551	0.145	0.042	2.11999e-12	4	HTRA4
2.74328e-55	0.901267	0.5	0.148	2.34441e-51	4	BICDL1
9.48445e-61	0.900526	0.462	0.119	8.10541e-57	4	BORCS6
3.46536e-13	0.898852	0.085	0.019	2.9615e-09	4	SIGLEC5
3.67749e-35	0.898004	0.311	0.09	3.14278e-31	4	GDF7
4.03591e-10	0.897317	0.06	0.013	3.44908e-06	4	TRBV18
8.14546e-11	0.895876	0.071	0.017	6.96111e-07	4	PKMYT1
3.43223e-11	0.894852	0.096	0.027	2.93318e-07	4	METTL7B
1.51665e-11	0.89056	0.063	0.012	1.29613e-07	4	CXorf40B
7.99407e-49	0.887562	0.459	0.139	6.83173e-45	4	RNF43
3.35622e-09	0.882136	0.066	0.017	2.86823e-05	4	ANK1
2.39225e-13	0.881929	0.12	0.035	2.04442e-09	4	TRAJ4
1.26694e-21	0.88156	0.139	0.031	1.08273e-17	4	FAM163B
5.31828e-17	0.873776	0.096	0.019	4.545e-13	4	POLRMT
1.53978e-16	0.872189	0.128	0.034	1.3159e-12	4	JSRP1
2.5885e-37	0.868499	0.279	0.071	2.21213e-33	4	TTPA
1.6179e-36	0.86783	0.306	0.086	1.38266e-32	4	GFI1
6.48313e-57	0.867809	0.44	0.118	5.54048e-53	4	UTP14A
5.07126e-30	0.865231	0.21	0.05	4.33389e-26	4	KSR2
1.17051e-66	0.863499	0.503	0.129	1.00032e-62	4	NELL2
4.43948e-30	0.858418	0.24	0.064	3.79398e-26	4	TRAJ41
8.93256e-08	0.856831	0.046	0.011	0.000763377	4	COL19A1
2.02502e-10	0.856586	0.06	0.013	1.73058e-06	4	ANKRD65
5.70599e-10	0.851737	0.077	0.021	4.87634e-06	4	FBXO15
9.57417e-08	0.846967	0.055	0.014	0.000818209	4	STPG4
5.81611e-47	0.845081	0.429	0.125	4.97045e-43	4	PLA2G2D
1.42825e-61	0.840161	0.986	0.444	1.22059e-57	4	OBSCN
3.23642e-53	0.839411	0.407	0.104	2.76585e-49	4	SRCIN1
3.04461e-29	0.836993	0.254	0.072	2.60192e-25	4	CSKMT
2.01483e-49	0.836691	0.309	0.066	1.72188e-45	4	AC119396.1
2.19047e-62	0.829287	0.489	0.133	1.87197e-58	4	TNFSF9
7.10536e-44	0.827782	0.352	0.093	6.07224e-40	4	PRKCQ
1.04573e-69	0.827777	0.607	0.177	8.93679e-66	4	PNPLA3
1.16816e-08	0.822375	0.057	0.014	9.98309e-05	4	INPP4B
5.75608e-60	0.819426	1	0.576	4.91915e-56	4	SMCHD1
8.50041e-30	0.817938	0.227	0.057	7.26445e-26	4	GPR171
9.5783e-40	0.816492	0.331	0.09	8.18561e-36	4	UFSP1
5.92192e-25	0.815316	0.178	0.043	5.06087e-21	4	NAT16
2.62426e-69	0.813847	0.883	0.321	2.24269e-65	4	NCBP2AS2
1.57451e-33	0.811564	0.284	0.079	1.34557e-29	4	CYP26C1
1.14833e-72	0.809241	0.719	0.228	9.81361e-69	4	ARMCX6
1.3314e-10	0.808939	0.082	0.022	1.13781e-06	4	CTNNA2
1.42125e-15	0.807438	0.104	0.024	1.2146e-11	4	CXCL11
2.54563e-28	0.803585	0.221	0.058	2.17549e-24	4	NTNG1
2.57427e-21	0.803573	0.153	0.037	2.19997e-17	4	NFE2L3
2.34651e-36	0.802392	0.257	0.062	2.00533e-32	4	AL162231.1
4.9753e-65	0.798907	0.59	0.175	4.25189e-61	4	OCA2
1.00642e-78	0.798854	0.795	0.256	8.60083e-75	4	ACAP1
3.91624e-55	0.796683	0.456	0.125	3.34682e-51	4	C16orf54
3.7468e-17	0.796345	0.131	0.034	3.20202e-13	4	XAGE2
5.24371e-71	0.795828	0.577	0.158	4.48127e-67	4	MTFP1
1.74507e-73	0.795797	1	0.764	1.49134e-69	4	MMP17
2.95762e-23	0.795529	0.158	0.037	2.52758e-19	4	TRAJ1
2.18137e-17	0.795161	0.128	0.032	1.8642e-13	4	BEX2
2.41485e-48	0.792642	0.366	0.095	2.06373e-44	4	CFAP74
1.38328e-12	0.789517	0.123	0.038	1.18215e-08	4	ZNF485
3.38264e-48	0.789473	0.372	0.095	2.8908e-44	4	TRAJ38
5.34033e-19	0.786028	0.139	0.035	4.56385e-15	4	FBXO2
1.29992e-64	0.783091	0.568	0.165	1.11091e-60	4	GSTT2B
5.57243e-18	0.78288	0.145	0.039	4.7622e-14	4	LRG1
8.11886e-73	0.781612	0.68	0.214	6.93838e-69	4	PPP1R16B
7.81699e-78	0.781043	0.76	0.247	6.6804e-74	4	CHST11
2.04012e-07	0.781026	0.057	0.016	0.00174349	4	ZFP92
3.68175e-11	0.780233	0.107	0.033	3.14643e-07	4	MBLAC1
1.15312e-61	0.779247	0.555	0.168	9.85454e-58	4	SLC12A5
1.9709e-64	0.777037	0.522	0.142	1.68433e-60	4	AC093323.1
1.07343e-34	0.775677	0.279	0.074	9.17352e-31	4	HUS1B
2.66394e-65	0.774876	0.544	0.153	2.2766e-61	4	MRM1
3.46305e-67	0.774844	1	0.754	2.95952e-63	4	INSC
9.7428e-58	0.770576	0.519	0.156	8.3262e-54	4	SLC26A1
1.56839e-72	0.76962	0.784	0.266	1.34034e-68	4	MRS2
6.77986e-11	0.768228	0.079	0.02	5.79407e-07	4	NR1I2
1.10023e-51	0.766713	0.473	0.142	9.4026e-48	4	LZTS3
4.04035e-41	0.759119	0.342	0.093	3.45288e-37	4	TSPAN32
1.88981e-64	0.753894	0.65	0.203	1.61503e-60	4	TRAJ5
5.0711e-68	0.75241	0.975	0.427	4.33376e-64	4	HIST1H4F
1.33935e-81	0.75233	0.809	0.255	1.14461e-77	4	B4GALNT4
4.94127e-08	0.751169	0.049	0.011	0.000422281	4	C11orf94
1.70925e-37	0.749887	0.265	0.063	1.46072e-33	4	C20orf204
1.45914e-15	0.749488	0.139	0.041	1.24698e-11	4	MOV10L1
1.0002e-72	0.746185	0.978	0.401	8.54769e-69	4	SAP30
1.75548e-08	0.745648	0.079	0.025	0.000150023	4	CDH4
6.53937e-56	0.745136	0.978	0.427	5.58854e-52	4	ABTB2
2.3781e-74	0.744102	0.757	0.246	2.03232e-70	4	HIC2
2.63425e-68	0.742506	1	0.782	2.25123e-64	4	RNF213
3.79307e-41	0.74164	0.276	0.063	3.24155e-37	4	TMEM79
4.5682e-54	0.740675	0.44	0.117	3.90399e-50	4	IL27RA
1.83576e-08	0.740031	0.098	0.036	0.000156884	4	HPDL
4.61787e-55	0.733019	0.445	0.12	3.94643e-51	4	OASL
3.28992e-09	0.732582	0.044	0.008	2.81156e-05	4	AXDND1
1.25253e-16	0.732224	0.142	0.04	1.07042e-12	4	CDCA5
1.18396e-69	0.73099	0.658	0.203	1.01182e-65	4	TPX2
3.22789e-52	0.730011	0.459	0.133	2.75855e-48	4	UHRF1
4.20118e-51	0.729797	0.503	0.157	3.59033e-47	4	ZBP1
6.80723e-52	0.724458	0.984	0.471	5.81746e-48	4	LDB3
1.10645e-14	0.722453	0.142	0.044	9.45568e-11	4	SAMD3
5.25607e-57	0.721517	0.975	0.442	4.49184e-53	4	MIB2
3.86699e-42	0.720562	0.38	0.111	3.30473e-38	4	AKAP5
2.23141e-78	0.719595	0.842	0.281	1.90696e-74	4	PRKAR1B
2.1874e-78	0.718963	0.954	0.348	1.86935e-74	4	FOXD3
7.46396e-14	0.717924	0.109	0.029	6.3787e-10	4	LENEP
1.25329e-68	0.717511	0.503	0.124	1.07106e-64	4	DUSP28
1.24421e-07	0.715955	0.041	0.009	0.0010633	4	SLC26A7
5.55853e-48	0.715897	0.997	0.588	4.75032e-44	4	MPZ
1.75379e-48	0.715006	0.995	0.532	1.49879e-44	4	COL22A1
1.4991e-57	0.714626	0.94	0.383	1.28113e-53	4	AOPEP
1.88856e-56	0.714456	1	0.737	1.61396e-52	4	PCDH7
1.31456e-58	0.714299	0.577	0.18	1.12342e-54	4	ZC3H12D
2.55043e-08	0.713664	0.082	0.027	0.000217959	4	PSCA
5.24354e-74	0.712238	0.612	0.171	4.48113e-70	4	DPEP1
2.38057e-54	0.711829	0.508	0.149	2.03444e-50	4	CPNE7
1.89482e-37	0.711732	0.32	0.089	1.61932e-33	4	TXK
2.3522e-10	0.709417	0.071	0.017	2.01019e-06	4	EXO1
4.51935e-07	0.707142	0.041	0.009	0.00386223	4	ADM5
1.41816e-24	0.705321	0.189	0.049	1.21196e-20	4	WNT10A
6.42493e-72	0.704757	0.795	0.26	5.49074e-68	4	KCNS3
5.85934e-55	0.703031	0.962	0.439	5.00739e-51	4	SCAND1
7.90185e-55	0.702351	0.519	0.157	6.75292e-51	4	DFFB
9.41933e-70	0.70172	0.79	0.273	8.04976e-66	4	ZNF550
3.05602e-74	0.700748	0.855	0.296	2.61168e-70	4	TYSND1
1.92842e-67	0.699742	0.814	0.286	1.64803e-63	4	DERL3
4.56215e-72	0.698795	0.773	0.256	3.89882e-68	4	CD7
4.66298e-76	0.698788	0.768	0.241	3.98498e-72	4	TEDC1
1.90833e-49	0.697389	1	0.566	1.63086e-45	4	ACOT7
1.52643e-66	0.696749	0.713	0.236	1.30448e-62	4	CCSAP
1.23854e-55	0.694275	0.56	0.178	1.05845e-51	4	ZBTB9
7.2729e-33	0.693201	0.273	0.074	6.21542e-29	4	CARD14
1.87962e-72	0.691411	0.683	0.208	1.60632e-68	4	HIST1H3G
5.19544e-69	0.689486	0.59	0.17	4.44002e-65	4	IL12RB1
1.00766e-30	0.688545	0.224	0.055	8.61144e-27	4	ARMC10
2.42812e-29	0.687251	0.298	0.094	2.07508e-25	4	EPHA5
5.27997e-42	0.686523	0.388	0.115	4.51226e-38	4	HFM1
8.19114e-58	0.685588	0.568	0.178	7.00015e-54	4	PCED1B
2.44706e-65	0.685409	0.73	0.249	2.09126e-61	4	SKAP1
7.29147e-48	0.685385	0.981	0.474	6.23129e-44	4	BBS5
1.28844e-51	0.683654	1	0.671	1.1011e-47	4	ARGLU1
1.59464e-28	0.683182	0.26	0.076	1.36278e-24	4	KLHL35
4.38152e-27	0.681952	0.24	0.069	3.74445e-23	4	AC025283.2
1.298e-10	0.681202	0.06	0.012	1.10927e-06	4	GDNF
2.51045e-59	0.677587	0.552	0.161	2.14543e-55	4	TRAJ17
1.96005e-54	0.675495	0.434	0.115	1.67506e-50	4	NUDT15
8.74603e-67	0.675479	0.839	0.302	7.47436e-63	4	CELSR1
4.39193e-10	0.674385	0.093	0.029	3.75334e-06	4	PROSER2
5.08352e-70	0.67366	0.768	0.253	4.34438e-66	4	CHRM1
3.90335e-54	0.673306	0.486	0.144	3.33581e-50	4	HIST1H2AK
2.14883e-56	0.673181	0.984	0.454	1.83639e-52	4	TMCC2
5.87633e-64	0.672195	0.604	0.182	5.02191e-60	4	P2RX6
1.26316e-53	0.672016	0.967	0.45	1.0795e-49	4	HIST1H2AD
3.86118e-53	0.6707	0.984	0.466	3.29977e-49	4	PSRC1
8.81086e-57	0.669448	0.525	0.158	7.52976e-53	4	WHRN
6.75986e-65	0.668083	0.713	0.238	5.77698e-61	4	TUBA4A
2.02826e-71	0.667677	0.858	0.301	1.73335e-67	4	TOP3B
1.61491e-46	0.667311	1	0.627	1.3801e-42	4	MRFAP1L1
9.54014e-43	0.666544	0.331	0.085	8.153e-39	4	IDO1
2.32028e-52	0.665409	1	0.722	1.98291e-48	4	CDK6
7.94598e-47	0.664632	1	0.666	6.79064e-43	4	CNDP2
2.67882e-80	0.661001	0.801	0.253	2.28932e-76	4	IKBKE
9.02295e-62	0.659936	0.511	0.142	7.71101e-58	4	MFSD3
2.65311e-47	0.659726	0.986	0.508	2.26735e-43	4	CCDC12
8.90316e-18	0.659314	0.153	0.043	7.60864e-14	4	CDCA3
4.43365e-63	0.658683	0.582	0.174	3.789e-59	4	CSAG3
3.15061e-36	0.65553	0.366	0.115	2.69251e-32	4	PLAG1
1.98674e-17	0.654467	0.164	0.049	1.69787e-13	4	TRGV10
1.53643e-70	0.65301	0.781	0.263	1.31303e-66	4	HAAO
4.33901e-71	0.652167	0.713	0.225	3.70812e-67	4	GCAT
1.64545e-59	0.651414	1	0.799	1.4062e-55	4	PRRC2C
3.05002e-47	0.650837	0.973	0.48	2.60655e-43	4	PAK4
4.41435e-64	0.650277	0.929	0.361	3.7725e-60	4	LZTS1
1.22225e-67	0.650129	0.68	0.218	1.04453e-63	4	PTPN7
7.0412e-72	0.649709	0.842	0.29	6.01741e-68	4	TRAF1
1.21954e-66	0.648967	0.937	0.371	1.04221e-62	4	CD8A
2.07563e-42	0.648888	0.989	0.514	1.77383e-38	4	CORO1A
2.74927e-64	0.64887	0.781	0.28	2.34953e-60	4	TIGIT
5.92706e-29	0.648696	0.262	0.076	5.06527e-25	4	HAUS8
5.23415e-59	0.648442	1	0.811	4.47311e-55	4	TAP1
5.01075e-73	0.647305	0.811	0.271	4.28219e-69	4	SAPCD1
4.01999e-66	0.645008	0.907	0.347	3.43548e-62	4	ZNF134
2.26321e-08	0.644639	0.087	0.029	0.000193414	4	HESX1
1.37087e-75	0.644313	0.765	0.255	1.17155e-71	4	H2AFX
1.21066e-10	0.64419	0.085	0.023	1.03463e-06	4	SPNS3
2.49643e-25	0.643957	0.254	0.08	2.13345e-21	4	ETV2
6.72457e-59	0.643856	1	0.844	5.74681e-55	4	BEX3
2.41892e-11	0.643123	0.068	0.015	2.06721e-07	4	OAZ3
2.14179e-67	0.642193	0.94	0.366	1.83037e-63	4	NLRC5
3.59072e-47	0.641187	0.978	0.458	3.06863e-43	4	LRP2
2.03555e-69	0.640841	0.844	0.298	1.73958e-65	4	GTPBP3
6.36317e-48	0.639132	1	0.74	5.43797e-44	4	MOK
1.23562e-36	0.638895	0.292	0.076	1.05596e-32	4	TRBJ2-6
3.57807e-08	0.638113	0.068	0.02	0.000305782	4	FBXO6
8.85858e-18	0.638073	0.161	0.047	7.57055e-14	4	TRAJ33
1.48864e-75	0.637278	0.858	0.296	1.27219e-71	4	ST8SIA1
4.13739e-31	0.637256	0.29	0.086	3.53581e-27	4	FCSK
7.27872e-44	0.636995	0.992	0.55	6.2204e-40	4	BCL2
1.60888e-78	0.636219	0.694	0.202	1.37495e-74	4	FBXO32
1.48193e-67	0.635413	0.907	0.344	1.26645e-63	4	ZNF264
9.74256e-62	0.634853	1	0.854	8.32599e-58	4	TRIM28
1.47973e-07	0.631622	0.068	0.021	0.00126458	4	CLNK
9.67449e-52	0.63136	0.448	0.128	8.26782e-48	4	SPIRE2
2.01042e-43	0.631237	0.995	0.537	1.71811e-39	4	MCM7
3.44852e-66	0.630292	0.943	0.372	2.94711e-62	4	EXOSC6
9.80077e-47	0.629068	0.503	0.163	8.37574e-43	4	TRAJ16
1.53839e-18	0.62851	0.175	0.053	1.3147e-14	4	CDC45
8.94725e-13	0.628225	0.12	0.037	7.64632e-09	4	PTGES3L
1.5648e-75	0.628152	0.896	0.314	1.33728e-71	4	KDM6A
8.25031e-24	0.62587	0.221	0.066	7.05072e-20	4	DPF3
4.51423e-70	0.625739	0.842	0.29	3.85786e-66	4	ARHGAP39
9.27256e-53	0.625233	0.97	0.451	7.92433e-49	4	PCSK7
1.12064e-67	0.624753	0.858	0.315	9.57698e-64	4	NR2F6
5.75544e-68	0.623509	0.904	0.335	4.9186e-64	4	LIG3
7.08078e-51	0.622173	0.921	0.383	6.05124e-47	4	LIN28A
1.32123e-52	0.621868	0.497	0.149	1.12912e-48	4	PRC1
2.85486e-27	0.621651	0.224	0.061	2.43976e-23	4	EPOP
1.30134e-13	0.621473	0.126	0.037	1.11213e-09	4	TIMD4
6.2008e-54	0.621452	0.951	0.403	5.29921e-50	4	TATDN3
1.51811e-50	0.621332	0.489	0.148	1.29738e-46	4	TRAJ11
4.0516e-64	0.621112	0.459	0.113	3.4625e-60	4	CNNM1
3.15876e-62	0.618852	0.645	0.211	2.69947e-58	4	GSDMB
1.39355e-15	0.615599	0.137	0.04	1.19093e-11	4	TMEM145
1.73233e-67	0.615318	0.91	0.345	1.48045e-63	4	TSC22D2
7.28574e-61	0.614225	0.601	0.189	6.2264e-57	4	TAF6L
1.6924e-51	0.61233	1	0.817	1.44633e-47	4	SNCA
2.22775e-41	0.611032	1	0.692	1.90384e-37	4	LUC7L3
2.79508e-68	0.610583	0.855	0.307	2.38867e-64	4	INTS7
4.22843e-73	0.609958	0.869	0.303	3.61362e-69	4	TRNP1
2.61327e-43	0.609944	0.984	0.492	2.2333e-39	4	CNOT7
3.83129e-71	0.609921	0.699	0.218	3.27422e-67	4	ZNF549
6.14345e-08	0.609778	0.055	0.014	0.000525019	4	PDZK1
3.45794e-40	0.608655	0.385	0.118	2.95516e-36	4	KIF11
2.84791e-63	0.607981	0.929	0.362	2.43382e-59	4	POLG2
6.85236e-33	0.607807	0.281	0.079	5.85603e-29	4	SRRM3
1.07431e-65	0.60711	0.959	0.368	9.18107e-62	4	HELZ2
4.14674e-62	0.607055	0.885	0.334	3.5438e-58	4	CCDC86
9.71231e-45	0.606616	1	0.743	8.30014e-41	4	ARF3
3.17616e-55	0.605996	0.516	0.154	2.71434e-51	4	ISCA2
3.97692e-58	0.605529	0.544	0.163	3.39868e-54	4	PATL2
1.10103e-56	0.604392	0.784	0.295	9.40939e-53	4	ADAM23
9.34123e-69	0.603377	0.893	0.32	7.98301e-65	4	MST1
7.99876e-39	0.60333	0.997	0.537	6.83574e-35	4	TRAF4
6.38012e-42	0.603233	0.391	0.114	5.45245e-38	4	KLRG1
9.12976e-44	0.601644	0.995	0.526	7.80229e-40	4	CUEDC2
3.67915e-39	0.601138	0.366	0.109	3.14421e-35	4	SYTL1
5.91528e-55	0.600591	0.921	0.375	5.0552e-51	4	RHBDD3
4.05652e-10	0.600426	0.066	0.015	3.4667e-06	4	RHBDL1
2.97886e-49	0.599923	0.511	0.163	2.54573e-45	4	SARDH
7.73915e-10	0.599765	0.082	0.024	6.61388e-06	4	BEGAIN
4.54025e-70	0.599352	0.73	0.232	3.8801e-66	4	PNMA2
3.22772e-11	0.598594	0.085	0.022	2.75841e-07	4	HOXA1
2.22096e-44	0.598312	0.986	0.48	1.89803e-40	4	KLHL6
8.02389e-70	0.597505	0.754	0.253	6.85722e-66	4	HSCB
8.10167e-71	0.597341	0.899	0.317	6.92369e-67	4	DPH2
8.40257e-50	0.596815	0.997	0.489	7.18084e-46	4	GATD1
2.21645e-55	0.59647	0.579	0.186	1.89418e-51	4	APEX2
2.24905e-70	0.59636	0.549	0.144	1.92203e-66	4	MOCS3
2.65796e-41	0.596351	0.997	0.681	2.27149e-37	4	COL11A2
5.2586e-63	0.596215	0.596	0.186	4.494e-59	4	C13orf46
2.26456e-48	0.595838	0.404	0.112	1.93529e-44	4	AURKB
3.56953e-47	0.595773	0.423	0.125	3.05052e-43	4	TFAP2E
4.33858e-21	0.595281	0.191	0.056	3.70775e-17	4	TMEM132D
2.09718e-45	0.59515	0.986	0.502	1.79225e-41	4	KDM5B
5.03896e-07	0.595104	0.036	0.007	0.00430629	4	SLC35G5
9.87416e-31	0.594235	0.301	0.092	8.43845e-27	4	CD226
1.17455e-64	0.594023	0.792	0.279	1.00377e-60	4	ANKDD1A
2.47972e-44	0.593853	0.981	0.468	2.11917e-40	4	TBC1D22A
9.67353e-38	0.593343	0.399	0.131	8.267e-34	4	HOXB13
1.11527e-59	0.592741	0.579	0.181	9.5311e-56	4	RNF207
6.74425e-43	0.592636	1	0.546	5.76364e-39	4	PES1
8.33098e-15	0.592	0.087	0.018	7.11966e-11	4	RGS9
7.66441e-59	0.589566	0.773	0.279	6.55e-55	4	SSUH2
1.24046e-74	0.589513	0.708	0.215	1.0601e-70	4	JPH1
7.00528e-09	0.589256	0.077	0.022	5.98671e-05	4	CCR8
1.55082e-70	0.588981	0.863	0.304	1.32533e-66	4	C11orf98
1.61822e-34	0.588815	0.303	0.087	1.38293e-30	4	CCNE1
6.24508e-46	0.588064	1	0.76	5.33704e-42	4	ETS1
7.66991e-55	0.586454	0.585	0.194	6.55471e-51	4	FBXW9
2.88001e-37	0.586392	1	0.682	2.46126e-33	4	TYR
2.09637e-40	0.586114	0.997	0.573	1.79155e-36	4	NAT14
3.65964e-59	0.586034	0.91	0.361	3.12753e-55	4	TTC31
1.81401e-56	0.584918	0.929	0.367	1.55025e-52	4	NPAS3
8.87841e-45	0.584899	0.973	0.458	7.58749e-41	4	ZNF787
3.72844e-64	0.584416	0.918	0.344	3.18632e-60	4	UBIAD1
1.48215e-50	0.584106	0.538	0.175	1.26664e-46	4	ZFPM1
1.49147e-08	0.58341	0.06	0.015	0.000127461	4	C11orf65
1.72818e-35	0.583368	0.27	0.068	1.47691e-31	4	ZNF831
6.80236e-08	0.583363	0.063	0.018	0.00058133	4	SSPO
1.86096e-62	0.58301	0.62	0.195	1.59037e-58	4	SH3D21
1.99582e-20	0.582958	0.221	0.072	1.70562e-16	4	KYAT1
1.35819e-60	0.582761	0.694	0.234	1.16071e-56	4	ADAT1
1.91343e-50	0.58261	0.445	0.125	1.63522e-46	4	CPNE5
8.12055e-10	0.582218	0.117	0.042	6.93982e-06	4	ZNF597
3.50021e-50	0.581308	0.975	0.442	2.99128e-46	4	TRMT2A
5.09733e-16	0.580612	0.167	0.053	4.35618e-12	4	CD1D
1.77088e-69	0.580486	0.795	0.273	1.51339e-65	4	PAQR7
1.17868e-58	0.580434	0.68	0.234	1.0073e-54	4	SIRPG
2.90383e-08	0.580273	0.046	0.01	0.000248161	4	EFCAB8
4.92188e-59	0.579439	0.91	0.361	4.20624e-55	4	SRP19
5.97192e-33	0.579371	0.309	0.092	5.1036e-29	4	NDC80
2.61648e-61	0.57896	0.669	0.219	2.23604e-57	4	ZNF324
4.63763e-15	0.578858	0.107	0.026	3.96332e-11	4	RAB3B
1.28082e-51	0.57844	0.505	0.159	1.09459e-47	4	PDCD1
6.40992e-65	0.57784	0.639	0.196	5.47792e-61	4	COLEC11
1.34263e-39	0.577714	1	0.574	1.14741e-35	4	STAT5A
3.10233e-55	0.577655	0.967	0.419	2.65125e-51	4	ETV3
4.93004e-62	0.576971	0.735	0.249	4.21321e-58	4	RNF113A
1.71167e-61	0.575882	0.648	0.212	1.46279e-57	4	ZDHHC12
3.96376e-52	0.575626	1	0.829	3.38743e-48	4	MARCKSL1
7.75557e-11	0.575578	0.066	0.014	6.62791e-07	4	INSL3
9.10407e-47	0.575578	1	0.813	7.78034e-43	4	GBP4
1.16902e-49	0.574849	1	0.788	9.99048e-46	4	TNFRSF14
1.19013e-55	0.574555	0.978	0.415	1.01709e-51	4	TDRD7
4.11257e-55	0.574314	0.954	0.407	3.5146e-51	4	PATZ1
6.39795e-46	0.573554	0.975	0.467	5.46769e-42	4	LYPLAL1
8.38988e-33	0.573067	0.328	0.101	7.16999e-29	4	GPR52
1.18291e-12	0.572856	0.139	0.047	1.01091e-08	4	TRMT9B
6.03556e-56	0.572622	0.915	0.377	5.15799e-52	4	MINDY2
2.78241e-68	0.571189	0.877	0.319	2.37785e-64	4	TGIF2
2.78693e-16	0.570844	0.183	0.063	2.38171e-12	4	ZNF789
1.20308e-50	0.570615	0.407	0.108	1.02815e-46	4	COMTD1
1.39523e-67	0.570388	0.754	0.254	1.19236e-63	4	POLR3G
6.50511e-59	0.569593	0.587	0.184	5.55927e-55	4	CD8B
7.99135e-37	0.569585	0.997	0.67	6.82941e-33	4	FAM178B
7.10281e-58	0.568923	0.858	0.324	6.07006e-54	4	FAM120C
8.74069e-36	0.56868	0.992	0.554	7.46979e-32	4	OTUD7B
4.12657e-48	0.568552	1	0.79	3.52657e-44	4	ROMO1
2.29206e-58	0.568194	0.904	0.345	1.9588e-54	4	PTK7
2.09265e-40	0.56809	1	0.705	1.78838e-36	4	COX8A
3.20845e-35	0.566381	0.331	0.098	2.74194e-31	4	SMIM1
9.73433e-67	0.566241	0.883	0.32	8.31896e-63	4	ADAMTS13
9.9406e-49	0.565613	0.579	0.2	8.49524e-45	4	CNNM4
2.21155e-19	0.565496	0.208	0.068	1.88999e-15	4	PLCH2
4.468e-44	0.564614	0.997	0.514	3.81835e-40	4	RAB4B
1.74314e-65	0.564361	0.754	0.262	1.48969e-61	4	IRS2
2.1549e-57	0.56329	0.923	0.389	1.84158e-53	4	NUDC
2.55051e-44	0.563038	0.473	0.154	2.17966e-40	4	CD28
3.19709e-59	0.562333	0.907	0.361	2.73223e-55	4	UQCC2
8.17986e-18	0.561704	0.15	0.041	6.99051e-14	4	SPAG4
5.41163e-29	0.561407	0.26	0.075	4.62478e-25	4	PIGU
7.19091e-70	0.559207	0.68	0.203	6.14535e-66	4	SDK2
1.32521e-35	0.559122	0.992	0.551	1.13253e-31	4	LRCH4
2.47701e-60	0.558872	0.929	0.362	2.11685e-56	4	SGPP1
6.69337e-55	0.557739	0.533	0.166	5.72015e-51	4	PGBD2
6.79333e-19	0.556913	0.139	0.035	5.80558e-15	4	SLC9B1
1.61766e-61	0.556863	0.91	0.353	1.38245e-57	4	CCDC57
1.61012e-40	0.556455	0.992	0.509	1.37601e-36	4	AMDHD2
2.38066e-36	0.556142	0.303	0.083	2.03451e-32	4	KLF14
5.34541e-24	0.555965	0.26	0.086	4.56818e-20	4	GPR19
6.86562e-68	0.55382	0.724	0.241	5.86735e-64	4	MAST3
6.61248e-76	0.553096	0.836	0.277	5.65103e-72	4	TOMM5
2.92263e-48	0.55247	0.511	0.168	2.49768e-44	4	TRAJ22
9.59625e-41	0.552395	0.986	0.49	8.20096e-37	4	FAM102A
2.57407e-60	0.552251	0.617	0.195	2.1998e-56	4	TTI2
5.03009e-41	0.551885	0.445	0.146	4.29871e-37	4	LTB4R
3.06085e-58	0.551807	0.634	0.209	2.61581e-54	4	NRTN
1.71551e-60	0.551738	0.861	0.327	1.46607e-56	4	CD27
2.39374e-56	0.550748	0.429	0.109	2.04569e-52	4	XKR6
3.88746e-63	0.550595	0.844	0.311	3.32222e-59	4	SCFD2
2.57628e-13	0.550402	0.093	0.022	2.20169e-09	4	RUFY4
9.94086e-63	0.550334	0.705	0.238	8.49546e-59	4	LIN52
5.78537e-33	0.550307	0.26	0.067	4.94418e-29	4	DBNDD1
4.72204e-35	0.550203	0.314	0.092	4.03546e-31	4	FASLG
2.90452e-21	0.549456	0.183	0.051	2.48221e-17	4	DGCR6L
7.60337e-35	0.548942	1	0.648	6.49784e-31	4	PTGDS
1.39724e-64	0.548222	0.73	0.246	1.19408e-60	4	MAP3K10
1.52088e-42	0.546767	0.434	0.138	1.29975e-38	4	PARS2
8.60212e-59	0.546669	0.872	0.327	7.35137e-55	4	NDE1
5.58855e-50	0.546537	0.934	0.416	4.77598e-46	4	CD3D
4.62373e-40	0.546383	0.978	0.469	3.95144e-36	4	R3HCC1L
2.57827e-30	0.546346	0.295	0.091	2.20339e-26	4	ARMC5
2.1113e-40	0.546223	0.981	0.475	1.80431e-36	4	GTF2F2
9.2283e-48	0.54529	0.467	0.144	7.8865e-44	4	STARD8
6.85284e-41	0.545222	1	0.742	5.85644e-37	4	RBM39
4.34527e-59	0.545066	0.921	0.366	3.71347e-55	4	FHDC1
4.12649e-66	0.54502	0.661	0.207	3.5265e-62	4	DEDD2
3.50824e-68	0.544254	0.869	0.309	2.99814e-64	4	BCAS4
4.71163e-10	0.544151	0.087	0.026	4.02656e-06	4	IGHD
3.12922e-64	0.543643	0.768	0.263	2.67423e-60	4	PLA1A
3.29094e-25	0.543522	0.238	0.072	2.81244e-21	4	GZMB
6.75638e-09	0.543178	0.068	0.019	5.774e-05	4	ADD2
8.35552e-15	0.542762	0.131	0.038	7.14063e-11	4	SGPP2
9.64766e-51	0.542069	0.489	0.147	8.24489e-47	4	ASB2
1.37905e-39	0.541997	0.986	0.52	1.17854e-35	4	CRELD2
2.78789e-56	0.541765	0.536	0.163	2.38253e-52	4	FIGNL2
1.61391e-36	0.540736	1	0.584	1.37925e-32	4	CREBZF
1.11054e-37	0.540296	1	0.59	9.49069e-34	4	TNKS
4.82205e-11	0.540169	0.12	0.04	4.12093e-07	4	TRBV6-2
2.86496e-40	0.53997	0.997	0.738	2.44839e-36	4	HDGF
1.88941e-69	0.539386	0.787	0.269	1.61469e-65	4	ZNF124
1.63341e-69	0.539239	0.694	0.218	1.39591e-65	4	YDJC
2.20333e-21	0.53845	0.199	0.058	1.88296e-17	4	FOXD2
3.71402e-22	0.538077	0.178	0.046	3.17401e-18	4	CIT
7.39449e-79	0.537738	1	0.975	6.31933e-75	4	GSTP1
3.29255e-68	0.536681	0.757	0.254	2.81381e-64	4	PIGH
3.09334e-29	0.536426	0.273	0.081	2.64357e-25	4	PLPP6
5.02463e-46	0.536219	1	0.788	4.29405e-42	4	TAPBP
2.88803e-39	0.536023	0.984	0.482	2.46811e-35	4	RCAN1
1.05826e-58	0.535981	0.904	0.351	9.04386e-55	4	DAGLA
2.92641e-39	0.535523	0.355	0.103	2.50091e-35	4	GATA3
4.33232e-53	0.534368	0.566	0.183	3.7024e-49	4	TRAJ7
1.26889e-32	0.53395	0.997	0.562	1.08439e-28	4	GNPTG
8.45961e-14	0.533654	0.15	0.05	7.22958e-10	4	ZNF674
5.34403e-50	0.533646	0.918	0.372	4.567e-46	4	BNC2
7.99538e-56	0.533612	0.56	0.176	6.83285e-52	4	HIST1H1D
1.26024e-34	0.533434	0.325	0.097	1.077e-30	4	PLK1
[truncated: 1,001 more rows]

## Sheet: UKF4_DEG
p_val	avg_log2FC	pct.1	pct.2	p_val_adj	bayes_space	gene
4.38078e-119	2.24861	0.851	0.329	4.12275e-115	1	FABP4
3.28139e-07	2.22491	0.032	0.006	0.00308811	1	SEMA3G
1.50229e-10	2.03227	0.058	0.013	1.4138e-06	1	FCGBP
4.83729e-17	1.98603	0.119	0.031	4.55237e-13	1	AKR1C2
1.70655e-21	1.84046	0.199	0.065	1.60603e-17	1	PLIN4
3.01247e-41	1.81724	0.428	0.182	2.83504e-37	1	CLU
2.59504e-13	1.59338	0.134	0.046	2.44219e-09	1	PLIN1
8.90143e-15	1.40129	0.276	0.138	8.37714e-11	1	ADIRF
2.59569e-09	1.38224	0.117	0.046	2.44281e-05	1	SORBS1
2.73777e-99	1.32273	1	0.808	2.57651e-95	1	COL1A2
8.25245e-08	1.28987	0.106	0.044	0.000776638	1	SFRP2
1.76583e-85	1.28849	0.991	0.488	1.66182e-81	1	COL6A2
9.51764e-16	1.25615	0.415	0.28	8.95705e-12	1	CAVIN1
9.75459e-21	1.24399	0.384	0.214	9.18005e-17	1	IGFBP4
1.84881e-77	1.22686	0.989	0.52	1.73992e-73	1	DCN
2.14468e-10	1.21149	0.177	0.083	2.01836e-06	1	GPX3
8.02299e-10	1.17539	0.147	0.064	7.55043e-06	1	HSPB6
1.5286e-83	1.16302	1	0.84	1.43857e-79	1	COL3A1
2.57739e-81	1.15906	1	0.762	2.42558e-77	1	COL1A1
1.30857e-09	1.15553	0.296	0.197	1.2315e-05	1	C3
8.97929e-25	1.10101	0.514	0.307	8.45041e-21	1	FBN1
5.66617e-60	1.06276	0.991	0.566	5.33243e-56	1	FSTL1
7.14701e-29	1.02533	0.659	0.374	6.72605e-25	1	G0S2
4.35054e-16	1.00712	0.981	0.748	4.0943e-12	1	SCD
2.09592e-15	0.986912	0.408	0.262	1.97247e-11	1	TNC
9.66697e-50	0.938319	0.998	0.625	9.09758e-46	1	PLTP
9.85803e-53	0.937909	0.998	0.555	9.27739e-49	1	C1R
3.25918e-07	0.926068	0.359	0.289	0.00306721	1	S100A4
3.11758e-31	0.853419	0.732	0.408	2.93396e-27	1	PLEC
1.50977e-37	0.840702	0.873	0.489	1.42085e-33	1	LRP1
9.05917e-29	0.82355	0.747	0.433	8.52558e-25	1	LENG8
1.98202e-19	0.812249	1	0.732	1.86528e-15	1	IGFBP7
6.23401e-09	0.801158	0.4	0.316	5.86683e-05	1	COL6A1
1.6664e-19	0.784138	0.635	0.4	1.56825e-15	1	ZFP36L2
1.63201e-37	0.774318	0.879	0.47	1.53589e-33	1	C1QC
2.78167e-28	0.748419	0.927	0.567	2.61783e-24	1	PNPLA2
2.08333e-31	0.721466	0.991	0.6	1.96063e-27	1	TIMP3
1.61119e-36	0.711264	0.972	0.556	1.51629e-32	1	ANXA1
1.52624e-16	0.705924	0.639	0.415	1.43635e-12	1	CTDSP2
8.98453e-26	0.68135	0.778	0.45	8.45534e-22	1	LTBP3
1.4741e-21	0.669625	0.732	0.448	1.38727e-17	1	RSRP1
1.44933e-07	0.66675	0.227	0.131	0.00136397	1	CXCL14
6.57282e-26	0.660152	0.847	0.493	6.18568e-22	1	WSB1
7.81937e-25	0.655572	0.834	0.49	7.35881e-21	1	ARPC5
5.06564e-25	0.637348	0.927	0.558	4.76727e-21	1	PRRX1
7.5726e-28	0.636073	0.875	0.507	7.12658e-24	1	CALD1
1.70214e-26	0.635504	0.87	0.506	1.60189e-22	1	GOLPH3
5.68567e-19	0.626845	0.715	0.434	5.35079e-15	1	SLC2A4RG
1.27993e-34	0.624178	0.991	0.588	1.20454e-30	1	COL6A3
1.30248e-25	0.617422	0.916	0.562	1.22577e-21	1	MXRA7
3.24977e-24	0.616306	0.754	0.434	3.05836e-20	1	METRNL
1.92803e-22	0.603106	0.81	0.478	1.81447e-18	1	SAR1A
1.6894e-19	0.60096	0.987	0.659	1.58989e-15	1	ANXA2
2.73557e-36	0.590821	1	0.966	2.57444e-32	1	SPARC
1.09143e-14	0.588395	0.641	0.413	1.02715e-10	1	TGFBR2
1.10153e-22	0.58823	0.847	0.518	1.03665e-18	1	ECH1
5.43869e-30	0.580984	0.961	0.564	5.11835e-26	1	FOS
4.8477e-22	0.575742	0.819	0.479	4.56217e-18	1	ANKRD11
4.61541e-22	0.573392	0.829	0.505	4.34356e-18	1	UBE2G2
2.53604e-22	0.564763	0.786	0.457	2.38666e-18	1	DAB2
4.00184e-17	0.564261	0.717	0.444	3.76614e-13	1	ST5
9.3878e-20	0.561457	1	0.923	8.83485e-16	1	FLNA
1.68583e-21	0.560637	0.823	0.49	1.58653e-17	1	MED24
6.96269e-19	0.557438	0.961	0.625	6.55259e-15	1	ASPH
1.08339e-18	0.554946	0.769	0.468	1.01957e-14	1	CAV2
1.03823e-27	0.552401	0.778	0.418	9.77082e-24	1	COL4A1
1.2278e-20	0.543327	0.829	0.493	1.15548e-16	1	ZBTB7A
2.8559e-18	0.540436	0.769	0.473	2.68769e-14	1	CTDSP1
1.05405e-18	0.540036	0.773	0.476	9.91964e-15	1	PRKACA
8.82571e-23	0.537642	0.94	0.567	8.30588e-19	1	NBL1
3.50171e-20	0.537261	0.808	0.484	3.29546e-16	1	ANXA6
2.37264e-18	0.536965	0.773	0.474	2.23289e-14	1	CCDC12
2.86707e-18	0.535756	0.808	0.498	2.6982e-14	1	RENBP
6.64098e-19	0.535738	0.797	0.49	6.24982e-15	1	CTNNA1
2.03092e-19	0.534198	0.808	0.492	1.9113e-15	1	PPFIA1
1.87848e-21	0.52971	0.834	0.495	1.76784e-17	1	EHD1
4.65124e-20	0.528855	0.808	0.484	4.37728e-16	1	GLRX5
9.71914e-20	0.528462	0.767	0.456	9.14668e-16	1	GDI2
2.57527e-17	0.528409	0.754	0.461	2.42359e-13	1	HCFC1R1
5.1241e-21	0.524872	0.851	0.514	4.82229e-17	1	CPNE1
2.72825e-21	0.523458	0.844	0.508	2.56756e-17	1	BCL7C
3.83872e-18	0.522755	0.803	0.494	3.61262e-14	1	PLS3
6.2173e-17	0.522415	0.752	0.467	5.8511e-13	1	TRIP12
3.90184e-18	0.52204	0.778	0.483	3.67202e-14	1	DLD
9.94714e-18	0.521204	0.771	0.473	9.36126e-14	1	LRCH4
1.39449e-18	0.520369	0.803	0.49	1.31236e-14	1	EIF2B1
1.12592e-19	0.518541	0.825	0.493	1.0596e-15	1	SCARB2
4.12005e-15	0.517816	0.734	0.468	3.87738e-11	1	MYO1C
1.05906e-17	0.51773	0.745	0.454	9.96683e-14	1	CBX5
6.8917e-21	0.517357	0.86	0.507	6.48578e-17	1	TBC1D9B
5.71373e-18	0.513398	0.812	0.495	5.37719e-14	1	ECHS1
3.82367e-20	0.512652	0.978	0.625	3.59846e-16	1	RHOB
1.52033e-20	0.512242	0.842	0.502	1.43078e-16	1	VCP
6.44824e-11	0.511483	0.603	0.405	6.06844e-07	1	RNF213
3.96431e-17	0.504442	0.786	0.486	3.73082e-13	1	KLC1
7.46888e-14	0.503166	0.689	0.441	7.02896e-10	1	DCLK1
1.22855e-10	0.502161	0.611	0.414	1.15619e-06	1	TXNIP
2.17535e-21	0.502114	0.944	0.58	2.04723e-17	1	LAMC1
2.75855e-12	0.501102	0.663	0.433	2.59607e-08	1	SUN2
1.45545e-22	0.500791	0.808	0.46	1.36972e-18	1	ENG
1.66141e-18	0.500093	0.834	0.505	1.56355e-14	1	DIDO1
4.09434e-20	0.499926	0.86	0.52	3.85318e-16	1	VPS28
3.70508e-20	0.499686	0.886	0.524	3.48685e-16	1	EMP1
1.90386e-17	0.49854	0.797	0.487	1.79173e-13	1	CCAR2
1.32528e-15	0.498394	0.758	0.474	1.24722e-11	1	GTF2F1
8.04024e-19	0.496645	0.816	0.492	7.56667e-15	1	DBNL
9.47978e-11	0.496271	0.629	0.428	8.92142e-07	1	API5
3.85123e-20	0.494857	0.901	0.555	3.62439e-16	1	COLGALT1
4.31707e-20	0.493878	0.853	0.504	4.0628e-16	1	GRK2
1.41344e-11	0.493587	0.631	0.417	1.33019e-07	1	TMEM189
1.07625e-11	0.493507	0.65	0.434	1.01286e-07	1	RASA2
1.94367e-19	0.492521	0.97	0.635	1.82919e-15	1	P4HB
5.65736e-19	0.492	0.838	0.509	5.32414e-15	1	TACC1
1.02137e-15	0.491676	0.724	0.455	9.6121e-12	1	CCDC91
1.91039e-22	0.490821	0.803	0.453	1.79787e-18	1	PLXND1
4.5238e-20	0.490569	0.849	0.505	4.25734e-16	1	EMC10
1.02269e-19	0.490569	0.853	0.518	9.62458e-16	1	ANKLE2
5.54183e-11	0.490366	0.624	0.421	5.21542e-07	1	TNKS2
5.65429e-13	0.489995	0.683	0.447	5.32125e-09	1	GIPC1
5.6984e-19	0.489359	0.814	0.486	5.36276e-15	1	MARCH6
1.22183e-18	0.489083	0.901	0.564	1.14986e-14	1	NKTR
9.00274e-17	0.488681	0.84	0.517	8.47248e-13	1	ARHGEF1
6.43395e-17	0.48701	0.836	0.526	6.05499e-13	1	AK1
4.62299e-16	0.48469	0.784	0.483	4.35069e-12	1	CYC1
2.03263e-15	0.483901	0.754	0.467	1.91291e-11	1	ZNF207
1.92593e-18	0.481984	0.829	0.503	1.8125e-14	1	PUF60
3.88376e-17	0.480832	0.754	0.465	3.65501e-13	1	GMFG
2.14017e-19	0.47944	0.844	0.506	2.01411e-15	1	ARL2
4.71181e-12	0.478128	0.665	0.441	4.43428e-08	1	PDHB
7.2486e-18	0.476376	0.836	0.499	6.82166e-14	1	QDPR
3.0506e-14	0.476222	0.724	0.461	2.87092e-10	1	FKBP3
1.04455e-17	0.475139	0.784	0.474	9.83026e-14	1	ANKRD10
9.6789e-16	0.47503	0.769	0.475	9.10881e-12	1	RAB32
1.3539e-13	0.47465	0.717	0.457	1.27415e-09	1	PKD2
3.51309e-18	0.47416	0.814	0.497	3.30617e-14	1	STAT2
3.34774e-17	0.47392	0.778	0.477	3.15056e-13	1	RBM6
2.80798e-15	0.47355	0.745	0.459	2.64259e-11	1	FARP1
2.38121e-14	0.472006	0.752	0.48	2.24096e-10	1	TSEN34
2.06458e-14	0.470081	0.728	0.459	1.94298e-10	1	VASP
3.38495e-16	0.468399	0.834	0.524	3.18558e-12	1	CLASRP
2.10107e-16	0.46792	0.834	0.51	1.97732e-12	1	LRRC59
1.00293e-13	0.467794	0.721	0.46	9.43862e-10	1	DAD1
8.07022e-18	0.466896	0.832	0.51	7.59489e-14	1	SCAND1
2.14031e-16	0.46537	0.812	0.504	2.01425e-12	1	PFKL
2.3888e-17	0.465227	0.825	0.499	2.2481e-13	1	SPTAN1
4.74764e-17	0.464903	0.832	0.517	4.468e-13	1	TNKS
1.90443e-16	0.464889	0.808	0.497	1.79225e-12	1	OGA
5.17766e-16	0.464653	0.756	0.464	4.8727e-12	1	HIST1H4I
1.1178e-17	0.463815	0.836	0.514	1.05196e-13	1	RNF126
1.03181e-17	0.462664	0.974	0.631	9.7104e-14	1	ACADVL
9.14099e-21	0.462597	0.927	0.556	8.60259e-17	1	TGFBI
4.62252e-10	0.462217	0.626	0.428	4.35025e-06	1	TMEM214
4.53728e-17	0.461519	0.812	0.495	4.27003e-13	1	OSTF1
9.36137e-12	0.461048	0.685	0.454	8.80998e-08	1	MTCH1
6.41886e-12	0.459719	0.663	0.438	6.04079e-08	1	FAM193B
3.27688e-15	0.459143	1	0.901	3.08388e-11	1	FCGRT
1.60243e-18	0.458693	0.864	0.53	1.50804e-14	1	ETFB
6.35141e-17	0.458573	0.786	0.487	5.97731e-13	1	ANXA4
1.08909e-14	0.458553	0.737	0.466	1.02494e-10	1	UBE2E2
2.15845e-10	0.456913	0.991	0.724	2.03132e-06	1	AEBP1
3.2592e-14	0.456772	0.771	0.485	3.06723e-10	1	NPEPL1
6.38226e-17	0.455184	0.81	0.498	6.00634e-13	1	VEGFB
8.51265e-14	0.455082	0.715	0.453	8.01126e-10	1	HNRNPH3
9.19685e-15	0.454455	0.734	0.461	8.65515e-11	1	SEMA4C
1.03656e-17	0.451644	0.851	0.517	9.75504e-14	1	REX1BD
6.78521e-14	0.451461	0.989	0.674	6.38556e-10	1	HNRNPA0
3.43611e-14	0.451223	0.715	0.443	3.23373e-10	1	KIAA0930
1.0914e-15	0.450794	0.762	0.466	1.02712e-11	1	CABLES1
5.19827e-16	0.449941	0.823	0.505	4.89209e-12	1	MAPKAPK2
3.26146e-13	0.449219	0.693	0.444	3.06936e-09	1	RILPL1
5.66406e-16	0.448829	0.78	0.486	5.33045e-12	1	RBBP7
2.72763e-16	0.447772	0.799	0.489	2.56697e-12	1	OXA1L
9.23389e-15	0.447772	0.788	0.485	8.69002e-11	1	DR1
1.08597e-16	0.447413	0.832	0.516	1.02201e-12	1	ANP32A
2.81687e-16	0.445601	0.793	0.487	2.65095e-12	1	SLC25A39
4.40476e-13	0.445316	0.976	0.665	4.14532e-09	1	NFIC
1.15462e-14	0.444081	0.756	0.467	1.08661e-10	1	ZC3H4
1.14376e-12	0.443567	0.7	0.454	1.07639e-08	1	TOLLIP
2.11333e-17	0.443477	0.81	0.489	1.98886e-13	1	VAMP3
9.33597e-17	0.442456	0.799	0.489	8.78608e-13	1	TMEM9B
8.17972e-15	0.442412	0.767	0.48	7.69793e-11	1	PTAR1
2.02013e-16	0.442047	0.855	0.531	1.90115e-12	1	SUCLG1
1.93759e-14	0.441835	0.732	0.455	1.82347e-10	1	MAP2K3
6.58073e-14	0.441394	0.728	0.46	6.19313e-10	1	CCT5
2.47958e-16	0.440457	0.84	0.517	2.33354e-12	1	PNISR
5.18293e-09	0.438662	0.609	0.423	4.87766e-05	1	QRICH1
6.6895e-14	0.438058	0.728	0.464	6.29549e-10	1	XPO1
1.43012e-16	0.437659	0.86	0.533	1.34588e-12	1	CD276
1.46635e-15	0.437163	0.765	0.478	1.37998e-11	1	BCLAF1
6.51532e-16	0.436727	0.806	0.498	6.13156e-12	1	FBXW2
1.768e-13	0.436478	0.713	0.455	1.66386e-09	1	DNPEP
1.20475e-13	0.436159	0.726	0.459	1.13379e-09	1	ENTPD1
1.43023e-16	0.434872	0.819	0.505	1.34599e-12	1	GCN1
2.69668e-15	0.434601	0.801	0.497	2.53784e-11	1	CISD3
3.77197e-15	0.434385	0.87	0.548	3.5498e-11	1	C14orf119
1.41066e-15	0.433786	0.89	0.557	1.32758e-11	1	WIPI2
5.70775e-16	0.432953	0.827	0.506	5.37157e-12	1	ESYT1
2.3248e-15	0.432874	0.834	0.519	2.18787e-11	1	LUC7L
5.95117e-17	0.432387	0.853	0.523	5.60065e-13	1	UBE2B
2.20795e-17	0.432243	0.905	0.557	2.0779e-13	1	PHB2
7.48165e-15	0.432042	0.829	0.52	7.04098e-11	1	NR1H2
3.0638e-15	0.431439	0.836	0.522	2.88334e-11	1	CBFB
1.23203e-14	0.430948	0.739	0.456	1.15946e-10	1	HCFC1
6.02448e-14	0.430672	0.747	0.47	5.66963e-10	1	DEGS1
1.17776e-15	0.4305	0.795	0.494	1.10839e-11	1	QTRT1
7.40525e-15	0.429676	0.821	0.511	6.96908e-11	1	UBP1
6.30368e-07	0.429573	0.996	0.783	0.0059324	1	RNASE1
1.80284e-16	0.428838	0.829	0.51	1.69665e-12	1	NDUFS1
2.69327e-16	0.428626	0.892	0.556	2.53464e-12	1	PRDX4
3.24716e-13	0.428411	0.715	0.453	3.0559e-09	1	SEC31A
4.73825e-18	0.428219	0.829	0.496	4.45916e-14	1	SEPTIN10
5.09541e-16	0.427934	0.816	0.492	4.79529e-12	1	CDC42SE1
4.83145e-15	0.427574	0.803	0.509	4.54688e-11	1	EIF3D
1.15765e-15	0.426786	0.803	0.496	1.08947e-11	1	GTF3C1
3.32554e-16	0.42668	0.832	0.512	3.12967e-12	1	SF3B5
4.09847e-14	0.42662	0.749	0.475	3.85707e-10	1	SSRP1
7.8389e-08	0.426592	0.577	0.407	0.000737719	1	STX10
7.98318e-10	0.426586	0.633	0.421	7.51297e-06	1	CENPB
1.96736e-14	0.426019	0.79	0.497	1.85148e-10	1	FUBP3
1.67573e-17	0.42601	0.875	0.531	1.57703e-13	1	SQOR
3.21689e-15	0.424007	0.965	0.644	3.02741e-11	1	TMEM109
3.12203e-16	0.423393	0.879	0.545	2.93814e-12	1	RABAC1
8.56654e-14	0.423253	0.739	0.464	8.06197e-10	1	MED25
8.1252e-13	0.422788	0.754	0.475	7.64663e-09	1	PLAAT3
4.85849e-17	0.422457	0.844	0.503	4.57232e-13	1	MACF1
6.59622e-12	0.422214	0.695	0.46	6.2077e-08	1	POLDIP3
1.79357e-14	0.419733	0.769	0.487	1.68793e-10	1	PSMD1
3.77958e-14	0.419678	0.784	0.491	3.55697e-10	1	NAA60
3.18021e-13	0.419255	0.745	0.476	2.99289e-09	1	SPSB3
9.45604e-16	0.418933	0.821	0.509	8.89907e-12	1	CSTF3
4.57774e-12	0.418122	0.698	0.445	4.30811e-08	1	PSMB8
5.23218e-15	0.417712	0.771	0.479	4.924e-11	1	LMAN1
1.03452e-12	0.417054	0.721	0.467	9.73589e-09	1	CHTOP
1.09622e-14	0.415843	0.762	0.478	1.03165e-10	1	INCENP
7.99517e-14	0.415414	0.793	0.5	7.52425e-10	1	SRSF4
1.02764e-12	0.415399	0.728	0.465	9.67109e-09	1	FAM120A
4.52211e-14	0.414466	0.754	0.47	4.25575e-10	1	TIMM13
2.23772e-17	0.414447	0.864	0.52	2.10592e-13	1	OAZ2
3.56088e-16	0.414302	0.903	0.559	3.35114e-12	1	HNRNPLL
7.31233e-15	0.413061	0.814	0.508	6.88164e-11	1	FXYD5
4.72704e-10	0.413031	0.67	0.449	4.44862e-06	1	ACIN1
5.10958e-14	0.412644	0.754	0.475	4.80862e-10	1	EIF4A3
1.0296e-13	0.41256	0.73	0.457	9.68956e-10	1	SSNA1
1.5658e-13	0.412461	0.773	0.495	1.47357e-09	1	GNL1
1.79836e-14	0.410569	0.78	0.483	1.69244e-10	1	ARL2BP
6.14467e-16	0.410419	0.853	0.529	5.78275e-12	1	SZRD1
8.75855e-08	0.409737	0.585	0.416	0.000824268	1	EXOC3
6.16638e-14	0.409096	0.821	0.517	5.80318e-10	1	NRP2
1.80092e-14	0.408777	0.851	0.542	1.69484e-10	1	PLEKHM2
1.66254e-14	0.408743	0.734	0.449	1.56461e-10	1	CPQ
3.85558e-15	0.408688	0.803	0.493	3.62849e-11	1	GPRC5B
2.54724e-14	0.408203	0.829	0.519	2.39721e-10	1	ATL3
5.11282e-11	0.408061	0.687	0.453	4.81168e-07	1	FNBP1
1.53886e-16	0.407838	0.959	0.604	1.44822e-12	1	ZFP36L1
2.08235e-14	0.407549	0.782	0.492	1.9597e-10	1	C7orf50
8.05291e-14	0.407203	0.838	0.529	7.5786e-10	1	XRN2
6.4186e-10	0.407146	0.661	0.447	6.04054e-06	1	ARHGEF2
2.5939e-15	0.40681	0.832	0.515	2.44112e-11	1	RERE
3.53691e-12	0.40617	0.983	0.676	3.32859e-08	1	CD151
6.40898e-15	0.404672	0.911	0.584	6.03149e-11	1	XRCC6
2.44564e-13	0.403821	0.749	0.47	2.30159e-09	1	DUSP6
6.83284e-12	0.403705	0.711	0.463	6.43038e-08	1	RBBP6
4.86619e-08	0.403597	0.603	0.416	0.000457957	1	KCTD12
9.01585e-14	0.403322	0.808	0.503	8.48482e-10	1	BABAM1
4.45576e-16	0.403127	0.836	0.503	4.19331e-12	1	PSMC3
6.49989e-16	0.402549	0.799	0.492	6.11705e-12	1	FAH
1.28748e-15	0.402324	0.823	0.508	1.21165e-11	1	TM9SF3
1.25228e-12	0.400905	0.724	0.462	1.17852e-08	1	FBXW11
1.81364e-22	0.40062	0.92	0.524	1.70681e-18	1	CD163
8.01553e-14	0.400535	0.765	0.486	7.54341e-10	1	ADNP
7.08451e-15	0.400093	0.901	0.559	6.66723e-11	1	RNF11
1.90373e-18	0.400083	0.952	0.572	1.7916e-14	1	ZYX
3.33515e-08	0.399801	0.583	0.41	0.000313871	1	PRXL2B
2.98478e-13	0.399047	0.76	0.483	2.80898e-09	1	BCKDK
4.2975e-13	0.39886	0.773	0.486	4.04438e-09	1	PI4KA
8.82693e-10	0.398629	0.644	0.433	8.30702e-06	1	SAP30BP
3.13442e-10	0.398561	0.67	0.444	2.9498e-06	1	DUSP23
3.10688e-15	0.397797	0.823	0.505	2.92389e-11	1	SNX17
4.069e-09	0.397711	0.622	0.429	3.82934e-05	1	DHX30
4.63504e-14	0.397277	0.754	0.461	4.36203e-10	1	DIPK1B
1.03613e-16	0.397043	0.853	0.517	9.75098e-13	1	SYVN1
3.71069e-14	0.396386	0.816	0.513	3.49213e-10	1	NAB1
2.1164e-14	0.396326	0.829	0.515	1.99175e-10	1	MAP4K4
1.4922e-14	0.395622	0.81	0.5	1.40431e-10	1	POM121
3.44134e-11	0.394838	0.678	0.439	3.23865e-07	1	SAMM50
1.30161e-11	0.394838	0.691	0.45	1.22494e-07	1	GNL3
3.00474e-17	0.394838	0.892	0.548	2.82776e-13	1	AHSA1
6.11458e-15	0.393384	0.844	0.529	5.75443e-11	1	SNX1
7.10341e-14	0.393141	0.76	0.474	6.68502e-10	1	AIP
4.28451e-11	0.393017	0.683	0.452	4.03215e-07	1	METAP2
7.69139e-12	0.392149	0.717	0.471	7.23837e-08	1	NDUFA10
4.84806e-14	0.391585	0.786	0.492	4.56251e-10	1	PAFAH1B1
4.02007e-11	0.391235	0.691	0.458	3.78328e-07	1	PIP4K2B
1.08479e-13	0.390818	0.797	0.503	1.02089e-09	1	CD2AP
1.10733e-14	0.39041	0.834	0.519	1.04211e-10	1	CASC3
1.99805e-10	0.390381	0.683	0.461	1.88037e-06	1	MOGS
9.68273e-10	0.390347	0.667	0.453	9.11241e-06	1	CYB561A3
5.48803e-14	0.390161	0.795	0.497	5.16479e-10	1	GAB2
6.75549e-14	0.390154	0.957	0.616	6.35759e-10	1	MYC
9.8094e-15	0.389684	0.84	0.519	9.23163e-11	1	MCFD2
1.11251e-14	0.389044	0.836	0.524	1.04699e-10	1	RAPGEF1
2.12894e-14	0.387671	0.849	0.542	2.00355e-10	1	NCSTN
1.77165e-11	0.387056	0.726	0.475	1.6673e-07	1	ANAPC16
2.59226e-14	0.386827	0.803	0.502	2.43957e-10	1	SPIN1
1.60878e-10	0.386745	0.674	0.444	1.51402e-06	1	WDR61
2.98314e-14	0.386018	0.894	0.56	2.80743e-10	1	FNDC3A
2.47202e-14	0.385568	0.888	0.567	2.32642e-10	1	INTS11
6.56409e-12	0.385026	0.726	0.467	6.17746e-08	1	SPNS1
8.2469e-11	0.384904	0.667	0.431	7.76115e-07	1	PIK3CD
4.98218e-09	0.384569	0.657	0.451	4.68873e-05	1	IDH3B
1.27918e-11	0.383583	0.717	0.459	1.20384e-07	1	SLC4A2
4.94209e-11	0.383221	0.68	0.449	4.651e-07	1	YIF1B
5.42173e-14	0.382812	0.784	0.49	5.10239e-10	1	SF3A1
8.2761e-12	0.382721	0.721	0.463	7.78864e-08	1	RASA1
9.97052e-13	0.382634	0.728	0.466	9.38326e-09	1	NMT1
5.04973e-11	0.38254	1	0.933	4.7523e-07	1	LMNA
1.25537e-11	0.381508	0.7	0.449	1.18143e-07	1	CTDNEP1
1.02333e-12	0.381115	0.838	0.541	9.63055e-09	1	UBAP2L
1.07955e-12	0.380876	0.963	0.628	1.01596e-08	1	SYNE2
3.82665e-14	0.380749	0.898	0.568	3.60126e-10	1	RBM5
6.11647e-14	0.380516	0.745	0.457	5.75621e-10	1	RALA
1.46573e-10	0.380338	0.691	0.457	1.3794e-06	1	SNF8
5.58643e-13	0.380058	0.758	0.481	5.25739e-09	1	NELFCD
6.60775e-15	0.379952	0.819	0.503	6.21855e-11	1	BLVRA
4.00289e-15	0.378808	0.89	0.553	3.76712e-11	1	ANAPC5
1.14858e-13	0.378682	0.786	0.49	1.08093e-09	1	BCAP29
6.05783e-13	0.378651	0.737	0.464	5.70102e-09	1	DUSP22
1.884e-11	0.37822	0.724	0.466	1.77303e-07	1	STAG2
6.29445e-12	0.377636	0.708	0.455	5.92371e-08	1	ALYREF
5.78363e-10	0.377636	0.67	0.444	5.44297e-06	1	GTPBP1
2.3519e-11	0.377048	0.713	0.465	2.21337e-07	1	TBRG1
2.82868e-12	0.376996	0.769	0.492	2.66207e-08	1	BMP2K
4.44207e-11	0.376752	1	0.925	4.18043e-07	1	CD99
5.72819e-13	0.376614	0.974	0.643	5.3908e-09	1	TRIOBP
3.23712e-13	0.375546	0.888	0.572	3.04645e-09	1	GTF2I
1.4015e-13	0.373585	0.767	0.479	1.31895e-09	1	CCDC85B
1.2634e-13	0.373535	0.851	0.524	1.18898e-09	1	ARAP1
1.25727e-09	0.372978	0.67	0.448	1.18322e-05	1	VAMP2
3.99649e-14	0.372046	0.827	0.517	3.7611e-10	1	CHURC1
3.09351e-12	0.371346	0.883	0.572	2.9113e-08	1	FAM174C
8.14369e-15	0.371258	0.879	0.547	7.66402e-11	1	DLC1
1.87804e-13	0.370725	0.801	0.502	1.76743e-09	1	JPT1
2.89975e-11	0.370695	0.693	0.45	2.72895e-07	1	TEAD1
3.60228e-14	0.370379	0.914	0.581	3.3901e-10	1	MATR3
4.73316e-14	0.369861	0.892	0.565	4.45437e-10	1	TUBB2A
8.06525e-14	0.369508	0.834	0.515	7.59021e-10	1	MSH2
1.70193e-12	0.369242	0.745	0.47	1.60169e-08	1	CLSTN1
1.00855e-14	0.369094	0.84	0.514	9.49149e-11	1	NABP1
8.76121e-14	0.369075	0.788	0.491	8.24517e-10	1	TPGS2
2.42121e-07	0.369046	0.983	0.73	0.0022786	1	SRSF2
6.01474e-12	0.368243	0.752	0.471	5.66047e-08	1	VPS53
6.75149e-12	0.367933	0.743	0.478	6.35382e-08	1	GPSM3
1.75871e-14	0.367684	0.855	0.53	1.65512e-10	1	NMRAL1
6.30126e-13	0.367535	0.795	0.5	5.93011e-09	1	GTF3A
3.82062e-12	0.367111	0.909	0.599	3.59559e-08	1	CCDC124
3.07567e-12	0.366727	0.765	0.486	2.89451e-08	1	LARP4
2.1189e-13	0.366579	0.775	0.484	1.9941e-09	1	IRAK1
3.98515e-11	0.365641	0.745	0.486	3.75042e-07	1	ORMDL1
2.12276e-14	0.36538	0.875	0.549	1.99773e-10	1	PRPF4B
6.21514e-15	0.363922	0.898	0.549	5.84907e-11	1	CDC42EP1
2.76447e-13	0.363542	0.812	0.511	2.60164e-09	1	PWP1
5.0496e-12	0.363206	0.706	0.444	4.75218e-08	1	TSPAN7
7.37926e-10	0.363129	0.998	0.687	6.94462e-06	1	HSPG2
1.93122e-10	0.361994	0.667	0.437	1.81747e-06	1	MANF
3.18036e-14	0.3604	0.803	0.498	2.99304e-10	1	MDM4
6.09192e-11	0.360291	0.691	0.444	5.73311e-07	1	SOAT1
3.90876e-11	0.360139	0.981	0.67	3.67854e-07	1	FKBP10
7.342e-12	0.359801	0.888	0.57	6.90955e-08	1	ILK
7.84401e-12	0.359648	0.721	0.46	7.382e-08	1	PLEKHA2
3.45592e-14	0.359577	0.849	0.538	3.25237e-10	1	PSMC4
4.92781e-14	0.359346	0.898	0.566	4.63756e-10	1	SLC39A7
7.05818e-14	0.359287	0.836	0.518	6.64245e-10	1	MFSD1
8.80501e-14	0.359279	0.914	0.586	8.2864e-10	1	CELF1
1.67222e-15	0.358481	0.834	0.506	1.57373e-11	1	DBN1
1.18025e-12	0.358383	0.853	0.553	1.11073e-08	1	IKBKB
3.35252e-08	0.358263	0.631	0.435	0.000315506	1	CYB5R1
1.35862e-12	0.35798	0.927	0.605	1.2786e-08	1	PRXL2A
4.47674e-11	0.357854	0.734	0.474	4.21306e-07	1	SNX9
6.02564e-13	0.357238	0.782	0.49	5.67073e-09	1	TIMM8B
1.80384e-11	0.357193	0.743	0.474	1.6976e-07	1	MXI1
5.38166e-11	0.356703	0.741	0.481	5.06468e-07	1	ARPC5L
5.24814e-12	0.356384	0.819	0.524	4.93903e-08	1	ZFYVE16
1.2761e-11	0.356122	0.76	0.488	1.20094e-07	1	LEMD2
7.20202e-09	0.355919	0.637	0.428	6.77783e-05	1	CAP1
1.11956e-12	0.355399	0.758	0.479	1.05362e-08	1	TMEM160
2.50724e-11	0.354945	0.749	0.479	2.35957e-07	1	GGA2
1.07751e-12	0.353651	0.756	0.478	1.01405e-08	1	ST3GAL4
1.82437e-11	0.353555	0.739	0.477	1.71691e-07	1	PAM
2.16288e-13	0.352804	0.851	0.527	2.03549e-09	1	ATIC
1.48083e-12	0.352546	0.78	0.494	1.39361e-08	1	DDX1
1.65547e-11	0.352402	0.698	0.446	1.55797e-07	1	NFKB2
2.0434e-13	0.352287	0.816	0.515	1.92304e-09	1	AGO1
1.3668e-12	0.351378	0.87	0.555	1.2863e-08	1	SUPT6H
2.94021e-12	0.351172	0.836	0.525	2.76703e-08	1	SENP3
9.02454e-13	0.350625	0.842	0.536	8.49299e-09	1	NDEL1
6.86803e-12	0.350444	0.94	0.605	6.4635e-08	1	MAP3K11
2.07792e-13	0.349613	0.892	0.566	1.95553e-09	1	PDCD6IP
3.39241e-10	0.349438	0.68	0.452	3.19259e-06	1	PSMD10
1.55314e-11	0.34893	0.767	0.494	1.46166e-07	1	ZMAT3
3.1926e-14	0.348165	0.801	0.492	3.00456e-10	1	ANAPC13
9.82028e-14	0.348144	0.812	0.506	9.24186e-10	1	GTPBP2
1.03701e-12	0.348061	0.762	0.475	9.75928e-09	1	SDF2L1
1.53903e-08	0.347917	0.631	0.431	0.000144838	1	STX4
2.09513e-13	0.347821	0.851	0.539	1.97172e-09	1	VPS36
5.50366e-14	0.347317	0.793	0.492	5.17949e-10	1	COX16
1.29228e-09	0.347102	0.667	0.448	1.21617e-05	1	ARL8A
5.34953e-14	0.346782	0.821	0.507	5.03444e-10	1	SLTM
7.2831e-10	0.346682	0.67	0.446	6.85412e-06	1	DPP9
1.99239e-07	0.345894	0.596	0.42	0.00187504	1	MAP4
1.73466e-08	0.34583	0.626	0.428	0.000163249	1	SPATA20
7.90269e-13	0.345696	0.935	0.605	7.43723e-09	1	TRA2A
5.97444e-13	0.345574	0.84	0.531	5.62254e-09	1	CHMP3
7.92748e-12	0.345369	0.771	0.49	7.46055e-08	1	AKIRIN1
7.00842e-13	0.34485	0.829	0.518	6.59563e-09	1	HSD17B10
1.0949e-11	0.344212	0.737	0.47	1.03041e-07	1	POLD2
4.96009e-13	0.343446	0.814	0.508	4.66794e-09	1	NDUFS3
4.26439e-13	0.343296	0.914	0.585	4.01322e-09	1	PSMD2
2.18144e-09	0.342404	0.67	0.448	2.05296e-05	1	SAFB2
2.79133e-10	0.341501	0.691	0.453	2.62692e-06	1	MFSD10
2.82659e-11	0.341095	0.959	0.644	2.66011e-07	1	EFTUD2
6.92804e-12	0.340714	0.73	0.46	6.51998e-08	1	NUDT5
2.70678e-12	0.340712	0.838	0.524	2.54735e-08	1	SEMA3C
2.16471e-12	0.340451	0.784	0.496	2.0372e-08	1	LSM12
1.10297e-12	0.340167	0.834	0.522	1.03801e-08	1	ACO2
2.96561e-13	0.339214	0.842	0.527	2.79093e-09	1	ATF6B
1.99456e-11	0.339115	0.749	0.484	1.87708e-07	1	RIT1
4.91539e-14	0.338915	0.898	0.553	4.62587e-10	1	CREBZF
3.90104e-10	0.338667	0.706	0.464	3.67127e-06	1	HACD3
8.32872e-09	0.338549	0.659	0.447	7.83816e-05	1	SNAP23
2.9345e-08	0.338483	0.629	0.436	0.000276166	1	BAD
6.05581e-12	0.338444	0.773	0.492	5.69912e-08	1	CDYL
5.39217e-09	0.338182	0.661	0.442	5.07457e-05	1	NSD2
1.49911e-10	0.337835	0.706	0.459	1.41081e-06	1	TMED4
3.49581e-12	0.337378	0.782	0.489	3.2899e-08	1	MYO1B
3.46064e-13	0.337347	0.907	0.576	3.25681e-09	1	SSBP1
2.15648e-08	0.33686	0.652	0.446	0.000202946	1	ABR
1.93467e-13	0.336806	0.816	0.505	1.82071e-09	1	VARS
2.04231e-12	0.336806	0.825	0.524	1.92202e-08	1	ZMIZ2
5.97031e-11	0.336315	0.965	0.646	5.61865e-07	1	ZEB2
8.8719e-13	0.335836	0.907	0.583	8.34934e-09	1	AP1M1
3.63888e-13	0.33559	0.842	0.524	3.42455e-09	1	GLS
4.69062e-12	0.334783	0.808	0.512	4.41435e-08	1	SURF1
4.16907e-12	0.334583	0.929	0.602	3.92351e-08	1	CLASP2
2.03786e-13	0.333799	0.821	0.513	1.91783e-09	1	RALB
5.90022e-12	0.333711	0.788	0.499	5.55269e-08	1	TP53
3.2921e-13	0.333689	0.907	0.581	3.0982e-09	1	RHOT2
2.22211e-08	0.332981	0.57	0.389	0.000209123	1	PECAM1
2.06326e-12	0.332659	0.952	0.619	1.94173e-08	1	SRRT
3.99851e-12	0.332334	0.808	0.509	3.763e-08	1	WDTC1
5.91543e-12	0.332287	0.816	0.514	5.56701e-08	1	TLK1
3.26626e-12	0.332226	0.782	0.492	3.07388e-08	1	IDH3G
2.84083e-12	0.332102	0.801	0.511	2.6735e-08	1	AMDHD2
1.69451e-12	0.331602	0.851	0.536	1.5947e-08	1	PTPA
6.55823e-12	0.331403	0.741	0.467	6.17195e-08	1	LSR
5.89738e-09	0.331371	0.648	0.433	5.55002e-05	1	STT3B
1.55812e-11	0.33121	0.855	0.549	1.46634e-07	1	LONP1
6.54495e-08	0.331051	0.633	0.438	0.000615945	1	ALDH9A1
2.87858e-08	0.331041	0.648	0.447	0.000270903	1	LARP4B
8.9538e-11	0.331032	0.687	0.441	8.42642e-07	1	ITGA6
4.93497e-12	0.330196	0.853	0.545	4.6443e-08	1	TMX2
5.04124e-13	0.330037	0.838	0.526	4.74431e-09	1	CEBPZ
6.37185e-11	0.32961	0.724	0.469	5.99655e-07	1	PAPOLA
3.09667e-12	0.329393	0.879	0.561	2.91428e-08	1	POLDIP2
5.28585e-13	0.329178	0.823	0.507	4.97451e-09	1	AAMP
2.03596e-07	0.328869	0.618	0.428	0.00191604	1	RAB35
3.5e-11	0.328827	0.929	0.611	3.29385e-07	1	APH1A
4.77711e-11	0.328599	0.756	0.48	4.49574e-07	1	CSK
2.86705e-12	0.328517	0.92	0.597	2.69818e-08	1	PSME1
1.88631e-09	0.328143	0.687	0.459	1.7752e-05	1	HK1
3.62149e-13	0.327603	0.933	0.593	3.40818e-09	1	RIC8A
1.01674e-07	0.327528	0.972	0.696	0.000956853	1	PRRC2B
3.60837e-13	0.327388	0.907	0.571	3.39583e-09	1	GSK3A
1.10448e-11	0.327274	0.786	0.502	1.03943e-07	1	CSE1L
1.08074e-11	0.327154	0.773	0.491	1.01709e-07	1	TRIB1
1.03768e-09	0.327093	0.695	0.459	9.76563e-06	1	USP14
2.92817e-11	0.326831	0.732	0.467	2.75571e-07	1	FN3K
5.16473e-14	0.326687	0.87	0.526	4.86053e-10	1	ID4
6.32336e-11	0.325477	0.713	0.459	5.95092e-07	1	RBM15B
1.84021e-11	0.32528	0.857	0.548	1.73183e-07	1	GET3
1.16085e-10	0.325112	0.737	0.479	1.09247e-06	1	BTBD1
9.16545e-12	0.32352	0.952	0.622	8.6256e-08	1	PRDX6
1.16516e-12	0.322821	0.829	0.52	1.09653e-08	1	AGAP3
5.17872e-12	0.322817	0.918	0.602	4.87369e-08	1	DUSP3
7.02125e-13	0.322597	0.855	0.538	6.6077e-09	1	BSCL2
1.01863e-08	0.322456	0.67	0.455	9.58632e-05	1	PITRM1
9.17816e-10	0.322172	0.683	0.452	8.63757e-06	1	ARIH1
8.96557e-14	0.32124	0.844	0.52	8.4375e-10	1	SELENON
2.64471e-10	0.32106	0.711	0.462	2.48894e-06	1	SREK1
6.65585e-11	0.32007	0.758	0.484	6.26382e-07	1	AGPAT1
1.55669e-12	0.319926	0.816	0.511	1.465e-08	1	GSK3B
7.19502e-12	0.319215	0.87	0.553	6.77124e-08	1	HIST1H2AE
1.05689e-07	0.318889	0.633	0.436	0.000994639	1	SMG1
9.37803e-08	0.318863	0.62	0.423	0.000882567	1	SLC25A13
1.71058e-11	0.317999	0.816	0.519	1.60983e-07	1	ALKBH5
2.27151e-13	0.317687	0.814	0.506	2.13772e-09	1	CDK16
1.90758e-11	0.317296	0.765	0.487	1.79523e-07	1	DCTN3
1.7774e-12	0.317293	0.873	0.552	1.67271e-08	1	DHPS
1.89e-10	0.317286	0.762	0.492	1.77868e-06	1	MTX2
1.79061e-10	0.317226	0.721	0.467	1.68515e-06	1	DDX49
2.67248e-08	0.317046	0.637	0.429	0.000251507	1	NAGK
8.01157e-35	6.51085	0.062	0	7.53969e-31	2	TNFSF14
2.08262e-16	6.01335	0.03	0	1.95996e-12	2	IGHD
5.35864e-33	5.98478	0.062	0.001	5.04302e-29	2	MCEMP1
6.9181e-10	5.73324	0.015	0	6.51062e-06	2	GREM1
6.91816e-10	5.51085	0.015	0	6.51068e-06	2	GABRD
2.26758e-21	5.34092	0.042	0.001	2.13402e-17	2	SPOCD1
6.71997e-12	4.92589	0.027	0.001	6.32416e-08	2	SELE
1.83042e-13	4.62633	0.03	0.001	1.72261e-09	2	ARMH1
6.80812e-12	4.51085	0.027	0.001	6.40713e-08	2	CARD10
2.61624e-11	3.92589	0.03	0.002	2.46214e-07	2	TSPAN18
7.80548e-07	3.92589	0.015	0.001	0.00734574	2	MT1H
2.64161e-11	3.80036	0.03	0.002	2.48602e-07	2	KIAA1755
2.7662e-13	3.77388	0.036	0.002	2.60327e-09	2	CCL21
2.20061e-08	3.73324	0.018	0.001	0.000207099	2	ESM1
7.2923e-10	3.66285	0.027	0.002	6.86279e-06	2	EXOC3L2
5.45731e-55	3.64316	0.208	0.023	5.13587e-51	2	OLR1
3.13467e-12	3.64209	0.039	0.004	2.95003e-08	2	IL6
7.05692e-08	3.60396	0.021	0.002	0.000664126	2	ADAMTSL1
1.28512e-60	3.41828	0.22	0.022	1.20942e-56	2	APOC2
3.51849e-112	2.91318	0.591	0.118	3.31125e-108	2	SDS
2.26284e-27	2.89841	0.131	0.02	2.12956e-23	2	MMP7
2.8951e-81	2.7338	0.703	0.235	2.72457e-77	2	MMP9
1.67243e-12	2.68885	0.068	0.012	1.57393e-08	2	SLC28A3
6.77949e-16	2.64271	0.139	0.039	6.38018e-12	2	INHBA
1.29306e-41	2.62891	0.249	0.048	1.2169e-37	2	MMP11
2.98382e-42	2.60079	0.237	0.043	2.80808e-38	2	MAPK13
4.17124e-22	2.59468	0.169	0.041	3.92555e-18	2	CXCL9
1.1775e-104	2.53204	0.694	0.176	1.10814e-100	2	POSTN
2.80548e-25	2.52253	0.24	0.072	2.64024e-21	2	MT1G
2.39371e-32	2.35885	0.214	0.045	2.25272e-28	2	PRAM1
1.80081e-62	2.35029	0.436	0.103	1.69474e-58	2	BCAT1
4.73688e-23	2.34687	0.181	0.045	4.45787e-19	2	ALOX5AP
8.64439e-29	2.34092	0.228	0.058	8.13523e-25	2	MARCO
4.17868e-19	2.32938	0.196	0.061	3.93255e-15	2	IGHM
5.5356e-66	2.28483	0.49	0.129	5.20955e-62	2	APOBR
2.89745e-42	2.25962	0.356	0.098	2.72679e-38	2	ALOX5
2.32375e-57	2.23478	0.418	0.103	2.18688e-53	2	SLAMF8
9.18486e-17	2.22357	0.139	0.037	8.64387e-13	2	HEYL
2.57349e-34	2.22134	0.261	0.064	2.42191e-30	2	PDLIM3
1.89415e-24	2.21317	0.187	0.045	1.78259e-20	2	HBEGF
4.20638e-32	2.21095	0.338	0.111	3.95863e-28	2	TREM1
4.93553e-59	2.19303	0.493	0.143	4.64483e-55	2	TGM2
8.18748e-20	2.17807	0.145	0.034	7.70523e-16	2	SLC22A15
1.97011e-17	2.16956	0.16	0.045	1.85407e-13	2	EPHB4
4.74506e-40	2.16689	0.288	0.066	4.46558e-36	2	NCKAP1L
1.04465e-34	2.16322	0.249	0.057	9.83123e-31	2	ABCG1
2.54653e-35	2.15677	0.312	0.088	2.39654e-31	2	MMP19
1.88949e-25	2.14162	0.196	0.048	1.7782e-21	2	CELSR1
9.45946e-26	2.13959	0.193	0.046	8.9023e-22	2	SLC29A3
2.33543e-50	2.13263	0.424	0.12	2.19787e-46	2	FLNB
5.95261e-41	2.11433	0.338	0.09	5.602e-37	2	PTGS1
6.81849e-35	2.11415	0.261	0.062	6.41688e-31	2	RBM38
1.10067e-27	2.11297	0.208	0.049	1.03584e-23	2	SLC37A2
2.54577e-20	2.10809	0.16	0.04	2.39582e-16	2	DPEP2
1.16095e-43	2.10235	0.365	0.1	1.09257e-39	2	FERMT3
2.83217e-25	2.09975	0.332	0.128	2.66535e-21	2	ANGPTL4
1.93821e-16	2.07108	0.131	0.033	1.82405e-12	2	SORL1
5.57712e-09	2.06606	0.071	0.019	5.24863e-05	2	CDH23
2.65236e-46	2.05728	0.415	0.122	2.49614e-42	2	SULF1
6.64764e-49	2.05014	0.448	0.137	6.2561e-45	2	GLIPR2
3.06591e-38	2.04487	0.315	0.082	2.88533e-34	2	RBM47
4.10841e-51	2.04136	0.412	0.109	3.86643e-47	2	ANKH
6.93851e-08	2.02777	0.059	0.015	0.000652983	2	STEAP3
9.39442e-19	2.02256	0.151	0.038	8.84109e-15	2	NLRP3
6.35981e-33	2.019	0.371	0.127	5.98522e-29	2	EGLN3
1.84939e-33	2.00626	0.38	0.134	1.74046e-29	2	SLC11A1
5.94744e-38	1.993	0.344	0.099	5.59713e-34	2	MYOF
2.09521e-10	1.98559	0.095	0.027	1.97181e-06	2	DCSTAMP
1.01714e-29	1.97711	0.243	0.062	9.57231e-26	2	RAB7B
1.9795e-11	1.97169	0.092	0.024	1.86291e-07	2	ALDH1B1
4.01108e-32	1.96205	0.273	0.072	3.77483e-28	2	WDFY4
3.6409e-27	1.96032	0.261	0.077	3.42645e-23	2	MS4A4A
2.46045e-32	1.95875	0.294	0.083	2.31553e-28	2	ALDH3B1
3.91135e-38	1.95434	0.335	0.093	3.68097e-34	2	RAB42
1.16703e-17	1.95337	0.151	0.04	1.09829e-13	2	TM6SF1
1.45503e-10	1.95013	0.086	0.023	1.36933e-06	2	AZIN2
5.64887e-15	1.93516	0.246	0.104	5.31615e-11	2	CHI3L1
2.76826e-44	1.92118	0.383	0.105	2.60521e-40	2	PFKP
2.68579e-62	1.91835	0.626	0.21	2.5276e-58	2	FGR
4.8214e-31	1.90811	0.291	0.084	4.53742e-27	2	PLAU
5.87043e-43	1.90531	0.409	0.123	5.52466e-39	2	PLXDC2
4.20978e-30	1.89732	0.267	0.073	3.96182e-26	2	HIC1
1.62343e-34	1.88785	0.326	0.096	1.52781e-30	2	CEBPA
9.34226e-58	1.88647	0.588	0.192	8.79201e-54	2	HMOX1
2.52722e-17	1.88562	0.154	0.042	2.37836e-13	2	PRKX
5.81174e-40	1.88088	0.365	0.105	5.46942e-36	2	ARID5A
4.12465e-35	1.88056	0.347	0.107	3.8817e-31	2	PTPN6
8.60595e-28	1.87635	0.451	0.199	8.09906e-24	2	SERPINE1
3.80422e-40	1.87558	0.386	0.117	3.58015e-36	2	ABCA1
1.45397e-59	1.87526	0.546	0.166	1.36833e-55	2	FAM20C
8.25386e-63	1.86767	0.558	0.165	7.7677e-59	2	METRN
4.4837e-16	1.86288	0.154	0.045	4.21961e-12	2	AGAP2
2.28739e-07	1.86176	0.062	0.018	0.00215266	2	GPR132
2.39891e-28	1.85912	0.264	0.075	2.25762e-24	2	SLC8B1
1.38227e-42	1.85896	0.427	0.137	1.30086e-38	2	VAC14
8.45482e-26	1.85672	0.27	0.085	7.95683e-22	2	FMNL1
1.25921e-34	1.85442	0.335	0.1	1.18504e-30	2	DOP1B
3.08139e-41	1.85342	0.404	0.125	2.8999e-37	2	GALM
2.87708e-23	1.85296	0.228	0.068	2.70762e-19	2	JCHAIN
3.73711e-12	1.85189	0.11	0.031	3.517e-08	2	CAMKK1
3.51891e-38	1.84841	0.371	0.113	3.31165e-34	2	ALDH16A1
4.98387e-10	1.841	0.092	0.027	4.69032e-06	2	ICAM5
5.35507e-36	1.84085	0.356	0.109	5.03965e-32	2	CLEC7A
2.14141e-09	1.83842	0.101	0.033	2.01528e-05	2	MATK
1.68084e-14	1.83688	0.148	0.045	1.58184e-10	2	ARHGAP22
1.42621e-36	1.83407	0.398	0.133	1.34221e-32	2	CD52
5.51212e-41	1.827	0.392	0.118	5.18746e-37	2	DHX34
7.80392e-28	1.82543	0.276	0.083	7.34426e-24	2	SEL1L3
8.62818e-32	1.82503	0.347	0.116	8.11998e-28	2	SPINT2
3.15973e-21	1.82279	0.217	0.066	2.97362e-17	2	CD300LB
1.44262e-28	1.82053	0.276	0.081	1.35765e-24	2	METTL1
3.24499e-18	1.82053	0.223	0.077	3.05386e-14	2	AFAP1L1
6.49096e-21	1.81524	0.199	0.057	6.10864e-17	2	GEM
8.68617e-11	1.81341	0.104	0.031	8.17455e-07	2	GPR35
3.59299e-15	1.80615	0.148	0.044	3.38136e-11	2	HAAO
6.38146e-12	1.80487	0.113	0.033	6.00559e-08	2	ARAP3
2.00946e-42	1.80437	0.415	0.128	1.8911e-38	2	CD84
4.17601e-33	1.80313	0.356	0.116	3.93005e-29	2	EGR2
9.98619e-22	1.79877	0.208	0.06	9.398e-18	2	SLC1A3
1.25018e-17	1.79464	0.178	0.053	1.17655e-13	2	NFAM1
8.28564e-10	1.79203	0.098	0.03	7.79761e-06	2	BCL6B
3.42355e-13	1.78838	0.128	0.037	3.2219e-09	2	SMAD7
7.47146e-13	1.7823	0.125	0.037	7.03139e-09	2	FAM83D
3.71204e-14	1.77813	0.142	0.043	3.4934e-10	2	RHOF
1.38584e-07	1.77388	0.074	0.023	0.00130421	2	GPR183
7.00009e-12	1.77061	0.122	0.037	6.58778e-08	2	RASL12
9.28433e-32	1.76908	0.341	0.111	8.73748e-28	2	ABCC1
8.72002e-79	1.76191	0.685	0.202	8.20641e-75	2	RNPEPL1
6.41323e-21	1.76177	0.226	0.071	6.03549e-17	2	CAPS
6.51673e-17	1.7615	0.169	0.05	6.13289e-13	2	ERV3-1
7.30434e-40	1.75693	0.418	0.136	6.87411e-36	2	MFHAS1
1.89525e-27	1.75596	0.291	0.092	1.78362e-23	2	DPYD
1.25588e-13	1.75256	0.136	0.041	1.18191e-09	2	HDHD5
2.92354e-17	1.7508	0.175	0.053	2.75134e-13	2	ELF4
5.83286e-33	1.74183	0.374	0.128	5.48931e-29	2	DOCK8
8.47792e-28	1.74146	0.294	0.092	7.97857e-24	2	TBXAS1
4.25516e-15	1.73826	0.154	0.047	4.00453e-11	2	CCDC120
5.24615e-28	1.7357	0.3	0.095	4.93715e-24	2	SUGP2
1.2195e-30	1.73502	0.365	0.128	1.14767e-26	2	CYTH4
3.10029e-14	1.73475	0.16	0.052	2.91768e-10	2	SNX20
8.45684e-36	1.73384	0.386	0.126	7.95873e-32	2	KLHL6
4.82745e-14	1.73324	0.154	0.05	4.54311e-10	2	HSD3B7
6.07877e-22	1.73124	0.24	0.077	5.72073e-18	2	KMT5C
6.92642e-35	1.72584	0.389	0.131	6.51846e-31	2	AKAP17A
9.41789e-30	1.72559	0.347	0.119	8.86318e-26	2	SLC31A2
9.7188e-19	1.72519	0.193	0.059	9.14636e-15	2	UNC13D
2.27982e-09	1.72425	0.122	0.045	2.14554e-05	2	SLAMF9
1.67387e-19	1.7226	0.208	0.065	1.57528e-15	2	MYO15B
3.9961e-13	1.72153	0.134	0.041	3.76073e-09	2	AGPAT4
2.04942e-10	1.71944	0.11	0.035	1.92871e-06	2	CCRL2
2.38983e-08	1.71778	0.083	0.026	0.000224907	2	TMEM198
7.18424e-19	1.71749	0.205	0.065	6.76109e-15	2	CAPN15
1.83069e-23	1.71532	0.264	0.086	1.72286e-19	2	ITGAM
4.26925e-10	1.71438	0.107	0.034	4.01779e-06	2	ATP2A3
1.65206e-11	1.71358	0.119	0.037	1.55476e-07	2	LTBP2
1.143e-09	1.71358	0.11	0.037	1.07567e-05	2	FAT1
2.18789e-08	1.70957	0.092	0.03	0.000205902	2	NFATC4
3.50948e-22	1.7055	0.261	0.089	3.30277e-18	2	FGD2
4.41658e-14	1.70349	0.148	0.046	4.15645e-10	2	FBXO41
2.99744e-11	1.70349	0.125	0.041	2.82089e-07	2	NRGN
1.30775e-26	1.70139	0.279	0.086	1.23072e-22	2	ARHGAP30
2.04632e-10	1.69323	0.113	0.036	1.92579e-06	2	ZNF517
1.15487e-20	1.69221	0.24	0.08	1.08685e-16	2	BX255925.3
9.55367e-25	1.69142	0.267	0.084	8.99096e-21	2	DPYSL3
7.49404e-23	1.68885	0.246	0.077	7.05264e-19	2	ADAMTS4
1.47934e-25	1.68628	0.297	0.1	1.39221e-21	2	IRF8
1.08317e-26	1.68226	0.294	0.094	1.01937e-22	2	ARHGAP39
9.57302e-19	1.67796	0.217	0.071	9.00917e-15	2	NES
4.64621e-10	1.67627	0.119	0.041	4.37255e-06	2	SEMA3F
1.93884e-47	1.67627	0.499	0.163	1.82464e-43	2	TNFAIP2
6.16484e-44	1.67534	0.454	0.145	5.80173e-40	2	ZNF219
8.74427e-15	1.67534	0.163	0.052	8.22923e-11	2	TENT5B
7.57637e-43	1.67063	0.475	0.162	7.13012e-39	2	APOC1
9.46702e-10	1.66955	0.104	0.033	8.90941e-06	2	TEDC2
3.99647e-23	1.66565	0.246	0.077	3.76108e-19	2	MERTK
3.99957e-25	1.66392	0.288	0.095	3.76399e-21	2	IL4R
2.24113e-22	1.66285	0.27	0.093	2.10912e-18	2	SMOX
4.01422e-39	1.66155	0.445	0.154	3.77778e-35	2	SLC26A11
5.03505e-23	1.66147	0.249	0.078	4.73849e-19	2	CCSER1
5.81347e-22	1.65986	0.427	0.198	5.47106e-18	2	IL1RN
4.78109e-07	1.6591	0.083	0.029	0.00449949	2	NCKAP5
5.11925e-10	1.6574	0.119	0.041	4.81772e-06	2	EEPD1
2.20036e-10	1.6567	0.113	0.036	2.07076e-06	2	E2F2
8.7797e-26	1.65458	0.306	0.105	8.26258e-22	2	ULK3
9.01401e-16	1.65458	0.202	0.072	8.48309e-12	2	HIST1H3G
2.81114e-11	1.65287	0.131	0.044	2.64556e-07	2	ADGRA2
2.58283e-18	1.65044	0.404	0.203	2.4307e-14	2	C15orf48
1.18019e-30	1.64578	0.353	0.119	1.11068e-26	2	NLGN2
7.59349e-32	1.64526	0.395	0.143	7.14623e-28	2	BAHCC1
1.01679e-14	1.64447	0.178	0.061	9.56897e-11	2	PTK2B
1.67325e-11	1.64385	0.128	0.041	1.57469e-07	2	ELMSAN1
5.80963e-09	1.63958	0.11	0.039	5.46744e-05	2	PSTPIP1
1.8492e-18	1.63776	0.24	0.087	1.74028e-14	2	KIAA1217
5.68174e-22	1.637	0.276	0.098	5.34708e-18	2	CAMK1
4.33767e-13	1.63521	0.154	0.052	4.08218e-09	2	CDC7
8.99354e-36	1.63386	0.407	0.138	8.46382e-32	2	ZNF692
2.55426e-31	1.63353	0.365	0.124	2.40381e-27	2	SLC38A6
1.31366e-23	1.63253	0.279	0.094	1.23628e-19	2	ITGA4
2.08422e-17	1.62965	0.196	0.063	1.96146e-13	2	BACH1
8.44458e-23	1.62927	0.255	0.082	7.94719e-19	2	ARHGAP4
3.42133e-09	1.62633	0.107	0.036	3.21981e-05	2	SH2D3C
4.41852e-07	1.62633	0.074	0.024	0.00415827	2	CFI
2.13311e-17	1.62386	0.199	0.065	2.00747e-13	2	DYSF
1.42161e-13	1.62386	0.184	0.068	1.33788e-09	2	TNF
3.33491e-07	1.62211	0.086	0.03	0.00313848	2	NPFF
2.67031e-46	1.62127	0.626	0.269	2.51303e-42	2	CD9
6.36023e-38	1.62064	0.436	0.151	5.98561e-34	2	DCHS1
1.70043e-23	1.61891	0.273	0.091	1.60028e-19	2	RAI1
6.29149e-14	1.61871	0.166	0.056	5.92092e-10	2	ASB2
1.54307e-33	1.61656	0.404	0.143	1.45218e-29	2	RGS19
1.45937e-38	1.61418	0.439	0.151	1.37341e-34	2	DISC1
5.71248e-45	1.61288	0.49	0.162	5.37601e-41	2	CORO1A
6.1897e-30	1.61286	0.35	0.119	5.82512e-26	2	KLHL36
1.35697e-20	1.61207	0.261	0.092	1.27704e-16	2	THBD
2.59974e-39	1.61119	0.424	0.138	2.44661e-35	2	PNPLA6
6.69235e-20	1.60396	0.249	0.087	6.29817e-16	2	PLBD1
7.58907e-16	1.60396	0.193	0.066	7.14207e-12	2	SEMA4D
2.22815e-12	1.5999	0.172	0.065	2.09691e-08	2	NREP
9.12003e-28	1.59939	0.335	0.116	8.58286e-24	2	IL17RD
6.84245e-12	1.59872	0.148	0.052	6.43943e-08	2	DOCK6
1.09694e-20	1.59852	0.258	0.091	1.03233e-16	2	CDH11
4.58685e-37	1.59796	0.433	0.152	4.31669e-33	2	DUSP1
8.81441e-16	1.59742	0.223	0.084	8.29524e-12	2	DDX3Y
4.85764e-30	1.59585	0.365	0.128	4.57153e-26	2	MMP17
1.23039e-51	1.59511	0.558	0.185	1.15792e-47	2	VASH1
5.01701e-17	1.59448	0.211	0.073	4.72151e-13	2	NOTCH3
1.23743e-13	1.59437	0.166	0.057	1.16454e-09	2	DENND3
5.10113e-17	1.59357	0.22	0.078	4.80067e-13	2	SLC8A1
8.90976e-21	1.59028	0.243	0.081	8.38498e-17	2	ADCK2
3.86992e-34	1.59012	0.421	0.153	3.64198e-30	2	CORO7
1.126e-16	1.58995	0.217	0.078	1.05968e-12	2	FBXL15
2.25834e-37	1.58668	0.418	0.141	2.12533e-33	2	COL16A1
6.15477e-23	1.58397	0.309	0.115	5.79225e-19	2	ACVRL1
1.19646e-14	1.58378	0.19	0.068	1.12599e-10	2	FES
8.17146e-13	1.58349	0.157	0.054	7.69016e-09	2	ADA
1.19904e-19	1.583	0.234	0.079	1.12841e-15	2	ZC3H7B
4.21966e-21	1.5815	0.27	0.096	3.97112e-17	2	ATG16L2
3.31261e-12	1.58106	0.145	0.049	3.1175e-08	2	DOK3
5.9136e-19	1.58093	0.237	0.083	5.56529e-15	2	PLEKHG3
5.49984e-30	1.57498	0.371	0.132	5.1759e-26	2	VPS13B
6.54376e-11	1.57481	0.136	0.048	6.15833e-07	2	UBASH3B
4.55612e-11	1.57225	0.131	0.044	4.28776e-07	2	SUCNR1
2.03983e-22	1.57013	0.353	0.148	1.91968e-18	2	OLFML2B
2.76107e-19	1.56793	0.24	0.084	2.59844e-15	2	FAM78A
7.70896e-22	1.5677	0.288	0.105	7.25491e-18	2	SH2B3
6.46784e-19	1.56656	0.255	0.094	6.08688e-15	2	RAB20
1.40964e-18	1.5653	0.228	0.078	1.32661e-14	2	NPIPB15
2.03643e-12	1.5647	0.157	0.055	1.91649e-08	2	TIGD5
6.72044e-11	1.56332	0.136	0.048	6.32461e-07	2	JAG2
2.47643e-24	1.56192	0.312	0.111	2.33057e-20	2	C8orf58
1.07374e-14	1.56089	0.184	0.064	1.0105e-10	2	ANO1
1.8308e-17	1.56043	0.258	0.101	1.72296e-13	2	MYO1G
1.08687e-27	1.55665	0.35	0.125	1.02286e-23	2	NPRL3
9.99376e-16	1.55479	0.202	0.071	9.40513e-12	2	NIBAN1
5.9126e-10	1.55392	0.136	0.051	5.56434e-06	2	MLH1
1.89814e-24	1.55361	0.297	0.102	1.78634e-20	2	IQGAP3
3.53077e-12	1.55243	0.169	0.063	3.32281e-08	2	TPPP3
1.914e-13	1.55207	0.184	0.068	1.80127e-09	2	TCF4
3.24482e-35	1.55137	0.427	0.152	3.0537e-31	2	GSDME
1.33561e-14	1.55038	0.199	0.073	1.25694e-10	2	FUOM
4.70071e-14	1.54892	0.193	0.071	4.42383e-10	2	ST6GAL1
9.40754e-07	1.54738	0.083	0.03	0.00885344	2	PCDH17
1.89992e-09	1.5448	0.119	0.042	1.78802e-05	2	GPC1
9.74738e-19	1.54364	0.24	0.085	9.17326e-15	2	STRA6
2.0364e-15	1.54288	0.205	0.074	1.91645e-11	2	FMNL2
3.47144e-20	1.53886	0.276	0.103	3.26697e-16	2	DGKQ
4.28604e-48	1.53886	0.543	0.184	4.03359e-44	2	DENND4B
2.15156e-12	1.53816	0.163	0.059	2.02483e-08	2	SERPINA1
4.63078e-19	1.53807	0.273	0.105	4.35803e-15	2	AKNA
2.06596e-20	1.53743	0.255	0.089	1.94428e-16	2	HPS6
8.92067e-47	1.53574	0.629	0.261	8.39524e-43	2	SLC15A3
1.80783e-24	1.53357	0.315	0.113	1.70135e-20	2	MYO1F
5.61879e-15	1.53265	0.202	0.074	5.28784e-11	2	PTAFR
7.32589e-22	1.53207	0.326	0.13	6.89439e-18	2	GK
1.65769e-17	1.5303	0.231	0.084	1.56005e-13	2	HEATR6
8.51042e-13	1.52996	0.16	0.056	8.00916e-09	2	BIN2
1.89418e-14	1.52813	0.181	0.063	1.78261e-10	2	ZFP41
8.7618e-25	1.52535	0.329	0.121	8.24573e-21	2	FMNL3
5.78203e-10	1.52216	0.134	0.049	5.44147e-06	2	IRF5
1.22065e-24	1.51907	0.341	0.13	1.14876e-20	2	ATG2B
4.10842e-15	1.51907	0.19	0.066	3.86643e-11	2	C16orf54
8.4912e-16	1.51871	0.199	0.069	7.99107e-12	2	KLHL14
8.43737e-11	1.5178	0.145	0.053	7.94041e-07	2	NOD1
7.71001e-25	1.51469	0.347	0.133	7.25589e-21	2	TSC22D3
1.5279e-12	1.51391	0.166	0.06	1.43791e-08	2	ISLR
2.23127e-27	1.51311	0.38	0.147	2.09985e-23	2	PREX1
5.11031e-26	1.51187	0.392	0.16	4.80931e-22	2	TNS3
6.97611e-41	1.51134	0.593	0.257	6.56522e-37	2	IFITM10
8.97062e-08	1.51085	0.101	0.037	0.000844225	2	GEMIN5
1.88471e-11	1.50757	0.154	0.057	1.7737e-07	2	MNDA
1.02627e-32	1.50598	0.401	0.14	9.65827e-29	2	ANGEL1
8.91524e-12	1.50139	0.16	0.059	8.39013e-08	2	ATP7A
9.66812e-12	1.50139	0.157	0.057	9.09867e-08	2	ZNF71
1.21311e-08	1.50139	0.11	0.039	0.000114166	2	CCDC40
1.87364e-12	1.50087	0.157	0.055	1.76328e-08	2	HIST1H2BM
1.35483e-07	1.50058	0.098	0.036	0.00127503	2	PPFIBP2
7.29164e-10	1.50028	0.139	0.053	6.86217e-06	2	RNFT2
9.74887e-38	1.49944	0.46	0.163	9.17466e-34	2	PIP5K1C
5.77959e-14	1.49919	0.202	0.077	5.43917e-10	2	SLFN11
2.01268e-17	1.49888	0.24	0.089	1.89413e-13	2	CSF2RB
6.27777e-15	1.49821	0.199	0.072	5.90801e-11	2	SLC27A3
9.40151e-08	1.49704	0.107	0.041	0.000884776	2	GNA15
5.39412e-59	1.49404	0.866	0.636	5.07641e-55	2	ITGAX
9.62167e-13	1.49293	0.166	0.059	9.05495e-09	2	ADCY4
1.92227e-19	1.49293	0.255	0.091	1.80905e-15	2	NUP133
1.39064e-10	1.49179	0.136	0.049	1.30873e-06	2	PRDM10
1.42858e-19	1.4905	0.252	0.089	1.34444e-15	2	ZNF213
9.29614e-24	1.48979	0.318	0.117	8.7486e-20	2	GIGYF1
6.77266e-07	1.48902	0.101	0.04	0.00637375	2	F3
2.46704e-27	1.48902	0.347	0.123	2.32173e-23	2	THOC6
1.06652e-18	1.48678	0.273	0.105	1.0037e-14	2	RTEL1
1.3142e-23	1.4866	0.315	0.114	1.23679e-19	2	KLF13
2.24183e-09	1.48531	0.145	0.059	2.10978e-05	2	OSCAR
1.51932e-22	1.48457	0.291	0.103	1.42983e-18	2	SLC25A19
7.71027e-32	1.48429	0.445	0.174	7.25614e-28	2	TREM2
2.13068e-08	1.48337	0.11	0.04	0.000200519	2	CRABP2
5.93343e-12	1.48294	0.172	0.066	5.58395e-08	2	SASH3
3.85e-28	1.4817	0.383	0.145	3.62323e-24	2	TESK1
1.31599e-10	1.4811	0.148	0.056	1.23848e-06	2	NLRX1
4.75937e-19	1.4799	0.267	0.1	4.47904e-15	2	PPRC1
1.34585e-12	1.4792	0.175	0.065	1.26658e-08	2	ZNF552
1.08825e-21	1.47843	0.323	0.129	1.02415e-17	2	RASGEF1B
1.27719e-07	1.47608	0.11	0.043	0.00120197	2	LPL
3.95003e-40	1.47595	0.484	0.168	3.71738e-36	2	TNFSF12
4.69679e-19	1.47557	0.273	0.104	4.42015e-15	2	SPICE1
4.69956e-25	1.47549	0.344	0.13	4.42276e-21	2	CAD
7.9773e-10	1.47523	0.169	0.071	7.50744e-06	2	APLNR
4.75259e-18	1.47478	0.231	0.081	4.47266e-14	2	CMKLR1
3.24636e-22	1.4746	0.309	0.116	3.05515e-18	2	EXTL3
9.1238e-12	1.47419	0.214	0.094	8.58641e-08	2	GBP5
7.11165e-12	1.4739	0.154	0.055	6.69278e-08	2	SWSAP1
5.01627e-31	1.47354	0.415	0.155	4.72081e-27	2	SH3BP1
1.25342e-35	1.47322	0.451	0.164	1.1796e-31	2	H6PD
1.80227e-24	1.47092	0.368	0.149	1.69612e-20	2	PPM1M
3.78114e-20	1.47052	0.273	0.1	3.55843e-16	2	KLC2
1.78169e-15	1.46982	0.208	0.075	1.67675e-11	2	HEG1
7.44555e-25	1.46861	0.335	0.124	7.00701e-21	2	FNDC10
2.20074e-25	1.46841	0.353	0.134	2.07111e-21	2	ABCA2
1.20802e-35	1.46808	0.433	0.15	1.13687e-31	2	ADPGK
1.38072e-10	1.46398	0.148	0.056	1.29939e-06	2	MC1R
4.1759e-27	1.46092	0.374	0.142	3.92994e-23	2	HIP1
5.53406e-12	1.45919	0.187	0.075	5.20811e-08	2	EPB41L1
1.67605e-24	1.45828	0.344	0.131	1.57733e-20	2	COG7
3.06332e-18	1.45811	0.258	0.097	2.88289e-14	2	PASK
4.61293e-18	1.45557	0.255	0.096	4.34123e-14	2	TRIM47
8.09162e-12	1.455	0.163	0.061	7.61502e-08	2	TBC1D30
5.22708e-32	1.45482	0.448	0.174	4.91921e-28	2	ARHGEF10L
1.42973e-20	1.45396	0.3	0.116	1.34552e-16	2	SH3PXD2A
1.49038e-28	1.45295	0.412	0.164	1.4026e-24	2	SLA
1.76867e-50	1.45217	0.588	0.204	1.66449e-46	2	EGR1
1.05795e-08	1.45196	0.125	0.048	9.95636e-05	2	ME3
1.85334e-41	1.45148	0.531	0.195	1.74417e-37	2	ZMIZ1
1.58739e-22	1.45144	0.312	0.116	1.49389e-18	2	CTNNA2
2.49436e-41	1.45077	0.573	0.23	2.34745e-37	2	MPP1
6.5322e-11	1.45015	0.169	0.068	6.14745e-07	2	NR4A3
7.95009e-11	1.44986	0.154	0.059	7.48183e-07	2	CEP41
3.98342e-37	1.44958	0.454	0.159	3.7488e-33	2	RHBDD3
6.12644e-13	1.44945	0.187	0.071	5.7656e-09	2	ARL4C
1.72623e-25	1.44835	0.371	0.146	1.62456e-21	2	PKD1
6.39881e-12	1.44784	0.163	0.06	6.02192e-08	2	URB2
1.26228e-11	1.44784	0.16	0.059	1.18793e-07	2	TTC5
1.0246e-21	1.44784	0.323	0.128	9.64253e-18	2	POLD1
3.643e-19	1.44715	0.285	0.111	3.42843e-15	2	P2RY11
1.14613e-09	1.44705	0.134	0.05	1.07862e-05	2	INAFM2
6.29307e-12	1.44545	0.172	0.066	5.92241e-08	2	ZNF526
6.14589e-14	1.44476	0.199	0.075	5.78389e-10	2	RDH10
9.67512e-29	1.44462	0.392	0.147	9.10526e-25	2	LZTS1
1.3363e-11	1.44435	0.154	0.056	1.2576e-07	2	C11orf95
2.76794e-30	1.44185	0.401	0.148	2.6049e-26	2	ACAD11
3.3427e-08	1.44046	0.113	0.043	0.000314582	2	EFNB1
2.53684e-13	1.43901	0.196	0.075	2.38742e-09	2	ITPKA
3.32448e-15	1.43779	0.211	0.078	3.12866e-11	2	ITGB3
2.42175e-25	1.4377	0.38	0.153	2.27911e-21	2	ZNF710
3.00575e-17	1.43584	0.249	0.095	2.82871e-13	2	RASSF2
4.07177e-16	1.43475	0.24	0.093	3.83195e-12	2	TMEM150A
1.49627e-10	1.43464	0.148	0.056	1.40814e-06	2	EXD2
5.03108e-17	1.43441	0.234	0.086	4.73475e-13	2	DOK2
5.32976e-20	1.43403	0.297	0.116	5.01584e-16	2	SLC43A2
1.29365e-09	1.43403	0.136	0.052	1.21746e-05	2	PYGL
7.27757e-23	1.43321	0.359	0.149	6.84892e-19	2	SAMHD1
4.73638e-16	1.43285	0.228	0.086	4.45741e-12	2	RAPGEF4
8.00452e-25	1.43173	0.374	0.152	7.53306e-21	2	PSRC1
7.00787e-17	1.43012	0.306	0.135	6.59511e-13	2	ANPEP
3.7503e-18	1.42777	0.264	0.101	3.52941e-14	2	ADCY3
7.20663e-08	1.42764	0.113	0.044	0.000678216	2	C19orf57
5.88848e-22	1.42665	0.288	0.103	5.54165e-18	2	LTBP4
1.88005e-11	1.42562	0.19	0.079	1.76932e-07	2	SPHK1
3.32956e-23	1.42505	0.374	0.157	3.13345e-19	2	RHBDF2
2.54917e-16	1.42256	0.261	0.107	2.39902e-12	2	CCNF
7.80125e-14	1.42212	0.193	0.071	7.34175e-10	2	DHRS13
1.44984e-15	1.42109	0.217	0.08	1.36444e-11	2	TCAF1
3.1121e-07	1.42109	0.104	0.041	0.00292879	2	LAT2
5.5797e-13	1.42065	0.181	0.067	5.25105e-09	2	TSEN2
3.41952e-11	1.42065	0.169	0.066	3.21811e-07	2	CCL24
8.62133e-27	1.42065	0.395	0.156	8.11353e-23	2	CC2D1A
1.24201e-16	1.42025	0.226	0.082	1.16885e-12	2	SH3TC1
3.68036e-08	1.41953	0.122	0.048	0.000346358	2	ARHGAP33
4.53867e-25	1.41893	0.356	0.136	4.27134e-21	2	CERK
1.63641e-07	1.41893	0.107	0.041	0.00154003	2	ITGB7
1.63641e-07	1.41893	0.107	0.041	0.00154003	2	ZNF41
8.29098e-22	1.41849	0.315	0.121	7.80264e-18	2	GASK1B
3.40531e-09	1.41789	0.172	0.077	3.20474e-05	2	HIST1H2BB
2.31037e-08	1.41774	0.125	0.049	0.000217429	2	CHD8
3.46608e-08	1.41687	0.113	0.043	0.000326193	2	TMEM144
6.14736e-14	1.41551	0.226	0.092	5.78528e-10	2	IL2RG
2.44192e-12	1.41344	0.184	0.071	2.29809e-08	2	AFAP1
5.60031e-10	1.41263	0.151	0.06	5.27045e-06	2	LMTK2
6.88626e-25	1.41236	0.362	0.141	6.48066e-21	2	MTHFD1
2.88595e-13	1.41236	0.196	0.075	2.71597e-09	2	TTC27
1.69749e-15	1.41131	0.231	0.09	1.59751e-11	2	ANTXR2
3.37756e-12	1.41131	0.19	0.076	3.17862e-08	2	ZFYVE26
1.0748e-10	1.41131	0.169	0.068	1.0115e-06	2	ACCS
6.15406e-10	1.41131	0.142	0.054	5.79158e-06	2	CTPS1
9.0335e-10	1.41131	0.139	0.053	8.50142e-06	2	SAPCD2
4.50703e-52	1.4109	0.774	0.399	4.24157e-48	2	TCIRG1
5.93343e-25	1.41025	0.362	0.141	5.58395e-21	2	POGZ
7.934e-22	1.40841	0.329	0.13	7.46669e-18	2	ZNF592
6.05538e-30	1.40727	0.493	0.213	5.69872e-26	2	EVL
2.57089e-10	1.40651	0.163	0.066	2.41947e-06	2	TBC1D8
1.70054e-18	1.40563	0.297	0.121	1.60038e-14	2	PCK2
3.29436e-12	1.40563	0.199	0.082	3.10032e-08	2	SLC12A7
5.24544e-10	1.40541	0.16	0.065	4.93648e-06	2	KCNE3
7.33973e-21	1.40381	0.383	0.171	6.90742e-17	2	CRIP2
1.86878e-27	1.40341	0.401	0.156	1.75871e-23	2	CIITA
1.93782e-18	1.40232	0.27	0.103	1.82369e-14	2	PLXNB1
2.26729e-09	1.40232	0.136	0.053	2.13375e-05	2	TTI2
2.26729e-09	1.40232	0.136	0.053	2.13375e-05	2	INTS5
2.1821e-23	1.40142	0.356	0.143	2.05358e-19	2	ATG7
2.04709e-08	1.4008	0.119	0.045	0.000192652	2	SOCS7
2.60472e-40	1.40028	0.522	0.19	2.4513e-36	2	TECPR1
3.10981e-23	1.39968	0.365	0.15	2.92664e-19	2	ABL1
1.32535e-20	1.39934	0.326	0.134	1.24728e-16	2	RIPOR1
9.82146e-54	1.39889	0.691	0.275	9.24298e-50	2	PXN
3.29764e-12	1.39826	0.202	0.083	3.10341e-08	2	SLCO3A1
7.39339e-19	1.39737	0.326	0.142	6.95792e-15	2	HCLS1
7.53248e-12	1.39719	0.172	0.066	7.08881e-08	2	FANCG
5.02013e-10	1.39719	0.163	0.067	4.72445e-06	2	ZC3H12A
8.50931e-13	1.39696	0.187	0.071	8.00811e-09	2	SPON2
1.91527e-14	1.396	0.231	0.094	1.80246e-10	2	LCP2
7.55884e-15	1.39537	0.226	0.088	7.11363e-11	2	NASP
3.0504e-08	1.39537	0.139	0.059	0.000287073	2	GUCY1A2
2.5502e-07	1.39537	0.104	0.04	0.0024	2	PHETA2
3.39086e-23	1.39537	0.306	0.109	3.19114e-19	2	OAF
2.83372e-12	1.3947	0.211	0.089	2.66681e-08	2	FAM107B
1.58911e-15	1.39404	0.231	0.089	1.49551e-11	2	PPP1R16A
8.21078e-18	1.39245	0.267	0.104	7.72717e-14	2	UFL1
1.57775e-21	1.39245	0.315	0.121	1.48482e-17	2	TNFAIP8L1
4.98612e-13	1.39177	0.205	0.082	4.69244e-09	2	FAM43A
5.05809e-31	1.39144	0.389	0.137	4.76016e-27	2	STAB1
8.41312e-47	1.39085	0.605	0.225	7.91759e-43	2	FASN
3.99696e-08	1.38983	0.116	0.045	0.000376154	2	TEF
1.64833e-43	1.38812	0.605	0.245	1.55125e-39	2	MAPK8IP3
4.26295e-07	1.38792	0.125	0.054	0.00401187	2	FILIP1L
2.09687e-08	1.38747	0.119	0.045	0.000197336	2	PLXDC1
8.7859e-27	1.38673	0.407	0.164	8.26841e-23	2	UHRF2
1.9398e-17	1.38658	0.279	0.114	1.82555e-13	2	SNX18
5.86653e-14	1.38652	0.211	0.082	5.52099e-10	2	SHPK
3.30797e-35	1.3862	0.457	0.168	3.11313e-31	2	EMILIN1
7.99942e-09	1.38532	0.128	0.049	7.52826e-05	2	IPO4
2.12186e-21	1.38495	0.323	0.128	1.99688e-17	2	SPAG5
1.09141e-10	1.38451	0.16	0.062	1.02713e-06	2	SUV39H1
8.52741e-09	1.38451	0.148	0.062	8.02515e-05	2	PIK3IP1
1.91471e-15	1.38309	0.223	0.084	1.80193e-11	2	CYP1B1
2.33243e-22	1.38285	0.341	0.136	2.19505e-18	2	SKIV2L
1.73963e-33	1.38257	0.433	0.155	1.63717e-29	2	ZBTB7B
4.21459e-15	1.38257	0.228	0.089	3.96635e-11	2	ZNF700
3.79867e-08	1.38227	0.145	0.063	0.000357493	2	FGD5
1.31743e-24	1.38206	0.395	0.165	1.23983e-20	2	SYK
4.16709e-46	1.38092	0.632	0.251	3.92164e-42	2	NCOR2
2.35104e-16	1.38082	0.276	0.116	2.21257e-12	2	CD86
2.76105e-32	1.38067	0.448	0.171	2.59843e-28	2	HIRA
6.64049e-07	1.38045	0.104	0.042	0.00624937	2	PPARGC1B
9.4977e-13	1.37792	0.214	0.089	8.93828e-09	2	RILP
6.72582e-08	1.37745	0.116	0.045	0.000632967	2	DYNC2H1
7.20272e-27	1.3756	0.852	0.822	6.77848e-23	2	FBP1
1.76501e-21	1.37421	0.386	0.169	1.66105e-17	2	ITGA5
3.72071e-12	1.37379	0.199	0.081	3.50156e-08	2	TRIP6
3.24389e-14	1.37335	0.214	0.083	3.05282e-10	2	GGACT
3.41642e-12	1.37335	0.202	0.083	3.21519e-08	2	ARHGAP25
2.94799e-13	1.37249	0.211	0.085	2.77435e-09	2	DHX58
1.29265e-12	1.37209	0.208	0.086	1.21651e-08	2	SCCPDH
1.25798e-19	1.37098	0.279	0.104	1.18389e-15	2	RIC8B
2.87956e-27	1.37092	0.401	0.157	2.70995e-23	2	CAMTA2
2.2643e-20	1.37076	0.312	0.123	2.13093e-16	2	WDR36
6.05679e-19	1.37076	0.303	0.123	5.70005e-15	2	NHSL1
9.46043e-07	1.36949	0.098	0.039	0.00890321	2	SIGLEC7
2.07988e-10	1.3684	0.154	0.06	1.95738e-06	2	SARM1
4.09146e-12	1.36789	0.196	0.08	3.85048e-08	2	COG4
3.28522e-16	1.36567	0.261	0.106	3.09172e-12	2	CDCA5
3.41028e-36	1.36499	0.528	0.211	3.20941e-32	2	SLCO2B1
1.03604e-10	1.36438	0.172	0.07	9.75018e-07	2	MBD5
5.83509e-15	1.36373	0.234	0.093	5.4914e-11	2	PRKAB2
5.9114e-26	1.36321	0.412	0.172	5.56322e-22	2	EFR3B
7.22652e-21	1.36312	0.341	0.143	6.80088e-17	2	ANKDD1A
9.18826e-22	1.36278	0.35	0.144	8.64707e-18	2	BAP1
2.25892e-08	1.36199	0.131	0.053	0.000212587	2	YBX1
1.69066e-23	1.36153	0.368	0.149	1.59108e-19	2	TBC1D24
9.18507e-09	1.35919	0.145	0.061	8.64407e-05	2	CAMK1D
2.16778e-19	1.35665	0.323	0.136	2.0401e-15	2	NACC2
5.44318e-18	1.35603	0.276	0.109	5.12257e-14	2	ZC3H3
2.41523e-88	4.82587	0.237	0.013	2.27297e-84	3	HBA1
5.45781e-08	4.70917	0.015	0	0.000513635	3	RFLNA
1.3116e-72	4.31368	0.371	0.067	1.23434e-68	3	HBA2
9.34931e-08	3.74982	0.02	0.002	0.000879863	3	LBP
1.03759e-106	3.55462	0.439	0.06	9.76472e-103	3	LYVE1
6.27935e-88	3.32439	0.412	0.066	5.90949e-84	3	SFRP4
1.82802e-110	3.2639	0.544	0.101	1.72035e-106	3	PLA2G2A
2.69066e-118	3.24408	0.55	0.092	2.53218e-114	3	CXCL14
1.85808e-78	3.17847	0.327	0.043	1.74864e-74	3	PI16
2.3601e-75	3.13227	0.453	0.102	2.22109e-71	3	F13A1
6.64141e-34	3.09822	0.143	0.018	6.25023e-30	3	RASD1
3.2769e-97	3.02691	0.488	0.087	3.08389e-93	3	CLEC3B
1.75075e-41	3.01918	0.173	0.022	1.64763e-37	3	ELN
2.63303e-95	2.99745	0.515	0.104	2.47795e-91	3	TNXB
5.94376e-73	2.98652	0.395	0.074	5.59368e-69	3	CCN5
4.58439e-55	2.87176	0.249	0.035	4.31436e-51	3	PLIN1
1.44536e-17	2.85291	0.079	0.011	1.36023e-13	3	PDPN
1.61072e-96	2.84068	0.69	0.231	1.51585e-92	3	TNC
3.81571e-43	2.81743	0.213	0.034	3.59096e-39	3	DPT
8.71178e-20	2.76752	0.102	0.017	8.19865e-16	3	CCL13
1.49298e-95	2.70941	0.635	0.189	1.40505e-91	3	IGFBP4
9.47996e-89	2.69232	0.632	0.208	8.92159e-85	3	LUM
1.32392e-43	2.68407	0.301	0.07	1.24594e-39	3	LOX
1.0293e-46	2.67799	0.292	0.062	9.68675e-43	3	MFAP5
2.92921e-39	2.64195	0.205	0.034	2.75668e-35	3	SFRP2
3.28751e-47	2.62171	0.254	0.044	3.09387e-43	3	PRG4
5.81512e-33	2.61036	0.178	0.031	5.47261e-29	3	TWIST2
4.40703e-59	2.58731	0.339	0.065	4.14746e-55	3	GPX3
8.74056e-113	2.57368	0.772	0.282	8.22574e-109	3	FBN1
1.37583e-33	2.54427	0.178	0.03	1.29479e-29	3	ACKR3
2.73028e-11	2.53925	0.067	0.014	2.56947e-07	3	FCGBP
6.37094e-42	2.52026	0.26	0.053	5.9957e-38	3	PTGIS
4.37744e-49	2.48201	0.295	0.058	4.11961e-45	3	PLIN4
9.00135e-133	2.44038	0.968	0.545	8.47117e-129	3	DCN
7.04827e-102	2.42986	0.652	0.164	6.63312e-98	3	CLU
3.83064e-73	2.42221	0.661	0.285	3.60501e-69	3	COL6A1
4.52001e-37	2.36045	0.26	0.059	4.25378e-33	3	SLIT3
1.26117e-31	2.32863	0.322	0.104	1.18688e-27	3	COL4A2
2.31959e-21	2.32713	0.132	0.026	2.18297e-17	3	GFPT2
1.47303e-27	2.32346	0.19	0.042	1.38627e-23	3	SPON1
2.14374e-24	2.31686	0.152	0.031	2.01747e-20	3	AKR1C2
2.8741e-33	2.31686	0.257	0.065	2.70482e-29	3	LILRB5
1.57637e-134	2.27079	1	0.773	1.48352e-130	3	COL1A1
2.26004e-60	2.26115	0.465	0.126	2.12693e-56	3	FBLN2
1.45691e-53	2.24753	0.43	0.12	1.3711e-49	3	CRIP1
1.94296e-135	2.22954	1	0.817	1.82852e-131	3	COL1A2
4.76563e-08	2.22375	0.053	0.012	0.000448494	3	SRPX2
1.47753e-21	2.19133	0.152	0.034	1.39051e-17	3	CRABP2
1.23333e-72	2.18725	0.655	0.255	1.16069e-68	3	CAVIN1
1.28104e-66	2.16445	0.626	0.256	1.20559e-62	3	S100A4
2.91163e-40	2.16174	0.365	0.11	2.74014e-36	3	CCDC80
4.01536e-52	2.15855	0.509	0.173	3.77886e-48	3	C3
1.10549e-31	2.14861	0.31	0.097	1.04037e-27	3	FBLN1
7.05434e-15	2.14283	0.105	0.024	6.63884e-11	3	THBS4
3.4152e-27	2.14218	0.234	0.064	3.21404e-23	3	RCN3
3.55237e-137	2.12638	1	0.848	3.34313e-133	3	COL3A1
8.45316e-26	2.10135	0.251	0.077	7.95527e-22	3	PDGFRA
5.38996e-35	2.09829	0.374	0.13	5.07249e-31	3	NNMT
8.04039e-25	2.08666	0.205	0.053	7.56681e-21	3	MXRA8
5.53375e-17	2.08327	0.137	0.035	5.20781e-13	3	F3
1.13036e-11	2.08079	0.085	0.02	1.06378e-07	3	SNED1
2.25943e-25	2.05224	0.234	0.068	2.12635e-21	3	CD209
9.56325e-11	2.02211	0.108	0.034	8.99998e-07	3	PPP1R14A
2.08212e-26	2.0037	0.319	0.116	1.95948e-22	3	CERCAM
1.84068e-53	2.00016	0.515	0.189	1.73226e-49	3	MYL9
3.71245e-40	1.9971	0.465	0.187	3.49379e-36	3	MMP2
1.81319e-22	1.99394	0.216	0.064	1.70639e-18	3	LMCD1
4.59714e-103	1.98826	0.982	0.644	4.32636e-99	3	PLTP
5.46963e-14	1.98428	0.12	0.032	5.14747e-10	3	STEAP1
2.11152e-26	1.96527	0.406	0.176	1.98716e-22	3	COL5A1
9.33576e-82	1.95774	0.871	0.528	8.78589e-78	3	COL6A2
1.69441e-52	1.95408	0.538	0.209	1.59461e-48	3	CCN2
6.6863e-22	1.94489	0.231	0.074	6.29247e-18	3	FOLR2
3.45344e-108	1.94457	0.953	0.592	3.25003e-104	3	FSTL1
9.77994e-13	1.94135	0.105	0.028	9.2039e-09	3	PCSK5
2.19885e-23	1.93424	0.222	0.065	2.06934e-19	3	KLF4
2.83411e-13	1.93381	0.173	0.063	2.66718e-09	3	CCL19
7.46807e-25	1.92012	0.266	0.086	7.0282e-21	3	HTRA1
8.6914e-15	1.91759	0.126	0.034	8.17947e-11	3	MFAP4
7.93998e-35	1.87915	0.38	0.131	7.47231e-31	3	ADIRF
1.39594e-17	1.86229	0.155	0.042	1.31372e-13	3	EFEMP1
7.71471e-23	1.85708	0.266	0.092	7.26031e-19	3	MRC2
1.72098e-14	1.84211	0.17	0.058	1.61962e-10	3	LOXL1
9.35294e-14	1.83769	0.126	0.036	8.80205e-10	3	LTBP2
5.62338e-46	1.81973	0.608	0.305	5.29216e-42	3	CFD
1.95775e-16	1.81281	0.155	0.045	1.84244e-12	3	SORBS1
6.88925e-16	1.80525	0.167	0.052	6.48347e-12	3	ALPL
8.49889e-22	1.80408	0.24	0.078	7.9983e-18	3	SOD3
7.00056e-19	1.80387	0.249	0.092	6.58823e-15	3	MT1E
1.317e-30	1.80205	0.45	0.212	1.23943e-26	3	THY1
1.21549e-10	1.7808	0.108	0.034	1.1439e-06	3	CREB3L1
4.66987e-20	1.77819	0.327	0.145	4.39482e-16	3	STAB1
6.87385e-10	1.77629	0.094	0.028	6.46898e-06	3	ADAMTSL4
2.70777e-18	1.7637	0.322	0.147	2.54828e-14	3	CCN1
1.63712e-18	1.75656	0.251	0.094	1.54069e-14	3	ANGPTL2
3.84703e-13	1.74982	0.129	0.038	3.62044e-09	3	SVEP1
1.67786e-10	1.7457	0.099	0.029	1.57903e-06	3	NFATC4
1.16895e-20	1.73815	0.307	0.127	1.1001e-16	3	ZFP36
7.40227e-21	1.72964	0.199	0.057	6.96627e-17	3	MGST1
9.06621e-32	1.72828	0.365	0.128	8.53221e-28	3	TAGLN
5.7074e-84	1.72586	0.924	0.586	5.37123e-80	3	C1R
7.84067e-18	1.71896	0.322	0.147	7.37886e-14	3	CD248
2.90548e-16	1.71172	0.187	0.062	2.73435e-12	3	HSPB6
1.12867e-21	1.69383	0.421	0.23	1.06219e-17	3	PCOLCE
3.27071e-11	1.67475	0.123	0.04	3.07806e-07	3	PTGER3
2.21578e-30	1.67214	0.491	0.248	2.08527e-26	3	ACTA2
7.46672e-16	1.67187	0.263	0.115	7.02693e-12	3	OAF
5.2162e-23	1.67011	0.456	0.264	4.90896e-19	3	VSIG4
4.7256e-19	1.66786	0.278	0.112	4.44726e-15	3	CRISPLD2
2.62627e-67	1.65373	0.947	0.613	2.47158e-63	3	COL6A3
9.26078e-13	1.63648	0.143	0.047	8.71532e-09	3	ASS1
3.23988e-07	1.63052	0.079	0.027	0.00304905	3	DKK3
5.94511e-11	1.6288	0.129	0.044	5.59494e-07	3	PLXDC1
5.25712e-10	1.61642	0.126	0.045	4.94748e-06	3	COL14A1
2.42466e-09	1.61059	0.105	0.035	2.28184e-05	3	LIPE
2.42406e-15	1.60773	0.281	0.128	2.28128e-11	3	EHD2
5.96527e-23	1.60479	0.418	0.218	5.61392e-19	3	CXCL12
7.37037e-23	1.60185	0.421	0.223	6.93626e-19	3	AHNAK
4.879e-28	1.59859	0.523	0.304	4.59162e-24	3	C1S
3.21974e-13	1.59425	0.415	0.279	3.0301e-09	3	THBS1
2.06721e-07	1.57989	0.181	0.095	0.00194545	3	PDGFA
3.31712e-20	1.55342	0.368	0.172	3.12174e-16	3	PRSS23
1.90855e-14	1.54803	0.406	0.255	1.79613e-10	3	PDGFRB
1.29031e-48	1.54111	0.684	0.376	1.21431e-44	3	FABP4
7.27013e-10	1.50791	0.123	0.043	6.84192e-06	3	VASN
2.10467e-14	1.49212	0.354	0.203	1.9807e-10	3	LAMA4
2.94831e-10	1.48678	0.158	0.063	2.77466e-06	3	SIGLEC1
1.79443e-10	1.47925	0.339	0.214	1.68874e-06	3	SERPINE1
9.17098e-14	1.46719	0.181	0.065	8.63081e-10	3	FGF7
4.19738e-12	1.45602	0.164	0.06	3.95015e-08	3	ISLR
3.89071e-08	1.44931	0.108	0.04	0.000366155	3	TMEM176B
5.52336e-07	1.44239	0.105	0.043	0.00519804	3	NEURL2
4.65391e-09	1.44169	0.345	0.237	4.37979e-05	3	TPM2
1.34721e-09	1.43119	0.167	0.072	1.26786e-05	3	CNN2
4.13646e-08	1.42538	0.149	0.067	0.000389283	3	MYLK
5.63753e-10	1.40705	0.164	0.068	5.30548e-06	3	LRRC32
7.24104e-12	1.39456	0.211	0.092	6.81454e-08	3	DPYSL3
1.83675e-16	1.38859	0.398	0.231	1.72857e-12	3	BGN
1.09008e-07	1.37257	0.12	0.049	0.00102587	3	COPZ2
8.22544e-11	1.36074	0.205	0.092	7.74096e-07	3	COL12A1
6.32235e-09	1.36025	0.129	0.05	5.94996e-05	3	FMOD
1.546e-07	1.35903	0.175	0.088	0.00145494	3	IGFBP6
2.91304e-65	1.34174	0.985	0.794	2.74146e-61	3	RNASE1
1.36075e-07	1.3394	0.12	0.049	0.0012806	3	OSMR
3.78371e-12	1.33898	0.339	0.189	3.56085e-08	3	AQP1
1.31806e-10	1.33888	0.231	0.112	1.24042e-06	3	CRIM1
1.05374e-12	1.33572	0.377	0.241	9.91676e-09	3	FCGR3A
9.56141e-14	1.32618	0.342	0.188	8.99824e-10	3	ADAMTS2
6.40859e-09	1.31974	0.284	0.166	6.03112e-05	3	COL5A2
1.61231e-16	1.288	0.348	0.167	1.51734e-12	3	TNS1
6.63053e-07	1.28747	0.17	0.087	0.00623999	3	ADAMTS4
1.39543e-08	1.27977	0.164	0.074	0.000131324	3	ARL4C
4.10772e-13	1.27681	0.354	0.202	3.86578e-09	3	SERPING1
2.7378e-09	1.27528	0.158	0.067	2.57655e-05	3	SNCG
8.35918e-09	1.27519	0.199	0.098	7.86683e-05	3	CDH11
2.56823e-08	1.27246	0.161	0.073	0.000241696	3	AXL
1.02286e-11	1.24753	0.348	0.207	9.62615e-08	3	CCL18
1.37893e-08	1.23147	0.193	0.094	0.000129771	3	CPXM1
4.61986e-07	1.2307	0.155	0.076	0.00434775	3	SPON2
1.29595e-07	1.21616	0.184	0.094	0.00121962	3	VCL
9.8715e-11	1.19892	0.228	0.108	9.29007e-07	3	JDP2
1.39309e-13	1.19851	0.482	0.378	1.31103e-09	3	VCAN
1.22159e-08	1.18242	0.287	0.171	0.000114963	3	DUSP1
2.29023e-69	1.18169	1	0.968	2.15534e-65	3	SPARC
5.40551e-07	1.1745	0.129	0.057	0.00508713	3	PALM
1.44071e-07	1.16485	0.289	0.181	0.00135585	3	MAF
4.50233e-08	1.16352	0.316	0.214	0.000423714	3	RUNX1
2.1137e-07	1.14606	0.295	0.189	0.0019892	3	EMILIN1
3.83404e-07	1.1448	0.295	0.197	0.00360821	3	SOCS3
1.05502e-11	1.14368	0.354	0.207	9.9288e-08	3	CD36
2.22408e-45	1.13164	0.904	0.63	2.09308e-41	3	TIMP3
1.06789e-09	1.12421	0.249	0.129	1.005e-05	3	GASK1B
1.10723e-08	1.10605	0.254	0.14	0.000104202	3	CAVIN3
3.46799e-15	1.09704	0.594	0.527	3.26372e-11	3	C1QC
1.06915e-20	1.09577	0.497	0.297	1.00618e-16	3	IGFBP5
2.6038e-07	1.09215	0.298	0.198	0.00245044	3	LY6E
7.67781e-07	1.08968	0.202	0.112	0.00722559	3	LAMB1
3.8657e-07	1.0742	0.512	0.47	0.00363801	3	COL4A1
4.7118e-07	1.07244	0.263	0.162	0.00443427	3	MYADM
4.9492e-32	1.03056	0.962	0.75	4.65769e-28	3	IGFBP7
1.90387e-07	1.00784	0.304	0.198	0.00179173	3	SELENOM
1.69139e-12	0.995516	0.643	0.58	1.59177e-08	3	CD163
3.20024e-07	0.994078	0.246	0.142	0.00301175	3	CPE
2.5825e-07	0.975376	0.295	0.188	0.00243039	3	TYMP
4.3544e-10	0.971981	0.512	0.453	4.09792e-06	3	PLEC
7.05366e-27	0.940881	0.798	0.604	6.6382e-23	3	FOS
9.64035e-09	0.939826	0.246	0.13	9.07254e-05	3	CRYAB
1.61803e-27	0.930292	0.787	0.601	1.52273e-23	3	ANXA1
6.9844e-07	0.924691	0.398	0.315	0.00657302	3	ARHGDIB
6.91389e-19	0.911	0.716	0.602	6.50666e-15	3	TGFBI
1.58407e-08	0.882166	0.488	0.431	0.000149077	3	ZFP36L2
4.54757e-11	0.882145	0.585	0.546	4.27972e-07	3	LRP1
2.36078e-30	0.87919	1	0.919	2.22173e-26	3	TIMP1
1.68488e-26	0.814357	0.924	0.752	1.58564e-22	3	SELENOP
5.75331e-24	0.812752	0.906	0.753	5.41444e-20	3	MCL1
2.36635e-09	0.810911	0.675	0.62	2.22697e-05	3	CD14
7.22475e-26	0.778029	0.886	0.717	6.79921e-22	3	HSPG2
1.64919e-31	0.752928	0.997	0.906	1.55205e-27	3	FCGRT
3.4541e-18	0.70771	0.836	0.694	3.25066e-14	3	ANXA2
1.3284e-07	0.706555	0.646	0.622	0.00125015	3	PNPLA2
1.31738e-07	0.691405	0.637	0.614	0.00123978	3	PRRX1
1.10042e-16	0.660576	0.883	0.751	1.03561e-12	3	AEBP1
2.06452e-08	0.648939	0.614	0.577	0.000194292	3	EMP1
9.20864e-23	0.614819	0.997	0.927	8.66625e-19	3	FLNA
5.23371e-12	0.611296	0.763	0.668	4.92544e-08	3	ASPH
3.00115e-09	0.586715	0.751	0.68	2.82438e-05	3	P4HB
2.84423e-09	0.586044	0.678	0.627	2.67671e-05	3	ZYX
1.04129e-15	0.56026	1	0.928	9.79958e-12	3	CD99
8.36643e-11	0.496466	0.968	0.817	7.87364e-07	3	LGMN
9.04363e-08	0.479229	0.749	0.673	0.000851096	3	RHOB
9.33904e-08	0.469414	0.766	0.654	0.000878897	3	APOD
8.04414e-12	0.468721	0.991	0.909	7.57034e-08	3	TAGLN2
3.60181e-07	0.441347	0.766	0.686	0.00338967	3	TRIOBP
4.32723e-10	0.434668	0.839	0.726	4.07235e-06	3	SH3BGRL3
9.90064e-09	0.428222	0.985	0.846	9.31749e-05	3	S100A9
8.94642e-11	0.416743	0.924	0.786	8.41948e-07	3	JUNB
1.88002e-07	0.415568	0.83	0.748	0.00176929	3	RNH1
4.61724e-07	0.398854	0.848	0.777	0.00434529	3	SCD
7.71194e-12	0.388334	0.991	0.786	7.25771e-08	3	TYROBP
3.19404e-08	0.372276	0.985	0.938	0.000300591	3	LMNA
5.55408e-07	0.363871	0.86	0.755	0.00522695	3	EHBP1L1
2.50504e-09	0.352109	0.991	0.951	2.35749e-05	3	LGALS1
2.20627e-09	0.345797	0.982	0.952	2.07632e-05	3	SERPINF1
9.08974e-11	0.309746	1	1	8.55436e-07	3	FN1
4.06979e-24	0.290546	1	1	3.83008e-20	3	S100A6
2.56419e-07	0.266214	0.977	0.823	0.00241316	3	LSP1
1.07777e-15	0.237051	1	1	1.01429e-11	3	ACTB
3.78638e-07	0.219842	0.997	0.996	0.00356336	3	GSN
6.81137e-07	-0.160458	0.991	0.997	0.00641018	3	SRRM2
5.85165e-07	-0.178321	1	1	0.00550699	3	HSPA8
9.66345e-07	-0.179884	0.383	0.586	0.00909427	3	BCL7C
3.918e-12	-0.188688	1	1	3.68723e-08	3	VIM
6.00382e-07	-0.190985	0.988	0.986	0.0056502	3	EIF4H
8.39905e-08	-0.193302	1	0.998	0.000790435	3	CD81
7.717e-07	-0.202658	0.351	0.561	0.00726247	3	SLC25A39
8.4697e-07	-0.206195	0.371	0.585	0.00797083	3	ARL2
9.54449e-08	-0.209045	0.357	0.582	0.000898232	3	GCN1
1.1032e-09	-0.210896	1	0.999	1.03822e-05	3	GNB1
9.75363e-08	-0.216437	0.997	0.994	0.000917914	3	S100A11
1.24487e-07	-0.217171	0.98	0.985	0.00117155	3	HDLBP
4.45376e-07	-0.218022	0.974	0.96	0.00419143	3	ERGIC3
3.03024e-18	-0.218501	1	1	2.85175e-14	3	RBM3
1.66815e-07	-0.220031	0.965	0.965	0.00156989	3	TMED9
4.02938e-11	-0.221838	1	0.999	3.79205e-07	3	GABARAP
4.95762e-07	-0.221897	0.991	0.991	0.00466562	3	SLC25A3
2.6243e-07	-0.223495	0.301	0.511	0.00246973	3	YIF1B
1.51738e-11	-0.225082	1	1	1.42801e-07	3	ANXA5
4.51875e-07	-0.225083	0.307	0.522	0.0042526	3	MOGS
3.78256e-17	-0.225939	1	1	3.55977e-13	3	CTSB
4.15563e-07	-0.230224	0.942	0.934	0.00391086	3	PEBP1
3.44862e-08	-0.237747	0.997	0.994	0.000324549	3	TLE5
6.67073e-07	-0.237941	0.971	0.96	0.00627783	3	PARK7
1.19759e-15	-0.239053	1	1	1.12705e-11	3	EIF4A1
5.96276e-08	-0.24307	0.947	0.949	0.000561156	3	SMARCE1
2.09791e-08	-0.244793	0.965	0.981	0.000197434	3	CDK4
8.49592e-08	-0.245717	0.977	0.989	0.000799551	3	NDUFB7
1.75734e-09	-0.246236	0.994	0.995	1.65384e-05	3	HNRNPA3
3.06902e-07	-0.248423	0.307	0.522	0.00288825	3	USP14
6.98619e-07	-0.248967	0.982	0.963	0.0065747	3	BANF1
3.74446e-07	-0.249244	0.956	0.945	0.00352391	3	CLCN7
4.57172e-07	-0.250827	0.336	0.55	0.00430244	3	CCDC85B
9.34145e-07	-0.253379	0.275	0.47	0.00879124	3	CCNY
8.48733e-09	-0.253962	0.965	0.975	7.98742e-05	3	RALY
6.28226e-08	-0.254064	0.971	0.983	0.000591224	3	CNN3
4.58393e-08	-0.254964	0.965	0.966	0.000431394	3	KHSRP
3.21926e-07	-0.261119	0.386	0.604	0.00302964	3	CLN6
1.60567e-08	-0.262672	0.944	0.965	0.000151109	3	TAF10
1.19437e-08	-0.265573	0.962	0.96	0.000112402	3	EDF1
1.14805e-10	-0.267347	0.991	0.993	1.08043e-06	3	TMBIM6
2.76547e-07	-0.26735	0.947	0.936	0.00260259	3	SON
9.75761e-13	-0.267354	0.994	0.998	9.18289e-09	3	SRSF3
6.08191e-07	-0.267643	0.974	0.976	0.00572369	3	HMGB1
8.53361e-09	-0.267917	0.98	0.968	8.03098e-05	3	NUCKS1
4.76345e-07	-0.271185	0.325	0.523	0.00448288	3	RBM15B
1.50174e-09	-0.272151	0.982	0.991	1.41329e-05	3	NONO
6.9064e-07	-0.272158	0.371	0.582	0.00649961	3	UBE2G2
3.64754e-07	-0.274364	0.36	0.567	0.0034327	3	QTRT1
8.87123e-11	-0.276106	0.977	0.99	8.34871e-07	3	UQCR11
1.98948e-10	-0.277665	0.994	0.989	1.8723e-06	3	LAMTOR4
9.3101e-09	-0.278896	0.953	0.961	8.76173e-05	3	HNRNPR
7.15354e-11	-0.279802	0.953	0.969	6.73219e-07	3	PSMB2
2.23224e-28	-0.280455	1	1	2.10076e-24	3	CD63
2.70601e-07	-0.281278	0.886	0.899	0.00254662	3	PRR13
3.30185e-10	-0.282168	0.936	0.959	3.10737e-06	3	C19orf53
9.07776e-10	-0.282742	0.98	0.978	8.54308e-06	3	TTC3
2.34229e-08	-0.28319	0.342	0.57	0.000220433	3	FUBP3
3.2716e-10	-0.283796	0.988	0.992	3.0789e-06	3	MICOS10
1.06121e-06	-0.284914	0.424	0.625	0.00998702	3	PRPF4B
3.26722e-07	-0.285315	0.386	0.6	0.00307479	3	GLS
1.76187e-11	-0.286055	0.991	0.995	1.65809e-07	3	PCBP1
2.80286e-07	-0.286154	0.325	0.525	0.00263777	3	VASP
5.2016e-07	-0.287128	0.98	0.976	0.00489522	3	UBB
1.72614e-10	-0.287392	0.985	0.981	1.62447e-06	3	RAC1
1.55614e-07	-0.287761	0.386	0.607	0.00146448	3	PTDSS1
7.86222e-09	-0.288463	0.95	0.977	7.39914e-05	3	HSPE1
1.00256e-06	-0.288928	0.322	0.511	0.00943505	3	AIF1
4.45004e-11	-0.289262	0.982	0.977	4.18794e-07	3	COPZ1
1.00092e-22	-0.289861	1	1	9.41962e-19	3	PABPC1
9.47449e-12	-0.291829	0.968	0.971	8.91644e-08	3	GSTO1
3.5516e-07	-0.292353	0.371	0.592	0.00334241	3	NRP2
8.02052e-08	-0.292857	0.377	0.602	0.000754811	3	UBE2B
7.04196e-07	-0.293159	0.363	0.56	0.00662719	3	SF3A1
3.16769e-07	-0.293979	0.921	0.932	0.00298111	3	HABP4
4.03058e-07	-0.295059	0.319	0.533	0.00379318	3	DIPK1B
5.85856e-07	-0.297013	0.471	0.661	0.00551349	3	SUPT5H
1.36435e-11	-0.297018	0.98	0.995	1.28399e-07	3	PSMB4
2.06059e-07	-0.297624	0.436	0.644	0.00193922	3	LEPROT
1.03361e-06	-0.298191	0.269	0.46	0.00972731	3	DCAF8
1.91908e-08	-0.298202	0.398	0.624	0.000180604	3	GET3
3.30865e-11	-0.298918	0.982	0.982	3.11377e-07	3	ATP5F1E
7.02988e-10	-0.298933	0.944	0.958	6.61582e-06	3	MITF
8.90143e-08	-0.299117	0.345	0.573	0.000837713	3	OSTF1
4.49617e-07	-0.299121	0.906	0.915	0.00423135	3	PYURF
2.82991e-10	-0.299254	0.959	0.95	2.66323e-06	3	M6PR
2.40978e-08	-0.299523	0.939	0.942	0.000226785	3	KHDRBS1
6.03538e-11	-0.300622	0.98	0.986	5.67989e-07	3	GPI
9.23493e-09	-0.30158	0.968	0.973	8.69099e-05	3	NDUFS5
4.76046e-13	-0.301765	0.994	0.994	4.48007e-09	3	DBI
2.98422e-11	-0.304479	0.977	0.977	2.80845e-07	3	G3BP2
8.9515e-09	-0.304682	0.371	0.601	8.42426e-05	3	VPS28
8.25788e-07	-0.305143	0.38	0.583	0.00777149	3	TM9SF3
4.14342e-10	-0.305536	0.962	0.95	3.89938e-06	3	SLC43A3
1.28597e-07	-0.30556	0.322	0.546	0.00121023	3	EIF4A3
4.97767e-14	-0.305804	0.991	0.995	4.68449e-10	3	RAB7A
5.86246e-08	-0.305985	0.31	0.527	0.000551716	3	HCFC1
2.77166e-07	-0.306101	0.354	0.572	0.00260841	3	SCARB2
6.30634e-10	-0.306772	0.959	0.944	5.9349e-06	3	NDUFA11
1.35783e-07	-0.306808	0.93	0.923	0.00127786	3	TYR
4.71205e-11	-0.307055	0.968	0.959	4.43451e-07	3	BAG6
1.10374e-07	-0.307289	0.357	0.57	0.00103873	3	GAB2
4.37234e-08	-0.307327	0.415	0.629	0.000411481	3	MINDY2
3.98247e-07	-0.308375	0.456	0.64	0.0037479	3	PDCD6IP
5.06452e-07	-0.309126	0.374	0.58	0.00476622	3	PLCG1
6.49305e-07	-0.309353	0.497	0.667	0.00611061	3	SMDT1
5.40862e-08	-0.309394	0.994	0.981	0.000509005	3	LAMP1
7.79709e-07	-0.310278	0.363	0.571	0.00733784	3	SRSF4
1.10385e-08	-0.310473	0.98	0.977	0.000103883	3	CTSL
2.49403e-07	-0.310548	0.936	0.926	0.00234713	3	SCARB1
1.23352e-07	-0.310697	0.462	0.657	0.00116087	3	MATR3
1.55815e-09	-0.312238	0.272	0.501	1.46637e-05	3	VKORC1
1.82112e-08	-0.3124	0.301	0.526	0.000171386	3	NUP42
1.47643e-09	-0.313916	0.942	0.953	1.38946e-05	3	CUTA
6.64215e-16	-0.314512	1	1	6.25092e-12	3	B2M
1.12352e-09	-0.31506	0.927	0.942	1.05735e-05	3	UQCRC1
5.33286e-07	-0.315081	0.304	0.504	0.00501875	3	DUSP23
3.50197e-12	-0.316111	0.997	0.992	3.2957e-08	3	CALM3
1.99366e-07	-0.316751	0.377	0.591	0.00187623	3	MSH2
8.64686e-08	-0.317223	0.371	0.587	0.000813756	3	LRRC59
7.61816e-17	-0.317364	1	1	7.16945e-13	3	ARPC2
9.39063e-09	-0.318712	0.924	0.933	8.83752e-05	3	RPN2
1.37518e-07	-0.319277	0.901	0.899	0.00129419	3	PRAME
2.524e-11	-0.319574	0.985	0.986	2.37534e-07	3	CAPG
5.59371e-11	-0.319613	0.936	0.958	5.26424e-07	3	ATP5PF
2.94067e-07	-0.31985	0.886	0.887	0.00276746	3	MEA1
7.7377e-08	-0.319948	0.848	0.878	0.000728195	3	KLHL24
6.44512e-09	-0.32186	0.377	0.606	6.0655e-05	3	SNX1
4.52161e-07	-0.321911	0.371	0.581	0.00425529	3	PSMC3
8.17166e-12	-0.322163	0.988	0.991	7.69035e-08	3	ARL6IP4
4.39353e-07	-0.323179	0.389	0.593	0.00413475	3	MFSD1
1.30926e-07	-0.323711	0.892	0.896	0.00123214	3	ERP29
2.65265e-12	-0.324124	0.977	0.98	2.49641e-08	3	ATP6V0B
3.21738e-12	-0.325622	0.985	0.99	3.02788e-08	3	PFDN5
2.53983e-13	-0.325629	0.971	0.984	2.39024e-09	3	LRPAP1
5.24932e-13	-0.325931	0.956	0.98	4.94013e-09	3	PTGES3
3.29193e-08	-0.326664	0.901	0.914	0.000309804	3	DDT
4.32258e-07	-0.326743	0.365	0.577	0.00406798	3	BABAM1
1.53469e-07	-0.326917	0.374	0.585	0.00144429	3	EMC10
2.89286e-11	-0.327997	0.933	0.944	2.72247e-07	3	CDC16
8.71668e-09	-0.328588	0.942	0.96	8.20327e-05	3	HIST1H4E
8.64527e-10	-0.329196	0.904	0.935	8.13606e-06	3	PSMB7
2.11359e-08	-0.329391	0.38	0.61	0.00019891	3	SUCLG1
1.37623e-07	-0.330421	0.357	0.574	0.00129517	3	ATP6AP2
9.05269e-08	-0.331392	0.368	0.585	0.000851949	3	PWP1
1.87599e-11	-0.331675	0.971	0.968	1.7655e-07	3	ARF4
1.15402e-07	-0.331869	0.319	0.539	0.00108605	3	ZC3H4
9.96623e-07	-0.332187	0.839	0.857	0.00937922	3	IVNS1ABP
9.11659e-07	-0.332545	0.289	0.483	0.00857962	3	TMEM214
2.00676e-07	-0.333108	0.871	0.885	0.00188856	3	ATP1B1
3.64976e-09	-0.333136	0.95	0.947	3.43479e-05	3	UGCG
1.20986e-08	-0.333369	0.956	0.969	0.000113859	3	UBL3
1.77125e-07	-0.333465	0.304	0.508	0.00166693	3	KIF1B
7.73034e-07	-0.333694	0.459	0.642	0.00727502	3	NRAS
4.27811e-07	-0.334178	0.576	0.713	0.00402613	3	ZFAND6
4.67835e-19	-0.335502	1	0.998	4.4028e-15	3	BSG
2.01128e-08	-0.335948	0.383	0.616	0.000189282	3	UBAP2L
8.31461e-19	-0.337042	0.997	1	7.82488e-15	3	CD44
6.65753e-09	-0.33718	0.921	0.915	6.2654e-05	3	CTSA
8.13274e-08	-0.338281	0.342	0.549	0.000765372	3	CSK
5.33715e-09	-0.338365	0.368	0.602	5.02279e-05	3	TAOK1
5.33444e-13	-0.339058	0.959	0.962	5.02025e-09	3	EIF3M
7.25934e-12	-0.339696	0.924	0.937	6.83176e-08	3	CLPTM1
1.65588e-07	-0.340207	0.38	0.58	0.00155835	3	SPRY4
1.02803e-06	-0.340381	0.52	0.679	0.00967476	3	BAG1
4.79049e-07	-0.341037	0.871	0.89	0.00450833	3	PRKD3
6.89922e-12	-0.341661	0.956	0.95	6.49286e-08	3	ATP5F1A
4.01011e-14	-0.342002	0.997	1	3.77391e-10	3	PMEL
4.84835e-12	-0.342954	0.956	0.957	4.56278e-08	3	TRMT112
4.88514e-09	-0.342976	0.865	0.912	4.59741e-05	3	STXBP1
5.96624e-07	-0.343487	0.892	0.892	0.00561483	3	AZIN1
5.37126e-07	-0.343487	0.339	0.53	0.00505489	3	HCFC1R1
4.06794e-08	-0.344036	0.348	0.57	0.000382834	3	DBNL
4.50884e-07	-0.344215	0.503	0.672	0.00424327	3	CDK2
1.50014e-07	-0.344491	0.395	0.602	0.00141178	3	DDX21
5.3772e-10	-0.344758	0.936	0.945	5.06049e-06	3	NDUFB10
8.27013e-08	-0.345221	0.447	0.643	0.000778302	3	ADD1
1.95162e-08	-0.345291	0.883	0.915	0.000183667	3	SLC29A1
1.4199e-07	-0.345328	0.901	0.896	0.00133627	3	TRIR
3.36508e-07	-0.345424	0.33	0.538	0.00316688	3	TAP1
3.46984e-08	-0.345815	0.456	0.661	0.000326546	3	ELOVL5
1.60443e-08	-0.346254	0.871	0.894	0.000150993	3	CBX3
8.90596e-07	-0.347001	0.266	0.453	0.0083814	3	CHCHD1
9.89781e-09	-0.347416	0.377	0.602	9.31483e-05	3	AK1
4.71637e-14	-0.347476	0.933	0.955	4.43858e-10	3	RNF5
6.55975e-07	-0.347734	0.541	0.688	0.00617338	3	SYAP1
1.05011e-10	-0.348291	0.982	0.993	9.88259e-07	3	ETV5
6.42474e-15	-0.348365	0.953	0.968	6.04633e-11	3	TXNL4A
2.08176e-07	-0.348724	0.465	0.659	0.00195914	3	XRCC6
2.49564e-08	-0.349089	0.377	0.592	0.000234864	3	ANP32A
5.71755e-08	-0.349118	0.857	0.882	0.000538079	3	TRAK2
3.11886e-07	-0.349169	0.325	0.53	0.00293516	3	VEGFA
7.77408e-14	-0.349732	0.962	0.983	7.31618e-10	3	SLC25A4
5.10666e-10	-0.350514	0.936	0.94	4.80588e-06	3	CYP27A1
8.61309e-09	-0.350722	0.368	0.599	8.10578e-05	3	ZMIZ2
3.92723e-20	-0.35183	1	1	3.69592e-16	3	BRI3
3.96822e-07	-0.35199	0.342	0.548	0.00373449	3	INCENP
2.08632e-07	-0.352872	0.368	0.581	0.00196344	3	MAPKAPK2
9.17483e-07	-0.353465	0.272	0.458	0.00863443	3	BHLHE40
5.06375e-17	-0.353498	0.985	0.995	4.76549e-13	3	AP2S1
2.90604e-08	-0.35352	0.392	0.615	0.000273487	3	VPS36
2.11906e-20	-0.353639	1	0.999	1.99425e-16	3	PPDPF
5.3813e-13	-0.353701	0.95	0.964	5.06434e-09	3	TRIB2
5.96887e-11	-0.353725	0.942	0.972	5.61731e-07	3	HSPD1
5.34967e-08	-0.354057	0.281	0.498	0.000503458	3	ROCK1
1.12806e-09	-0.354149	0.348	0.597	1.06162e-05	3	AKT3
2.72742e-21	-0.355368	0.997	0.999	2.56677e-17	3	VAT1
9.67488e-08	-0.355568	0.43	0.631	0.000910503	3	MCM6
4.60423e-07	-0.355688	0.251	0.443	0.00433304	3	ECPAS
9.03684e-11	-0.356006	0.363	0.611	8.50457e-07	3	TBC1D14
3.91255e-07	-0.35706	0.588	0.718	0.0036821	3	MORF4L2
6.3504e-07	-0.357743	0.237	0.424	0.00597636	3	PCMTD2
3.81751e-16	-0.357999	0.994	0.999	3.59266e-12	3	QPCT
1.24473e-18	-0.358596	0.991	0.996	1.17142e-14	3	ATP5F1B
4.2412e-08	-0.359314	0.918	0.916	0.00039914	3	MTPN
1.49577e-07	-0.359632	0.281	0.473	0.00140767	3	DDIT4
6.58719e-08	-0.359688	0.98	0.984	0.00061992	3	APCDD1
2.60426e-09	-0.36135	0.357	0.588	2.45087e-05	3	UBP1
3.06646e-08	-0.361371	0.301	0.513	0.000288585	3	ST5
1.96705e-09	-0.361481	0.363	0.6	1.85119e-05	3	CBFB
1.00497e-07	-0.362073	0.281	0.486	0.000945779	3	WDR43
5.28302e-07	-0.362092	0.544	0.688	0.00497185	3	SMAD2
1.61283e-07	-0.362257	0.272	0.477	0.00151783	3	QRICH1
4.79834e-08	-0.362612	0.336	0.563	0.000451571	3	CCAR2
1.85979e-14	-0.362914	0.95	0.976	1.75025e-10	3	BRK1
1.38019e-34	-0.364078	1	1	1.2989e-30	3	GSTP1
1.81679e-08	-0.364514	0.871	0.882	0.000170978	3	POLR2I
1.1644e-07	-0.365591	0.874	0.884	0.00109581	3	UBE2I
2.03315e-07	-0.365687	0.319	0.529	0.0019134	3	SEMA4C
1.90145e-16	-0.366756	0.982	0.997	1.78946e-12	3	APOE
3.03828e-09	-0.366923	0.491	0.689	2.85932e-05	3	NRIP1
2.71361e-08	-0.367543	0.898	0.906	0.000255378	3	NQO1
1.75339e-09	-0.368806	0.915	0.921	1.65011e-05	3	NDUFB9
4.12476e-13	-0.369027	0.962	0.977	3.88182e-09	3	TBC1D7
3.6365e-08	-0.369167	0.313	0.525	0.000342231	3	SLC4A2
4.80325e-07	-0.369449	0.643	0.742	0.00452034	3	SH3GLB1
2.732e-08	-0.37002	0.333	0.558	0.000257109	3	SAR1A
2.1446e-07	-0.370022	0.57	0.718	0.00201829	3	TSC22D1
6.52974e-08	-0.370347	0.582	0.727	0.000614514	3	PRKAR2A
2.19099e-11	-0.371023	0.895	0.939	2.06194e-07	3	CSNK2B
3.89245e-09	-0.37109	0.825	0.869	3.66318e-05	3	CKMT2
6.4094e-07	-0.371199	0.506	0.66	0.00603189	3	UBE2V1
2.75169e-13	-0.372774	0.921	0.951	2.58961e-09	3	BACE2
1.3272e-08	-0.372884	0.398	0.617	0.000124903	3	NCSTN
1.32382e-07	-0.373075	0.354	0.563	0.00124584	3	C7orf50
1.01714e-11	-0.37318	0.962	0.958	9.57233e-08	3	GOLM1
1.79367e-07	-0.373815	0.781	0.834	0.00168803	3	KIT
5.50486e-10	-0.374058	0.351	0.599	5.18062e-06	3	AGAP3
1.87283e-20	-0.374108	0.994	0.998	1.76252e-16	3	EIF4B
1.87018e-11	-0.374617	0.915	0.942	1.76002e-07	3	NAP1L4
2.65286e-08	-0.374992	0.784	0.835	0.000249661	3	STX3
1.24908e-07	-0.375161	0.251	0.444	0.00117551	3	TELO2
3.03777e-08	-0.375205	0.421	0.635	0.000285884	3	MAP2K1
1.24579e-17	-0.375235	0.997	0.995	1.17242e-13	3	DEK
1.04768e-17	-0.375771	0.994	0.996	9.8597e-14	3	COX8A
2.6487e-08	-0.376696	0.509	0.678	0.000249269	3	TBC1D4
8.13183e-09	-0.377693	0.342	0.57	7.65286e-05	3	MED24
4.90188e-10	-0.379845	0.342	0.588	4.61316e-06	3	ZMPSTE24
8.80841e-09	-0.380663	0.851	0.881	8.2896e-05	3	PCNA
6.95342e-08	-0.380975	0.357	0.571	0.000654387	3	ECHS1
4.45348e-14	-0.381059	0.942	0.973	4.19117e-10	3	BIRC7
3.46222e-08	-0.381874	0.313	0.527	0.00032583	3	DAD1
8.49757e-17	-0.382149	0.982	0.988	7.99706e-13	3	CAPNS1
2.58765e-10	-0.382261	0.351	0.597	2.43524e-06	3	HSD17B10
4.03308e-07	-0.383147	0.281	0.478	0.00379553	3	AKT1
2.67432e-07	-0.383237	0.368	0.572	0.00251681	3	RENBP
2.3883e-15	-0.383273	0.959	0.976	2.24763e-11	3	PTTG1IP
1.81004e-07	-0.384247	0.281	0.477	0.00170343	3	SELENOW
2.62285e-08	-0.385804	0.304	0.513	0.000246836	3	RTCB
9.19776e-08	-0.385864	0.263	0.469	0.000865601	3	DHX9
1.23164e-08	-0.386196	0.316	0.549	0.000115909	3	CCDC12
9.06189e-15	-0.38636	0.965	0.971	8.52815e-11	3	RHOBTB3
1.02535e-17	0.512175	0.973	0.782	9.64959e-14	4	TYROBP
5.77438e-14	0.48536	0.893	0.789	5.43427e-10	4	CTSC
1.6149e-15	0.458139	0.863	0.715	1.51978e-11	4	HLA-DMA
4.63009e-09	0.439547	0.811	0.732	4.35738e-05	4	GRN
3.45724e-08	0.361763	0.92	0.834	0.000325361	4	RNF130
2.78148e-15	0.358166	1	0.872	2.61765e-11	4	LYZ
3.16553e-07	0.331192	0.882	0.784	0.00297908	4	ENO2
1.8662e-13	0.326888	1	0.963	1.75628e-09	4	NPC2
4.59624e-13	0.312678	1	0.889	4.32553e-09	4	HLA-DRA
1.40528e-07	0.308223	0.884	0.776	0.00132251	4	CTSS
3.23741e-09	0.29333	0.979	0.842	3.04673e-05	4	GDF15
3.11664e-27	0.289999	1	1	2.93307e-23	4	CTSD
9.91248e-07	0.288585	0.991	0.953	0.00932864	4	ECM1
1.6175e-07	0.28155	0.989	0.88	0.00152223	4	HLA-DPA1
2.30077e-09	0.275122	0.998	0.955	2.16526e-05	4	CD68
8.66884e-08	0.264324	0.984	0.848	0.000815824	4	LIPA
2.58185e-21	0.252221	1	1	2.42978e-17	4	FTL
1.27007e-20	0.23425	1	1	1.19526e-16	4	UBA52
1.03786e-06	0.233194	0.982	0.824	0.00976728	4	HLA-DPB1
1.73956e-07	0.196574	1	0.987	0.0016371	4	TFRC
2.07623e-08	0.189941	1	0.931	0.000195394	4	CD74
4.62063e-11	0.180685	1	0.981	4.34848e-07	4	FTH1
1.59306e-10	0.17452	1	1	1.49923e-06	4	B2M
5.19875e-11	0.141537	1	1	4.89254e-07	4	UBC
1.71481e-09	0.114947	1	1	1.6138e-05	4	PSAP
8.48767e-07	-0.146807	0.333	0.532	0.00798775	4	SREK1
4.34095e-07	-0.149118	1	0.999	0.00408527	4	COX6A1
4.39717e-09	-0.161111	1	1	4.13818e-05	4	ANXA5
2.1401e-07	-0.171868	0.995	0.997	0.00201405	4	CTNNB1
4.6484e-07	-0.172115	0.253	0.436	0.00437461	4	ZNF655
2.04953e-07	-0.176387	0.333	0.535	0.00192881	4	RASA1
8.46778e-07	-0.178931	0.303	0.496	0.00796903	4	C11orf24
2.32469e-13	-0.179246	1	1	2.18776e-09	4	EEF2
6.73223e-07	-0.181708	0.995	0.989	0.0063357	4	LAMTOR4
6.4376e-08	-0.181798	0.301	0.502	0.000605843	4	TMEM263
3.04641e-09	-0.183648	1	0.998	2.86697e-05	4	BSG
2.71506e-10	-0.187806	1	0.999	2.55514e-06	4	DDX5
9.82776e-14	-0.189521	1	1	9.2489e-10	4	CTSB
9.4045e-07	-0.19076	0.221	0.395	0.00885058	4	SLAIN2
6.41337e-07	-0.190845	0.998	0.993	0.00603563	4	DBI
8.13421e-07	-0.191156	0.271	0.46	0.0076551	4	CHID1
3.94892e-08	-0.198737	0.998	0.994	0.000371633	4	RAB7A
6.01249e-08	-0.199929	0.979	0.967	0.000565836	4	ARHGDIA
3.4509e-08	-0.20016	0.995	0.985	0.000324764	4	EIF4H
4.5199e-08	-0.201655	0.998	0.989	0.000425368	4	ARL6IP4
7.50194e-07	-0.201825	0.417	0.617	0.00706008	4	PSMD14
1.05711e-07	-0.202478	0.993	0.961	0.000994846	4	PPIB
5.20584e-07	-0.203194	0.993	0.979	0.00489922	4	TSPO
6.68774e-07	-0.203555	0.97	0.939	0.00629383	4	B4GALT5
5.15338e-07	-0.207243	0.982	0.938	0.00484985	4	POLR2L
9.71086e-15	-0.207687	1	1	9.13889e-11	4	ACTB
4.67284e-09	-0.208318	0.998	1	4.39761e-05	4	IFITM3
5.98621e-07	-0.209193	0.385	0.577	0.00563362	4	PRPF40A
1.20513e-07	-0.210012	0.312	0.512	0.00113415	4	DPP9
3.33348e-08	-0.210136	0.991	0.965	0.000313714	4	ACTR3
3.61256e-08	-0.211635	0.298	0.504	0.000339978	4	AP1S1
4.93575e-07	-0.212611	0.979	0.94	0.00464504	4	SNRPC
7.01651e-07	-0.212952	0.319	0.513	0.00660324	4	KIF1B
5.27725e-08	-0.21397	0.991	0.967	0.000496642	4	GSTO1
2.10799e-11	-0.215458	1	0.999	1.98383e-07	4	VAT1
5.37809e-08	-0.215593	0.264	0.461	0.000506132	4	CHCHD1
6.21844e-08	-0.216906	0.991	0.952	0.000585217	4	USP22
1.69532e-07	-0.217941	1	0.992	0.00159547	4	HNRNPA2B1
3.4316e-07	-0.21889	0.305	0.498	0.00322948	4	RASA2
3.22432e-07	-0.219443	0.346	0.544	0.00303441	4	TRAK1
4.65617e-08	-0.22049	0.317	0.53	0.000438192	4	CIAO2A
1.96804e-07	-0.220793	0.387	0.59	0.00185213	4	SURF1
1.0667e-08	-0.223934	0.998	0.993	0.000100387	4	TLE5
3.49277e-07	-0.225791	0.984	0.949	0.00328704	4	C4orf48
6.81452e-07	-0.226525	0.185	0.342	0.00641315	4	TMED5
2.01905e-07	-0.227754	0.321	0.519	0.00190013	4	ARIH1
1.29549e-08	-0.229609	0.995	0.972	0.000121919	4	TBC1D7
3.02886e-07	-0.230782	0.989	0.971	0.00285046	4	HSPE1
7.66406e-07	-0.231276	0.308	0.489	0.00721265	4	CAP1
4.77976e-09	-0.232309	0.282	0.495	4.49823e-05	4	TMEM126B
7.03877e-08	-0.233118	0.991	0.95	0.000662419	4	SERPINF1
7.73784e-07	-0.233952	0.296	0.484	0.00728208	4	SMIM26
2.42977e-10	-0.234044	0.998	0.992	2.28665e-06	4	PSMB4
2.09956e-07	-0.234632	0.38	0.577	0.0019759	4	FBXW2
1.81525e-07	-0.235946	0.369	0.575	0.00170833	4	FUBP3
1.18647e-07	-0.236853	0.328	0.525	0.00111659	4	ALYREF
8.22903e-08	-0.23764	0.405	0.61	0.000774434	4	MMADHC
5.04361e-08	-0.23844	0.39	0.597	0.000474655	4	NABP1
2.3007e-07	-0.239157	0.351	0.554	0.00216519	4	FDX1
6.87628e-07	-0.240964	0.426	0.615	0.00647127	4	SQOR
1.44153e-19	-0.241932	1	1	1.35662e-15	4	EIF4A1
3.0769e-07	-0.242257	0.278	0.471	0.00289567	4	AKIRIN2
5.54931e-07	-0.242579	0.995	0.959	0.00522246	4	ARPC1B
1.04432e-07	-0.24379	0.319	0.532	0.000982811	4	NUP42
1.59051e-13	-0.243817	1	1	1.49683e-09	4	HSPA8
1.75821e-07	-0.243955	0.157	0.31	0.00165465	4	ADAM10
3.99265e-07	-0.244408	0.374	0.561	0.00375748	4	PERP
2.96633e-14	-0.244538	1	1	2.79162e-10	4	OAZ1
4.12641e-07	-0.247147	0.387	0.575	0.00388336	4	GTF3A
2.48462e-10	-0.247942	0.995	0.996	2.33827e-06	4	RTN4
3.80438e-19	-0.248167	1	1	3.5803e-15	4	S100A6
6.71654e-08	-0.249444	0.351	0.556	0.000632093	4	RBM6
7.49856e-11	-0.249747	0.984	0.967	7.05689e-07	4	WDR1
3.74774e-08	-0.25063	0.312	0.512	0.0003527	4	EMC3
4.63552e-08	-0.250707	0.38	0.579	0.000436249	4	SEPTIN10
7.99495e-07	-0.250836	0.241	0.423	0.00752405	4	TIMM17A
1.19732e-07	-0.250892	0.285	0.473	0.0011268	4	GALNT13
2.87398e-07	-0.251444	0.339	0.532	0.0027047	4	RALA
1.89977e-07	-0.251462	0.308	0.499	0.00178787	4	SUN2
9.75706e-08	-0.251825	0.44	0.633	0.000918237	4	DHPS
4.31116e-09	-0.252275	0.301	0.516	4.05723e-05	4	RILPL1
4.34483e-07	-0.252897	0.378	0.567	0.00408892	4	MARCH6
1.49019e-07	-0.253113	0.305	0.503	0.00140242	4	PTP4A3
2.18179e-07	-0.253113	0.317	0.505	0.00205328	4	ARRB2
1.15223e-07	-0.254532	0.367	0.561	0.00108436	4	DCTN3
7.12505e-09	-0.256081	0.376	0.589	6.70539e-05	4	UBE2G2
7.65621e-07	-0.256611	0.369	0.56	0.00720526	4	CYC1
5.40342e-07	-0.258524	0.399	0.585	0.00508515	4	NDUFS3
1.82854e-07	-0.258857	0.335	0.54	0.00172084	4	UBE2E2
7.32415e-07	-0.260507	0.178	0.331	0.00689275	4	RARA
8.07912e-08	-0.260694	0.296	0.492	0.000760326	4	KLHL7
3.07818e-08	-0.260958	0.383	0.59	0.000289687	4	CSTF3
4.25585e-07	-0.261063	0.408	0.599	0.00400518	4	XPOT
6.7088e-07	-0.261455	0.431	0.609	0.00631365	4	NMRAL1
8.34224e-08	-0.262122	0.276	0.474	0.000785088	4	SLC11A2
7.98108e-14	-0.262814	0.998	0.996	7.51099e-10	4	GSN
4.86431e-07	-0.263293	0.321	0.508	0.0045778	4	ANKRD37
9.9558e-10	-0.264243	0.301	0.524	9.3694e-06	4	BCL2L13
3.63679e-07	-0.264753	0.462	0.645	0.00342259	4	ACBD6
4.97294e-09	-0.265272	0.317	0.531	4.68003e-05	4	TMED4
2.37487e-07	-0.265426	0.31	0.502	0.00223499	4	ROCK1
6.41726e-08	-0.266828	0.241	0.435	0.000603928	4	DENR
1.64138e-08	-0.267438	0.31	0.515	0.00015447	4	SAFB2
4.2852e-07	-0.268151	0.364	0.555	0.0040328	4	RIT1
5.7699e-11	-0.268387	0.998	0.989	5.43005e-07	4	ATP1A1
9.47009e-08	-0.268504	0.335	0.536	0.00089123	4	RABEP1
2.84257e-07	-0.26873	0.358	0.553	0.00267514	4	TSEN34
1.00866e-06	-0.268796	0.191	0.347	0.00949254	4	RTL8A
4.57541e-07	-0.268947	0.444	0.623	0.00430592	4	TMEM165
3.32876e-08	-0.268963	0.492	0.669	0.00031327	4	RPA1
6.15501e-07	-0.27039	0.312	0.499	0.00579248	4	LAPTM4B
1.57081e-11	-0.270595	0.995	0.99	1.47829e-07	4	SLC25A3
9.00989e-08	-0.271057	0.148	0.299	0.000847921	4	SMYD2
7.80395e-08	-0.271184	0.367	0.56	0.000734429	4	DLD
7.84025e-08	-0.271812	0.399	0.597	0.000737846	4	TGFB1
1.32273e-07	-0.273154	0.353	0.55	0.00124482	4	BTBD1
1.19695e-08	-0.273774	0.326	0.539	0.000112645	4	SP3
4.17505e-07	-0.274641	0.305	0.495	0.00392914	4	RNASEH1
4.80349e-07	-0.276293	0.419	0.614	0.00452057	4	DVL3
7.32937e-07	-0.276394	0.155	0.298	0.00689767	4	CHAF1A
1.3508e-07	-0.276813	0.437	0.626	0.00127124	4	LONP1
2.16006e-08	-0.277306	0.31	0.518	0.000203283	4	LIG1
7.77466e-07	-0.277875	0.18	0.333	0.00731673	4	GTSF1
3.50337e-07	-0.279493	0.421	0.606	0.00329703	4	CLN6
9.41979e-07	-0.280451	0.212	0.376	0.00886496	4	USP6NL
1.09757e-07	-0.282156	0.178	0.344	0.00103292	4	ELF1
1.04867e-06	-0.283136	0.18	0.331	0.00986908	4	TRIB3
1.23813e-07	-0.283547	0.378	0.575	0.0011652	4	ARPC5
3.4009e-08	-0.28528	0.344	0.543	0.000320058	4	POLD2
1.29566e-07	-0.28597	0.383	0.575	0.00121935	4	OSTF1
4.60943e-08	-0.286811	0.232	0.425	0.000433793	4	PRPF38A
4.43686e-07	-0.287139	0.433	0.618	0.00417553	4	MPC2
1.06782e-07	-0.287232	0.453	0.647	0.00100492	4	YME1L1
7.88614e-09	-0.288552	0.989	0.968	7.42165e-05	4	MYH9
4.5564e-07	-0.288591	0.417	0.604	0.00428803	4	UBE2B
2.64053e-07	-0.288628	0.424	0.609	0.002485	4	CISD1
4.74142e-07	-0.288661	0.56	0.709	0.00446215	4	ZNF428
6.7389e-08	-0.289576	0.337	0.54	0.000634198	4	MED4
3.67168e-08	-0.290468	0.262	0.459	0.000345542	4	SS18L1
1.4302e-08	-0.291045	0.392	0.6	0.000134597	4	IPO5
5.11947e-07	-0.291829	0.403	0.59	0.00481793	4	TACC1
3.83244e-08	-0.291967	0.262	0.455	0.000360671	4	C2orf68
2.99987e-07	-0.292214	0.292	0.475	0.00282317	4	ATP9B
1.0335e-08	-0.293055	0.456	0.647	9.72625e-05	4	PDCD6IP
8.60258e-07	-0.293331	0.159	0.305	0.00809589	4	SNRPA
6.07988e-08	-0.293633	0.364	0.563	0.000572177	4	SMIM15
7.68982e-08	-0.293929	0.376	0.568	0.000723689	4	TMEM9B
3.62014e-07	-0.294539	0.353	0.545	0.00340692	4	CAV2
2.57452e-09	-0.294593	0.276	0.486	2.42288e-05	4	VPS26B
1.71933e-08	-0.294637	0.351	0.553	0.000161806	4	GGA2
6.66536e-09	-0.295487	0.344	0.558	6.27277e-05	4	LMAN1
1.92474e-07	-0.295752	0.171	0.329	0.00181137	4	AMOTL1
1.0843e-07	-0.295876	0.342	0.541	0.00102043	4	LSR
6.12475e-08	-0.295892	0.615	0.756	0.000576401	4	U2AF2
1.48428e-08	-0.296239	0.362	0.566	0.000139686	4	MTX2
1.82219e-08	-0.296275	0.205	0.397	0.000171487	4	CLPTM1L
6.89066e-07	-0.297123	0.139	0.277	0.0064848	4	MTHFS
2.53225e-10	-0.297328	0.287	0.508	2.3831e-06	4	ISCA1
2.1513e-07	-0.297392	0.33	0.517	0.00202459	4	AIF1
3.54522e-07	-0.298053	0.178	0.329	0.0033364	4	CHST11
3.59863e-09	-0.298615	0.205	0.405	3.38667e-05	4	RCN1
7.84934e-07	-0.298676	0.287	0.461	0.00738702	4	SLC2A3
2.78553e-07	-0.299121	0.405	0.599	0.00262146	4	NINJ1
4.07797e-07	-0.299141	0.38	0.564	0.00383778	4	CDYL
1.17352e-08	-0.299234	0.319	0.524	0.00011044	4	UBXN4
1.17807e-07	-0.29925	0.405	0.595	0.00110868	4	EI24
6.05376e-08	-0.29962	0.271	0.467	0.000569719	4	TM7SF3
1.7617e-07	-0.299717	0.467	0.645	0.00165794	4	NDUFA3
5.98956e-07	-0.299794	0.164	0.31	0.00563678	4	PIP4K2A
9.5134e-10	-0.300649	0.303	0.516	8.95306e-06	4	ENY2
1.80039e-11	-0.300997	0.993	0.979	1.69435e-07	4	CNN3
4.13493e-07	-0.301279	0.41	0.593	0.00389139	4	MSH2
1.82424e-08	-0.301294	0.401	0.61	0.000171679	4	RNF167
2.3334e-09	-0.302382	0.278	0.489	2.19597e-05	4	RANBP9
1.18214e-09	-0.302499	0.175	0.367	1.11251e-05	4	SCAF11
5.00929e-11	-0.302933	0.982	0.947	4.71425e-07	4	GYPC
3.26245e-08	-0.303666	0.26	0.456	0.000307029	4	AGBL5
2.01495e-07	-0.303731	0.474	0.654	0.00189627	4	ZNF451
5.60574e-07	-0.304141	0.433	0.601	0.00527556	4	ARAP1
6.0935e-08	-0.304926	0.312	0.51	0.000573459	4	NIT2
1.21367e-07	-0.305213	0.342	0.537	0.00114219	4	SELENOS
6.88447e-08	-0.305693	0.369	0.559	0.000647898	4	ARL2BP
1.18953e-08	-0.305746	0.364	0.571	0.000111947	4	ETHE1
7.77803e-09	-0.306035	0.364	0.571	7.3199e-05	4	PAFAH1B1
4.23043e-23	-0.306279	1	1	3.98125e-19	4	SDCBP
1.46028e-08	-0.306328	0.273	0.481	0.000137427	4	CKAP5
6.58327e-08	-0.307242	0.376	0.573	0.000619552	4	MED24
6.25068e-09	-0.307819	0.369	0.578	5.88251e-05	4	SRSF4
7.71085e-07	-0.308156	0.125	0.255	0.00725668	4	ACOT13
3.0161e-07	-0.308876	0.182	0.344	0.00283845	4	BCL2L2
2.15868e-09	-0.309098	0.358	0.573	2.03153e-05	4	VAMP3
6.15153e-07	-0.309401	0.139	0.274	0.0057892	4	MBTPS1
2.24512e-08	-0.309441	0.396	0.603	0.000211289	4	ANKLE2
6.79674e-09	-0.309636	0.326	0.531	6.39641e-05	4	COMMD9
1.38852e-09	-0.309653	0.282	0.5	1.30673e-05	4	SMG1
1.35885e-08	-0.309708	0.353	0.556	0.000127882	4	CCDC85B
2.85382e-08	-0.309793	0.367	0.567	0.000268573	4	BMP2K
2.05874e-08	-0.30985	0.39	0.589	0.000193748	4	DGCR8
3.32693e-09	-0.31008	0.419	0.631	3.13098e-05	4	RABAC1
4.23397e-09	-0.311072	0.31	0.521	3.98459e-05	4	CTDNEP1
4.31617e-08	-0.311337	0.396	0.597	0.000406195	4	ANP32A
2.07027e-09	-0.311446	0.296	0.512	1.94833e-05	4	LARP4B
2.92706e-09	-0.311557	0.376	0.588	2.75465e-05	4	EIF3D
1.02011e-08	-0.311871	0.364	0.573	9.60022e-05	4	FAM49B
4.67923e-08	-0.311941	0.371	0.564	0.000440363	4	ZPR1
2.64901e-08	-0.312428	0.267	0.462	0.000249298	4	MALT1
1.60059e-07	-0.312665	0.28	0.464	0.00150632	4	BHLHE40
2.32585e-07	-0.313052	0.228	0.406	0.00218886	4	HS3ST2
8.26133e-09	-0.313174	0.303	0.508	7.77474e-05	4	PDHB
1.6227e-08	-0.313718	0.33	0.532	0.000152712	4	DAD1
1.3053e-09	-0.313737	0.364	0.579	1.22841e-05	4	OGA
2.41512e-10	-0.314831	0.287	0.513	2.27287e-06	4	ABR
2.67016e-08	-0.31559	0.239	0.431	0.000251289	4	PCMTD2
1.34291e-07	-0.316101	0.351	0.54	0.00126381	4	COA3
7.43249e-10	-0.316158	0.467	0.668	6.99472e-06	4	KDELR1
8.37389e-09	-0.316166	0.282	0.487	7.88067e-05	4	PAN3
4.20363e-07	-0.317121	0.157	0.305	0.00395604	4	CNOT8
1.67836e-07	-0.317215	0.164	0.317	0.0015795	4	EFCAB14
1.36222e-07	-0.317313	0.982	0.954	0.00128199	4	CALR
4.83919e-07	-0.317364	0.171	0.321	0.00455416	4	ACAA1
2.57822e-07	-0.317956	0.128	0.266	0.00242637	4	IDUA
2.18414e-09	-0.318221	0.301	0.514	2.0555e-05	4	KIAA1211
1.9959e-08	-0.319284	0.346	0.557	0.000187834	4	SENP2
1.78772e-09	-0.319342	0.346	0.556	1.68242e-05	4	TMEM160
2.3263e-09	-0.320183	0.378	0.595	2.18928e-05	4	TLK1
7.70915e-09	-0.320201	0.155	0.326	7.25508e-05	4	TMEM30A
3.09928e-08	-0.320201	0.401	0.603	0.000291673	4	CDC5L
1.78147e-08	-0.320639	0.271	0.471	0.000167654	4	POLR3D
6.0536e-10	-0.320848	0.355	0.575	5.69704e-06	4	ANAPC13
5.0057e-07	-0.321576	0.148	0.29	0.00471087	4	USP15
4.41057e-07	-0.321576	0.18	0.335	0.00415079	4	ABRACL
5.05901e-07	-0.322179	0.483	0.653	0.00476104	4	RAB18
8.58333e-09	-0.322252	0.405	0.611	8.07777e-05	4	CHMP3
1.84755e-09	-0.323322	0.282	0.496	1.73873e-05	4	C9orf78
6.72325e-07	-0.324199	0.18	0.337	0.00632725	4	SMARCC2
1.66981e-08	-0.324239	0.269	0.471	0.000157146	4	UACA
3.92984e-08	-0.324844	0.558	0.715	0.000369838	4	RAB2A
7.46353e-09	-0.325572	0.403	0.617	7.02393e-05	4	ODC1
1.71375e-08	-0.325631	0.232	0.431	0.000161281	4	TRIM38
1.10841e-07	-0.325819	0.239	0.426	0.00104313	4	IGF2R
1.41568e-07	-0.325863	0.162	0.314	0.0013323	4	PSPC1
3.75269e-08	-0.325886	0.221	0.413	0.000353166	4	RPAIN
7.07896e-13	-0.326144	0.984	0.947	6.66201e-09	4	PTMS
5.07492e-07	-0.32664	0.419	0.596	0.00477601	4	NUSAP1
1.35268e-07	-0.326954	0.169	0.332	0.00127301	4	MAD2L1BP
6.38097e-09	-0.32703	0.335	0.545	6.00514e-05	4	NBR1
1.43174e-07	-0.327419	0.492	0.66	0.00134741	4	HIBADH
1.22239e-08	-0.328231	0.408	0.61	0.000115039	4	SNX1
2.50214e-07	-0.328492	0.462	0.643	0.00235476	4	PLEKHB2
7.02854e-09	-0.328866	0.335	0.542	6.61456e-05	4	HIST1H4I
1.41205e-08	-0.328968	0.984	0.935	0.000132888	4	BCAS3
1.44068e-07	-0.329143	0.191	0.358	0.00135583	4	SPTLC1
5.25475e-08	-0.329154	0.257	0.453	0.000494524	4	EIF4E2
8.8506e-07	-0.329264	0.756	0.799	0.0083293	4	SYNGR1
6.79623e-10	-0.329284	0.289	0.512	6.39593e-06	4	GLTP
4.43717e-09	-0.329362	0.333	0.543	4.17582e-05	4	GMFG
8.13955e-08	-0.330531	1	0.995	0.000766013	4	GLUL
1.47764e-09	-0.331057	0.216	0.428	1.39061e-05	4	CALCOCO1
1.36225e-08	-0.331194	0.399	0.598	0.000128202	4	HSD17B10
7.77345e-08	-0.332454	0.171	0.332	0.000731559	4	HEATR1
5.71214e-09	-0.332711	0.39	0.593	5.37569e-05	4	DENND6A
1.88525e-08	-0.332981	0.353	0.558	0.000177421	4	ORMDL1
7.91503e-07	-0.333494	0.185	0.335	0.00744884	4	TAF11
1.90769e-08	-0.333814	0.267	0.463	0.000179532	4	MRTFA
8.69335e-09	-0.334013	0.28	0.483	8.18131e-05	4	ANAPC7
8.80852e-07	-0.334013	0.159	0.301	0.0082897	4	ARFGAP2
4.45524e-07	-0.334176	0.134	0.27	0.00419283	4	ARMC8
1.90222e-07	-0.334489	0.38	0.562	0.00179018	4	SNX10
1.25688e-08	-0.334659	0.472	0.664	0.000118285	4	ARFGAP1
6.86926e-07	-0.334873	0.128	0.257	0.00646466	4	ARL14EP
3.67772e-08	-0.335781	0.294	0.492	0.00034611	4	XPO6
1.84635e-08	-0.336036	0.169	0.344	0.00017376	4	PHYKPL
1.44366e-07	-0.336266	0.456	0.634	0.00135863	4	MCM6
1.34259e-07	-0.336328	0.159	0.317	0.00126351	4	MAPKAP1
1.02216e-10	-0.336458	0.285	0.508	9.61951e-07	4	FAM193B
2.04556e-07	-0.33672	0.21	0.383	0.00192507	4	SMAD3
2.20862e-09	-0.337061	0.369	0.582	2.07853e-05	4	CD2AP
2.36681e-10	-0.338191	0.198	0.409	2.22741e-06	4	GLG1
3.12448e-10	-0.338319	0.319	0.538	2.94045e-06	4	GSR
5.97968e-09	-0.338467	0.369	0.582	5.62747e-05	4	JPT1
5.5075e-08	-0.338527	0.376	0.571	0.000518311	4	LSM12
3.65882e-09	-0.33865	0.273	0.481	3.44331e-05	4	SLBP
6.8237e-08	-0.338828	0.376	0.564	0.000642179	4	GLRX5
1.79543e-13	-0.339291	0.995	0.984	1.68968e-09	4	MYO5A
3.34057e-09	-0.339688	0.378	0.587	3.14381e-05	4	PUF60
2.76912e-09	-0.339946	0.392	0.606	2.60602e-05	4	VPS28
3.65519e-07	-0.340192	0.401	0.583	0.0034399	4	ANKRD39
2.61287e-09	-0.340414	0.305	0.519	2.45897e-05	4	YIF1B
1.91637e-08	-0.340662	0.294	0.496	0.00018035	4	PRNP
1.9537e-08	-0.34077	0.503	0.681	0.000183863	4	CLASP2
1.54359e-08	-0.341038	0.38	0.58	0.000145267	4	POM121
1.54772e-08	-0.341205	0.392	0.591	0.000145656	4	UBP1
3.37543e-08	-0.341433	0.355	0.553	0.000317662	4	PRKACA
4.43195e-07	-0.341476	0.173	0.325	0.00417091	4	PPP2R3C
5.21079e-08	-0.341811	0.524	0.68	0.000490387	4	EBNA1BP2
1.05594e-06	-0.341959	0.303	0.476	0.00993744	4	TGFBR2
8.57813e-07	-0.342832	0.189	0.341	0.00807288	4	KTN1
5.99445e-08	-0.3429	0.408	0.597	0.000564138	4	ARHGEF1
2.45485e-07	-0.343184	0.164	0.314	0.00231026	4	DMAC2
8.98321e-09	-0.343219	0.394	0.597	8.4541e-05	4	HMGN4
4.42033e-07	-0.343772	0.155	0.295	0.00415997	4	NRSN2
1.01164e-08	-0.343923	0.392	0.588	9.52052e-05	4	DBN1
1.70241e-09	-0.344614	0.248	0.454	1.60214e-05	4	RRAGD
5.64231e-10	-0.344826	0.314	0.527	5.30998e-06	4	CPQ
2.09163e-09	-0.344826	0.323	0.54	1.96843e-05	4	STAG2
6.44127e-08	-0.345208	0.198	0.377	0.000606188	4	HSF1
6.83943e-08	-0.345447	0.374	0.562	0.000643659	4	DR1
1.17212e-10	-0.345579	0.344	0.571	1.10308e-06	4	CCAR2
1.07216e-09	-0.346098	0.237	0.446	1.00901e-05	4	DCK
7.93474e-09	-0.346267	0.282	0.488	7.46738e-05	4	PHF19
3.57616e-08	-0.34658	0.394	0.584	0.000336552	4	GCN1
2.72985e-07	-0.346722	0.155	0.303	0.00256906	4	DEDD
7.41938e-10	-0.346733	0.344	0.559	6.98238e-06	4	PTAR1
1.55907e-08	-0.347006	0.301	0.497	0.000146724	4	STT3B
9.89759e-07	-0.347571	0.128	0.258	0.00931463	4	ATG14
1.36531e-07	-0.348017	0.517	0.676	0.00128489	4	TXNDC5
3.02685e-08	-0.348276	0.82	0.84	0.000284856	4	PPARD
2.68912e-08	-0.348332	0.164	0.333	0.000253073	4	TPR
5.37267e-07	-0.348484	0.153	0.294	0.00505622	4	SLC30A1
7.01418e-09	-0.348644	0.333	0.545	6.60104e-05	4	ZNF207
1.83115e-08	-0.348852	0.323	0.525	0.000172329	4	NOP58
4.62225e-08	-0.348892	0.159	0.321	0.000435	4	KPNA1
1.71392e-07	-0.349232	0.178	0.339	0.00161297	4	RGL2
6.71544e-07	-0.349283	0.535	0.675	0.0063199	4	NEDD4L
1.6286e-08	-0.350145	0.162	0.331	0.000153267	4	HMG20A
1.41867e-08	-0.350527	0.394	0.598	0.000133511	4	TNKS
1.31703e-07	-0.35092	0.171	0.33	0.00123946	4	SMIM12
2.59388e-07	-0.350982	0.13	0.268	0.0024411	4	CSNK1E
1.41919e-07	-0.35114	0.157	0.307	0.0013356	4	SETD3
2.38243e-07	-0.35114	0.159	0.312	0.00224211	4	ABHD14B
3.63345e-07	-0.351247	0.189	0.346	0.00341944	4	PPP1R12C
2.75316e-10	-0.351296	0.399	0.613	2.591e-06	4	PTDSS1
5.40657e-07	-0.351388	0.157	0.3	0.00508813	4	C17orf58
1.20107e-08	-0.351835	0.453	0.643	0.000113032	4	DNMT1
5.46389e-10	-0.352076	0.478	0.67	5.14206e-06	4	GNG12
1.91539e-09	-0.352531	0.399	0.616	1.80257e-05	4	CLPP
6.22091e-10	-0.35256	0.232	0.442	5.8545e-06	4	TSPAN14
5.29672e-08	-0.352691	0.301	0.49	0.000498474	4	PHLDA2
2.26728e-10	-0.352827	0.342	0.566	2.13374e-06	4	PSMD1
6.0619e-10	-0.353159	0.364	0.577	5.70485e-06	4	GAB2
2.85449e-08	-0.353385	0.41	0.604	0.000268636	4	SEMA3C
2.12493e-09	-0.353468	0.385	0.597	1.99977e-05	4	SLC6A17
5.39159e-07	-0.353598	0.583	0.709	0.00507403	4	HIST1H2BG
8.11126e-09	-0.353696	0.506	0.679	7.63351e-05	4	DUSP3
3.84672e-07	-0.353903	0.171	0.322	0.00362014	4	RHBDD2
5.15905e-10	-0.353981	0.38	0.596	4.85518e-06	4	AGO1
3.69679e-09	-0.354027	0.408	0.608	3.47905e-05	4	DNAJB11
1.06179e-06	-0.354095	0.114	0.236	0.00999247	4	C8orf76
1.9648e-11	-0.354339	0.298	0.533	1.84907e-07	4	CCDC91
1.24872e-12	-0.354374	1	0.999	1.17518e-08	4	HSP90AA1
7.45706e-12	-0.354378	0.982	0.941	7.01784e-08	4	UGCG
7.55504e-09	-0.354414	0.308	0.516	7.11005e-05	4	ACIN1
1.90388e-16	-0.3547	1	0.993	1.79174e-12	4	SERPINE2
5.66817e-07	-0.354878	0.123	0.254	0.00533432	4	CEP57
2.75358e-11	-0.356076	0.989	0.952	2.5914e-07	4	HIST1H4E
3.64881e-09	-0.356122	0.276	0.485	3.4339e-05	4	SERPINB1
2.22426e-10	-0.356186	0.321	0.541	2.09325e-06	4	TFPT
9.77409e-07	-0.357038	0.185	0.334	0.00919839	4	MBD2
1.64043e-10	-0.357336	0.253	0.471	1.54381e-06	4	PRXL2B
6.69473e-08	-0.357576	0.169	0.327	0.000630041	4	SWAP70
6.90967e-07	-0.357686	0.146	0.284	0.00650269	4	VEZF1
1.00405e-07	-0.357918	0.198	0.364	0.00094491	4	UCK2
3.54855e-08	-0.358025	0.15	0.304	0.000333954	4	SPSB1
2.08256e-08	-0.358818	0.39	0.582	0.00019599	4	QDPR
6.72546e-09	-0.358875	0.207	0.401	6.32933e-05	4	RNF216
1.31822e-08	-0.359132	0.337	0.538	0.000124057	4	HCFC1R1
9.03005e-07	-0.359432	0.533	0.673	0.00849818	4	CDK2
5.30134e-09	-0.359436	0.364	0.566	4.98909e-05	4	TRIB1
7.21069e-07	-0.359594	0.132	0.265	0.00678598	4	SGSH
4.36775e-08	-0.359912	0.41	0.6	0.000411049	4	SELENON
5.00826e-09	-0.360116	0.333	0.538	4.71327e-05	4	DDX49
7.39282e-10	-0.360165	0.467	0.667	6.95738e-06	4	ELOVL5
5.71471e-07	-0.360547	0.139	0.275	0.00537812	4	LST1
6.72146e-07	-0.360676	0.194	0.348	0.00632557	4	ARHGDIB
3.60628e-08	-0.360769	0.194	0.37	0.000339387	4	ZNF740
7.08113e-10	-0.361043	0.36	0.572	6.66405e-06	4	DDX1
3.28757e-07	-0.361953	0.182	0.341	0.00309393	4	KAT5
1.7274e-07	-0.362218	0.146	0.289	0.00162566	4	HEBP1
7.47381e-09	-0.362218	0.346	0.553	7.0336e-05	4	CCDC12
1.12875e-07	-0.362778	0.171	0.327	0.00106227	4	STX8
8.21076e-07	-0.363203	0.146	0.281	0.00772715	4	SBF2
1.35095e-07	-0.36382	0.148	0.293	0.00127138	4	NTAN1
3.96416e-10	-0.364145	0.371	0.59	3.73067e-06	4	PSMC3
3.21583e-09	-0.364178	0.378	0.582	3.02642e-05	4	UPP1
2.74617e-11	-0.365486	0.312	0.546	2.58442e-07	4	NDUFA10
5.73432e-08	-0.365666	0.369	0.559	0.000539657	4	LARP4
2.77079e-09	-0.365857	0.364	0.564	2.60759e-05	4	PAICS
2.73283e-07	-0.366664	0.164	0.316	0.00257186	4	BSDC1
1.12286e-09	-0.366912	0.203	0.401	1.05672e-05	4	ASPSCR1
2.74424e-08	-0.367059	0.367	0.56	0.00025826	4	IRAK1
8.43431e-08	-0.36728	0.478	0.645	0.000793753	4	TCEAL9
6.40926e-10	-0.367289	0.371	0.593	6.03176e-06	4	CDH3
1.79996e-09	-0.367727	0.453	0.651	1.69394e-05	4	ILK
4.72228e-09	-0.367796	0.38	0.584	4.44414e-05	4	PFKL
1.85668e-08	-0.367832	0.385	0.575	0.000174733	4	SCARB2
3.63416e-07	-0.367887	0.153	0.295	0.0034201	4	TAF1
2.77167e-10	-0.368095	0.349	0.566	2.60842e-06	4	ANKRD11
2.95275e-09	-0.368254	0.342	0.551	2.77883e-05	4	PLAAT3
3.61641e-08	-0.369111	0.162	0.325	0.00034034	4	CALCOCO2
3.27439e-07	-0.369153	0.116	0.245	0.00308152	4	DNASE1L1
9.89611e-09	-0.369831	0.257	0.454	9.31323e-05	4	NECAP2
3.26691e-08	-0.369831	0.169	0.335	0.000307449	4	DENND10
3.29084e-11	-0.369985	0.31	0.54	3.09701e-07	4	TBRG1
3.61049e-09	-0.370424	0.501	0.678	3.39783e-05	4	NDUFAB1
2.23733e-10	-0.370486	0.282	0.508	2.10555e-06	4	VKORC1
2.65175e-10	-0.370875	0.387	0.609	2.49556e-06	4	OAZ2
6.48307e-08	-0.370892	0.171	0.335	0.000610122	4	PTEN
3.42054e-12	-0.371037	0.378	0.613	3.21907e-08	4	DDX21
2.86348e-09	-0.371291	0.367	0.574	2.69482e-05	4	PPFIA1
1.22512e-07	-0.371528	0.544	0.692	0.00115296	4	PRRC2A
4.50275e-10	-0.371598	0.321	0.538	4.23754e-06	4	GOLGB1
1.21435e-07	-0.372202	0.141	0.286	0.00114283	4	RAB17
5.40655e-09	-0.37238	0.38	0.578	5.0881e-05	4	VEGFB
1.05391e-08	-0.372486	0.205	0.395	9.91837e-05	4	CCPG1
1.87792e-07	-0.372635	0.132	0.268	0.00176731	4	TIGAR
4.30715e-11	-0.373374	0.38	0.604	4.05346e-07	4	SYVN1
1.11422e-14	-0.373957	0.993	0.964	1.04859e-10	4	HSPD1
1.61125e-08	-0.374139	0.175	0.347	0.000151635	4	AP3B1
1.04752e-08	-0.375803	0.364	0.558	9.85819e-05	4	MBNL2
1.33842e-10	-0.375859	0.276	0.503	1.25959e-06	4	TRIM26
8.43633e-11	-0.37623	0.326	0.553	7.93943e-07	4	SSRP1
2.45428e-10	-0.377456	0.376	0.6	2.30972e-06	4	NANS
6.45287e-08	-0.377815	0.13	0.277	0.000607279	4	POP5
2.05176e-07	-0.377883	0.61	0.73	0.00193092	4	ADGRG1
5.01917e-09	-0.377999	0.221	0.42	4.72354e-05	4	RAP1A
2.39573e-09	-0.378043	0.369	0.569	2.25462e-05	4	TPGS2
3.90815e-09	-0.378338	0.333	0.535	3.67796e-05	4	SEMA4C
1.51079e-12	-0.378547	0.321	0.562	1.4218e-08	4	NELFCD
5.44383e-09	-0.378652	0.207	0.4	5.12319e-05	4	PTPRG
5.44415e-08	-0.378676	0.385	0.574	0.000512349	4	ECHS1
2.4795e-07	-0.378791	0.134	0.271	0.00233345	4	SREBF1
7.21055e-09	-0.379292	0.144	0.308	6.78585e-05	4	MTLN
1.11989e-10	-0.37972	0.449	0.658	1.05392e-06	4	KLHDC3
2.65663e-09	-0.380415	0.401	0.614	2.50015e-05	4	TBC1D14
6.44242e-09	-0.380571	0.317	0.522	6.06296e-05	4	MTCH1
6.61033e-08	-0.380799	0.175	0.333	0.000622098	4	ELOF1
8.3858e-10	-0.380862	0.314	0.532	7.89188e-06	4	MAP2K3
3.21035e-10	-0.380955	0.301	0.512	3.02126e-06	4	MCCC2
6.19035e-08	-0.381104	0.18	0.346	0.000582574	4	RRP1
5.06168e-10	-0.381104	0.412	0.617	4.76354e-06	4	CD276
1.10848e-08	-0.381322	0.503	0.669	0.000104319	4	SEC11C
2.06041e-09	-0.381441	0.339	0.552	1.93905e-05	4	GTF2F1
6.53843e-08	-0.38148	0.175	0.334	0.000615331	4	FMC1
3.14614e-10	-0.381682	0.362	0.577	2.96083e-06	4	LPXN
9.21105e-09	-0.381914	0.38	0.576	8.66852e-05	4	ZBTB7A
8.53286e-07	-0.382266	0.164	0.307	0.00803027	4	LMF2
5.77672e-07	-0.382892	0.125	0.256	0.00543647	4	GOLGA5
5.728e-09	-0.383092	0.257	0.451	5.39062e-05	4	GADD45A
4.79295e-11	-0.383404	0.33	0.561	4.51065e-07	4	UBE2D2
2.11993e-10	-0.384586	0.385	0.608	1.99507e-06	4	GLS
2.50912e-09	-0.385235	0.387	0.593	2.36133e-05	4	NDUFS1
5.95091e-11	-0.385509	0.276	0.5	5.6004e-07	4	CYB5R1
3.0547e-07	-0.386065	0.153	0.294	0.00287478	4	SPRY2
1.00388e-06	-0.386815	0.13	0.256	0.0094475	4	CDK12
1.45119e-07	-0.387264	0.162	0.316	0.00136571	4	PLSCR3
2.69068e-12	-0.387523	0.36	0.589	2.5322e-08	4	GTPBP2
1.14147e-08	-0.387905	0.194	0.379	0.000107424	4	IWS1
3.84159e-10	-0.388396	0.271	0.488	3.61532e-06	4	POLG
9.22429e-08	-0.38869	0.453	0.63	0.000868098	4	AHSA1
1.39491e-07	-0.38869	0.185	0.344	0.00131275	4	TEKT5
1.78682e-10	-0.389069	0.189	0.395	1.68158e-06	4	LCORL
2.04758e-08	-0.389576	0.166	0.33	0.000192698	4	CZIB
5.82919e-09	-0.39006	0.487	0.664	5.48585e-05	4	PSMD2
1.22246e-08	-0.390085	0.159	0.327	0.000115046	4	MPLKIP
7.78761e-07	-0.390124	0.408	0.576	0.00732892	4	LRP1
1.29612e-07	-0.39095	0.166	0.326	0.00121978	4	HADH
1.40755e-07	-0.391668	0.155	0.306	0.00132464	4	STK39
2.7883e-09	-0.392366	0.228	0.428	2.62407e-05	4	GATD1
2.92948e-07	-0.39246	0.166	0.315	0.00275693	4	HSD17B11
2.86635e-09	-0.392758	0.178	0.358	2.69752e-05	4	STK25
4.46844e-07	-0.392936	0.374	0.541	0.00420525	4	ENG
9.43752e-11	-0.393175	0.378	0.596	8.88165e-07	4	TBC1D9B
3.15346e-12	-0.393245	0.991	0.956	2.96772e-08	4	HIST1H1E
1.92561e-08	-0.393269	0.164	0.33	0.000181219	4	LSM6
[truncated: 1,501 more rows]

## Sheet: UKF5_DEG
p_val	avg_log2FC	pct.1	pct.2	p_val_adj	ayes_space	gene
5.16708e-08	0.946494	0.228	0.113	0.000325939	1	BNIP1
4.07783e-08	0.841429	0.235	0.114	0.00025723	1	HOXB5
8.47182e-10	0.763468	0.534	0.364	5.34402e-06	1	YWHAE
1.54218e-06	0.748662	0.21	0.108	0.00972809	1	STARD8
1.33631e-12	0.626762	0.687	0.467	8.42944e-09	1	SRSF6
8.71882e-13	0.622527	0.726	0.5	5.49983e-09	1	ADAT1
1.36001e-16	0.620082	0.833	0.621	8.57897e-13	1	SMG5
2.19994e-07	0.607522	0.463	0.3	0.00138772	1	PGAP2
1.19072e-08	0.598804	0.619	0.439	7.51105e-05	1	ABCD1
4.51312e-09	0.583714	0.477	0.291	2.84688e-05	1	SF3B4
3.44663e-16	0.571404	0.918	0.756	2.17413e-12	1	UQCC2
9.0414e-21	0.566257	0.964	0.836	5.70332e-17	1	SLC7A5
2.04183e-07	0.560287	0.427	0.27	0.00128799	1	LRFN3
2.30485e-08	0.515385	0.676	0.489	0.00014539	1	CHTF18
9.91985e-10	0.513401	0.772	0.619	6.25744e-06	1	WWTR1
1.27349e-07	0.4975	0.598	0.429	0.000803315	1	BOLA1
9.50488e-08	0.495349	0.541	0.371	0.000599568	1	IRS1
1.07037e-07	0.491839	0.673	0.502	0.00067519	1	GARS
4.94076e-07	0.490689	0.512	0.354	0.00311663	1	HOXC4
2.69269e-07	0.481167	0.569	0.397	0.00169855	1	RTL8C
4.72091e-09	0.478597	0.754	0.611	2.97795e-05	1	PIGQ
3.00112e-07	0.47642	0.527	0.351	0.00189311	1	RPP25
3.50296e-08	0.475442	0.754	0.593	0.000220967	1	C1orf216
4.80513e-08	0.470268	0.651	0.46	0.000303107	1	HGH1
5.52075e-10	0.468753	0.751	0.534	3.48249e-06	1	ACY1
1.72592e-08	0.465793	0.612	0.429	0.000108871	1	HEMK1
1.50289e-12	0.465112	0.936	0.767	9.48023e-09	1	PEPD
4.96866e-07	0.463594	0.594	0.433	0.00313423	1	PCCB
9.86658e-07	0.459192	0.776	0.637	0.00622384	1	TBL3
4.01763e-09	0.458215	0.744	0.55	2.53432e-05	1	PHF12
7.85921e-16	0.451611	0.968	0.833	4.95759e-12	1	AARS
6.68156e-10	0.447565	0.779	0.599	4.21473e-06	1	BBS1
4.51421e-07	0.446187	0.651	0.485	0.00284756	1	ZFYVE9
1.30738e-06	0.444801	0.594	0.414	0.00824696	1	PDXP
1.01419e-07	0.444714	0.722	0.53	0.000639751	1	GINS1
6.0759e-10	0.440984	0.915	0.744	3.83267e-06	1	FDPS
1.06842e-11	0.436655	0.858	0.652	6.7396e-08	1	SCLT1
6.50526e-09	0.430542	0.762	0.586	4.10352e-05	1	CLIP2
3.42156e-07	0.429377	0.633	0.468	0.00215832	1	BCL9
4.20977e-07	0.425644	0.669	0.478	0.00265552	1	CYTL1
1.03592e-12	0.421803	0.947	0.817	6.53459e-09	1	LAMTOR2
1.17097e-07	0.420013	0.698	0.496	0.000738649	1	RAD54L
4.17621e-11	0.41736	0.932	0.813	2.63436e-07	1	RBM8A
7.33461e-17	0.417141	0.996	0.911	4.62667e-13	1	SDHB
3.83426e-09	0.41673	0.847	0.672	2.41865e-05	1	LMO7
1.68566e-20	0.409264	0.993	0.931	1.06331e-16	1	MAZ
4.72968e-08	0.407515	0.783	0.587	0.000298348	1	NOL9
6.76041e-14	0.399973	0.964	0.816	4.26446e-10	1	TMEM199
8.56171e-14	0.397735	0.982	0.916	5.40073e-10	1	PPM1A
7.47087e-07	0.392644	0.779	0.599	0.00471263	1	DLAT
6.77853e-16	0.388347	0.993	0.899	4.2759e-12	1	LMNB2
3.9516e-08	0.387351	0.861	0.717	0.000249267	1	MAGED2
6.65914e-14	0.381167	0.972	0.862	4.20058e-10	1	ASAP2
8.1656e-09	0.378963	0.854	0.692	5.15086e-05	1	MSL1
3.02176e-16	0.375792	0.989	0.956	1.90613e-12	1	NES
1.44939e-08	0.372391	0.9	0.762	9.14275e-05	1	BLOC1S1
1.02485e-15	0.372109	0.989	0.925	6.46474e-12	1	SCRIB
9.83501e-07	0.370798	0.555	0.37	0.00620392	1	TCF7
1.22851e-10	0.367662	0.95	0.794	7.74945e-07	1	BRMS1
6.84888e-09	0.366962	0.879	0.765	4.32027e-05	1	SNRPB
2.07508e-07	0.364402	0.587	0.382	0.00130896	1	MICALL2
6.61875e-11	0.36168	0.9	0.72	4.17511e-07	1	C1orf35
2.69512e-07	0.359927	0.886	0.742	0.00170008	1	SAC3D1
3.91478e-09	0.356981	0.94	0.789	2.46944e-05	1	PSMD3
8.16294e-07	0.356907	0.858	0.752	0.00514918	1	AP2A1
1.79581e-11	0.354991	0.936	0.821	1.1328e-07	1	NELFB
2.04027e-10	0.353601	0.943	0.846	1.28701e-06	1	SRGAP2
2.64247e-08	0.353211	0.932	0.788	0.000166687	1	RO60
5.60835e-08	0.351992	0.907	0.719	0.000353775	1	UBQLN4
7.05277e-14	0.351753	0.993	0.941	4.44888e-10	1	NCS1
2.06758e-12	0.350672	0.993	0.923	1.30423e-08	1	NDUFA1
1.0216e-16	0.349566	1	0.952	6.44426e-13	1	ABR
1.89113e-21	0.348627	0.996	0.961	1.19292e-17	1	TNFRSF14
2.95357e-11	0.348001	0.932	0.809	1.86311e-07	1	BCKDHB
8.45282e-14	0.343825	0.993	0.931	5.33204e-10	1	APRT
1.19976e-07	0.342283	0.854	0.688	0.000756807	1	ZDHHC12
1.07321e-09	0.342185	0.964	0.815	6.7698e-06	1	KIF3A
1.62102e-09	0.34185	0.925	0.8	1.02254e-05	1	ATXN2L
1.8705e-09	0.34169	0.922	0.772	1.17991e-05	1	MCM3AP
4.5169e-11	0.341641	0.886	0.739	2.84926e-07	1	NUDC
4.21042e-08	0.341404	0.932	0.818	0.000265593	1	C6orf89
8.87803e-10	0.340392	0.929	0.799	5.60026e-06	1	TMEM208
1.51807e-08	0.335102	0.911	0.754	9.576e-05	1	AMMECR1L
1.04365e-20	0.334701	0.996	0.97	6.58335e-17	1	CUTA
5.7816e-07	0.33324	0.851	0.681	0.00364703	1	DPH2
2.27698e-07	0.328726	0.915	0.778	0.00143632	1	TARS2
6.52546e-25	0.327999	1	0.974	4.11626e-21	1	HCFC1R1
1.67877e-07	0.326089	0.811	0.658	0.00105897	1	DHX40
1.63376e-12	0.325981	0.947	0.829	1.03058e-08	1	H2AFX
5.8252e-10	0.324305	0.915	0.789	3.67454e-06	1	NT5C
3.72363e-10	0.322107	0.975	0.849	2.34887e-06	1	HGSNAT
4.91341e-07	0.321808	0.804	0.678	0.00309938	1	TSPYL4
4.07378e-08	0.320699	0.872	0.733	0.000256974	1	SCFD2
9.31646e-07	0.319947	0.801	0.67	0.00587682	1	ZDHHC7
1.55296e-06	0.318434	0.808	0.638	0.00979606	1	NCDN
5.8285e-08	0.314973	0.854	0.717	0.000367662	1	SMUG1
1.9725e-07	0.314521	0.808	0.679	0.00124425	1	CFDP1
9.91445e-07	0.311223	0.783	0.59	0.00625403	1	FHL3
7.75791e-10	0.310465	0.968	0.916	4.89369e-06	1	H3F3B
6.48547e-08	0.309811	0.843	0.711	0.000409103	1	MICOS13
1.54948e-09	0.308613	0.94	0.827	9.77413e-06	1	GRWD1
3.57386e-08	0.307447	0.964	0.894	0.000225439	1	LIG1
5.27285e-12	0.305414	0.993	0.93	3.32611e-08	1	PHF19
4.66486e-13	0.304865	0.989	0.961	2.9426e-09	1	PHB2
1.5849e-07	0.304009	0.907	0.741	0.000999753	1	INTS7
1.14191e-09	0.303706	0.986	0.894	7.20317e-06	1	ITPKB
6.38362e-07	0.302413	0.918	0.783	0.00402678	1	LIX1L
8.57315e-09	0.302335	0.975	0.883	5.40794e-05	1	QSOX2
2.33064e-07	0.301485	0.872	0.762	0.00147017	1	LIG3
3.62418e-07	0.301058	0.929	0.811	0.00228613	1	ANAPC2
4.44524e-10	0.300198	0.996	0.939	2.80406e-06	1	HIST1H4A
8.18872e-07	0.29533	0.904	0.806	0.00516544	1	DNAAF5
1.44376e-09	0.294473	0.972	0.867	9.10724e-06	1	MRTO4
1.17387e-07	0.293579	0.943	0.81	0.000740478	1	CAPN10
9.2051e-07	0.292561	0.89	0.758	0.00580658	1	TYSND1
7.18135e-29	0.288471	1	0.995	4.52999e-25	1	ENO1
8.73468e-07	0.288164	0.886	0.759	0.00550983	1	TM2D1
1.42198e-08	0.284898	0.982	0.909	8.96984e-05	1	ETS1
1.19098e-07	0.282635	0.954	0.842	0.000751273	1	TIMM13
6.47237e-09	0.28186	0.954	0.85	4.08277e-05	1	IFI27L2
3.6349e-07	0.281247	0.961	0.819	0.00229289	1	TMEM184B
4.44233e-07	0.276684	0.922	0.807	0.00280222	1	PSRC1
2.29344e-07	0.276138	0.826	0.704	0.0014467	1	MFSD3
5.66917e-08	0.275976	0.989	0.894	0.000357611	1	HIST1H2BO
2.00646e-12	0.273432	1	0.96	1.26568e-08	1	PRDX6
8.44072e-08	0.272969	0.986	0.907	0.000532441	1	PFKP
1.23833e-07	0.269875	0.943	0.817	0.000781141	1	NOM1
7.16809e-15	0.268501	1	0.965	4.52163e-11	1	TUFM
2.71329e-10	0.267384	0.982	0.904	1.71154e-06	1	INPPL1
5.31537e-11	0.26655	0.989	0.919	3.35293e-07	1	CIAO2B
1.16034e-06	0.265824	0.982	0.852	0.00731944	1	PAM16
1.10142e-08	0.264682	0.925	0.827	6.94775e-05	1	ARMCX3
4.12204e-08	0.263906	0.893	0.767	0.000260019	1	EEF1D
6.03807e-09	0.261351	0.993	0.931	3.80882e-05	1	CIAO1
8.15203e-11	0.25817	0.993	0.947	5.1423e-07	1	PHACTR1
3.65821e-07	0.257613	0.936	0.827	0.0023076	1	TUSC1
2.01835e-11	0.257542	0.996	0.971	1.27318e-07	1	FXYD3
6.0634e-09	0.257324	0.986	0.921	3.82479e-05	1	OTUB1
4.17222e-07	0.256344	0.957	0.858	0.00263183	1	WDR41
3.33236e-07	0.254647	0.954	0.836	0.00210205	1	FAM199X
1.22637e-15	0.254563	0.996	0.968	7.73597e-12	1	NEDD8
4.85945e-11	0.25282	1	0.984	3.06534e-07	1	HIST1H1E
1.36834e-08	0.252529	0.996	0.936	8.63148e-05	1	CAV2
1.79565e-09	0.250991	0.993	0.944	1.1327e-05	1	CTDNEP1
1.25577e-06	0.250909	0.854	0.717	0.00792141	1	ITPRIPL2
1.31948e-07	0.249921	0.986	0.917	0.000832331	1	NDUFA8
1.15437e-10	0.248216	0.996	0.962	7.28177e-07	1	P4HB
1.17456e-11	0.242768	0.996	0.968	7.40913e-08	1	TSPAN10
1.39149e-07	0.242128	0.936	0.822	0.000877754	1	FRMD8
2.00693e-14	0.242082	0.996	0.967	1.26597e-10	1	PSMB5
1.883e-09	0.24161	0.996	0.955	1.1878e-05	1	CCT5
7.41553e-07	0.241418	0.936	0.854	0.00467772	1	ZC3H18
3.4161e-07	0.241413	0.89	0.78	0.00215488	1	APIP
2.02349e-08	0.240502	0.961	0.883	0.000127642	1	PLIN3
2.3679e-13	0.240119	1	0.97	1.49367e-09	1	MARCKSL1
2.85527e-14	0.238926	1	0.976	1.8011e-10	1	XRCC6
5.23183e-07	0.23884	0.989	0.93	0.00330024	1	ILVBL
1.3118e-07	0.236577	0.982	0.911	0.000827482	1	RUNX3
1.37791e-06	0.235307	0.932	0.825	0.00869183	1	UBE2E1
1.14617e-14	0.229384	1	0.984	7.23002e-11	1	OSTM1
4.21914e-15	0.228858	1	0.984	2.66143e-11	1	FAM178B
9.60203e-10	0.228532	0.996	0.953	6.05696e-06	1	RAB5C
3.73288e-07	0.227744	0.943	0.858	0.0023547	1	TOM1
3.72481e-07	0.224779	0.989	0.917	0.00234961	1	EIF2B1
2.46336e-18	0.224379	1	0.984	1.55389e-14	1	GPI
1.11415e-07	0.223815	0.993	0.951	0.000702804	1	AGRN
4.83741e-16	0.223792	1	0.985	3.05144e-12	1	SLC24A5
1.7786e-09	0.223241	0.996	0.963	1.12194e-05	1	EHD4
8.59098e-12	0.223035	0.996	0.972	5.41919e-08	1	AMDHD2
1.01599e-08	0.222381	0.996	0.952	6.40885e-05	1	BUD23
5.30418e-10	0.216715	0.996	0.963	3.34588e-06	1	RNF145
1.89702e-24	0.215721	1	0.992	1.19664e-20	1	NDUFA13
3.96043e-18	0.209883	1	0.983	2.49824e-14	1	FLOT1
1.56094e-09	0.206584	0.996	0.968	9.8464e-06	1	APH1A
1.84343e-08	0.204972	1	0.969	0.000116283	1	GRSF1
5.15671e-08	0.204085	0.996	0.932	0.000325285	1	PPIL2
1.1159e-07	0.202155	0.996	0.966	0.000703911	1	WDFY1
1.13296e-06	0.20196	0.986	0.941	0.0071467	1	NDE1
1.50943e-12	0.200639	0.996	0.965	9.52145e-09	1	HMGA1
5.76454e-08	0.199533	0.996	0.957	0.000363627	1	PPM1F
1.08624e-06	0.194522	0.904	0.75	0.00685203	1	POLG2
1.83513e-09	0.193248	1	0.979	1.1576e-05	1	ANP32E
6.26521e-13	0.192332	1	0.984	3.9521e-09	1	GIPC1
1.23201e-10	0.186995	1	0.979	7.7715e-07	1	DNPH1
1.45886e-14	0.185323	1	0.997	9.20248e-11	1	IGFBP7
5.90936e-07	0.183488	0.996	0.952	0.00372762	1	TPP1
1.23328e-06	0.178637	1	0.967	0.00777956	1	SHMT2
6.79285e-08	0.177445	0.996	0.941	0.000428493	1	CREBZF
1.44049e-13	0.175864	1	0.994	9.08661e-10	1	SERF2
9.98373e-10	0.175839	1	0.985	6.29774e-06	1	PA2G4
2.31617e-09	0.174612	1	0.976	1.46104e-05	1	SAP25
6.91289e-11	0.169412	1	0.983	4.36065e-07	1	SLC3A2
1.3124e-09	0.167911	1	0.981	8.27862e-06	1	NUTF2
1.03302e-08	0.164069	1	0.977	6.51632e-05	1	HMG20B
1.92634e-08	0.162746	0.996	0.982	0.000121514	1	HDGF
7.06844e-14	0.157527	1	0.995	4.45877e-10	1	BEX3
5.80345e-08	0.155286	1	0.977	0.000366082	1	PRRC2A
2.19492e-08	0.153628	0.996	0.94	0.000138456	1	ETV3
1.18051e-07	0.153346	0.996	0.979	0.000744666	1	RNF11
4.22444e-08	0.152246	0.996	0.986	0.000266478	1	ZC3H13
4.55847e-18	0.147606	1	1	2.87548e-14	1	FLNA
1.07271e-06	0.146692	1	0.977	0.00676668	1	RCC2
1.31264e-06	0.144418	0.993	0.96	0.0082801	1	AKR1A1
1.04198e-06	0.143634	0.996	0.977	0.00657281	1	NCK2
1.50568e-06	0.138643	1	0.997	0.00949783	1	NSG1
6.59877e-08	0.138583	0.996	0.986	0.00041625	1	CCT3
5.47576e-08	0.132545	1	0.993	0.000345411	1	SNCA
1.34079e-09	0.130887	0.996	0.974	8.45769e-06	1	RSRP1
1.07817e-08	0.129375	1	0.995	6.80112e-05	1	MBP
1.74691e-08	0.128899	1	0.988	0.000110195	1	MCRIP1
1.52987e-06	0.127652	1	0.98	0.0096504	1	DIDO1
2.33058e-07	-0.263273	1	1	0.00147013	1	COL3A1
3.38346e-08	-0.266022	0.982	0.953	0.000213429	1	ARPC4
8.16657e-11	-0.294284	0.993	0.968	5.15147e-07	1	RHOA
3.83392e-14	-0.32932	0.996	0.964	2.41843e-10	1	COTL1
1.22498e-09	-0.342086	0.968	0.944	7.72717e-06	1	ENG
1.45985e-19	-0.364573	0.996	0.991	9.20871e-16	1	ITM2B
3.00807e-07	-0.366522	0.972	0.931	0.00189749	1	CD44
6.51546e-11	-0.37658	0.954	0.905	4.10995e-07	1	FMN1
1.80056e-12	-0.425941	0.957	0.929	1.1358e-08	1	TFRC
2.47815e-07	-0.436252	0.964	0.96	0.00156322	1	RNASE1
4.79927e-21	-0.437541	0.996	0.976	3.02738e-17	1	OAZ1
1.25324e-16	-0.440947	0.996	0.984	7.90543e-13	1	FCGRT
1.89015e-09	-0.451238	0.993	0.963	1.19231e-05	1	EIF4A1
5.15601e-26	-0.452659	1	0.997	3.25241e-22	1	CTSD
3.06952e-17	-0.472169	0.996	0.967	1.93625e-13	1	IFITM3
2.48776e-11	-0.49371	0.915	0.914	1.56928e-07	1	IGFBP3
1.22548e-11	-0.50153	0.918	0.908	7.73031e-08	1	CTSC
3.65955e-08	-0.503411	0.84	0.843	0.000230844	1	KCTD12
1.32708e-13	-0.504794	0.972	0.922	8.37121e-10	1	TOMM7
7.29493e-24	-0.507745	1	0.992	4.60164e-20	1	GLUL
5.43096e-07	-0.510843	0.79	0.773	0.00342585	1	ST6GALNAC2
3.2441e-13	-0.513436	0.929	0.879	2.04638e-09	1	BST2
6.38179e-07	-0.527634	0.762	0.762	0.00402563	1	S100A13
2.18347e-10	-0.529161	0.84	0.841	1.37734e-06	1	TMED2
5.74198e-07	-0.533145	0.847	0.848	0.00362204	1	DDX5
1.754e-28	-0.553845	1	0.989	1.10642e-24	1	PABPC1
7.88727e-12	-0.562382	0.89	0.862	4.97529e-08	1	GNAI2
4.25458e-07	-0.576497	0.744	0.789	0.00268379	1	LRP1
1.09194e-16	-0.581074	0.915	0.885	6.88799e-13	1	PFDN5
1.16093e-06	-0.586636	0.555	0.628	0.00732315	1	ACBD6
9.75468e-07	-0.593143	0.722	0.761	0.00615325	1	HLA-E
1.24429e-15	-0.604588	0.943	0.95	7.84897e-12	1	TYROBP
3.54382e-13	-0.62305	0.968	0.937	2.23544e-09	1	C1QC
4.91924e-09	-0.630711	0.676	0.764	3.10306e-05	1	PECAM1
2.53505e-14	-0.634817	0.879	0.915	1.59911e-10	1	LSP1
1.60045e-08	-0.657718	0.584	0.674	0.000100957	1	GABARAPL1
2.25783e-09	-0.658825	0.698	0.723	1.42424e-05	1	SF3B1
5.01285e-07	-0.688086	0.559	0.627	0.00316211	1	VSIG4
3.46718e-08	-0.691125	0.733	0.75	0.00021871	1	HNRNPA3
1.25895e-13	-0.696846	0.961	0.904	7.94146e-10	1	ASAH1
6.33343e-08	-0.724391	0.52	0.624	0.000399513	1	GMFG
5.74923e-07	-0.748645	0.779	0.774	0.00362662	1	CD99
3.86074e-12	-0.75452	0.858	0.853	2.43535e-08	1	CAPG
1.22413e-14	-0.758185	1	0.962	7.72181e-11	1	VIM
1.3428e-10	-0.783349	0.58	0.677	8.47036e-07	1	CTSS
5.91749e-14	-0.78769	0.74	0.834	3.73275e-10	1	SPI1
9.95385e-15	-0.811894	0.669	0.768	6.27889e-11	1	NOP53
7.17459e-08	-0.818549	0.423	0.545	0.000452573	1	KIAA0930
2.00113e-08	-0.820666	0.512	0.616	0.000126231	1	PLD3
2.96775e-07	-0.821638	0.641	0.68	0.00187206	1	CORO1A
7.13289e-12	-0.8562	0.591	0.687	4.49943e-08	1	VAMP8
6.45492e-12	-0.863027	0.68	0.747	4.07176e-08	1	ITGB2
2.69322e-08	-0.877304	0.441	0.56	0.000169888	1	PLXNC1
9.47191e-08	-0.878464	0.502	0.595	0.000597488	1	HDLBP
7.72656e-45	-0.893703	0.996	0.969	4.87391e-41	1	B2M
2.33249e-07	-0.899184	0.37	0.494	0.00147133	1	AKNA
4.73893e-12	-0.921919	0.616	0.687	2.98932e-08	1	SDCBP
1.34118e-13	-0.940537	0.601	0.697	8.46019e-10	1	IFI30
8.32225e-13	-0.956798	0.463	0.619	5.24967e-09	1	TRIM22
1.61374e-15	-0.95863	0.619	0.787	1.01795e-11	1	AQP1
9.34035e-12	-0.960676	0.786	0.802	5.89189e-08	1	IFI27
1.82524e-12	-0.968011	0.509	0.635	1.15136e-08	1	LST1
1.99137e-12	-0.996243	0.349	0.54	1.25615e-08	1	MCF2L
5.25234e-14	-1.03697	0.616	0.722	3.31318e-10	1	CST3
1.21503e-13	-1.04093	0.473	0.617	7.66439e-10	1	CSTB
1.03946e-06	-1.05703	0.342	0.458	0.00655688	1	MX2
3.68279e-13	-1.06051	0.441	0.615	2.32311e-09	1	SLC15A3
5.10549e-10	-1.06505	0.374	0.522	3.22054e-06	1	CD37
2.67049e-11	-1.07212	0.786	0.81	1.68454e-07	1	ISG15
2.94501e-16	-1.18633	0.463	0.651	1.85771e-12	1	FBP1
8.56424e-40	-1.21335	0.904	0.925	5.40232e-36	1	LYZ
6.40249e-12	-1.29518	0.641	0.738	4.03869e-08	1	ACTB
2.43496e-07	-1.33469	0.302	0.429	0.00153597	1	EEF1G
1.24257e-11	-1.34622	0.249	0.434	7.83811e-08	1	FGR
2.90919e-07	-1.41961	0.221	0.345	0.00183512	1	LTB
1.52727e-17	-1.4374	0.669	0.785	9.63404e-14	1	CFD
4.02146e-28	-1.68929	0.459	0.698	2.53674e-24	1	S100A8
3.53111e-09	-1.75528	0.327	0.466	2.22742e-05	1	CXCL14
1.70989e-07	-1.80752	0.242	0.39	0.0010786	1	TAGLN
3.56941e-19	-1.89018	0.181	0.447	2.25159e-15	1	PTGDS
1.00643e-08	-1.90822	0.278	0.425	6.34859e-05	1	CLU
3.07561e-08	-1.9493	0.189	0.317	0.00019401	1	CHIT1
8.66903e-11	-2.19689	0.285	0.453	5.46843e-07	1	TNXB
1.1201e-06	-2.3617	0.05	0.157	0.00706556	1	GPX3
2.72057e-07	-2.73987	0.221	0.343	0.00171613	1	TMSB4X
3.62472e-07	-3.17976	0.057	0.17	0.00228648	1	SERPINF1
2.23649e-45	9.06706	0.132	0.002	1.41078e-41	2	KRT6B
7.21522e-41	8.47861	0.147	0.004	4.55136e-37	2	F10
2.23649e-45	8.33923	0.132	0.002	1.41078e-41	2	OMD
1.11411e-29	8.09706	0.103	0.002	7.02783e-26	2	SERPINA5
1.74357e-14	7.89327	0.147	0.017	1.09984e-10	2	DES
7.43945e-36	7.74707	0.118	0.002	4.69281e-32	2	KIAA1109
1.54455e-31	7.67903	0.221	0.016	9.74304e-28	2	KRT5
1.04339e-38	7.64123	0.118	0.002	6.58169e-35	2	TMEM200A
1.22844e-50	7.62574	0.176	0.004	7.74901e-47	2	EBF1
6.89904e-22	7.6008	0.088	0.003	4.35192e-18	2	KRT77
5.66412e-26	7.42371	0.088	0.002	3.57293e-22	2	ARHGAP8
8.05932e-37	7.39998	0.147	0.005	5.08382e-33	2	KMT2A
4.54236e-33	7.3942	0.132	0.004	2.86532e-29	2	ANGPTL1
8.84388e-39	7.33436	0.162	0.005	5.57872e-35	2	PREX2
3.47441e-18	7.30752	0.074	0.002	2.19166e-14	2	USPL1
4.43994e-33	7.28744	0.176	0.009	2.80072e-29	2	CTSG
3.52045e-18	7.2643	0.074	0.002	2.2207e-14	2	CAB39L
2.56913e-31	7.25558	0.132	0.005	1.62061e-27	2	ZNF117
1.95275e-48	7.20117	0.206	0.007	1.2318e-44	2	MATN2
6.99189e-22	7.20002	0.088	0.003	4.41048e-18	2	GBE1
6.431e-24	7.19253	0.103	0.004	4.05668e-20	2	REV1
3.47441e-18	7.16211	0.074	0.002	2.19166e-14	2	C1QTNF3
3.44581e-32	7.14811	0.103	0.002	2.17361e-28	2	EMP2
9.197e-25	7.14115	0.132	0.007	5.80147e-21	2	CD47
1.48796e-33	7.13625	0.191	0.01	9.38607e-30	2	PRG4
1.54869e-43	7.13533	0.25	0.014	9.76912e-40	2	MGP
1.70047e-27	7.11374	0.103	0.003	1.07266e-23	2	AKR1C3
3.09103e-13	7.01625	0.074	0.004	1.94982e-09	2	DKC1
2.58944e-57	7.00919	0.294	0.014	1.63342e-53	2	AOX1
2.80371e-34	6.9942	0.162	0.007	1.76858e-30	2	TMEM176A
6.88308e-21	6.95812	0.221	0.026	4.34185e-17	2	CNN1
8.82524e-25	6.94572	0.132	0.007	5.56696e-21	2	NTRK3
2.94663e-20	6.89171	0.088	0.003	1.85874e-16	2	ATG7
3.47441e-18	6.88759	0.074	0.002	2.19166e-14	2	TGS1
2.32968e-62	6.85695	0.353	0.019	1.46956e-58	2	ADAM33
1.31467e-27	6.82196	0.118	0.004	8.29295e-24	2	TWSG1
2.35564e-64	6.79513	0.529	0.05	1.48594e-60	2	TPSB2
6.13332e-22	6.78453	0.132	0.008	3.8689e-18	2	PIK3R1
1.81089e-40	6.78205	0.221	0.011	1.14231e-36	2	PRELP
1.65678e-38	6.77776	0.221	0.012	1.0451e-34	2	ABCA9
5.8109e-07	6.76324	0.044	0.003	0.00366551	2	LANCL1
6.47679e-71	6.74775	0.603	0.06	4.08556e-67	2	TXNIP
1.84954e-67	6.72367	0.574	0.057	1.16669e-63	2	MFAP5
1.38829e-16	6.71893	0.088	0.005	8.75734e-13	2	PRKAG2
3.28683e-14	6.70983	0.074	0.004	2.07333e-10	2	ITGBL1
9.22671e-32	6.70171	0.162	0.007	5.82021e-28	2	PPP1R12A
3.45924e-14	6.69286	0.074	0.004	2.18209e-10	2	PIK3C2B
2.14377e-22	6.66562	0.118	0.006	1.35229e-18	2	SH3BGRL2
1.45551e-19	6.6491	0.118	0.007	9.18138e-16	2	ABCB5
2.19949e-12	6.64562	0.074	0.005	1.38744e-08	2	DEFB1
4.44826e-12	6.63614	0.088	0.007	2.80596e-08	2	CA6
5.39566e-14	6.59009	0.088	0.006	3.40358e-10	2	CASP7
5.8109e-07	6.55083	0.044	0.003	0.00366551	2	RNF19A
9.10739e-15	6.54632	0.088	0.005	5.74494e-11	2	DDR2
1.7184e-18	6.51426	0.147	0.012	1.08397e-14	2	RNASE4
5.03487e-18	6.50273	0.118	0.008	3.176e-14	2	TACSTD2
3.09103e-13	6.49096	0.074	0.004	1.94982e-09	2	NKAP
8.51272e-09	6.45654	0.309	0.113	5.36982e-05	2	SCGB1D2
3.4942e-26	6.45171	0.147	0.008	2.20414e-22	2	EXT1
2.19949e-12	6.44521	0.074	0.005	1.38744e-08	2	KLF5
5.70763e-57	6.43838	0.338	0.02	3.60037e-53	2	FBLN5
1.32901e-10	6.43358	0.088	0.008	8.38342e-07	2	SFT2D2
9.08938e-21	6.42644	0.147	0.011	5.73358e-17	2	PPP2R1B
3.35541e-25	6.42116	0.147	0.008	2.1166e-21	2	SCRG1
1.20807e-44	6.4169	0.294	0.02	7.62049e-41	2	OGT
2.42771e-44	6.41427	0.279	0.017	1.5314e-40	2	LPAR1
7.54955e-12	6.4061	0.059	0.003	4.76226e-08	2	GRIA3
2.45119e-60	6.39357	0.456	0.037	1.54621e-56	2	SRSF5
1.26423e-13	6.37942	0.118	0.011	7.97475e-10	2	NR3C1
3.68642e-17	6.37814	0.103	0.006	2.3254e-13	2	NUP107
4.39374e-33	6.37043	0.176	0.009	2.77157e-29	2	TCF12
3.15066e-25	6.34635	0.206	0.018	1.98743e-21	2	MGST1
3.6187e-21	6.34606	0.103	0.005	2.28268e-17	2	GINM1
7.70891e-12	6.32679	0.059	0.003	4.86278e-08	2	RASSF2
4.19615e-10	6.3171	0.103	0.012	2.64693e-06	2	NCALD
1.90338e-22	6.30475	0.103	0.004	1.20065e-18	2	CLSTN2
4.8816e-59	6.30463	0.971	0.311	3.07931e-55	2	TMSB4X
2.16678e-18	6.29027	0.132	0.01	1.36681e-14	2	CCPG1
1.98821e-28	6.28458	0.176	0.011	1.25416e-24	2	USO1
2.75664e-09	6.28134	0.059	0.004	1.73889e-05	2	MR1
5.20876e-10	6.27704	0.059	0.004	3.28568e-06	2	INTS6L
7.62882e-12	6.27325	0.059	0.003	4.81226e-08	2	ADGRL4
4.00132e-21	6.27077	0.103	0.005	2.52403e-17	2	THBS3
7.7459e-15	6.26736	0.544	0.251	4.88612e-11	2	MUCL1
9.36304e-24	6.26344	0.162	0.011	5.90621e-20	2	ZNF521
7.6898e-26	6.23485	0.132	0.006	4.85072e-22	2	SLPI
2.8197e-13	6.19227	0.103	0.009	1.77866e-09	2	OSBPL8
5.23712e-13	6.18085	0.147	0.019	3.30358e-09	2	STAC2
1.22379e-17	6.16977	0.088	0.004	7.71967e-14	2	CHRDL2
4.15177e-10	6.16854	0.103	0.012	2.61894e-06	2	SCGB2A2
7.91119e-11	6.16693	0.059	0.003	4.99038e-07	2	FKTN
1.49548e-34	6.16435	0.25	0.019	9.43346e-31	2	ABCA8
3.38923e-14	6.14443	0.074	0.004	2.13793e-10	2	FAM111A
1.06929e-16	6.14391	0.118	0.009	6.74509e-13	2	CHIC2
3.43529e-07	6.13435	0.059	0.006	0.00216698	2	SLC13A3
1.34208e-19	6.12529	0.147	0.012	8.46582e-16	2	HSPA1B
1.53205e-15	6.1072	0.118	0.01	9.66416e-12	2	PRUNE2
5.94754e-07	6.03452	0.044	0.003	0.00375171	2	TSPAN6
6.03934e-11	6.03155	0.074	0.005	3.80961e-07	2	RGS2
2.75664e-09	6.02805	0.059	0.004	1.73889e-05	2	SLC25A27
4.45058e-26	6.02253	0.279	0.033	2.80742e-22	2	SFRP1
5.19199e-15	6.01829	0.118	0.01	3.27511e-11	2	XPA
4.08428e-21	6.01478	0.176	0.016	2.57636e-17	2	TJP1
1.33261e-36	6.0066	0.324	0.031	8.40608e-33	2	NTRK2
5.06661e-14	5.99748	0.118	0.011	3.19602e-10	2	ZMAT1
2.19949e-12	5.98718	0.074	0.005	1.38744e-08	2	GALNT12
1.97027e-09	5.98709	0.088	0.01	1.24285e-05	2	FAM160B1
1.34208e-19	5.9815	0.147	0.012	8.46582e-16	2	NEBL
1.2041e-12	5.96286	0.088	0.007	7.59549e-09	2	GNA13
3.1562e-26	5.95994	0.235	0.023	1.99093e-22	2	ITGB4
2.36618e-14	5.95172	0.103	0.008	1.49258e-10	2	AIF1L
1.51535e-46	5.94496	0.368	0.031	9.55884e-43	2	PLXDC2
1.76276e-08	5.94185	0.074	0.007	0.000111195	2	EPB41L2
4.29497e-09	5.92542	0.088	0.01	2.70927e-05	2	CBLB
4.74552e-14	5.91191	0.118	0.011	2.99347e-10	2	SEL1L
5.48814e-14	5.89654	0.088	0.006	3.46192e-10	2	EDNRA
2.67113e-29	5.89574	0.25	0.023	1.68495e-25	2	ABI3BP
4.75092e-12	5.87674	0.088	0.007	2.99688e-08	2	BORCS7
1.19775e-17	5.87588	0.088	0.004	7.55541e-14	2	MID2
1.22379e-17	5.87337	0.088	0.004	7.71967e-14	2	COG3
5.20876e-10	5.84103	0.059	0.004	3.28568e-06	2	PPTC7
2.75664e-09	5.84002	0.059	0.004	1.73889e-05	2	SPDEF
1.0008e-23	5.83524	0.088	0.002	6.31307e-20	2	MAOA
2.73942e-56	5.82959	0.75	0.141	1.72803e-52	2	SERPINF1
5.7259e-18	5.81972	0.103	0.006	3.6119e-14	2	INMT
5.4417e-14	5.79322	0.088	0.006	3.43263e-10	2	LPCAT2
2.34051e-12	5.79286	0.074	0.005	1.47639e-08	2	PPP2R5E
2.87019e-24	5.78548	0.176	0.013	1.81052e-20	2	C12orf75
2.21911e-12	5.78044	0.074	0.005	1.39981e-08	2	UBE2K
2.21911e-12	5.77996	0.074	0.005	1.39981e-08	2	TTYH1
1.05996e-38	5.77813	0.353	0.035	6.68622e-35	2	NRP1
1.06284e-18	5.76523	0.118	0.007	6.70442e-15	2	ZNF347
9.22327e-26	5.76165	0.25	0.027	5.81804e-22	2	SERINC1
2.47143e-18	5.75774	0.191	0.022	1.55897e-14	2	TCEAL9
1.27006e-07	5.75452	0.059	0.005	0.000801153	2	PANK3
3.84941e-10	5.74792	0.088	0.009	2.42821e-06	2	RNF141
2.67865e-11	5.74742	0.162	0.026	1.68969e-07	2	PPP1R1B
5.20876e-10	5.74729	0.059	0.004	3.28568e-06	2	RHPN2
9.02757e-08	5.73824	0.074	0.008	0.000569459	2	PKP1
1.15971e-17	5.72857	0.088	0.004	7.31547e-14	2	AGT
8.33385e-10	5.7215	0.074	0.006	5.25699e-06	2	ZCCHC2
3.28988e-13	5.72115	0.118	0.012	2.07526e-09	2	CNIH1
1.17006e-08	5.71881	0.059	0.005	7.38077e-05	2	KIAA1324
5.27036e-26	5.68466	0.191	0.015	3.32454e-22	2	LTBP1
2.3962e-15	5.66003	0.132	0.012	1.51152e-11	2	PRCP
4.10283e-08	5.65265	0.074	0.008	0.000258807	2	ZNF25
1.45225e-11	5.64628	0.206	0.041	9.16078e-08	2	PDCD4
1.00576e-17	5.64473	0.221	0.031	6.34433e-14	2	HMCN2
6.1725e-37	5.64391	0.485	0.077	3.89362e-33	2	PI16
7.47168e-11	5.62432	0.059	0.003	4.71314e-07	2	MYH14
2.2452e-10	5.62263	0.103	0.012	1.41627e-06	2	NQO2
1.34741e-07	5.61016	0.059	0.005	0.000849947	2	GALNT7
7.8483e-22	5.6082	0.221	0.025	4.95071e-18	2	ISCU
5.8109e-07	5.60371	0.044	0.003	0.00366551	2	IGIP
4.20941e-08	5.60124	0.059	0.005	0.000265529	2	NOSTRIN
3.71943e-14	5.59718	0.147	0.017	2.34622e-10	2	SESTD1
1.32113e-07	5.59361	0.059	0.005	0.000833371	2	ZFP30
1.23114e-06	5.5813	0.074	0.01	0.00776602	2	FAM107B
1.74266e-09	5.55498	0.103	0.013	1.09927e-05	2	GFPT1
1.66836e-19	5.55383	0.118	0.007	1.0524e-15	2	SYPL1
1.73673e-11	5.55294	0.103	0.01	1.09553e-07	2	EXOC6B
9.51472e-13	5.54914	0.132	0.015	6.00189e-09	2	TMOD3
3.43529e-07	5.54339	0.059	0.006	0.00216698	2	RAPH1
4.94524e-11	5.54255	0.088	0.008	3.11946e-07	2	ANKIB1
3.92731e-17	5.53311	0.103	0.006	2.47735e-13	2	FMNL2
7.30451e-16	5.52486	0.191	0.026	4.60768e-12	2	DAD1
2.99043e-14	5.51952	0.176	0.025	1.88636e-10	2	KCNK5
2.34051e-12	5.51491	0.074	0.005	1.47639e-08	2	HMGCL
6.28034e-11	5.50709	0.074	0.005	3.96164e-07	2	ADGRL1
4.59432e-16	5.49935	0.118	0.009	2.8981e-12	2	ITPRID2
2.38086e-15	5.48599	0.132	0.012	1.50185e-11	2	WNT11
2.10725e-11	5.48212	0.118	0.014	1.32926e-07	2	PPFIBP2
1.35623e-20	5.46458	0.176	0.016	8.55508e-17	2	YAP1
5.46296e-25	5.46417	0.235	0.024	3.44603e-21	2	RBM5
1.41695e-10	5.46246	0.088	0.008	8.9381e-07	2	FRZB
7.76195e-11	5.45273	0.059	0.003	4.89624e-07	2	AAK1
1.01649e-08	5.44263	0.103	0.014	6.41199e-05	2	TPP2
5.90165e-07	5.41552	0.044	0.003	0.00372276	2	CUL2
3.59783e-10	5.40605	0.088	0.009	2.26951e-06	2	TBX1
1.17862e-20	5.39307	0.191	0.019	7.43475e-17	2	KLC1
2.46599e-10	5.38775	0.074	0.006	1.55555e-06	2	RORA
2.44286e-16	5.37929	0.103	0.007	1.54096e-12	2	HID1
8.80876e-10	5.37589	0.103	0.012	5.55657e-06	2	CINP
1.23114e-06	5.36762	0.074	0.01	0.00776602	2	CDK13
4.21834e-11	5.36049	0.103	0.011	2.66093e-07	2	KIT
2.24022e-19	5.35287	0.176	0.017	1.41313e-15	2	CA12
2.14567e-09	5.35125	0.088	0.01	1.35349e-05	2	PXDC1
2.7539e-09	5.3463	0.074	0.007	1.73716e-05	2	ARMCX2
7.47168e-11	5.31627	0.059	0.003	4.71314e-07	2	DCAF12L2
9.47641e-13	5.3154	0.103	0.009	5.97772e-09	2	NT5DC1
3.1842e-16	5.31382	0.132	0.012	2.00859e-12	2	JPH2
6.86889e-07	5.29931	0.074	0.01	0.00433289	2	CEBPZOS
3.66961e-13	5.28461	0.191	0.031	2.31479e-09	2	FXYD5
1.59259e-09	5.27417	0.103	0.013	1.0046e-05	2	IRAK3
2.69689e-18	5.27004	0.191	0.022	1.7012e-14	2	PTGES
1.29535e-07	5.26928	0.059	0.005	0.000817108	2	MMP28
3.51238e-14	5.26441	0.176	0.025	2.21561e-10	2	FGD5
1.88395e-14	5.26164	0.132	0.013	1.1884e-10	2	ABCA3
2.46037e-09	5.26106	0.074	0.007	1.552e-05	2	CORO6
1.64005e-13	5.25806	0.176	0.026	1.03454e-09	2	PAFAH1B2
1.2307e-11	5.25569	0.132	0.017	7.76325e-08	2	FZD4
3.59783e-10	5.25433	0.088	0.009	2.26951e-06	2	SGCA
1.3386e-07	5.24797	0.059	0.005	0.000844387	2	ZNF41
1.76276e-08	5.24629	0.074	0.007	0.000111195	2	SPTB
3.77087e-07	5.24042	0.25	0.09	0.00237866	2	KRT15
2.479e-16	5.23694	0.176	0.021	1.56375e-12	2	PRKAA1
1.80053e-08	5.22986	0.088	0.011	0.000113578	2	FBXL3
1.34284e-09	5.21915	0.118	0.017	8.47063e-06	2	EPS8L2
5.06759e-16	5.2032	0.176	0.022	3.19664e-12	2	BMP2K
4.00337e-24	5.19788	0.279	0.036	2.52533e-20	2	ADD1
5.8109e-07	5.19474	0.044	0.003	0.00366551	2	VIPR1
5.6778e-14	5.19294	0.088	0.006	3.58155e-10	2	LMBRD1
1.83844e-14	5.18959	0.176	0.024	1.15969e-10	2	SDC2
2.53239e-22	5.18312	0.118	0.006	1.59743e-18	2	ANKRD29
4.29557e-08	5.18279	0.074	0.008	0.000270964	2	CDRT4
5.90165e-07	5.18004	0.044	0.003	0.00372276	2	ESRRB
2.43831e-09	5.1654	0.118	0.017	1.53809e-05	2	CPSF3
1.77317e-08	5.16304	0.088	0.011	0.000111851	2	TSN
1.46918e-10	5.15969	0.147	0.023	9.26757e-07	2	MPHOSPH8
4.28935e-11	5.14791	0.118	0.014	2.70572e-07	2	FAM98B
3.22018e-08	5.14511	0.118	0.02	0.000203129	2	ABCD3
6.46441e-09	5.13834	0.118	0.018	4.07775e-05	2	SLC35E2B
1.20677e-24	5.13759	0.221	0.021	7.61233e-21	2	FGF7
2.33283e-11	5.13579	0.132	0.017	1.47155e-07	2	ELK4
5.29962e-10	5.11598	0.176	0.035	3.343e-06	2	CYBRD1
3.35344e-08	5.10333	0.088	0.011	0.000211535	2	MAMDC2
3.33561e-12	5.10025	0.176	0.029	2.1041e-08	2	TGFBR3
1.16013e-46	5.09678	0.956	0.419	7.3181e-43	2	TNXB
3.61085e-08	5.08627	0.088	0.011	0.000227773	2	CDC73
1.23114e-06	5.07389	0.074	0.01	0.00776602	2	CCDC71
4.51212e-09	5.07339	0.088	0.01	2.84625e-05	2	FUT11
4.29497e-09	5.06397	0.088	0.01	2.70927e-05	2	DENND11
4.52461e-11	5.06387	0.103	0.011	2.85413e-07	2	CMKLR1
1.48726e-23	5.05682	0.412	0.085	9.38161e-20	2	CD9
8.88846e-08	5.0541	0.132	0.026	0.000560684	2	SFSWAP
9.66384e-09	5.04996	0.103	0.014	6.09595e-05	2	ECPAS
3.94071e-16	5.04505	0.265	0.049	2.4858e-12	2	TAOK1
5.12974e-10	5.03735	0.118	0.016	3.23584e-06	2	RARS2
4.24682e-12	5.01203	0.176	0.029	2.67889e-08	2	CPQ
7.57571e-11	5.00867	0.118	0.015	4.77876e-07	2	HOXD8
2.07352e-07	5.00558	0.162	0.039	0.00130797	2	KRT18
3.01372e-10	5.00459	0.132	0.02	1.90105e-06	2	PARVA
4.68837e-09	4.99938	0.088	0.01	2.95742e-05	2	GALNT1
2.19296e-24	4.99196	0.353	0.059	1.38332e-20	2	TM9SF3
8.96818e-15	4.97299	0.147	0.016	5.65713e-11	2	HNMT
7.06165e-09	4.96298	0.074	0.007	4.45449e-05	2	MYOM1
6.25001e-13	4.96295	0.191	0.032	3.9425e-09	2	TNFAIP2
3.11716e-20	4.95364	0.426	0.107	1.96631e-16	2	COL5A2
1.79095e-10	4.94512	0.176	0.033	1.12973e-06	2	CLASP1
1.59804e-08	4.94478	0.118	0.019	0.000100804	2	RAB8A
1.96393e-08	4.94288	0.074	0.007	0.000123885	2	METTL16
3.11343e-09	4.93848	0.147	0.027	1.96395e-05	2	GALNT10
1.31403e-06	4.92369	0.074	0.01	0.00828888	2	MOAP1
9.52113e-11	4.90281	0.147	0.023	6.00593e-07	2	C1QTNF2
2.66779e-08	4.90196	0.103	0.015	0.000168284	2	WNK2
1.58223e-06	4.88312	0.118	0.025	0.0099807	2	NUP50
2.32858e-10	4.87563	0.147	0.024	1.46887e-06	2	ADGRD1
3.92679e-07	4.87363	0.103	0.017	0.00247702	2	NNT
3.19182e-09	4.8621	0.147	0.027	2.0134e-05	2	TM4SF1
4.35515e-10	4.86033	0.103	0.012	2.74723e-06	2	TMOD1
1.01896e-07	4.83381	0.147	0.032	0.000642757	2	MYH10
5.66042e-17	4.83221	0.221	0.032	3.5706e-13	2	ANKRD13A
8.10881e-14	4.81992	0.162	0.021	5.11504e-10	2	NTN4
1.0545e-08	4.81527	0.103	0.014	6.65178e-05	2	RNF180
6.0731e-36	4.81063	0.853	0.396	3.83091e-32	2	CLU
7.8213e-19	4.80558	0.309	0.058	4.93368e-15	2	COL14A1
6.04035e-07	4.80442	0.044	0.003	0.00381025	2	C4orf19
4.0729e-11	4.80197	0.103	0.011	2.56919e-07	2	FAT1
9.24037e-09	4.79566	0.088	0.01	5.82882e-05	2	GOLT1B
6.16804e-08	4.79123	0.088	0.012	0.00038908	2	TBC1D5
3.65409e-07	4.78235	0.059	0.006	0.002305	2	KRT23
6.325e-14	4.77661	0.25	0.05	3.98981e-10	2	DPYSL2
5.4276e-13	4.77635	0.191	0.032	3.42373e-09	2	CKB
5.8109e-07	4.77036	0.044	0.003	0.00366551	2	CCDC149
3.83909e-07	4.76142	0.132	0.028	0.0024217	2	PHF11
4.12646e-08	4.7193	0.074	0.008	0.000260297	2	MYRIP
2.44802e-13	4.69716	0.25	0.052	1.54421e-09	2	COPZ2
3.87355e-12	4.69447	0.294	0.079	2.44343e-08	2	NFIX
3.62868e-08	4.69136	0.088	0.011	0.000228897	2	MSL2
5.17146e-10	4.69135	0.206	0.047	3.26216e-06	2	RBPMS
1.86015e-07	4.68035	0.088	0.012	0.00117338	2	ERCC3
4.57072e-12	4.67029	0.118	0.013	2.88321e-08	2	HINT3
7.6389e-10	4.67026	0.147	0.025	4.81862e-06	2	BTBD9
5.54694e-09	4.66044	0.103	0.014	3.49901e-05	2	COX7B
4.98247e-10	4.65441	0.132	0.02	3.14294e-06	2	BACE1
9.53007e-23	4.65062	0.618	0.232	6.01157e-19	2	C3
4.53793e-09	4.63102	0.147	0.027	2.86253e-05	2	UBXN4
4.6616e-10	4.60094	0.206	0.047	2.94053e-06	2	STAG2
1.24671e-22	4.58672	0.618	0.232	7.86425e-19	2	COL5A1
6.43592e-16	4.57521	0.382	0.106	4.05978e-12	2	SLC29A1
1.26057e-11	4.57359	0.162	0.025	7.95168e-08	2	GBP2
3.19296e-09	4.57125	0.221	0.057	2.01412e-05	2	ARID4A
6.03889e-09	4.56431	0.103	0.014	3.80933e-05	2	LCLAT1
7.15843e-27	4.5628	0.647	0.224	4.51554e-23	2	SLIT3
4.15074e-08	4.55323	0.059	0.005	0.000261829	2	KLHL3
1.32499e-07	4.55144	0.147	0.032	0.000835806	2	TPD52L1
1.25414e-06	4.54868	0.132	0.03	0.00791112	2	MON2
2.82695e-07	4.54108	0.147	0.033	0.00178324	2	SH3RF1
5.17222e-07	4.53895	0.118	0.023	0.00326264	2	DSTN
1.72748e-07	4.53463	0.191	0.052	0.00108969	2	MAP1A
8.00958e-11	4.52893	0.118	0.015	5.05244e-07	2	GPC6
1.96209e-11	4.50076	0.162	0.026	1.23769e-07	2	EFS
6.86423e-07	4.49936	0.118	0.023	0.00432996	2	RXRB
1.65863e-07	4.49843	0.147	0.032	0.00104626	2	FAM180A
4.26715e-11	4.49477	0.118	0.014	2.69172e-07	2	CFAP298
3.01315e-13	4.47559	0.206	0.036	1.90069e-09	2	GPD1
4.78442e-11	4.47465	0.176	0.032	3.01801e-07	2	NCOR1
8.39852e-08	4.47091	0.147	0.031	0.000529779	2	EXOC5
9.58618e-07	4.45716	0.147	0.036	0.00604697	2	NFIA
2.62055e-07	4.45636	0.103	0.017	0.00165304	2	EBF3
6.25062e-09	4.44741	0.221	0.059	3.94289e-05	2	ANKRD36C
7.02106e-07	4.41334	0.118	0.023	0.00442888	2	THUMPD1
9.51704e-07	4.40652	0.206	0.066	0.00600335	2	CD46
5.42952e-24	4.40299	0.574	0.179	3.42494e-20	2	SVEP1
1.35174e-11	4.40258	0.074	0.005	8.52675e-08	2	LMBR1L
3.33957e-07	4.38628	0.176	0.047	0.0021066	2	PARM1
3.23747e-09	4.38423	0.147	0.027	2.0422e-05	2	N4BP2L2
5.65989e-12	4.37645	0.162	0.025	3.57026e-08	2	TACR1
1.36334e-41	4.37092	0.941	0.482	8.59992e-38	2	CLEC3B
1.14943e-14	4.36614	0.529	0.239	7.25057e-11	2	HSPB6
5.6009e-16	4.36212	0.294	0.061	3.53305e-12	2	SEC61A1
4.9223e-11	4.35977	0.235	0.055	3.10499e-07	2	NID1
7.33228e-20	4.33556	0.574	0.22	4.62521e-16	2	ADIRF
2.69045e-12	4.33248	0.382	0.132	1.69713e-08	2	F13A1
1.95356e-08	4.3304	0.088	0.011	0.00012323	2	SEMA3F
[truncated: 3,119 more rows]

## Sheet: UKF6_DEG
p_val	avg_log2FC	pct.1	pct.2	p_val_adj	ayes_space	gene
[truncated: 3,500 more rows]

[truncated: 14 more sheets: UKF1_CytoSpace, UKF2_CytoSpace, UKF3_CytoSpace, UKF4_CytoSpace, UKF5_CytoSpace, UKF6_CytoSpace, CD8_Melanoma_genesets, UKF1_NH_Score, UKF2_NH_Score, UKF3_NH_Score, UKF4_NH_Score, UKF5_NH_Score, UKF6_NH_Score, Cell_Type_Percentage]
