# Supplementary material
Source: Research Square preprint supplement (doi:10.21203/rs.3.rs-9692259/v1)
Supplement: Supplementary file 7 [file 8a5ef1a3ae030ceeb95fa4d6.xlsx]

## Sheet: ULM_Enrichment_zscored
	Cholesterol_Metabolism	Fatty_Acid_Oxidation	Fatty_Acid_Synthesis	Glycolysis	Lipid_Uptake_and_Transport	Lipolysis	Oxidative_Phosphorylation	ROS_Production
UKF1-LA-TAM	2.81164	1.37484	2.84382	2.61465	3.55799	2.15841	7.2654	-1.06589
UKF1-Tumor	2.79871	1.13457	2.78088	2.97349	0.433026	1.01728	7.20046	-1.06029
UKF2-LA-TAM	2.71294	2.55195	1.81255	2.57068	3.18658	1.52252	7.43037	-1.72477
UKF2-Tumor	2.02794	2.51754	2.75904	2.53223	-0.498162	0.410077	6.8672	-1.51667
UKF3-LA-TAM	0.395766	2.62287	0	2.537	0	0.598688	4.2139	-0.597136
UKF3-Tumor	0.194859	3.24977	3.58687	2.8562	0	3.48768	5.17919	-1.32722
UKF4-IFN-TAM	1.96749	1.93356	0.0771745	3.08544	0.597951	1.09775	7.51397	-0.540354
UKF4-Tumor	1.5757	2.64346	0.871589	2.38487	0.532337	0.65262	7.66167	-0.869082
UKF5-IFN-TAM	-0.0754081	0	0	2.17776	0	0	1.57659	0
UKF5-Tumor	0.705244	0	0	2.98185	0	0	3.81773	0
UKF6-IFN-TAM	0.672891	0.930266	0	1.70301	2.51246	0	4.27478	-0.702827
UKF6-Tumor	1.0841	1.40656	0	2.3979	0.961667	0	6.24455	-1.77072

## Sheet: IFN-TAM_vs_LA-TAM
gene_set	level_ref	level_test	contrast	estimate	SE	df	t	p_value	n_samples	p_adj
Lipid_Uptake_and_Transport	LA-TAM	IFN-TAM	IFN-TAM - LA-TAM	-1.20507	0.206011	4.17885	-5.84954	0.00371356	6	0.0297084
Fatty_Acid_Synthesis	LA-TAM	IFN-TAM	IFN-TAM - LA-TAM	-1.109	0.408675	3.94624	-2.71366	0.0541186	6	0.216475
Lipolysis	LA-TAM	IFN-TAM	IFN-TAM - LA-TAM	-1.54404	0.740778	4.01712	-2.08435	0.105206	6	0.280549
Cholesterol_Metabolism	LA-TAM	IFN-TAM	IFN-TAM - LA-TAM	-1.73617	1.02667	3.9995	-1.69107	0.166093	6	0.318496
Fatty_Acid_Oxidation	LA-TAM	IFN-TAM	IFN-TAM - LA-TAM	-1.39288	0.906656	4.01239	-1.53628	0.19906	6	0.318496
Oxidative_Phosphorylation	LA-TAM	IFN-TAM	IFN-TAM - LA-TAM	-1.68182	2.04234	4.00237	-0.823478	0.456474	6	0.608633
Glycolysis	LA-TAM	IFN-TAM	IFN-TAM - LA-TAM	-0.28798	0.428203	4.13211	-0.672531	0.536986	6	0.613698
ROS_Production	LA-TAM	IFN-TAM	IFN-TAM - LA-TAM	0.24507	0.932712	3.99611	0.262749	0.805734	6	0.805734

## Sheet: LA-TAM_vs_Tumor
gene_set	level_ref	level_test	contrast	estimate	SE	df	t	p_value	n_samples	p_adj
Lipid_Uptake_and_Transport	Tumor	LA-TAM	LA-TAM - Tumor	1.70972	0.0585716	1262.45	29.1902	1.43055e-143	3	1.14444e-142
Lipolysis	Tumor	LA-TAM	LA-TAM - Tumor	1.10654	0.0557244	1262.66	19.8573	1.40084e-76	3	5.60337e-76
Cholesterol_Metabolism	Tumor	LA-TAM	LA-TAM - Tumor	1.01383	0.0689666	1261.48	14.7003	2.84274e-45	3	7.58065e-45
ROS_Production	Tumor	LA-TAM	LA-TAM - Tumor	0.524705	0.0418402	1262.27	12.5407	4.38144e-34	3	8.76289e-34
Oxidative_Phosphorylation	Tumor	LA-TAM	LA-TAM - Tumor	-0.269727	0.0825961	1261.51	-3.26562	0.0011216	3	0.00179457
Glycolysis	Tumor	LA-TAM	LA-TAM - Tumor	-0.195389	0.0668233	1220.01	-2.92396	0.00351993	3	0.00469323
Fatty_Acid_Oxidation	Tumor	LA-TAM	LA-TAM - Tumor	0.179872	0.0659427	1262.15	2.7277	0.00646617	3	0.0073899
Fatty_Acid_Synthesis	Tumor	LA-TAM	LA-TAM - Tumor	0.0148012	0.0638732	1262.96	0.231729	0.816786	3	0.816786

## Sheet: IFN-TAM_vs_Tumor
gene_set	level_ref	level_test	contrast	estimate	SE	df	t	p_value	n_samples	p_adj
ROS_Production	Tumor	IFN-TAM	IFN-TAM - Tumor	0.95119	0.0315172	1696.56	30.18	1.56327e-160	3	1.25062e-159
Fatty_Acid_Synthesis	Tumor	IFN-TAM	IFN-TAM - Tumor	-0.583334	0.0376279	1697.68	-15.5027	8.49786e-51	3	3.39914e-50
Lipid_Uptake_and_Transport	Tumor	IFN-TAM	IFN-TAM - Tumor	-0.518878	0.0400664	1440.25	-12.9504	2.29761e-36	3	6.12696e-36
Cholesterol_Metabolism	Tumor	IFN-TAM	IFN-TAM - Tumor	-0.272484	0.049307	1696.48	-5.52627	3.78015e-08	3	7.5603e-08
Glycolysis	Tumor	IFN-TAM	IFN-TAM - Tumor	-0.272265	0.0521808	1697.52	-5.21773	2.03376e-07	3	3.25402e-07
Fatty_Acid_Oxidation	Tumor	IFN-TAM	IFN-TAM - Tumor	-0.213841	0.0418249	1696.16	-5.11277	3.53394e-07	3	4.71191e-07
Oxidative_Phosphorylation	Tumor	IFN-TAM	IFN-TAM - Tumor	-0.153378	0.0725469	1696.19	-2.11419	0.0346442	3	0.0395934
Lipolysis	Tumor	IFN-TAM	IFN-TAM - Tumor	-0.0758231	0.0434078	1696.26	-1.74676	0.0808597	3	0.0808597

## Sheet: Tumor_NR_vs_Tumor_R
gene_set	level_ref	level_test	contrast	estimate	SE	df	t	p_value	n_samples	p_adj
Lipid_Uptake_and_Transport	Tumor_R	Tumor_NR	Tumor_NR - Tumor_R	-1.29885	0.402028	4.00631	-3.23074	0.0318807	6	0.255046
Fatty_Acid_Synthesis	Tumor_R	Tumor_NR	Tumor_NR - Tumor_R	0.679717	0.305857	4.0321	2.22233	0.0898402	6	0.359361
Fatty_Acid_Oxidation	Tumor_R	Tumor_NR	Tumor_NR - Tumor_R	1.04236	1.00261	4.00284	1.03965	0.357176	6	0.803597
Oxidative_Phosphorylation	Tumor_R	Tumor_NR	Tumor_NR - Tumor_R	1.40854	1.50336	4.0034	0.936927	0.401799	6	0.803597
Lipolysis	Tumor_R	Tumor_NR	Tumor_NR - Tumor_R	0.402616	0.831299	4.00309	0.484321	0.653463	6	0.841947
ROS_Production	Tumor_R	Tumor_NR	Tumor_NR - Tumor_R	-0.147819	0.356863	3.9983	-0.414217	0.699973	6	0.841947
Glycolysis	Tumor_R	Tumor_NR	Tumor_NR - Tumor_R	0.108284	0.314653	4.00112	0.344137	0.748069	6	0.841947
Cholesterol_Metabolism	Tumor_R	Tumor_NR	Tumor_NR - Tumor_R	0.180727	0.849663	4.00419	0.212704	0.841947	6	0.841947
