# Supplementary material
Source: Research Square preprint supplement (doi:10.21203/rs.3.rs-9692259/v1)
Supplement: Supplementary file 8 [file 8c138b5e1fcabce95bfd512e.xlsx]

## Sheet: Melanoma_TME_Sig_Mat
NAME	Exhausted_CD8	Melanocytic	Neural	Transitory	Activated_CD8	CAF	IFN_TAM	LA_TAM
A4GALT	1	1	1	1	1	110.11	1	1
ABCA7	66.2089	1	1	1	72.715	1	1	1
ABCA8	1	1	1	52.2892	1	138.536	1	1
ABCB1	69.0312	1	1	1	1	1	1	1
ABCB7	1	51.1322	61.259	56.48	1	1	1	1
ABCB9	1	1	1	41.9672	1	1	1	1
ABCC3	1	1	1	1	1	71.1008	1	72.3778
ABCD2	59.8757	1	1	1	1	1	1	1
ABHD6	1	1	1	1	1	1	1	45.9973
ABI3	162.196	1	1	1	1	1	163.928	213.365
ABI3BP	1	1	1	1	1	352.903	1	1
ABLIM1	144.081	1	69.4208	1	185.394	121.846	1	1
ACAD10	1	49.9944	44.3209	46.2402	1	1	1	1
ACAP1	295.664	1	92.0325	1	250.842	1	64.261	1
ACOT7	1	170.896	131.32	203.153	1	97.372	1	1
ACP6	1	55.0623	49.0551	98.5768	1	1	1	1
ACPP	1	1	1	1	1	1	86.4753	67.922
ACRBP	1	1	1	1	1	1	1	76.1679
ACSL5	143.045	1	1	1	102.432	1	94.9484	44.3745
ACSS1	1	1	1	54.0927	1	1	1	1
ACTA2	80.8953	1	1	1	1	254.827	1	1
ACTR5	1	42.8268	1	45.8699	1	1	1	1
ACVR2B	1	1	1	34.6582	1	1	1	1
ADAM12	1	1	1	1	1	135.034	1	1
ADAM28	1	1	1	1	1	1	149.649	220.856
ADAM33	1	1	1	1	1	119.444	1	1
ADAM8	100.822	1	1	1	1	1	158.593	57.5916
ADAMDEC1	1	1	1	1	1	1	1	108.87
ADAMTSL1	1	1	1	1	1	177.224	1	1
ADAMTSL4	1	1	1	1	1	68.948	122.205	43.9129
ADAP2	1	1	1	1	1	1	148.36	316.025
ADARB1	1	1	1	32.5842	1	1	1	1
ADCK2	1	1	1	1	1	1	1	60.3404
ADH1B	1	1	1	1	1	177.957	1	1
ADHFE1	1	49.4445	1	1	1	1	1	1
ADORA2A	117.71	1	1	1	1	1	49.5291	1
ADORA2B	1	1	1	44.2567	1	1	1	1
ADORA3	1	1	1	1	1	1	100.679	316.536
ADRB2	1	1	1	1	1	1	1	48.6498
AFAP1	1	1	65.6482	85.6827	1	116.263	1	1
AFG3L1P	1	42.2155	53.2835	49.4125	1	1	1	1
AGAP2	67.6212	1	1	1	1	1	1	1
AIF1	1	1	1	1	1	1	705.048	630.49
AIF1L	1	108.533	53.0093	110.306	1	1	1	1
AKR1C1	1	1	1	1	1	112.336	1	1
AKR1C3	1	1	1	69.0906	1	177.597	1	1
ALDH1A3	1	1	66.1035	158.82	1	111.376	1	1
ALDH2	1	1	1	1	1	123.827	430.45	294.087
ALDH3B2	1	38.742	1	1	1	1	1	1
ALKBH2	1	79.5644	62.1723	81.6575	1	1	1	1
ALOX5	1	1	1	1	1	1	419.931	221.535
ALPL	1	1	1	1	1	167.066	1	1
ALS2CL	1	1	1	1	1	1	1	43.3666
ALX1	1	80.0533	39.2076	82.1129	1	1	1	1
AMER3	22.0557	1	1	1	26.3147	1	1	1
AMICA1	239.077	1	1	1	183.132	1	387.587	139.588
AMMECR1L	1	62.4599	1	47.6879	1	1	1	1
AMN1	1	53.2881	62.3841	77.2517	1	1	1	1
AMPD3	1	1	1	1	1	1	75.0645	76.0621
ANGPTL1	1	1	1	1	1	89.316	1	1
ANGPTL2	1	1	1	1	1	178.281	1	1
ANGPTL4	1	1	121.365	75.5679	1	137.93	1	1
ANK3	1	1	1	1	62.6637	1	1	1
ANKDD1A	50.2823	1	1	1	1	1	1	34.1436
ANKRD20A12P	1	62.8596	72.2252	78.8624	1	1	1	1
ANKRD22	1	1	1	1	1	1	218.858	79.8738
ANKRD29	1	1	1	1	1	82.7098	1	1
ANKRD32	113.534	1	1	1	1	1	1	1
ANKRD36BP2	30.8111	1	1	1	1	1	1	1
ANKRD37	1	63.2801	1	1	1	1	1	40.0995
ANO9	85.3121	1	1	1	95.2047	1	1	1
ANPEP	1	1	1	1	1	145.483	267.093	55.3094
ANTXR1	1	1	1	1	1	156.065	1	1
ANXA2R	83.8767	1	1	1	1	1	1	1
AOAH	182.896	1	1	1	95.4625	1	446.142	225.918
AOX1	1	1	1	1	1	138.267	1	1
APITD1	1	1	1	50.9431	1	48.3707	1	1
APOBEC3B	1	1	1	1	1	1	75.1933	1
APOC2	1	149.98	144.251	193.877	1	1	1	203.577
APOF	28.9511	1	1	1	40.2367	1	1	1
AQP1	1	1	1	113.233	1	1	1	1
AQP3	1	1	55.9019	52.402	133.728	1	1	1
AQP9	1	1	1	1	1	1	259.675	76.3596
AREG	1	1	1	1	142.232	1	167.458	77.2471
ARHGAP22	1	1	1	1	1	29.5722	1	87.2684
ARHGAP27	97.2914	1	1	1	1	1	154.393	88.6473
ARHGAP5.AS1	1	41.5623	1	1	1	1	1	1
ARHGAP9	357.395	1	66.2415	1	290.325	1	180.139	126.241
ARHGEF10L	1	1	1	1	1	1	121.984	74.6625
ARHGEF11	1	44.6344	1	44.7654	1	1	1	1
ARHGEF35	1	1	1	37.6339	1	1	1	1
ARID3B	67.0701	1	1	1	1	1	36.6253	1
ARL15	1	1	1	45.6357	1	1	1	1
ARMCX2	1	1	1	60.0858	1	143.761	1	1
ARNTL	70.3166	1	1	1	1	1	1	1
ARRDC2	1	1	1	1	1	1	67.9643	89.521
ARSG	1	35.5953	1	1	1	1	1	1
ASAP3	1	1	1	1	1	74.9115	1	1
ASB2	125.035	1	1	1	1	1	1	1
ASB9	1	1	1	61.9812	1	1	1	1
ASGR1	1	1	1	1	1	1	107.889	43.6412
ASGR2	1	1	1	1	1	1	88.9267	1
ASPN	1	1	1	1	1	158.952	1	1
ASRGL1	1	54.3802	1	51.2436	1	1	1	1
ATAD2	53.8394	1	1	1	1	33.5926	1	1
ATE1	1	48.7932	1	1	1	1	1	1
ATF5	1	1	1	1	1	26.1962	194.893	135.633
ATF7IP2	41.5337	1	1	1	1	1	1	1
ATG16L2	1	1	1	1	1	1	101.317	98.8979
ATHL1	201.688	1	1	1	225.678	1	1	1
ATL1	1	1	1	1	1	67.832	1	1
ATMIN	1	1	1	31.7688	1	1	1	1
ATP10A	1	29.4823	1	1	1	1	1	1
ATP10B	1	1	1	38.0265	1	1	1	1
ATP1A2	22.5422	1	1	1	26.9871	1	1	1
ATP2A3	129.342	1	1	1	108.787	1	1	1
ATP8A1	88.326	1	1	1	87.4333	1	1	1
ATP8B4	1	1	1	1	1	1	61.8015	90.5215
AZGP1	1	53.3895	54.1027	110.497	1	1	1	1
B3GALT4	1	1	1	1	1	1	1	74.7685
B3GNT7	1	1	52.3743	68.4951	1	1	1	130.14
B3GNTL1	1	1	1	51.3629	1	1	1	1
B4GALT6	1	1	1	40.2249	1	1	1	1
BAALC	1	1	1	45.277	1	1	1	1
BACE1	1	1	1	1	1	100.931	1	1
BACE2	1	162.016	132.048	165.193	1	71.1826	1	1
BAG2	1	1	1	1	1	96.8568	1	1
BAGE	1	1	49.5317	74.691	1	1	1	1
BAGE5	1	1	1	34.3828	1	1	1	1
BAIAP2L1	1	44.2283	1	1	1	1	1	1
BAMBI	1	81.9944	51.551	98.402	1	1	1	1
BANCR	1	69.731	55.5189	128.863	1	1	1	1
BANK1	1	1	65.9892	1	1	1	1	1
BATF	204.782	1	1	1	185.595	1	118.212	1
BCAN	1	119.695	1	71.4198	1	1	1	1
BCAS4	91.898	1	1	1	1	1	1	1
BCAT2	1	55.5932	1	33.0321	1	1	1	1
BCHE	1	87.4612	1	101.905	1	1	1	1
BCL11A	1	1	64.1434	1	1	1	70.6849	1
BCL11B	184.096	1	1	1	260.835	1	1	1
BCL2	59.5583	37.6512	44.6801	1	99.5834	1	1	1
BCL2L2	1	1	1	39.8272	1	1	1	1
BCL3	1	1	1	1	1	59.7558	110.88	1
BCR	1	1	32.7777	37.6353	1	1	1	1
BEND3P3	31.718	1	1	1	1	1	1	1
BFSP1	1	1	1	47.8823	1	1	1	1
BGN	1	1	1	1	1	453.707	1	1
BIN3	1	146.534	122.453	186.094	1	69.2117	1	1
BIRC7	1	172.753	93.5537	114.911	1	1	1	1
BLNK	1	1	1	1	1	1	1	165.004
BMP2K	1	1	1	1	1	1	56.1733	100.296
BMX	1	1	1	61.7172	1	1	1	1
BOC	1	1	1	1	1	97.1463	1	1
BOK	1	1	1	1	1	77.9887	1	1
BOLA1	1	97.8503	60.8437	78.8204	1	1	1	1
BRD1	1	30.7427	1	1	61.0423	1	1	1
BRE.AS1	1	1	1	1	1	1	110.564	63.1983
BRIX1	1	111.313	125.257	140.192	1	101.736	1	1
BTBD3	1	55.1421	47.2931	104.001	1	1	1	1
BTBD9	1	28.2898	1	26.4706	64.7722	1	1	1
BTK	1	1	1	1	1	1	164.744	136.359
BTLA	88.7764	1	1	1	121.378	1	1	1
BTN2A3P	33.4243	1	1	1	1	1	1	1
BUD13	1	1	1	40.5415	1	1	1	1
BZRAP1	64.3966	1	1	1	1	1	1	1
C10orf10	1	1	74.0624	69.797	1	265.125	1	1
C10orf90	1	63.0014	1	66.1634	1	1	1	1
C11orf71	1	50.139	51.6852	56.9491	1	1	1	1
C11orf75	1	1	1	1	1	61.9808	236.696	153.508
C11orf80	1	31.2349	38.2364	1	1	1	1	1
C12orf52	1	80.3973	62.2968	76.6017	1	1	1	1
C12orf73	1	1	1	45.3908	1	1	1	1
C12orf75	99.951	1	1	1	1	152.779	1	1
C14orf64	78.0277	1	39.9324	1	97.1792	1	26.7523	1
C15orf48	1	1	1	1	1	1	315.39	170.033
C16orf45	1	1	74.4111	82.4434	1	131.589	1	1
C19orf38	1	1	1	1	1	1	169.934	82.6289
C19orf59	1	1	1	1	1	1	210.229	1
C1QA	1	1	1	1	1	1	282.595	725.44
C1QB	1	1	1	1	1	1	256.849	779.835
C1QC	1	1	1	1	1	1	260.509	705.156
C1QTNF1	1	1	45.0629	38.0079	1	78.4838	1	1
C1R	1	1	58.0713	34.4121	1	476.958	1	1
C1S	1	1	1	1	1	532.79	1	1
C1orf162	1	1	1	1	1	1	489.438	328.224
C1orf228	1	1	1	1	1	1	77.6419	1
C1orf54	1	1	1	1	1	142.997	97.4398	267.275
C20orf166.AS1	24.46	1	1	1	1	1	1	1
C20orf96	1	1	1	1	1	1	1	45.1024
C21orf119	1	56.1816	1	60.7662	1	1	1	1
C21orf49	34.7428	1	1	1	53.485	1	1	1
C2CD4A	1	1	1	1	28.9397	1	1	1
C2orf15	42.2309	1	1	1	56.1992	1	29.443	1
C2orf88	1	44.9865	1	1	1	1	1	1
C3	1	1	1	1	1	378.878	126.434	202.11
C3AR1	1	1	1	1	1	1	379.018	428.237
C4B	1	1	1	1	1	72.2884	1	1
C4B.2	1	1	1	1	1	72.2884	1	1
C5AR1	1	1	1	1	1	1	292.334	317.173
C5orf56	200.562	1	1	1	1	1	1	62.0774
C6orf226	1	64.3547	54.3353	70.7987	1	1	1	1
C6orf57	1	1	1	1	1	1	1	57.5888
C7orf55.LUC7L2	1	1	1	42.4651	1	1	1	1
CA12	1	1	1	1	1	138.318	1	1
CA14	1	125.586	1	1	1	1	1	1
CA2	1	1	1	1	1	1	1	47.437
CA8	1	75.8864	56.4052	1	1	1	1	1
CABLES1	1	53.1179	1	1	1	1	1	1
CALD1	1	195.373	193.152	247.471	1	433.372	1	1
CALML4	1	1	1	1	1	1	56.7375	1
CAMK2N1	1	1	1	1	1	72.0559	1	1
CAMK4	89.9104	1	1	1	166.841	1	1	1
CAMP	1	1	1	54.932	1	1	1	1
CAPN3	1	349.594	185.061	310.196	1	1	1	93.8294
CAPS	1	1	51.0115	85.3264	1	1	1	1
CARD11	84.1219	1	1	1	62.3774	1	1	1
CARD9	1	1	1	1	1	1	144.71	48.7071
CARS2	1	1	1	36.226	1	1	1	1
CAV1	1	240.397	214.961	303.944	1	233.093	1	1
CBWD6	1	54.3363	53.1575	32.8881	1	1	1	1
CC2D1A	1	1	1	40.0473	1	1	1	1
CCDC101	1	1	1	1	1	48.7215	81.6028	1
CCDC102B	1	1	1	1	1	129.853	1	1
CCDC104	1	114.784	123.692	123.409	1	92.7495	1	1
CCDC134	1	1	1	44.0263	1	1	1	1
CCDC141	131.168	1	1	1	131.715	1	1	1
CCDC144C	1	51.9989	1	34.3518	1	1	1	1
CCDC171	1	40.5362	1	1	1	1	1	1
CCDC51	1	75.9244	1	66.2222	1	1	1	1
CCDC57	1	43.5034	49.1372	44.3992	1	1	1	1
CCDC64	78.7095	1	1	1	1	1	1	1
CCDC80	1	1	1	1	1	356.586	1	1
CCDC88B	52.3048	1	1	1	1	1	59.2796	1
CCDC88C	124.538	1	1	1	145.121	1	1	1
CCDC92	1	1	1	1	1	81.1184	1	1
CCHCR1	1	39.6682	1	1	1	1	1	1
CCL19	1	1	1	1	1	198.361	1	1
CCL2	1	1	1	1	1	187.689	110.92	212.857
CCL21	1	1	1	1	1	263.681	1	1
CCL3	263.592	1	1	1	1	1	380.921	410.286
CCL3L1	1	1	1	1	1	1	75.1003	1
CCL4	508.042	1	1	1	242.868	1	236.809	273.085
CCL4L1	338.233	1	1	1	182.737	1	173.313	154.224
CCL4L2	338.233	1	1	1	182.737	1	173.313	154.224
CCL8	1	1	1	1	1	1	1	46.9659
CCR1	1	1	1	1	1	1	333.916	301.164
CCR10	1	49.3107	57.6843	52.63	1	1	1	1
CCR2	1	1	1	1	1	1	255.958	1
CCR4	1	1	1	1	114.292	1	1	1
CCR5	237.599	1	1	1	1	1	164.717	98.9896
CCR7	105.38	1	104.191	1	306.252	1	1	1
CCRL2	1	1	1	1	1	1	210.39	84.8102
CCT6P3	1	1	1	31.4636	1	1	1	1
CD101	1	1	1	1	1	1	68.5737	1
CD14	1	1	1	1	1	1	648.727	699.702
CD163	1	1	1	1	1	1	432.733	450.873
CD180	1	1	1	1	1	1	32.137	120.236
CD1C	1	1	1	1	1	1	91.7127	1
CD1D	1	1	1	1	1	1	140.072	77.8537
CD1E	1	1	1	1	1	1	95.374	1
CD2	623.867	1	78.5304	1	592.28	1	1	1
CD200R1	91.4909	1	1	1	1	1	1	1
CD244	74.3837	1	1	1	1	1	53.3495	1
CD247	322.301	1	72.2733	1	323.085	1	1	1
CD248	1	1	1	1	1	325.868	1	1
CD27	467.199	1	1	1	373.174	1	1	1
CD274	1	1	1	1	1	1	51.4783	1
CD28	187.178	1	1	1	256.821	1	1	62.7328
CD300A	1	1	1	1	1	1	243.106	211.333
CD300C	1	1	1	1	1	1	148.849	155.603
CD300E	1	1	1	1	1	1	305.962	54.2843
CD300LB	1	1	1	1	1	1	86.0963	1
CD300LF	1	1	1	1	1	1	120.864	71.2197
CD320	1	188.932	156.683	242.897	1	126.289	1	1
CD33	1	1	1	1	1	1	221.176	143.187
CD34	1	1	1	1	1	100.754	1	1
CD38	222.962	1	1	1	1	1	129.143	142.201
CD3D	686.074	1	1	1	784.433	1	1	1
CD3E	486.69	1	61.1811	1	519.067	1	1	1
CD40	1	1	1	1	1	90.9517	138.241	147.289
CD40LG	1	1	1	1	141.067	1	1	1
CD5	186.285	1	1	1	233.963	1	1	1
CD53	468.919	1	171.131	1	497.793	1	580.511	453.078
CD6	228.912	1	1	1	216.372	1	1	1
CD69	426.993	1	166.347	1	580.896	1	145.428	1
CD7	234.64	1	1	1	202.581	1	1	1
CD72	1	1	1	1	1	1	139.733	247.839
CD79A	1	1	77.0891	1	1	1	1	1
CD79B	81.5237	1	78.2661	1	1	1	1	1
CD86	1	1	1	1	1	1	215.436	297.413
CD8A	547.67	1	1	1	302.361	1	1	1
CD8B	385.793	1	1	1	235.864	1	1	1
CD93	1	1	1	1	1	1	165.05	126.089
CDA	1	1	1	1	1	1	132.645	1
CDC14A	96.192	1	46.4517	1	163.687	1	1	44.0407
CDCA7	1	40.4881	1	1	1	1	1	1
CDCA7L	1	51.411	1	1	1	1	1	46.6188
CDH11	1	1	1	1	1	292.125	1	1
CDH19	1	170.799	174.491	252.528	1	1	1	1
CDH2	1	1	63.1658	52.5577	1	79.9273	1	1
CDH3	1	129.972	1	1	1	1	1	1
CDH6	18.6555	1	1	1	25.4629	1	1	1
CDIP1	1	59.8685	1	42.4647	1	1	1	1
CDK20	1	38.3862	1	1	1	1	1	1
CDKN2A	1	49.6762	1	1	1	1	1	1
CDKN2B	1	1	1	1	1	66.7971	1	1
CDON	1	1	24.755	1	1	32.1102	1	1
CDPF1	1	57.6279	1	1	1	1	1	1
CDR1	1	1	1	1	1	74.6773	1	1
CEACAM1	1	88.8455	91.6772	112.816	1	1	1	1
CEACAM4	1	1	1	1	1	1	90.3487	1
CEBPA	1	1	1	1	1	1	1	83.2634
CELSR1	1	41.1065	1	1	1	1	1	1
CENPM	76.5052	1	1	1	1	36.772	1	1
CEP112	1	1	1	37.2064	1	1	1	1
CEP70	1	1	1	45.2117	1	1	1	1
CEP78	1	45.0537	1	1	1	58.9972	1	1
CERKL	55.8925	1	1	1	64.1774	1	1	51.6588
CERS4	1	89.9298	1	77.3155	1	42.3859	1	1
CFB	1	1	1	45.0064	1	197.561	1	1
CFD	1	1	1	1	1	262.665	358.22	389.628
CFH	1	1	1	1	1	288.335	1	1
CFI	1	1	74.7172	72.7338	1	141.225	1	1
CFP	1	1	1	1	1	1	310.388	1
CH25H	1	1	1	1	1	66.7753	1	1
CHAF1B	1	40.7665	1	41.1865	1	1	1	1
CHAMP1	1	32.8582	1	1	1	1	1	1
CHCHD10	1	1	1	1	1	44.8137	1	88.0291
CHI3L1	1	1	103.118	56.6984	1	116.022	1	1
CHI3L2	101.622	1	55.8824	53.215	1	1	1	1
CHL1	1	55.4867	46.8087	101.142	1	1	1	1
CHN2	1	1	1	1	1	1	40.7507	1
CHRDL1	1	1	1	1	1	115.53	1	1
CHRNA6	1	1	1	52.3078	1	1	1	1
CHTF18	1	1	1	36.8603	1	1	1	1
CHURC1.FNTB	1	45.9282	1	44.3633	1	1	1	1
CIDEB	1	1	1	1	1	1	1	57.6873
CIDECP	1	1	1	44.7334	1	1	1	1
CILP	1	1	1	1	1	123.103	1	1
CISH	1	1	1	1	1	1	110.876	1
CIT	1	1	1	31.2877	1	1	1	1
CITED1	1	69.5158	63.5637	1	1	1	1	1
CKB	1	1	1	1	1	80.3246	1	1
CLEC10A	1	1	1	1	1	1	182.539	70.8129
CLEC12A	1	1	1	1	1	1	203.854	112.18
CLEC3B	1	1	1	1	1	101.282	1	1
CLEC4A	1	1	1	1	1	1	271.547	220.792
CLEC4D	1	1	1	1	1	1	113.939	1
CLEC5A	1	1	1	1	1	1	190.963	78.0594
CLECL1	1	1	1	1	1	1	1	99.5544
CLIC3	82.5814	1	1	1	1	1	1	1
CLIP3	1	1	1	1	1	154.186	1	1
CLMP	1	1	1	1	1	77.5421	1	1
CLPB	1	43.6199	1	46.6891	1	1	1	1
CLSTN3	74.9643	1	1	1	1	102.963	1	1
CLUHP3	74.0359	1	1	1	77.7312	1	1	1
CMAHP	55.7589	1	1	1	1	38.2868	1	1
CMKLR1	1	1	1	1	1	1	77.5388	182.403
CNIH3	1	1	1	63.263	1	1	1	1
CNN3	1	263.08	206.596	302.582	1	390.77	1	1
CNTN1	1	1	1	34.351	1	1	1	1
CNTNAP3B	1	1	1	40.6531	1	1	1	1
COL11A2	1	1	1	77.7558	1	1	1	1
COL12A1	1	1	38.8866	34.9085	1	207.703	1	1
COL14A1	1	1	1	1	1	207.064	1	1
COL1A1	1	1	1	1	1	589.85	1	1
COL1A2	1	1	93.5079	112.839	1	608.729	1	1
COL22A1	1	1	1	43.3818	1	1	1	1
COL3A1	1	1	1	45.6081	1	584.546	1	1
COL4A1	1	1	1	1	1	128.872	1	1
COL4A2	1	1	1	1	1	148.909	1	1
COL5A1	1	1	1	1	1	239.165	1	1
COL5A2	1	1	37.9803	33.1785	1	269.381	1	1
COL6A2	1	1	60.5282	56.8508	1	348.575	1	1
COL6A3	1	1	1	1	1	409.277	1	1
COL8A1	1	1	1	1	1	141.901	1	1
COL9A3	1	1	37.2887	68.3454	1	1	1	1
COLEC12	1	1	1	1	1	75.5456	1	1
COMP	1	1	1	1	1	74.382	1	1
COMTD1	1	43.2032	1	1	1	43.0208	1	1
CORO7.PAM16	1	1	1	1	1	1	1	49.7712
COX7A1	1	1	1	1	1	74.1921	1	1
CP	1	1	53.5653	1	1	114.744	1	1
CPE	1	1	1	1	1	193.432	1	1
CPEB3	1	1	1	1	1	1	1	48.4681
CPNE5	1	1	1	40.4621	1	1	1	1
CPXM1	1	1	1	1	1	238.606	1	1
CPZ	1	1	1	1	1	117.555	1	1
CRABP2	1	1	1	1	1	142.056	1	1
CREB3L1	1	1	1	1	1	71.3155	1	1
CREB3L4	1	1	1	49.848	1	1	1	1
CRIP2	1	160.913	185.347	291.322	1	147.403	1	1
CRISPLD1	1	43.9985	1	45.5443	1	1	1	1
CRISPLD2	1	1	27.4729	1	1	179.756	33.7767	1
CROCC	1	24.9924	1	1	1	1	1	1
CRYAB	1	184.269	213.33	277.166	1	237.238	1	1
CSAG1	1	97.8235	109.677	135.947	1	1	1	1
CSAG2	1	1	42.0871	59.9644	1	1	1	1
CSAG3	1	54.9806	77.2512	102.34	1	1	1	1
CSAG4	1	1	1	49.5706	1	1	1	1
CSF1	111.783	1	1	1	1	149.501	1	1
CSF1R	1	1	1	1	1	1	436.382	474.409
CSF2RB	1	1	1	1	1	1	127.038	58.4753
CSF3R	1	1	1	1	1	1	383.406	158.643
CSGALNACT1	1	71.1522	114.705	150.701	1	1	1	1
CSNK1G2	1	1	33.8318	34.2655	1	1	1	1
CSPG4	1	179.964	151.852	263.738	1	38.7557	1	1
CST7	548.932	1	77.6839	1	327.712	1	63.7652	1
CSTA	1	1	1	1	1	1	283.661	123.187
CTGF	1	1	79.0228	121.995	1	352.519	1	1
CTH	1	51.6822	1	29.2236	1	1	1	1
CTHRC1	1	177.623	154.683	260.776	1	277.094	1	1
CTLA4	246.218	1	1	1	213.224	1	1	1
CTNNBIP1	1	1	1	32.8725	1	1	1	1
CTSW	354.274	1	1	1	185.17	1	1	1
CTSZ	1	1	1	1	1	1	1	96.5791
CTTN	1	249.403	226.823	331.33	1	371.559	1	1
CTTNBP2	1	28.984	1	1	1	1	1	1
CX3CL1	1	1	1	35.5601	1	1	1	1
CX3CR1	1	1	1	1	1	1	126.447	1
CXCL10	1	1	1	1	1	1	159.591	121.507
CXCL12	1	1	1	1	1	450.082	1	205.103
CXCL13	266.117	1	1	1	192.902	1	1	1
CXCL14	1	1	1	1	1	323.477	1	1
CXCL2	1	1	1	1	1	85.3039	216.377	178.143
CXCL3	1	1	1	1	1	1	175.193	112.761
CXCL9	1	1	1	1	1	1	134.397	150.935
CXCR2P1	1	1	1	1	1	1	113.012	177.142
CXCR3	250.156	1	1	1	134.224	1	1	1
CXCR6	264.82	1	1	1	1	1	1	1
CXCR7	1	1	1	1	1	153.58	1	1
CYB5D1	1	1	1	1	1	1	54.3214	1
CYBB	1	1	1	1	1	1	482.082	449.944
CYGB	1	1	1	1	1	105.267	1	1
CYP1B1	1	1	1	1	1	240.097	1	1
CYP2J2	1	1	1	38.8622	1	1	1	1
CYP2S1	1	1	1	1	1	1	62.9908	79.0802
CYR61	1	1	58.7409	45.8355	1	422.513	1	1
CYSLTR1	1	1	1	1	1	1	81.2692	1
CYTIP	397.231	1	134.605	1	512.188	1	223.394	132.132
CYTL1	1	1	1	72.5151	1	1	1	1
DAAM2	1	88.3847	78.405	103.007	1	1	1	1
DAB2IP	1	1	1	36.0455	1	1	1	1
DAPK2	52.7334	1	1	1	1	1	1	1
DBNDD1	1	77.1136	48.2915	72.5206	1	1	1	1
DCAF4	1	41.3346	1	1	1	1	1	1
DCDC2	27.4328	1	1	1	39.9538	1	1	1
DCLK1	1	1	1	1	1	102.742	1	1
DCN	1	1	1	1	1	591.886	1	1
DCT	1	253.694	1	89.2714	1	1	1	82.645
DDAH1	1	1	1	1	1	145.503	1	1
DDR1	1	71.3849	108.931	122.618	1	21.674	1	1
DDX20	1	40.2591	1	1	1	1	1	1
DDX26B	77.7148	1	1	1	1	1	60.3887	1
DDX59	1	60.6306	58.8757	69.1403	1	1	1	1
DENND1C	182.798	1	1	1	185.847	1	67.0321	101.497
DENND2D	403.961	58.4108	65.3298	1	353.653	1	1	48.09
DENND3	1	1	1	1	1	1	192.012	134.699
DEPTOR	1	1	1	1	1	93.8742	1	1
DET1	1	39.61	1	1	1	1	1	1
DGKA	247.992	1	79.7012	1	374.108	41.0706	95.8822	1
DGKH	84.5977	1	1	1	70.6988	1	1	1
DGKZ	113.099	1	1	1	106.134	1	52.1005	53.7825
DHFRL1	1	35.0461	1	1	1	1	1	1
DHRS9	1	1	1	1	1	1	1	92.8182
DHX58	1	1	1	1	1	1	73.9851	65.2191
DIRC1	41.7717	1	1	1	51.2639	1	1	1
DKFZP686I15217	39.1849	1	1	1	1	1	1	34.5519
DKFZp686O1327	1	27.4175	1	1	1	1	1	1
DKK1	1	1	1	1	1	144.311	1	1
DKK3	1	1	1	50.4479	1	160.883	1	1
DLEU1	1	62.7605	1	60.5915	1	1	1	1
DLGAP1	1	55.2599	1	45.2501	1	1	1	1
DLL3	1	37.914	1	1	1	1	1	1
DMKN	1	59.8775	1	1	1	1	1	1
DNAH14	1	59.9301	50.2629	51.3252	1	1	1	1
DNAH9	1	1	1	39.7929	1	1	1	1
DNAJC21	1	1	46.0175	49.0765	1	35.9607	1	1
DNAL4	1	53.7588	50.8005	59.2619	1	1	1	1
DNM1	1	1	1	1	1	72.6	1	1
DNM1P35	1	1	1	1	28.1804	1	1	1
DNM3OS	1	1	1	1	1	76.7112	1	1
DNMBP	1	1	1	1	1	96.6132	1	1
DNTTIP1	1	40.4836	65.891	82.2055	1	1	1	1
DOK2	244.606	1	1	1	167.042	1	274.159	196.425
DOK3	1	1	1	1	1	1	246.928	245.011
DOK5	1	1	1	1	1	94.4849	1	1
DOLPP1	1	1	1	55.5738	1	38.7726	1	1
DPEP2	1	1	1	1	1	1	65.7622	86.3135
DPT	1	1	1	1	1	257.112	1	1
DPYSL3	1	1	1	30.9623	1	150.085	1	1
DSC2	1	1	1	1	1	1	131.644	98.0285
DSCAM.AS1	38.2794	1	34.8002	1	46.4522	1	1	1
DSCR8	1	1	51.7444	47.6123	1	1	1	1
DTHD1	180.856	1	1	1	117.286	1	1	1
DTX2P1.UPK3BP1.PMS2P11	70.9193	1	1	1	1	1	1	43.6005
DUS1L	1	41.2488	47.605	61.3599	1	1	1	1
DUS4L	1	1	1	47.8771	1	1	1	1
DUSP16	83.5471	1	1	1	87.2712	1	1	1
DYNC1I1	1	1	1	78.425	1	1	1	1
EAF2	1	1	1	1	1	1	71.9321	131.386
EARS2	1	44.3549	1	51.7506	1	1	1	1
EBF1	1	1	41.2819	1	1	227.887	1	1
EBF2	1	1	1	1	1	94.017	1	1
EBI3	1	1	1	1	1	1	1	110.7
ECI1	1	1	1	42.1398	1	1	1	1
ECM2	1	1	1	1	1	92.7539	1	1
ECT2L	1	1	1	1	23.976	1	1	1
EDNRB	1	222.306	122.109	213.49	1	1	1	1
EFCAB13	1	1	36.8207	37.8522	1	1	1	1
EFEMP1	1	1	1	1	1	353.503	1	1
EFEMP2	1	1	1	61.1522	1	277.26	1	1
EFHD2	1	1	1	1	1	28.3007	153.57	105.506
EFNA1	1	62.1975	79.3647	108.712	1	1	1	1
EGFL7	1	1	1	1	1	1	1	70.6374
EGFL8	1	128.684	46.168	87.1353	1	1	1	1
EGFR	1	1	1	1	1	141.768	1	1
EGLN3	1	1	1	1	1	1	1	86.1025
EHD3	1	1	1	58.2512	1	29.7337	1	1
EIF2AK3	1	1	38.5559	34.0325	1	1	1	1
EIF4E3	53.4187	1	1	1	1	1	1	1
ELF4	59.3502	1	1	1	1	1	46.6694	1
ELN	1	1	1	1	1	198.098	1	1
ELOVL2	1	1	1	95.4529	1	1	1	1
EMILIN1	1	1	1	1	1	120.377	1	1
EMILIN2	1	1	1	1	1	1	85.6026	90.3217
EML1	1	1	1	1	1	78.1828	1	1
EMR2	1	1	30.3861	1	1	1	159.823	61.6417
EMR3	1	1	1	1	1	1	65.7605	1
ENGASE	1	31.362	1	1	1	1	1	1
ENTHD1	1	93.1688	41.3986	64.1685	1	1	1	1
EOMES	109.191	1	1	1	1	1	1	1
EPHB2	1	1	1	1	1	1	1	59.6711
EPHX2	1	51.1993	67.9797	76.0191	1	1	1	1
ERF	1	36.9081	1	1	1	1	1	1
ERN1	62.7341	1	34.5724	1	75.9676	1	1	1
ERRFI1	1	1	98.1394	73.7087	1	159.969	1	1
ERV3.1	1	1	72.1893	77.5646	1	1	1	54.0493
ESRP1	1	53.9961	1	1	1	1	1	1
ETNK2	1	50.9307	1	53.6245	1	1	1	1
ETS1	216.926	67.2435	72.5968	31.0062	328.581	1	1	1
ETS2	1	1	55.2155	1	1	150.825	307.589	203.3
ETV3	1	45.9895	1	1	1	1	58.2579	1
ETV4	1	81.959	93.981	147.073	1	1	1	1
EXTL1	1	61.5381	1	78.2112	1	1	1	1
EYA1	1	1	1	39.2645	1	1	1	1
F10	1	1	1	1	1	69.4147	1	1
F13A1	1	1	1	1	1	1	161.411	277.883
F2RL1	1	1	1	1	39.6517	1	1	1
FAAH2	1	1	1	1	97.0141	1	1	1
FABP3	1	1	1	1	1	1	1	81.5144
FABP7	1	1	1	73.7221	1	1	1	1
FAF1	1	1	1	52.4381	1	1	1	1
FAHD2B	1	102.276	76.3098	108.819	1	1	1	1
FAHD2CP	1	64.7306	54.7251	68.6042	1	1	1	1
FAIM3	329.676	108.652	128.173	1	406.239	1	1	1
FAM107B	117.883	1	1	1	147.073	1	1	1
FAM109B	1	1	1	62.5027	1	80.4875	1	1
FAM110A	95.0604	1	1	1	1	1	70.689	39.9336
FAM114A2	1	50.2392	45.7222	59.1952	1	1	1	1
FAM122B	1	1	1	40.5272	1	1	1	1
FAM134B	1	1	1	38.1473	1	1	1	1
FAM157A	1	1	1	1	1	1	82.9785	1
FAM157B	1	1	1	1	1	1	125.794	1
FAM167B	1	109.747	42.4924	96.7281	1	1	1	1
FAM171A1	1	1	1	1	1	75.1738	1	1
FAM174B	1	82.161	1	50.3304	1	1	1	1
FAM175B	1	38.347	1	1	1	1	1	1
FAM178B	1	49.5004	1	51.4311	1	1	1	1
FAM193B	1	1	47.2734	1	1	1	1	1
FAM20C	1	1	1	1	1	72.3387	1	77.3447
FAM215A	69.9084	1	1	1	1	1	1	1
FAM216A	1	1	1	55.6395	1	39.6459	1	1
FAM26F	1	1	1	1	1	1	410.755	384.515
FAM27A	1	57.3066	51.0252	45.842	1	1	1	1
FAM27C	1	1	1	30.8202	1	1	1	1
FAM46C	131.832	1	79.2234	1	249.79	1	1	1
FAM49A	1	1	1	1	1	51.6249	207.361	140.511
FAM86DP	1	44.7595	62.7873	78.5542	1	1	1	1
FAM91A2	53.4643	1	1	1	1	1	1	1
FANCA	52.5472	1	1	1	1	45.4315	1	1
FAP	1	1	1	48.9853	1	212.21	1	1
FAR2	1	44.4592	1	42.0305	1	1	1	1
FAS	112.299	1	1	1	115.115	134.161	1	1
FASLG	169.467	1	1	1	1	1	1	1
FASTKD3	1	1	66.4237	70.8857	1	1	1	1
FBLN2	1	1	1	1	1	378.475	1	1
FBLN5	1	1	1	41.2132	1	248.796	1	1
FBLN7	1	1	1	1	88.0412	1	1	1
FBN1	1	1	1	1	1	257.464	1	1
FBP1	1	1	1	1	1	1	352.439	122.44
FBXL2	1	43.3353	1	61.5503	1	1	1	1
FBXW4	68.9688	1	1	1	69.0239	1	1	1
FBXW9	1	1	1	54.9748	1	1	1	1
FCER1G	1	1	1	1	1	1	768.524	744.292
FCGBP	1	1	1	1	1	1	1	88.9232
FCGR1A	1	1	1	1	1	1	369.873	375.057
FCGR1B	1	1	1	1	1	1	157.185	181.152
FCGR1C	1	1	1	1	1	1	158.106	225.509
FCGR3A	1	1	1	1	1	1	410.824	628.126
FCGR3B	1	1	1	1	1	1	62.6182	45.0835
FCHO2	1	1	1	1	1	30.4671	55.6559	132.725
FCN1	1	1	1	1	1	1	604.347	93.7021
FCRL3	275.512	1	1	1	186.776	1	1	1
FCRL6	75.0131	1	1	1	1	1	1	1
FCRLA	1	65.753	84.6713	134.58	1	1	1	1
FDCSP	1	1	1	1	1	142.458	1	1
FDXR	1	59.2114	1	58.6773	1	1	1	1
FES	1	46.0645	1	1	1	1	190.541	143.716
FGD1	1	31.9675	1	1	1	1	1	1
FGD2	1	1	54.9759	1	1	1	309.087	276.049
FGD3	206.596	1	1	1	221.514	1	122.806	82.83
FGF7	1	1	1	1	1	272.77	1	1
FGFR1OP	1	1	51.732	1	1	33.9133	1	1
FGFRL1	1	1	35.665	1	1	1	1	1
FGGY	1	1	1	40.3271	1	1	1	1
FGR	1	1	1	1	1	1	443.055	163.287
FHIT	1	50.3415	1	46.0562	1	1	1	1
FHL1	1	1	1	1	1	257.6	1	1
FIGNL1	1	1	1	33.7801	1	1	1	1
FILIP1L	1	1	1	1	1	212.27	1	1
FKBP10	1	116.721	140.099	173.178	1	221.756	1	1
FLJ10038	47.869	1	1	1	52.113	1	31.2117	1
FLJ34208	1	1	1	1	1	1	67.4471	1
FLJ39051	1	55.38	1	1	1	1	1	1
FLJ41200	22.0876	1	1	1	1	1	1	1
FLNC	1	1	1	1	1	88.5472	1	1
FLRT2	1	1	1	1	1	142.067	1	1
FLT3LG	75.4351	1	1	1	115.477	40.0813	1	1
FLVCR2	1	1	1	1	1	1	132.01	117.076
FMO2	1	1	1	1	1	83.8657	1	1
FMOD	1	1	1	1	1	274.183	1	1
FNBP1L	1	71.8698	55.0108	76.2569	1	1	1	1
FNDC1	1	1	1	1	1	80.2563	1	1
FOLR2	1	1	1	1	1	1	1	448.971
FOSL1	1	1	1	1	1	109.56	1	1
FOXO1	97.8352	40.0153	62.3103	48.2368	176.596	1	1	1
FPR1	1	1	1	1	1	1	425.25	174.976
FPR2	1	1	1	1	1	1	220.221	1
FPR3	1	1	1	1	1	1	173.203	298.793
FREM2	1	1	1	37.14	1	1	1	1
FRZB	1	1	1	1	1	118.706	1	1
FSD1L	1	36.0795	1	1	1	1	1	1
FSTL3	1	1	56.6296	49.5029	1	72.366	1	1
FTLP10	35.8881	1	1	1	48.3447	1	1	1
FUK	1	1	1	35.5875	1	1	1	1
FXYD3	1	181.679	115.173	260.646	1	1	1	1
FXYD6	1	1	1	1	1	1	1	62.9766
G0S2	1	1	1	1	1	67.8277	227.603	1
GADD45A	1	48.9885	86.4359	74.5894	1	48.4984	1	1
GALNT3	1	37.806	1	1	1	1	1	1
GAPDHS	1	94.2731	1	1	1	1	1	1
GAPT	1	1	1	1	1	1	89.3702	40.6381
GAREM	1	1	1	33.6475	1	1	1	1
GATA3	111.744	1	1	1	126.854	1	1	1
GATM	1	1	1	1	1	1	1	183.11
GATSL3	1	73.3695	105.431	105.963	1	1	1	1
GBGT1	1	1	1	1	1	1	63.3592	88.4361
GCLC	1	1	1	1	1	1	1	43.1833
GCM1	31.3335	1	1	1	45.1173	1	1	1
GDF15	1	219.988	150.81	220.983	1	1	1	65.6358
GDPD5	1	37.4134	1	1	1	1	1	1
GFOD1	95.1995	1	1	1	75.7232	1	1	1
GFPT2	1	1	1	1	1	212.914	1	1
GFRA1	1	1	1	1	1	135.176	1	1
GGT5	1	1	1	1	1	288.48	1	1
GGTA1P	1	1	1	1	1	1	1	157.213
GIMAP1.GIMAP5	70.2493	1	1	1	1	1	1	43.9186
GIMAP6	228.384	1	1	1	145.18	1	98.9338	155.046
GIMAP7	437.279	1	92.7154	1	361.062	1	244.093	212.192
GJA1	1	1	1	1	1	180.825	1	1
GJB1	1	153.188	87.5213	212.369	1	1	1	1
GJC3	1	1	1	62.4824	1	1	1	1
GLCCI1	69.1436	1	1	1	81.5072	1	1	1
GLT8D2	1	1	1	1	1	143.846	1	1
GLTSCR1L	47.5287	1	1	1	1	1	1	1
GLUD2	1	1	1	64.217	1	1	1	1
GLYCTK	1	1	1	33.8238	1	1	1	1
GMPR	1	100.237	1	69.5667	1	1	1	1
GNA15	1	1	1	1	1	1	169.903	119.726
GNAQ	1	1	1	1	1	1	76.9413	1
GNB1L	1	1	1	38.0551	1	1	1	1
GNG11	1	1	60.1906	63.2742	1	212.543	1	1
GPATCH3	1	44.1212	1	43.2781	1	1	1	1
GPBAR1	1	1	1	1	1	1	112.552	1
GPC3	1	1	1	1	1	134.628	1	1
GPC6	1	1	1	1	1	92.0385	1	1
GPM6B	1	266.826	116.202	247.797	1	1	1	1
GPR114	46.7895	1	1	1	1	1	1	1
GPR133	1	1	1	1	1	116.305	1	1
GPR143	1	294.072	106.163	167.18	1	1	1	1
GPR171	215.92	1	1	1	173.987	1	1	1
GPR174	240.122	1	1	1	140.047	1	1	1
GPR176	1	1	1	1	1	126.717	1	1
GPR18	81.785	1	1	1	109.846	1	1	1
GPR34	1	1	1	1	1	1	71.8689	295.715
GPR35	1	1	1	1	1	1	90.0015	63.5903
GPR37	1	1	1	72.1062	1	1	1	1
GPR68	67.2472	1	1	1	1	1	1	1
GPR84	1	1	1	1	1	1	137.82	120.933
GPR89B	1	60.0183	1	41.0089	1	1	1	1
GPRIN3	198.943	1	1	1	152.987	1	67.3753	72.7653
GPX3	1	1	1	1	1	220.543	59.516	231.899
GRAP	64.8952	1	1	1	1	1	1	1
GRAP2	107.263	1	1	1	90.4893	1	1	1
GREM1	1	1	1	1	1	129.896	1	1
GRIA2	1	1	1	35.3626	1	1	1	1
GSDMB	61.6936	1	1	1	1	1	1	1
GSE1	60.5275	1	1	1	1	34.8402	1	1
GSTT2	1	1	1	51.2896	1	1	1	1
GSTT2B	1	1	1	52.8109	1	50.7352	1	1
GTF2A1	1	34.7665	1	1	1	1	1	1
GTF2H4	1	43.5739	1	54.3163	1	1	1	1
GTF2IRD2P1	25.5559	1	1	1	35.0059	1	1	1
GUCY1A3	1	1	1	1	1	80.1508	1	1
GUCY1B3	1	1	1	1	1	72.6454	1	1
GUSBP2	1	36.682	44.6271	38.2956	1	1	1	1
GYG2	1	128.043	44.1031	106.234	1	1	1	1
GZF1	1	1	1	1	1	1	49.4932	1
GZMA	525.754	1	1	1	194.609	1	1	1
GZMB	256.297	1	1	1	1	1	1	1
GZMH	242.365	1	1	1	1	1	1	1
GZMK	493.348	1	1	1	275.883	1	1	1
GZMM	187.641	1	1	1	195.197	1	1	1
H19	1	1	1	1	1	151.165	1	1
H1FX	1	1	1	1	1	36.4415	1	80.7168
HAGHL	1	87.1825	1	52.1348	1	1	1	1
HAMP	1	1	1	1	1	1	1	190.021
HAS1	1	1	1	1	1	136.172	1	1
HAS2	1	1	1	1	1	124.026	1	1
HBEGF	1	1	1	48.137	1	1	223.134	103.9
HCAR2	1	1	1	1	1	1	144.442	1
HCAR3	1	1	1	1	1	1	154.677	1
HCG25	38.1976	1	1	1	1	1	1	25.7903
HCK	1	1	1	1	1	1	457.067	296.712
HDAC10	1	1	1	1	1	1	1	59.6107
HDHD3	1	63.9485	49.71	56.5345	1	1	1	1
HEG1	1	1	1	1	1	126.485	1	1
HELB	73.5373	1	1	1	66.1963	1	1	1
HENMT1	72.7251	1	1	1	1	1	1	1
HEXIM2	1	46.8736	1	55.1395	1	1	1	1
HGF	1	1	1	1	1	83.5484	1	133.129
HHAT	1	35.8929	1	1	1	1	1	1
HHEX	1	1	1	1	1	1	1	38.9226
HHIP	1	1	1	1	1	70.4192	1	1
HID1	1	1	1	42.4897	1	1	1	1
HIF1A.AS2	1	1	1	1	1	1	1	40.7221
HIRA	1	1	1	1	1	1	1	53.5431
HIRIP3	1	53.8928	51.2996	49.3512	1	1	1	1
HIST1H1D	72.1972	1	1	1	1	1	74.0791	1
HIST1H2BC	1	57.6548	1	57.7215	1	1	1	1
HIST1H2BD	1	126.529	116.402	122.881	1	1	1	1
HIST2H2BF	1	1	1	1	1	1	79.2671	78.037
HIST2H4A	1	65.764	62.4136	46.0769	1	1	1	1
HIST2H4B	1	65.764	62.4136	46.0769	1	1	1	1
HIST3H2A	1	107.032	54.9943	83.5079	1	1	1	1
HK3	1	1	1	1	1	1	247.842	139.629
HKR1	1	53.7514	1	41.2776	1	1	1	1
HLA.DMB	88.0904	1	82.6997	1	1	1	573.46	589.267
HLA.DQB2	49.9909	1	1	1	1	1	266.437	320.857
HLX	1	1	1	1	1	1	47.1984	1
HMOX1	1	1	1	1	1	84.3645	154.72	239.172
HOPX	128.384	1	1	1	1	1	1	1
HOXC10	1	49.962	1	48.9876	1	1	1	1
HPGD	1	64.6505	51.4063	135.613	1	1	1	1
HRAS	1	1	1	39.7675	1	1	1	1
HRH1	1	1	1	1	29.2637	56.9909	1	1
HRH2	1	1	1	1	1	1	131.759	53.0465
HSD11B1	1	1	1	1	1	86.6708	1	1
HSD17B1	1	26.7169	1	1	1	1	1	1
HSD17B14	1	59.5609	1	1	1	1	1	117.253
HSD17B8	1	48.3485	1	45.8613	1	1	1	1
HSD3BP4	1	25.1783	1	1	1	1	1	1
HSF4	1	37.828	1	1	1	1	1	1
HSPA2	1	101.183	1	45.5895	1	59.8992	1	1
HSPA4L	1	1	1	47.227	1	1	1	1
HSPA6	81.6322	1	1	1	1	1	159.138	141.678
HSPA7	1	1	1	57.2447	1	1	144.412	152.017
HSPB2	1	1	1	1	1	98.1711	1	1
HSPB6	1	1	1	1	1	197.815	1	1
HTRA1	1	1	1	1	1	155.115	1	1
HTRA3	1	1	1	1	1	120.691	1	1
HVCN1	1	1	1	1	1	1	94.3332	146.376
ICA1	1	1	45.6807	50.1808	114.724	1	1	1
ICOS	169.818	1	1	1	258.143	1	1	1
ID1	1	1	1	1	1	120.911	1	1
IDI2.AS1	1	59.957	1	44.9538	1	1	1	1
IER5	1	1	1	1	1	1	1	51.0632
IFIT2	1	1	1	1	1	1	143.9	189.653
IFNG	280.365	1	1	1	90.6282	1	1	1
IFT43	1	90.2777	103.053	84.1094	1	110.379	1	1
IGF2	1	1	1	1	1	171.194	1	1
IGFBP3	1	1	72.7776	92.5318	1	218.531	1	1
IGFBP4	1	1	1	49.2897	1	333.196	1	1
IGFBP5	1	1	1	1	1	232.18	1	1
IGFBP6	1	1	1	1	1	315.74	1	1
IGHMBP2	1	45.5433	1	27.9615	1	1	1	1
IGLL5	1	1	101.228	1	1	1	1	77.0937
IGSF11	1	124.254	54.3863	136.96	1	1	1	1
IGSF3	1	155.366	73.7916	121.734	1	1	1	1
IGSF6	1	1	1	1	1	1	422.043	394.621
IKZF1	188.095	1	60.3345	1	250.477	1	60.0627	34.3954
IKZF2	49.0093	1	1	1	82.7532	1	1	1
IKZF5	1	39.3039	1	1	77.6394	40.1799	1	1
IL1A	1	1	1	1	1	1	48.5037	1
IL1B	1	1	1	1	1	1	431.298	94.2687
IL1R1	1	1	1	1	28.5586	111.082	1	1
IL1R2	1	1	1	1	1	1	96.3406	1
IL1RN	1	1	1	1	1	1	359.446	161.305
IL2RB	348.414	1	1	1	175.193	1	1	1
IL2RG	604.092	1	154.792	1	486.89	1	238.204	162.337
IL32	690.43	1	160.883	1	683.886	174.279	1	1
IL33	1	1	1	1	1	133.266	1	1
IL3RA	1	1	1	1	1	1	79.7995	1
IL4I1	1	1	1	1	1	1	268.689	372.101
IL6	1	1	1	1	1	94.9435	1	1
IL7R	152.249	1	117.134	1	507.109	28.2708	1	1
IL8	1	1	1	1	1	1	306.732	161.895
IMMP1L	1	50.1982	63.9986	85.5204	1	1	1	1
IMMP2L	1	102.307	81.7469	119.783	1	1	1	1
IMPG2	24.4579	1	1	1	29.334	1	1	1
INHBA	1	1	1	1	1	132.778	1	1
INHBE	1	1	1	1	32.4171	1	1	1
INO80C	1	1	1	51.8002	1	32.2931	1	1
INTS5	1	41.823	1	46.598	1	1	1	1
IPCEF1	167.546	1	56.2997	1	241.381	1	15.1069	12.4747
IQGAP2	85.4896	1	1	1	127.682	1	53.5105	110.194
IRF5	1	1	1	1	1	1	218.944	145.387
ISLR	1	1	1	1	1	396.73	1	1
ISLR2	26.1309	1	1	1	33.8607	1	1	1
ISYNA1	1	146.394	115.872	142.986	1	1	1	1
ITGA1	67.5381	1	1	1	1	66.4927	1	1
ITGA10	1	1	60.6483	140.458	1	1	1	1
ITGA11	1	1	1	1	1	140.558	1	1
ITGA3	1	90.7217	122.648	120.314	1	1	1	1
ITGA6	1	61.0021	65.9706	124.826	1	1	1	1
ITGAM	1	1	1	1	1	1	271.42	134.146
ITGAX	58.3024	1	55.243	1	1	1	401.183	303.019
ITGB2.AS1	161.499	1	1	1	188.658	1	81.9646	1
ITGB4	1	1	1	45.5026	1	1	1	1
ITGB7	144.569	1	1	1	94.4403	1	1	1
ITGBL1	1	1	1	1	1	110.93	1	1
ITIH6	1	1	1	71.106	1	1	1	1
ITK	259.729	1	1	1	336.162	1	1	1
ITM2A	467.236	1	1	1	402.718	131.508	1	1
JAKMIP1	104.61	1	1	1	1	1	1	1
JHDM1D	1	1	37.8994	1	1	1	60.74	1
JMY	1	1	1	1	51.8688	1	1	1
KAT8	1	1	1	1	1	1	59.1233	1
KBTBD7	1	1	1	1	1	104.72	1	1
KCNA3	96.1842	1	1	1	84.8053	1	1	1
KCNE1	1	1	1	1	1	1	53.4589	1
KCNJ13	1	60.7758	1	44.112	1	1	1	1
KCNJ2	1	1	1	1	1	1	80.2349	67.0362
KCNK5	70.9445	1	1	1	1	1	1	1
KCNMA1	1	1	1	1	1	1	59.9817	143.496
KCNMB1	1	1	1	1	1	1	106.559	1
KCNN4	1	63.89	114.201	138.994	1	1	104.883	1
KCP	23.7449	1	1	1	1	1	1	1
KCTD12	1	1	1	1	1	47.6796	183.001	213.391
KCTD6	1	1	1	54.6791	1	1	1	1
KDM5D	91.7457	43.1034	1	1	76.9264	1	1	1
KGFLP1	1	1	1	34.0217	1	1	1	1
KHNYN	1	34.3531	46.4394	1	1	51.6106	1	1
KIAA0232	1	1	32.3061	33.6374	1	1	1	1
KIAA0408	23.9945	1	1	1	33.4882	1	1	1
KIAA1211	1	30.2245	1	1	1	1	1	1
KIAA1586	1	35.676	46.6092	49.9006	1	1	1	1
KIAA1671	47.039	1	1	1	1	1	1	1
KIAA1683	1	1	1	1	81.585	1	51.5576	1
KIAA1704	1	47.2182	1	36.6347	1	1	1	1
KIAA1731	1	25.8364	1	1	1	1	1	1
KIF17	1	41.285	1	1	1	1	1	1
KIF20B	51.7013	1	1	1	66.9179	1	1	1
KIF21B	50.5889	1	1	1	1	1	1	1
KIF9	1	1	24.3124	38.8615	1	1	1	1
KIR2DL4	90.1834	1	1	1	1	1	1	1
KIT	1	114.264	1	1	1	1	1	1
KITLG	1	1	1	1	1	100.143	1	1
KLF12	107.975	1	41.0112	1	133.857	46.5135	1	1
KLF13	43.968	1	1	1	50.2821	1	1	1
KLF2	1	1	1	1	116.723	1	1	74.073
KLHDC4	58.6857	1	1	1	1	53.9217	1	1
KLHL11	1	39.9824	1	1	1	1	1	1
KLK10	26.0649	1	1	1	33.879	1	1	1
KLRB1	1	1	1	1	128.46	1	1	1
KLRC1	50.2698	1	1	1	1	1	1	1
KLRC2	110.62	1	1	1	1	1	1	1
KLRC3	147.943	1	1	1	1	1	1	1
KLRC4	206.461	1	1	1	102.569	1	1	1
KLRC4.KLRK1	114.866	1	1	1	1	1	1	1
KLRG1	119.065	1	1	1	108.199	1	30.7894	29.2065
KLRK1	499.319	1	67.243	1	297.691	1	1	1
KMO	1	1	1	1	1	1	36.6959	64.7335
KYNU	1	1	1	1	1	1	242.493	196.598
LACC1	1	1	1	1	1	38.8665	1	100.187
LACTB	1	1	1	1	1	1	103.762	97.451
LAG3	223.486	1	1	1	73.0313	1	1	1
LAMA1	1	34.8894	1	1	1	1	1	1
LAMA2	1	1	1	1	1	78.7868	1	1
LARGE	1	1	1	39.8113	1	1	1	1
LARP6	1	1	1	1	1	98.1033	1	1
LAT	307.586	1	78.1208	1	304.645	1	1	1
LAT2	1	1	1	1	1	1	260.211	287.229
LBH	369.218	1	93.9949	1	350.082	92.1262	1	1
LCK	512.355	1	89.8883	1	505.084	1	1	1
LDB2	1	1	1	1	1	76.8742	1	1
LDLRAD4	1	1	1	1	72.8662	1	35.7475	33.212
LEF1	1	89.2227	99.0712	128.647	187.424	1	1	1
LEMD2	1	34.4519	1	1	1	1	1	1
LEPREL2	1	1	1	1	1	90.7	1	1
LGALS2	1	1	1	1	1	1	202.886	1
LGALS9	127.975	1	63.6501	1	1	1	365.265	355.137
LGI4	1	1	1	58.6214	1	1	1	1
LHFPL3.AS1	1	165.199	1	90.9893	1	1	1	1
LIF	1	1	48.2191	47.5515	1	1	1	1
LILRA1	1	1	1	1	1	1	252.371	62.1503
LILRA2	1	1	1	1	1	1	195.782	141.558
LILRA3	1	1	1	1	1	1	160.568	76.8431
LILRA5	1	1	1	1	1	1	316.833	148.474
LILRB2	1	1	1	1	1	1	365.917	249.183
LILRB4	1	1	1	1	1	1	349.705	421.892
LILRB5	1	1	1	1	1	1	1	112.947
LIME1	221.152	1	69.8772	1	211.071	1	1	1
LIMS2	1	1	1	1	1	136.026	1	1
LINC00102	28.1909	1	1	1	37.3481	1	1	1
LINC00473	1	124.782	68.8408	86.8977	1	1	1	1
LINC00488	1	35.5624	1	1	1	1	1	1
LINC00511	1	39.2848	1	1	1	1	1	1
LINC00518	1	100.135	1	47.0188	1	1	1	1
LINC00589	1	45.8344	1	1	1	1	1	1
LINC00673	1	147.674	113.128	168.116	1	1	1	1
LINC00696	23.4536	1	1	1	31.2186	1	1	1
LINC00857	46.9583	1	1	1	49.8734	1	1	1
LIPN	1	1	1	1	1	1	62.8254	1
LIX1L	1	33.1948	1	1	1	1	1	1
LMO7	1	1	1	1	1	86.7293	1	1
LOC100126784	1	115.209	85.7259	109.132	1	1	1	1
LOC100127888	1	52.1636	59.1527	47.9604	1	1	1	1
LOC100128252	1	1	1	1	1	78.2955	1	1
LOC100129250	1	1	48.4645	1	1	1	1	1
LOC100130093	61.2875	1	1	38.3684	1	1	1	1
LOC100130231	238.19	1	69.3333	1	207.327	1	1	1
LOC100130357	1	1	1	1	1	1	52.7639	1
LOC100130370	1	80.2438	1	83.7728	1	1	1	1
LOC100130476	149.042	1	1	1	216.062	1	135.148	93.2143
LOC100130776	1	58.8508	1	41.1801	1	1	1	1
LOC100131234	1	1	1	1	1	1	79.4506	47.674
LOC100132356	45.994	1	1	1	1	48.3051	1	1
LOC100132707	1	40.3167	44.5016	35.3767	1	1	1	1
LOC100132891	1	1	1	1	1	79.7528	1	1
LOC100133161	1	1	1	1	1	1	44.1061	1
LOC100134368	29.7848	1	1	1	45.7882	1	24.7078	1
LOC100288432	1	1	1	1	1	1	69.5837	1
LOC100499405	1	1	1	44.0826	1	1	1	1
LOC100505738	1	1	1	30.9845	1	1	1	1
LOC100505865	1	115.438	69.7996	116.201	1	1	1	1
LOC100506054	1	1	1	37.8398	1	1	1	1
LOC100506233	1	52.0464	58.5607	50.5071	1	1	1	1
LOC100506451	1	1	46.1904	62.4252	1	1	1	1
LOC100506585	1	1	1	1	1	1	1	54.096
LOC100506844	1	47.0946	51.2191	54.6667	1	1	1	1
LOC146481	1	79.9063	1	73.8929	1	1	1	1
LOC154761	90.7272	1	56.7314	1	81.2173	1	1	1
LOC155060	1	48.1834	47.9763	52.8672	1	1	1	1
LOC158435	31.9415	1	1	1	38.313	1	1	1
LOC202181	1	45.6229	1	1	1	35.6191	1	1
LOC254128	1	1	47.5795	42.3733	1	1	1	1
LOC283070	1	1	1	1	1	1	1	42.9265
LOC283922	1	36.0817	1	1	1	1	1	1
LOC284757	35.0928	1	1	1	40.8041	1	1	1
LOC285074	65.3371	1	1	1	1	43.1412	1	1
LOC285740	1	1	1	1	85.7857	1	1	1
LOC286177	24.6518	1	1	1	32.2052	1	1	1
LOC338758	1	1	1	1	1	1	254.822	52.6355
LOC339535	1	1	1	48.3444	1	1	1	1
LOC340357	1	114.371	1	76.3979	1	1	1	1
LOC389634	1	1	1	1	1	1	49.3561	1
LOC400027	1	1	1	56.8059	1	1	1	1
LOC400043	1	1	1	1	1	87.3645	1	1
LOC401557	26.8988	1	1	1	28.2333	1	1	1
LOC440297	1	1	1	36.4219	1	1	1	1
LOC440896	30.8857	1	1	1	37.2417	1	1	1
LOC441601	1	1	1	38.9858	1	1	1	1
LOC553103	1	1	1	1	33.7289	1	1	1
LOC642361	42.0835	1	1	1	1	43.4021	1	1
LOC643733	78.0144	1	1	1	1	1	1	1
LOC645212	1	38.2737	48.7547	1	1	51.6886	1	1
LOC653786	1	1	1	1	1	1	1	66.7895
LOC728323	1	28.2256	1	1	1	1	1	1
LOC728875	1	1	52.4236	48.3608	1	1	1	1
LOC729683	45.3731	1	1	1	39.0097	1	1	1
LOC730101	1	1	1	46.2002	1	1	1	1
LOX	1	1	1	1	1	258.348	1	1
LOXL1	1	1	1	1	1	91.0458	1	1
LOXL2	1	1	61.8681	41.2575	1	194.106	1	1
LOXL4	1	130.446	88.7081	266.807	1	37.9486	1	1
LPAR1	1	1	1	1	1	261.159	1	1
LPAR2	1	1	1	1	95.3444	1	1	1
LPAR5	1	1	1	1	1	1	1	69.6905
LPL	1	1	1	100.534	1	1	1	75.8229
LRMP	128.95	1	1	1	162.406	1	94.5143	72.2832
LRR1	1	1	1	1	1	83.4225	1	1
LRRC32	1	1	1	1	1	161.967	1	1
LRRC37A	45.0442	1	1	1	57.7601	1	1	1
LRRC37A3	41.4866	1	1	1	58.289	1	1	1
LRRK2	1	1	1	1	1	1	111.055	38.7887
LST1	1	1	1	1	1	1	475.652	297.686
LTB	134.235	1	116.563	1	298.441	1	1	1
LTBP1	1	1	1	1	1	120.102	1	1
LTBP2	1	1	1	1	1	133.699	1	1
LUM	1	1	1	1	1	527.163	1	1
LURAP1L	1	1	1	1	1	88.5014	1	1
LUZP2	22.9413	1	1	1	27.6001	1	1	1
LXN	1	1	1	1	1	187.837	1	1
LY6K	1	52.9405	1	1	1	1	1	1
LY86	1	1	1	1	1	1	294.339	407.239
LY9	198.055	1	65.0094	1	158.094	1	1	1
LYN	1	1	1	1	1	1	284.834	209.593
LYSMD2	1	1	1	1	1	1	136.024	70.8791
MAFB	1	1	1	1	1	1	246.895	327.641
MAGEA1	1	1	44.533	75.4412	1	1	1	1
MAGEA12	1	67.6521	70.4443	116.268	1	1	1	1
MAGEA2	1	1	1	42.2147	1	1	1	1
MAGEA2B	1	47.8007	63.0608	89.7107	1	1	1	1
MAGEA3	1	78.1268	107.664	158.383	1	1	1	1
MAGEA4	1	1	65.3518	98.0641	1	1	1	1
MAGEA6	1	88.5859	113.879	155.794	1	1	1	1
MAGEC1	1	1	1	75.5337	1	1	1	1
MAGEC2	1	1	74.5342	174.212	1	1	1	1
MAGED4	1	1	1	1	1	87.0413	1	1
MAGED4B	1	1	1	1	1	111.978	1	1
MAL	1	1	1	1	126.99	1	1	1
MALT1	1	1	1	1	77.0365	1	1	1
MAN1A1	1	1	1	1	1	51.3931	1	98.1421
MAOB	1	1	44.6583	60.6435	1	1	1	1
MAP1A	1	1	1	1	1	104.576	1	1
MAP1B	1	55.2938	120.421	125.397	1	230.837	1	1
MAP2	1	1	1	43.5003	1	1	1	1
MAP2K4	1	1	1	1	1	1	1	36.3882
MAP3K14	68.5515	33.4665	49.0135	1	1	1	1	1
MAP4K1	267.187	1	54.5818	1	203.716	1	1	42.3308
MAP7D1	1	1	1	1	1	43.3	1	68.3964
MAPKAPK5	1	1	1	37.2141	1	1	1	1
MARCO	1	1	1	1	1	1	178.028	158.151
MARK2	47.167	1	1	1	1	1	1	1
MB21D1	58.2149	1	1	1	1	1	113.759	38.0611
MBD3	1	1	1	46.3314	1	1	1	1
MBLAC2	1	1	1	43.2813	1	1	1	1
MC1R	1	100.836	40.7389	52.2594	1	1	1	1
MCF2L	1	31.4991	1	1	1	1	1	1
MCTP1	1	1	1	1	1	1	107.146	69.4241
ME1	1	1	1	1	1	42.1423	1	92.2838
MED11	1	1	1	1	1	40.9014	1	113.017
MED9	1	1	1	48.1252	1	1	1	1
MEDAG	1	1	1	1	1	97.395	1	1
MEG3	20.4634	1	1	1	22.3188	295.771	1	1
MEIS3	1	1	1	1	1	65.815	1	1
MEOX2	1	1	1	1	1	134.529	1	1
MERTK	1	1	1	1	1	1	1	193.212
METRNL	1	1	1	1	1	53.9068	130.557	49.0753
METTL18	1	1	1	49.8629	1	1	1	1
METTL4	1	1	1	32.0575	1	1	1	1
METTL7B	1	1	52.5175	52.2544	1	1	1	73.8287
MFAP4	1	1	1	1	1	373.628	1	1
MFI2	1	92.9755	123.2	185.325	1	1	1	1
MFNG	143.399	1	1	1	155.62	1	82.1424	104.869
MGAT5	1	59.7681	63.4699	105.127	1	1	1	1
MGC16275	1	37.7607	1	1	1	1	1	1
MGP	1	1	100.244	205.427	1	349.646	1	1
MGST1	1	59.2729	1	1	1	233.476	54.9931	1
MIA	1	295.346	305.573	479.213	1	1	1	1
MIA.RAB4B	1	1	1	38.4675	1	1	1	1
MIAT	175.879	1	1	1	100.852	1	1	1
MID1	1	1	1	1	1	81.2052	1	1
MIR155HG	151.841	1	1	1	1	1	1	65.125
MIR22HG	1	1	1	1	1	99.0647	68.0924	1
MIR5047	70.8076	1	1	1	1	1	1	49.7637
MLLT11	1	1	1	75.1766	1	35.5933	1	1
MLLT3	116.096	1	1	1	103.43	84.6041	1	1
MMD	1	1	1	1	1	56.0789	1	98.9483
MMP1	1	1	1	1	1	104.346	1	1
MMP16	1	1	1	49.6294	1	1	1	1
MMP17	1	43.3864	1	1	1	1	1	1
MMP2	1	1	1	1	1	406.772	1	1
MMP8	1	1	1	54.158	1	1	1	1
MMP9	1	1	1	1	1	1	1	72.4996
MMRN2	24.4797	1	1	1	34.9779	1	1	1
MNDA	1	1	1	1	1	1	410.128	226.935
MOB2	1	1	1	52.6289	1	35.7409	1	1
MON1A	1	45.2948	1	1	1	1	1	1
MORC2.AS1	1	43.3277	1	42.2696	1	1	1	1
MOSPD1	1	55.9543	1	53.2278	1	1	1	1
MOSPD3	1	61.8297	58.1152	88.0107	1	1	1	1
MPEG1	1	1	1	1	1	1	397.243	292.878
MPHOSPH9	83.5751	1	1	1	1	1	1	40.1444
MPZ	1	60.7003	51.468	112.128	1	1	1	1
MRC1	1	1	1	1	1	1	163.609	198.246
MRC2	1	1	1	1	1	139.929	1	98.4514
MRGPRF	1	1	1	1	1	129.991	1	1
MRS2	1	61.7841	54.4918	94.0622	1	1	1	1
MS4A1	1	1	89.6884	1	1	1	1	1
MS4A14	1	1	1	1	1	1	74.6272	59.2298
MS4A4A	1	1	1	1	1	1	258.115	435.571
MS4A6A	1	1	1	1	1	1	517.17	603.373
MSANTD3	1	78.0302	1	37.6948	1	70.9578	1	1
MSC	1	1	1	1	1	176.965	1	1
MSR1	1	1	1	1	1	1	186.285	506.648
MST4	55.7694	1	1	1	72.9453	1	1	1
MSTO2P	1	43.6796	1	33.5602	1	1	1	1
MT1G	1	1	1	47.7341	1	1	1	1
MT1M	1	1	1	70.1158	1	81.1556	1	1
MTERF	1	40.1046	1	61.3302	1	1	1	1
MTERFD3	1	53.5371	1	1	1	58.7485	1	1
MTL5	25.646	1	1	1	31.7204	1	1	1
MTMR10	1	1	1	1	1	1	1	71.0606
MUC15	1	1	1	34.2017	1	1	1	1
MUTYH	1	53.0557	51.7085	51.7647	1	1	1	1
MVB12B	1	1	1	1	1	1	1	39.121
MVK	1	1	1	37.5768	1	1	1	1
MXRA5	1	1	1	1	1	184.109	1	1
MXRA8	1	1	1	1	1	352.742	1	1
MYADML	1	38.0693	1	1	1	1	1	1
MYL10	38.5901	1	1	1	1	1	1	1
MYL9	1	1	1	1	1	279.152	1	1
MYLK	1	1	1	1	1	121.873	1	1
MYO1G	176.641	1	1	1	114.67	1	143.154	74.4268
MYO7A	94.3652	1	1	41.3576	1	1	1	63.1651
NAPSB	1	1	1	1	1	1	180.849	129.412
NARS2	1	139.487	65.94	75.4845	1	48.0069	1	1
NBEA	1	1	30.3889	28.4696	1	1	1	1
NBEAL2	91.0387	1	1	1	85.7925	1	92.927	1
NCALD	75.1287	1	1	41.6325	1	73.2148	1	1
NCAM1	1	1	1	40.8981	1	1	1	1
NCCRP1	30.5427	1	1	1	39.6827	1	1	1
NCF1	1	1	83.5528	1	1	1	329.069	340.231
NCF1B	1	1	1	1	1	1	264.492	181.534
NCF1C	1	1	60.6128	1	1	1	258.738	313.823
NCF2	1	1	1	1	1	1	426.216	264.255
NCF4	1	1	1	1	1	1	199.004	216.167
NCK2	1	72.9296	56.9948	66.452	114.688	1	1	1
NDST2	1	1	1	1	1	1	73.1568	1
NDUFAF6	1	72.807	1	67.9969	1	1	1	1
NEGR1	1	1	1	1	1	73.7849	1	1
NELL1	1	1	1	55.8629	1	1	1	1
NELL2	139.534	1	1	1	138.23	1	1	1
NES	1	57.7397	48.6429	79.5704	1	1	1	1
NET1	1	1	51.5462	47.8184	1	84.7802	1	1
NEXN	1	1	1	1	1	117.469	1	1
NFATC4	1	1	1	1	1	72.0423	1	1
NFIB	1	1	1	43.5982	1	204.479	1	1
NFIL3	1	1	1	1	1	122.349	120.917	1
NFKB2	1	1	1	1	1	1	77.3838	1
NFKBID	1	1	1	1	77.7358	1	167.85	78.6521
NFKBIE	1	1	1	1	1	1	55.6767	1
NGFR	1	1	1	1	1	70.4632	1	1
NID2	1	1	1	1	1	197.181	1	1
NINJ2	1	1	1	1	1	64.563	1	72.6176
NKD1	25.3495	1	1	1	30.5539	1	1	1
NKG7	637.154	1	1	1	253.186	1	1	1
NLE1	1	1	1	50.9578	1	1	1	1
NLGN1	1	67.4663	1	67.3001	1	1	1	1
NME1.NME2	1	53.6931	49.4992	80.2834	1	1	1	1
NNMT	1	68.8292	181.064	176.756	1	478.203	1	1
NOD2	1	1	1	1	1	1	130.336	93.8262
NOP16	1	140.118	122.172	138.694	1	67.3904	1	1
NOTCH3	1	1	1	1	1	81.6731	1	1
NOV	1	99.251	1	59.0722	1	28.0979	1	1
NPHP1	1	1	1	33.9888	1	1	1	1
NPL	1	82.7534	1	50.2676	1	1	166.594	324.637
NR1H3	1	1	1	1	1	65.5811	1	156.36
NR2C2AP	1	57.384	59.6963	82.7006	1	1	1	1
NR2F6	1	50.6827	1	54.5699	1	1	1	1
NRBP2	1	59.3019	1	71.1836	1	1	1	1
NRCAM	1	1	1	43.1299	1	1	1	1
NRN1	1	43.0706	67.2918	81.1628	1	1	1	1
NRP1	1	1	1	1	1	273.471	104.681	296.179
NSFP1	101.482	1	1	1	92.4429	1	62.1026	1
NSG1	1	210.417	138.146	234.842	1	1	1	1
NT5DC2	1	49.8771	1	1	1	61.1379	1	1
NT5E	1	1	1	1	1	166.437	1	1
NTM	1	1	1	1	1	102.624	1	1
NTRK2	1	1	1	1	1	70.3236	1	1
NUDT8	1	61.7128	1	50.8714	1	1	1	1
NXT2	1	57.1766	48.4763	60.9416	1	1	1	1
OASL	196.28	1	1	1	1	1	155.992	64.8727
OCA2	1	63.3696	1	1	1	1	1	1
OGN	1	1	1	1	1	152.436	1	1
OLFML1	1	1	1	1	1	162.157	1	1
OLFML2B	1	1	1	1	1	239.186	1	205.976
OLFML3	1	1	1	78.5707	1	346.251	1	90.8813
OLR1	1	1	1	1	1	1	259.01	177.896
OMD	1	1	1	1	1	87.632	1	1
OPRK1	25.7019	1	1	1	30.0615	1	1	1
ORAOV1	1	1	35.7517	1	1	26.7467	1	1
OSBPL10	1	40.0923	46.5277	44.7533	1	1	1	1
OSBPL7	1	37.2042	1	1	1	1	1	1
OSCAR	1	1	1	1	1	1	167.544	130.896
OSM	1	1	1	1	1	1	93.7195	1
OSR1	1	1	1	1	1	90.069	1	1
OSR2	1	1	1	1	1	82.7133	1	1
OTOA	1	1	1	1	1	1	1	56.4787
OTUD1	1	1	1	1	1	1	58.5696	71.0559
OTUD7B	1	75.235	39.4309	44.0079	1	1	1	1
OXNAD1	141.509	49.227	65.0548	44.6015	202.687	1	1	1
OXSM	1	47.3752	1	71.6258	1	1	1	1
P2RX1	1	1	1	1	1	1	55.4909	1
P2RY10	166.788	1	1	1	228.451	1	1	1
P2RY11	1	1	1	1	1	1	1	80.0797
P2RY13	1	1	1	1	1	1	171.639	105.785
P2RY6	1	1	1	1	1	1	106.51	124.883
P2RY8	89.1752	1	1	1	137.378	1	37.1381	41.0887
PADI2	1	1	1	1	1	1	61.1542	1
PAEP	1	103.481	1	1	1	1	1	1
PAGE5	1	1	89.7409	89.0276	1	1	1	1
PAK4	1	26.2716	1	1	1	1	1	1
PALM	1	1	1	1	1	61.2119	1	1
PAMR1	1	1	1	1	1	96.1504	1	1
PAPSS2	1	1	1	1	1	153.002	1	38.0334
PAR5	1	1	1	34.9014	1	1	1	1
PARP15	148.532	1	1	1	168.49	1	1	28.5679
PARP16	1	1	1	44.4438	1	1	1	1
PARP8	205.574	1	54.8393	1	204.861	1	66.7966	59.6311
PASK	81.2184	1	1	1	121.219	1	1	1
PATL2	108.384	1	1	1	1	1	1	1
PAX3	1	179.999	83.5304	133.061	1	1	1	1
PBX4	1	1	1	1	93.5537	1	1	1
PC	1	52.9979	45.9732	55.633	1	1	1	1
PCDH18	1	1	1	1	1	134.309	1	1
PCDHB19P	20.4812	1	1	1	31.2341	1	1	1
PCDHGA12	1	55.6332	1	36.0901	1	1	1	1
PCED1B	227.661	1	1	1	147.159	1	1	69.9904
PCNXL2	68.1981	1	1	1	67.4194	1	1	1
PCOLCE	1	1	86.8134	83.8642	1	505.431	1	1
PCOLCE2	1	1	1	42.4762	1	134.628	1	1
PDCD1	391.018	1	1	1	238.289	1	1	1
PDCD1LG2	1	1	1	1	1	53.8452	1	103.825
PDE3B	100.355	33.4086	1	1	109.381	1	1	1
PDGFA	1	1	74.6506	95.5977	1	1	1	1
PDGFB	1	1	1	1	1	1	1	44.3918
PDGFC	1	1	1	1	1	51.9043	1	79.753
PDGFRA	1	1	1	1	1	251.15	1	1
PDGFRB	1	1	1	1	1	241.929	1	1
PDGFRL	1	1	1	1	1	224.287	1	1
PDLIM1	1	1	75.8942	1	1	266.579	1	1
PDPN	1	1	1	1	1	135.099	1	44.6
PFDN6	1	44.2608	1	41.7638	1	1	1	1
PGF	1	1	1	1	1	82.1986	1	1
PHF2	1	1	1	1	1	1	53.425	1
PHF23	1	43.4005	1	1	1	35.8024	1	1
PHLDB2	1	1	1	1	1	69.9112	1	1
PHLPP1	1	33.3495	1	1	1	1	1	1
PI16	1	1	1	1	1	164.177	1	1
PI4KAP1	1	36.6211	1	1	1	1	1	1
PID1	1	1	1	1	1	71.2417	140.672	1
PIGP	1	126.651	118.049	144.297	1	58.4586	1	1
PIH1D3	26.6689	1	1	1	1	1	1	1
PIK3AP1	64.2679	1	1	1	1	1	163.988	235.309
PIK3R3	1	41.9175	1	40.5778	1	1	1	1
PILRA	1	1	1	1	1	1	447.664	338.576
PINX1	1	57.0817	1	48.1985	1	1	1	1
PION	1	1	1	43.0334	1	1	156.404	179.885
PIR	1	241.018	77.879	189.17	1	24.235	1	1
PITPNA	1	1	1	37.4815	1	1	1	1
PITPNA.AS1	1	62.9508	1	53.5111	1	1	1	1
PITPNM1	61.1372	1	1	1	1	1	1	1
PKIB	1	1	1	1	1	1	1	77.4437
PKIG	1	103.469	152.105	184.607	1	166.131	1	1
PKNOX2	1	43.2428	1	34.3863	1	1	1	1
PLA1A	1	68.2849	1	58.7687	1	1	1	1
PLA2G2A	1	1	1	1	1	249.624	1	1
PLA2G7	1	1	1	1	1	1	116.813	135.822
PLAC9	1	1	1	1	1	246.602	1	1
PLAU	1	1	1	1	1	142.564	1	200.159
PLB1	1	1	1	1	1	1	59.2682	67.4565
PLCB1	1	1	36.8508	52.3652	1	1	1	1
PLCB4	1	1	1	30.9698	1	1	1	1
PLCD1	1	45.3702	1	1	1	69.719	1	1
PLCD3	1	1	1	1	30.4093	24.3125	1	1
PLCG2	1	1	1	1	1	1	70.7694	39.1791
PLD4	1	1	1	1	1	1	101.365	79.5913
PLEK	108.169	1	1	1	1	1	455.066	292.804
PLEKHB1	1	139.126	153.653	321.628	1	1	1	1
PLEKHF1	103.171	1	1	1	1	51.3628	1	1
PLEKHG1	1	1	27.8433	1	1	25.7909	1	1
PLEKHG3	1	49.4286	1	33.9153	1	1	1	1
PLEKHO1	1	1	1	1	1	56.4477	160.404	121.173
PLP1	1	304.182	162.182	337.404	1	1	1	1
PLSCR4	1	1	1	59.0305	1	127.521	1	1
PLXDC2	1	1	1	1	1	145.663	382.921	303.527
PLXNB1	1	33.1596	1	1	1	1	1	1
PMP2	1	1	1	33.8052	1	1	1	1
PMS2P4	1	61.9796	52.8033	60.6361	1	1	1	1
PODN	1	1	1	1	1	256.968	1	1
PODXL2	1	1	1	36.9741	1	1	1	1
POLG2	1	60.1255	53.1319	53.5829	1	1	1	1
POLL	1	46.1329	1	1	1	1	1	32.6137
POLR3B	1	1	1	32.9128	1	1	1	1
POLR3F	1	1	1	39.7373	1	1	1	1
POLR3G	1	51.5951	1	53.1494	1	1	1	1
POSTN	1	1	1	1	1	187.915	1	1
POTEF	1	1	1	39.7141	1	1	1	1
POU2F2	1	1	1	1	1	1	74.6754	73.7235
POU6F1	25.893	1	1	1	45.7521	1	1	1
PP7080	1	1	40.7438	1	1	57.5553	1	1
PPAP2B	1	1	1	36.8864	1	315.434	1	1
PPIC	1	1	1	66.6439	1	337.082	1	1
PPIL1	1	97.927	69.0701	113.381	1	1	1	1
PPL	1	1	58.4226	56.1584	1	1	1	1
PPM1H	1	59.1434	1	33.4881	1	1	1	1
PPOX	1	76.6882	57.8683	67.927	1	1	1	1
PPP1R16B	98.4715	1	1	1	95.3119	1	1	1
PPP1R9B	1	1	1	1	1	1	1	54.3682
PPP2R2B	77.6438	1	1	1	1	1	1	1
PPT2.EGFL8	1	41.6942	1	41.3372	1	1	1	1
PRAM1	1	1	1	1	1	1	186.963	71.0067
PRAME	1	342.948	212.019	377.095	1	1	1	56.1214
PRDM1	305.872	1	69.8097	1	286.446	1	132.512	111.313
PRF1	479.382	1	1	1	200.612	1	1	1
PRG4	1	1	1	1	1	99.0185	1	1
PRICKLE1	1	1	1	1	1	102.838	1	1
PRIM1	1	42.1607	1	53.5245	1	1	1	1
PRKAR1B	1	1	1	27.7689	1	1	1	1
PRKAR2B	1	1	1	38.2731	1	1	1	1
PRKCB	97.0079	1	1	1	116.372	1	70.0992	56.2207
PRKCDBP	1	122.724	172.814	229.693	1	279.352	1	1
PRKCH	419.798	1	67.0505	1	442.102	1	1	1
PRKCQ	133.281	1	1	1	146.088	1	1	1
PRKCQ.AS1	1	1	1	1	106.935	1	1	1
PRKD2	68.5804	1	1	1	1	1	1	1
PRKY	62.5277	1	1	1	38.2547	1	1	1
PROCR	1	1	1	1	1	184.011	1	1
PRPF19	1	1	1	32.9416	1	1	1	1
PRR16	1	1	1	1	1	75.5518	1	1
PRR24	1	1	1	1	1	87.4099	1	1
PRR26	1	62.6557	1	55.8726	1	1	1	1
PRR3	1	34.7143	1	1	1	1	1	1
PRR4	1	1	1	95.5003	1	1	1	1
PRR5L	78.7069	1	1	1	1	1	1	57.5213
PRRT3.AS1	1	1	1	56.9975	1	1	1	1
PRRX1	1	1	1	1	1	223.926	1	1
PRSS23	1	108.784	138.53	204.552	1	267.524	1	1
PRUNE	1	86.2298	49.5236	68.8659	1	1	1	1
PSAT1	1	96.969	47.5046	79.9155	1	1	1	1
PSD4	151.107	1	1	1	122.487	1	1	45.7348
PSEN2	1	132.702	77.2701	119.54	1	1	1	1
PSMD6.AS2	1	1	1	1	114.891	1	1	1
PSRC1	1	54.8465	1	52.9137	1	1	1	1
PSTPIP1	281.162	1	1	1	165.13	1	116.137	63.1494
PTCRA	1	1	1	1	1	1	1	55.7189
PTGDS	1	1	1	1	1	242.994	1	1
PTGER2	1	1	1	1	1	47.5878	123.241	1
PTGER4	212.805	1	62.1899	1	309.882	1	143.404	160.092
PTGS1	1	1	1	1	1	45.7268	115.4	170.546
PTN	1	1	1	1	1	111.418	1	1
PTP4A3	1	57.8412	1	1	1	1	1	1
PTPLA	1	90.9199	1	55.6672	1	60.4507	1	1
PTPN22	195.623	1	1	1	118.868	1	1	1
PTPN3	1	1	25.2237	1	1	1	1	1
PTPN4	68.842	1	1	1	55.7832	1	1	1
PTPN7	314.526	1	1	1	192.939	1	88.9633	1
PTPRCAP	703.521	90.394	185.718	1	640.249	1	1	1
PTPRO	1	1	1	1	1	1	47.218	67.115
PTPRZ1	1	40.7626	1	112.867	1	1	1	1
PTX3	1	1	1	1	1	86.9176	1	1
PUS7	1	43.6817	1	54.0731	1	1	1	1
PVRIG	315.928	1	67.3825	1	167.615	1	1	1
PXDN	1	1	1	1	1	201.095	1	1
PYHIN1	335.067	1	1	1	254.853	1	1	1
PYROXD2	1	33.1201	1	74.2623	1	1	1	1
RAB12	39.1287	1	1	1	1	1	1	98.797
RAB17	1	114.918	72.607	100.602	1	1	1	1
RAB20	1	1	1	1	1	1	235.599	279.708
RAB30	1	1	53.7467	1	1	43.1743	1	1
RAB31	1	1	48.9862	1	1	180.316	366.276	363.835
RAB37	143.135	1	1	1	66.858	1	1	1
RAB38	1	209.131	76.8612	153.665	1	1	1	1
RAB6B	1	45.0046	1	1	1	1	1	1
RAC3	1	50.4389	1	1	1	1	1	1
RAD17	1	59.2473	54.5413	85.6232	1	1	1	1
RAD51AP1	1	1	1	1	1	1	1	53.3244
RAD51C	1	108.896	100.371	119.924	1	49.2884	1	1
RAD52	1	46.6507	59.2898	59.1968	1	1	1	1
RALGPS2	1	41.8477	41.5557	1	1	22.771	1	1
RAMP1	1	1	53.5119	88.0503	1	1	1	1
RAMP2	1	1	1	1	1	67.896	1	1
RANBP17	1	29.8109	1	1	1	1	1	1
RAP1GAP	1	55.5344	1	38.8708	1	1	1	1
RAP2A	1	1	1	1	1	1	1	75.9815
RARRES1	1	1	1	1	1	156.693	1	1
RARRES2	1	1	1	1	1	373.649	1	1
RASAL3	148.806	1	1	1	152.753	1	1	1
RASGEF1B	1	1	1	1	1	1	137.094	142.524
RASGRP1	135.057	1	1	1	140.435	1	1	1
RASGRP2	1	1	1	1	96.7579	1	46.6039	1
RASGRP3	1	1	1	1	1	1	1	50.3771
RASSF4	1	1	1	1	1	1	320.881	345.234
RASSF5	290.922	1	60.8684	1	256.895	1	146.712	62.4077
RASSF7	73.8485	1	54.4536	1	1	1	1	1
RBM38	1	1	1	1	66.5641	1	1	1
RBM47	1	1	1	1	1	1	181.467	178.599
RBP7	1	1	1	1	1	1	66.5874	1
RBPMS	1	1	1	1	1	66.1096	1	1
RDH13	1	45.5767	1	46.48	1	1	1	1
RDH5	1	79.018	88.5094	86.9758	1	1	1	1
REC8	86.9243	1	1	1	1	1	1	1
REEP6	1	51.8147	1	1	1	1	1	1
RELT	1	1	1	1	1	1	128.461	95.6138
REM1	1	1	1	61.1617	1	1	1	1
RENBP	1	41.8913	1	1	1	1	1	1
RFC3	1	1	1	42.1822	1	1	1	1
RFFL	91.3257	1	1	1	1	1	1	1
RFTN2	1	1	1	55.808	1	1	1	1
RFX7	66.8084	31.0257	1	1	1	39.5125	1	1
RGCC	82.7793	1	1	1	144.853	1	81.6687	67.27
RGL4	66.0825	1	1	1	1	1	1	1
RGPD2	81.486	1	1	1	87.7874	1	1	1
RGS14	101.659	1	52.666	1	120.456	1	93.5852	1
RGS16	1	1	1	1	1	103.31	1	1
RGS18	1	1	1	1	1	1	171.115	42.1462
RGS20	1	113.588	50.7426	96.6927	1	1	1	1
RGS4	1	1	1	1	1	68.1258	1	1
RGS5	1	1	83.6783	93.2324	1	1	1	1
RHOH	308.443	1	99.5173	1	348.387	1	67.7262	1
RIN1	1	1	37.7386	1	1	46.5908	1	1
RIPK3	64.4576	1	1	1	1	1	1	54.6539
RIPK4	1	66.7376	1	57.3062	1	1	1	1
RLBP1	1	1	1	84.6504	1	1	1	1
RMRP	1	1	1	1	1	1	1	121.882
RNASE1	1	1	1	201.75	1	1	1	485.523
RNASE2	1	1	1	1	1	1	72.1449	78.7815
RNASE4	1	1	1	1	1	114.483	1	78.8985
RNASE6	1	1	1	1	1	1	267.723	460.24
RNF19B	1	1	1	1	1	1	76.3804	1
RNF43	1	29.1734	1	1	1	1	1	1
RNU12	1	1	1	1	1	1	77.1045	47.4591
ROGDI	1	1	1	1	1	1	77.5024	1
ROPN1	1	103.091	76.9165	137.068	1	1	1	1
ROPN1B	1	136.044	93.7875	175.414	1	1	1	1
ROR2	1	1	1	1	1	64.9171	1	1
RORA	1	1	1	1	84.1869	1	1	1
RP9P	1	1	1	41.4297	1	1	1	1
RPGR	1	37.7792	45.1062	46.1358	1	1	1	1
RPP40	1	1	1	50.1406	1	42.9575	1	1
RPPH1	1	1	1	1	1	1	95.6968	1
RPS6KA1	145.553	1	1	1	1	1	179.602	155.91
RRAGD	1	36.6961	1	1	1	1	1	1
RRAS	1	1	1	1	1	88.4175	1	1
RTBDN	31.8252	1	1	1	41.5319	1	1	1
RTKN	1	108.584	112.708	158.764	1	42.903	1	1
RTN1	1	1	1	1	1	1	68.6451	1
RTP4	1	84.348	73.0066	70.5828	1	1	1	1
RTTN	1	55.7768	1	1	1	1	1	1
RUNX1T1	1	1	1	1	1	88.6518	1	1
RXRA	1	1	1	1	1	1	68.5944	74.899
RXRG	1	1	1	102.593	1	1	1	1
S100A1	1	154.131	106.304	164.897	1	1	1	1
S100A12	1	1	1	1	1	1	195.323	1
S100A16	1	119.171	195.753	205.578	1	282.981	1	1
S100A8	1	1	1	1	1	1	510.683	97.2703
S100A9	1	1	1	1	1	1	650.991	395.605
S1PR1	1	1	64.7888	1	97.7816	1	1	1
S1PR4	1	1	1	1	1	1	64.6614	1
SAA1	1	1	97.2191	132.89	1	1	1	1
SAMD3	132.548	1	1	1	1	1	1	1
SARDH	98.9574	1	1	1	84.4254	1	1	1
SARM1	38.2156	1	1	1	34.5408	1	1	1
SCARA3	1	1	1	1	1	196.766	1	1
SCARA5	1	1	1	1	1	142.341	1	1
SCARNA17	89.6369	1	62.825	1	84.4745	1	1	1
SCARNA9	66.3297	1	1	1	1	1	91.3977	147.282
SCG3	26.4408	1	1	1	33.3425	1	1	1
SCIN	1	87.8814	1	1	1	1	1	69.9232
SCN1B	1	1	1	1	1	1	1	62.1684
SCN2B	22.2415	1	1	1	27.0418	1	1	1
SCUBE2	1	42.1941	1	56.1522	1	1	1	1
SCUBE3	1	1	1	1	1	73.3778	1	1
SDC1	1	1	1	1	1	78.5763	1	1
SDHAF1	1	70.5934	51.7732	74.8489	1	1	1	1
SDS	1	1	1	1	1	1	59.6661	139.17
SEC31B	78.8969	1	1	1	62.2393	1	1	1
SEL1L3	84.7228	1	47.2227	1	1	31.3293	1	1
SEMA3B	1	84.2881	104.583	226.421	1	1	1	1
SEMA3E	23.2792	1	1	1	1	1	1	1
SEMA4A	91.5449	1	1	1	1	1	200.64	116.502
SEMA4B	1	1	45.0819	1	1	1	1	1
SEMA4D	210.091	1	60.3282	1	260.053	1	161.132	63.143
SEMA6A	1	114.291	1	55.4033	1	1	1	1
2001-09-01	356.855	1	68.5574	1	301.036	1	1	1
2004-09-01	1	48.5198	1	66.2521	1	1	1	1
SERAC1	1	1	27.7084	1	1	1	1	30.9279
SERGEF	1	62.4424	83.0802	80.2359	1	24.1435	1	1
SERPINA1	1	69.4459	85.7467	97.9113	1	1	629.836	331.36
SERPINA3	1	149.37	262.431	360.368	1	1	1	1
SERPINA5	1	1	1	104.531	1	1	1	1
SERPINE1	1	1	101.289	51.5296	1	197.777	1	1
SERPINE2	1	396.577	385.753	574.377	1	279.101	1	53.2828
SERPINI1	1	57.4621	58.8935	100.279	1	1	1	1
SETBP1	1	1	46.3728	22.4175	1	71.2674	1	1
SETD1B	49.3624	28.7893	1	1	51.6567	1	1	1
SETD4	1	55.4655	56.0438	70.3824	1	1	1	1
SETD6	1	35.6797	1	1	1	1	1	1
SETD9	1	44.6017	1	46.9239	1	1	1	1
SFRP1	1	1	66.8318	111.129	1	1	1	1
SFRP2	1	1	1	1	1	246.932	1	1
SFRP4	1	1	1	1	1	229.984	1	1
SGCD	1	126.928	56.8845	99.4667	1	1	1	1
SGPP1	1	1	1	1	1	1	1	58.5593
SH2D1A	283.361	1	1	1	245.702	1	1	1
SH2D2A	255.234	1	1	1	194.026	1	1	1
SH2D3C	128.143	1	1	1	1	1	95.2581	1
SH3BGR	1	1	1	44.5732	1	1	1	1
SH3BP4	1	55.7989	1	1	1	57.6929	1	1
SH3D19	1	1	1	37.8032	1	121.655	1	1
SH3D21	1	52.7532	1	1	1	1	1	1
SH3RF1	1	1	1	1	1	83.0589	1	1
SH3TC2	1	1	31.5912	58.9459	1	1	1	1
SHC4	1	109.72	71.8206	114.001	1	1	1	1
SIDT1	101.426	1	1	1	103.061	1	1	1
SIGLEC1	1	1	1	1	1	1	155.772	192.37
SIGLEC14	34.4631	1	49.2133	1	1	1	394.89	189.089
SIGLEC5	1	1	1	1	1	1	48.7863	1
SIGLEC7	1	1	1	1	1	1	116.599	146.452
SIGLEC9	1	1	1	1	1	1	189.796	195.194
SIK3	1	1	1	1	1	1	58.1724	1
SIRPB1	1	1	1	1	1	1	266.108	122.278
SIRPG	388.457	1	1	1	278.854	1	1	1
SIRT6	1	1	1	31.3132	1	1	1	1
SIT1	331.754	1	1	1	185.47	1	1	1
SKAP1	293.706	1	61.5629	1	287.284	1	1	1
SLA	442.601	1	104.83	1	492.722	1	250.29	314.987
SLAMF1	94.6618	1	1	1	89.9952	1	1	1
SLAMF8	1	1	1	1	1	1	212.796	195.808
SLC11A1	1	1	1	1	1	1	326.999	187.482
SLC12A4	1	1	1	1	1	90.6828	1	1
SLC12A9	1	1	1	1	1	1	1	39.5533
SLC13A3	1	42.9019	1	57.2757	1	1	1	1
SLC15A3	1	1	1	1	1	1	109.286	229.91
SLC16A5	1	1	1	44.2108	1	1	1	1
SLC16A6	1	1	1	1	1	1	54.2824	1
SLC1A3	1	1	1	1	1	45.9186	108.847	270.053
SLC22A3	1	1	1	1	1	104.072	1	1
SLC22A9	1	1	1	1	33.0394	1	1	1
SLC24A5	1	196.749	58.962	164.507	1	1	1	1
SLC25A14	1	1	1	47.752	1	1	1	1
SLC25A27	1	1	1	31.4998	1	1	1	1
SLC29A3	1	1	1	1	1	1	58.9855	124.573
SLC2A5	1	1	1	1	1	1	63.1246	263.219
SLC2A8	1	1	1	1	1	1	1	66.9784
SLC2A9	1	1	1	1	1	1	1	72.3763
SLC31A2	1	1	1	37.132	1	96.1405	304.706	265.79
SLC35F2	50.6886	1	1	1	1	80.4156	1	1
SLC38A1	303.177	1	108.537	45.2429	383.362	28.768	1	1
SLC38A5	1	1	1	1	1	72.4464	1	1
SLC39A4	1	76.7719	63.9187	63.3175	1	1	1	1
SLC40A1	1	1	1	1	1	84.3549	58.3973	236.859
SLC43A2	1	1	1	1	1	32.3755	220.062	113.013
SLC45A2	1	215.557	47.0795	105.389	1	1	1	1
SLC46A3	1	1	1	1	1	1	1	102.197
SLC6A15	1	110.303	61.829	109.188	1	1	1	1
SLC7A5P1	1	61.7357	1	1	1	1	1	1
SLC7A6OS	1	56.7396	59.5983	54.7455	1	1	1	1
SLC7A7	1	1	1	1	1	1	329.985	314.353
SLC8A1	1	1	1	1	1	41.0685	127.073	97.9751
SLC9A7P1	1	1	1	1	1	1	34.8159	1
SLCO2B1	1	1	1	1	1	1	115.823	388.5
SLCO3A1	1	1	1	1	1	1	44.5019	1
SLCO4A1	1	42.2072	74.0527	67.919	1	1	1	1
SLFN12L	74.8949	1	1	1	1	1	1	1
SLIT2	1	1	1	1	1	98.0793	1	1
SLIT3	1	1	1	1	1	148.722	1	1
SMG8	1	46.5673	1	40.4203	1	1	1	1
SMOC2	1	1	1	1	1	175.926	1	1
SMOX	1	1	55.2567	55.0462	1	1	1	1
SMPD2	1	52.4903	1	1	1	1	1	1
SNAI2	1	121.072	1	61.8341	1	234.502	1	1
SNHG9	1	55.0095	62.5204	69.8859	1	1	1	1
SNORA61	1	1	1	1	1	1	1	51.2521
SNORA70	1	1	1	1	1	1	82.8924	95.6576
SNORD47	1	59.7735	1	1	1	1	1	101.068
SOCS1	1	1	1	1	83.8591	1	1	1
SORCS1	1	1	1	55.2572	1	1	1	1
SOX10	1	170.749	107.932	177.134	1	1	1	1
SOX13	1	64.0544	63.6785	89.9891	1	1	1	1
SOX8	1	1	1	56.3785	1	1	1	1
SP140	221.972	1	63.4114	1	185.213	1	1	1
SPARCL1	1	1	1	85.3932	1	115.448	1	1
SPATA7	1	1	1	1	1	1	1	49.2685
SPDYE3	35.0802	1	1	1	1	1	1	1
SPESP1	1	48.6617	1	1	1	1	1	1
SPI1	1	1	1	1	1	1	183.796	152.531
SPINT1	1	1	1	1	1	1	1	51.3238
SPINT2	1	1	1	1	1	1	166.551	273.343
SPOCK1	1	1	1	1	1	199.94	1	1
SPOCK2	229.291	1	56.2437	1	339.444	1	1	1
SPON1	1	1	1	1	1	139.111	1	1
SPON2	1	135.062	131.716	149.918	1	186.847	1	1
SPRTN	1	44.6152	1	55.3834	1	1	1	1
SPSB2	1	1	1	39.8329	1	1	1	1
SRGAP2B	1	1	1	1	1	1	76.8054	1
SRPX2	1	1	1	1	1	130.17	1	1
SRRD	1	38.263	1	1	1	1	1	1
SSTR5.AS1	25.6103	1	1	1	31.2176	1	1	1
ST14	1	1	1	1	1	1	1	62.3785
ST3GAL4	1	267.407	151.93	260.225	1	84.7472	1	1
ST3GAL6.AS1	1	57.9032	1	53.8421	1	1	1	1
ST6GALNAC2	1	144.357	76.4952	115.881	1	1	1	1
ST6GALNAC3	1	68.0174	1	36.5751	1	1	1	1
ST6GALNAC4	1	1	1	1	1	74.1398	1	1
ST6GALNAC5	1	1	1	35.4849	1	1	1	1
ST6GALNAC6	166.234	1	1	1	150.187	85.2255	1	1
STAB1	1	1	1	1	1	1	146.791	246.549
STARD10	1	58.8039	1	1	1	1	1	1
STAT4	189.561	1	1	1	235.819	1	1	1
STC2	1	1	1	1	1	97.3515	1	1
STEAP1	1	45.1507	1	1	1	136.108	1	1
STIL	29.4246	1	1	1	31.7384	1	1	1
STIM2	1	1	37.3296	40.6611	1	1	1	1
STK32A	1	135.684	1	122.708	1	1	1	1
STK38L	1	1	1	1	1	29.0339	108.508	63.1344
STL	1	1	1	1	28.259	1	1	1
STOML1	1	1	1	61.9835	1	53.0272	1	1
STXBP1	1	253.971	136.029	207.254	1	63.0898	1	1
STXBP4	1	29.6856	1	1	1	1	1	1
SULF1	1	1	1	1	1	210.463	1	1
SULF2	1	1	1	1	1	116.515	106.053	1
SULT1C2	1	31.1543	1	1	1	1	1	1
SUPT3H	1	1	35.3525	1	1	1	1	1
SURF2	1	75.4077	53.8233	1	1	1	1	1
SUSD3	130.747	1	1	1	120.158	1	1	1
SVEP1	1	1	1	1	1	171.436	1	1
SYNM	1	1	49.8025	78.9579	1	1	1	1
SYTL1	114.714	1	1	1	117.729	1	1	1
SYTL2	100.649	80.0811	1	1	1	1	1	1
SYTL3	229.317	1	1	1	232.536	1	70.1126	1
TACC3	103.725	1	1	1	104.472	1	39.406	1
TADA1	1	67.8487	58.2438	57.4203	1	1	1	1
TAF10	1	1	1	38.2369	1	1	1	1
TAF5L	86.6308	1	1	1	66.3754	28.8504	1	1
TAGAP	268.774	1	97.993	1	400.812	1	250.951	108.238
TAGLN	1	1	1	1	1	398.224	1	1
TANGO6	1	43.9065	1	29.9037	1	1	1	1
TARP	213.641	1	1	1	132.432	1	1	1
TARSL2	1	1	38.4403	35.1639	1	1	1	1
TBC1D10C	359.584	1	94.4476	1	343.691	1	80.3655	1
TBC1D12	1	1	1	1	1	1	1	54.6623
TBC1D19	1	1	48.0314	44.4728	1	63.015	1	1
TBC1D4	134.004	1	53.4015	76.2454	168.653	1	1	1
TBPL1	1	1	71.2924	50.2566	1	84.7337	1	1
TBX15	1	1	1	1	1	93.7503	1	1
TBXAS1	1	1	1	1	1	1	326.402	327.724
TC2N	193.559	1	47.7065	1	213.324	1	1	1
TCEA3	1	1	1	1	1	90.5236	1	1
TCEAL7	1	1	1	1	1	66.1168	1	1
TCN1	1	1	70.633	78.7315	1	1	1	1
TDP1	67.3682	1	1	1	67.0107	1	1	1
TDRD7	1	48.0786	1	1	1	1	1	1
TDRKH	1	1	1	52.3195	1	1	1	1
TEAD3	1	1	1	1	1	87.0645	1	1
TEF	1	1	1	1	1	73.1437	1	1
TENM1	1	1	1	1	54.523	1	1	1
TESC	1	1	1	81.0402	1	1	1	1
TESK1	1	1	1	1	1	47.6296	1	77.7546
TESK2	1	32.1711	1	1	1	1	1	1
TESPA1	148.835	1	47.4979	1	189.334	1	22.0907	1
TF	1	1	107.576	146.46	1	1	1	1
TFAP2A	1	160.402	59.1101	100.449	1	1	1	30.9637
TFAP2C	1	1	61.3603	116.501	1	1	1	1
TFCP2	1	37.7827	1	1	1	25.1783	1	1
TFEB	1	1	1	1	1	1	47.7705	68.6353
TFEC	1	1	1	1	1	1	96.7523	74.4066
TFF2	1	1	1	46.9582	1	1	1	1
TFPI	1	1	1	1	1	261.464	1	1
TGFB1I1	1	52.0186	1	48.3251	1	244.456	1	1
TGFB3	1	1	1	1	1	109.49	1	1
THAP2	1	1	1	1	1	1	34.8562	1
THAP7.AS1	1	44.2005	42.8557	1	1	1	1	1
THBS2	1	1	1	1	1	335.186	1	1
THBS3	1	1	1	1	1	102.321	1	1
THEMIS	186.107	1	1	1	150.372	1	1	1
THY1	1	1	1	1	1	400.285	1	1
TIGIT	405.986	1	1	1	325.124	1	1	1
TIMP3	1	202.807	176.264	243.908	1	260.14	1	1
TK1	1	1	1	60.5969	1	86.1236	1	1
TLR1	1	1	1	1	1	1	152.619	165.517
TLR2	1	1	1	1	1	1	347.076	301.3
TLR4	1	1	1	1	1	1	195.938	214.93
TLR5	1	1	1	1	1	1	57.6599	109.601
TLR8	1	1	1	1	1	1	115.645	104.567
TM4SF1	1	131.048	212.208	226.644	1	105.005	1	1
TM6SF1	1	1	1	1	1	1	119.084	158.707
TMC8	213.955	1	59.233	1	265.219	1	1	45.8516
TMCO4	1	1	46.187	48.4423	1	1	1	1
TMED8	1	36.9716	1	1	1	1	1	1
TMEM117	1	50.5677	1	1	1	1	1	1
TMEM144	1	1	1	1	1	1	35.2367	111.242
TMEM161B	1	67.5239	69.9054	54.1198	1	1	1	1
TMEM176A	1	1	1	1	1	241.123	272.99	401.106
TMEM176B	1	1	1	1	1	225.97	433.832	447.868
TMEM177	1	91.2378	43.8149	94.5019	1	1	1	1
TMEM185A	1	43.69	1	46.1359	1	1	1	1
TMEM187	1	1	1	54.7085	1	1	1	51.7283
TMEM189.UBE2V1	1	35.3205	1	1	1	1	1	1
TMEM194B	1	39.8608	1	1	1	1	1	1
TMEM204	1	1	1	1	1	77.4645	1	1
TMEM206	1	78.06	1	53.0635	1	1	1	43.7688
TMEM229B	1	1	1	42.6086	1	1	1	1
TMEM234	1	58.3883	48.0565	1	1	35.9636	1	1
TMEM246	1	42.8928	1	1	1	1	1	1
TMEM37	1	1	1	1	1	1	1	116.428
TMEM47	1	1	1	1	1	101.5	1	1
TMEM51	1	51.5539	1	39.0398	1	1	1	188.157
TMEM55B	1	1	1	1	1	1	1	30.6435
TMEM79	1	36.2106	1	1	1	1	1	1
TMEM86A	1	1	1	1	1	1	1	108.305
TMEM91	1	1	1	1	1	61.3982	1	71.2997
TMPPE	1	1	1	1	1	1	1	44.2296
TMTC2	1	1	29.5341	52.521	1	1	1	1
TNF	1	1	1	1	1	1	107.177	148.636
TNFAIP2	1	1	1	1	1	148.714	261.356	267.197
TNFAIP8L2	1	1	1	1	1	1	165.651	115.397
TNFRSF10A	76.0057	1	46.8684	1	76.7256	1	1	1
TNFRSF10C	1	1	1	1	1	1	45.5736	1
TNFRSF11B	1	1	1	1	1	87.5506	1	1
TNFRSF19	1	65.4619	50.3708	111.31	1	1	1	1
TNFRSF25	69.8184	1	1	1	138.609	1	1	1
TNFRSF6B	1	1	1	1	1	97.1409	1	1
TNFSF12	1	1	1	1	1	1	42.191	109.876
TNFSF13	1	1	1	1	1	1	322.07	372.638
TNFSF13B	1	1	1	47.1208	1	144.578	359.874	284.178
TNFSF4	1	50.7132	61.9176	90.4479	1	1	1	1
TNFSF8	111.581	1	1	1	273.611	1	53.5902	36.9433
TNFSF9	56.1274	1	1	1	1	1	1	1
TNXB	1	1	1	1	1	170.496	1	1
TOM1L1	1	92.7391	52.8401	111.3	1	1	1	1
TOR2A	1	1	1	1	1	1	111.432	85.0463
TOX	285.015	1	1	1	224.387	1	1	1
TOX2	69.2704	1	1	1	1	1	1	1
TP53I11	1	1	1	1	1	143.161	1	1
TP53TG3C	1	1	1	43.7968	1	1	1	1
TPBG	1	1	1	1	1	189.474	1	1
TPD52	1	91.3725	94.3429	112.235	1	1	1	48.4608
TPD52L1	1	1	1	84.3364	1	46.5075	1	1
TPM2	1	1	1	1	1	264.651	1	1
TPPP3	1	1	1	1	1	126.771	1	1
TPRG1L	1	1	35.4255	1	1	39.5339	1	1
TRAF1	157.2	1	54.8329	1	129.021	1	76.4236	1
TRAF3	51.2438	1	1	1	1	1	1	31.5357
TRAF3IP3	321.868	1	108.043	1	296.629	1	118.509	66.1431
TRANK1	101.347	1	1	1	62.5388	1	1	1
TRAT1	255.003	1	1	1	289.967	1	1	1
TREM1	1	1	1	1	1	1	359.509	106.561
TREM2	1	1	1	1	1	1	105.305	404.329
TRERF1	114.484	1	1	1	131.536	32.4153	1	1
TRIB3	1	41.7563	1	74.1111	1	1	1	1
TRIM11	1	38.5708	1	1	1	1	1	1
TRIM47	1	52.8281	66.2906	63.0527	1	1	1	1
TRIM51	1	1	1	61.6799	1	1	1	1
TRIM63	1	132.985	1	1	1	1	1	1
TRIM72	38.1813	1	32.7231	1	52.7418	1	1	1
TRIM9	1	1	40.3323	66.6673	1	1	1	1
TRIML2	1	62.9682	89.46	90.2481	1	1	1	1
TRIO	1	1	1	1	1	72.9387	1	1
TRIT1	1	50.1753	46.7397	42.1508	1	1	1	1
TRMT12	1	54.47	1	42.4943	1	1	1	1
TRMT61B	1	61.7157	57.7915	71.3858	1	1	1	1
TRPM1	1	114.116	1	1	1	1	1	31.6232
TRPM2	1	1	1	45.1188	1	1	59.424	117.837
TSC22D1.AS1	23.0826	1	1	1	1	1	1	1
TSPAN10	1	47.0499	1	1	1	1	1	1
TSPAN13	1	1	81.37	88.7842	1	1	1	1
TSPAN15	1	1	1	1	1	1	1	68.5339
TSPAN32	59.4337	1	1	1	1	1	47.7296	1
TSPAN5	66.7559	1	1	1	1	31.8857	1	1
TSPAN7	1	119.872	59.1065	175.361	1	1	1	1
TTC24	66.2623	1	1	1	1	1	1	1
TTC39A	1	85.5544	1	1	1	1	1	1
TTC39B	72.7991	1	1	1	62.4402	1	1	1
TTLL1	1	61.4831	1	51.7818	1	1	1	1
TTN	134.76	22.9254	33.0124	1	116.036	1	1	1
TTN.AS1	1	53.0374	1	1	1	1	41.0553	1
TUBA4A	246.406	1	80.3464	1	290.431	1	51.9335	1
TUBB4A	1	147.674	1	67.4865	1	1	1	1
TXK	73.9886	1	1	1	207.585	1	1	1
TXLNG	1	49.2341	48.8344	52.843	1	1	1	1
TXLNG2P	71.7054	36.3949	1	1	68.0487	1	1	1
TYR	1	435.694	216.877	357.799	1	1	1	87.6916
TYROBP	1	1	1	1	1	1	816.744	780.424
TYRP1	1	112.971	1	1	1	1	1	1
TYW1B	1	1	1	52.1281	1	1	1	1
UBASH3A	172.236	1	1	1	108.271	1	1	1
UBD	1	1	1	1	1	132.113	1	119.78
UBE2Q1	1	1	1	1	1	1	1	68.5797
UBR3	1	1	35.0151	24.5642	1	1	1	1
UCHL1	1	1	1	1	1	92.6137	1	1
UCN2	1	48.9257	59.3956	55.7043	1	1	1	1
ULK4	1	34.0534	1	1	1	1	1	1
UNC13B	1	39.767	1	1	1	20.691	1	1
UNC93B1	1	1	1	1	1	1	110.615	112.213
UPK3B	40.1235	1	1	1	1	1	1	1
USP30	1	40.6694	1	51.3799	1	1	1	1
USP9Y	57.0135	1	1	1	53.2642	1	1	1
UTP14A	1	64.4555	52.5445	64.2932	1	1	1	1
VANGL2	1	28.9554	1	1	1	1	1	1
VASH1	1	1	1	1	1	1	79.264	46.9739
VASN	1	1	41.9987	1	1	190.617	1	1
VASP	1	1	1	1	1	1	81.9205	44.9723
VCAM1	140.555	1	1	1	1	164.326	1	1
VCAN	1	1	1	1	1	355.391	407.439	97.6004
VEPH1	1	77.1825	1	1	1	45.7928	1	1
VIT	1	1	1	1	1	103.008	1	1
VLDLR	1	57.0359	1	46.2258	1	1	1	1
VMO1	1	1	1	1	1	1	1	184.254
VPS37C	1	1	1	1	1	1	1	52.6348
VSIG4	1	1	1	1	1	1	300.206	411.096
VSTM1	1	1	1	1	1	1	65.1137	1
WASH3P	37.8191	1	1	1	1	1	1	27.8897
WDFY4	1	1	1	1	1	1	36.2734	67.7689
WDR37	1	1	1	1	64.3598	19.898	1	25.8485
WDR4	1	51.8192	1	69.4141	1	1	1	1
WDR59	1	1	1	36.1637	1	1	1	1
WDR83	1	1	1	39.2301	1	1	1	1
WISP2	1	1	1	1	1	169.008	1	1
WNK3	1	24.427	1	1	1	1	1	1
WRNIP1	1	1	1	35.9414	1	1	1	1
XAGE1A	1	69.9264	135.066	163.83	1	1	1	1
XAGE1B	1	69.4024	134.599	163.399	1	1	1	1
XAGE1C	1	69.5391	136.303	163.105	1	1	1	1
XAGE1D	1	69.6127	135.232	162.889	1	1	1	1
XAGE1E	1	69.6438	135.316	163.773	1	1	1	1
XCL1	75.9057	1	1	1	1	1	1	1
XCL2	103.26	1	1	1	93.167	1	1	1
XPNPEP2	1	1	1	1	1	104.709	1	1
XYLB	1	77.3463	42.9354	65.8436	1	1	1	1
YPEL3	1	1	57.9887	52.0474	1	1	1	39.9545
ZAP70	399.341	1	68.1684	1	419.052	1	1	1
ZBED2	103.57	1	1	1	82.1263	1	1	1
ZBTB16	1	1	1	1	103.154	118.866	165.025	1
ZBTB25	72.3585	1	1	1	87.3771	25.305	1	1
ZBTB9	1	40.9574	1	1	1	1	1	1
ZC3H12C	1	25.6188	1	1	1	1	1	1
ZC3HC1	1	76.0496	69.6682	95.5108	1	1	1	1
ZDBF2	22.5498	1	1	1	39.2809	1	1	1
ZDHHC13	1	1	43.7912	41.7461	1	1	1	1
ZDHHC15	30.1476	1	27.2774	1	44.4156	1	1	1
ZDHHC2	1	1	1	1	1	1	1	87.7672
ZEB1	61.6855	1	1	1	61.2641	123.111	1	1
ZFHX4	1	1	1	1	1	69.1514	1	1
ZFP62	1	1	40.4132	1	1	1	1	1
ZFR2	21.6432	1	1	1	28.4856	1	1	1
ZFYVE28	55.9611	1	1	1	1	1	1	1
ZG16	38.6083	1	1	1	45.6244	1	1	1
ZHX2	52.7221	1	49.0954	1	1	66.8133	1	1
ZMYM1	1	37.8911	1	1	1	1	1	1
ZNF101	88.1808	1	1	1	90.9142	1	1	1
ZNF107	61.1317	1	42.3358	1	76.3275	1	1	1
ZNF12	1	1	1	38.2879	1	1	1	1
ZNF134	1	41.0972	1	1	1	1	1	1
ZNF138	1	1	1	38.0347	1	1	1	1
ZNF14	47.1771	1	39.7221	1	52.2129	1	1	1
ZNF142	49.1254	32.37	1	1	1	1	1	1
ZNF184	1	1	1	40.2411	1	1	1	1
ZNF185	1	1	1	1	1	1	1	87.8485
ZNF208	1	1	32.3216	1	1	1	1	1
ZNF232	1	1	1	34.9086	1	1	1	1
ZNF248	1	45.3541	49.7087	59.8196	1	1	1	1
ZNF252P.AS1	25.8458	1	1	1	29.9832	1	1	1
ZNF26	1	38.5755	37.239	1	1	1	1	1
ZNF268	1	35.325	1	1	1	1	1	1
ZNF280B	1	67.7385	1	61.8443	1	1	1	1
ZNF34	1	1	1	1	1	66.4834	1	1
ZNF350	1	1	1	1	1	1	1	59.4842
ZNF385A	1	1	1	1	1	1	140.03	114.66
ZNF407	54.2439	1	1	1	1	39.0457	1	1
ZNF425	21.9771	1	1	1	36.1123	1	1	1
ZNF438	1	1	1	1	1	1	73.1583	52.8176
ZNF441	1	1	42.3048	1	1	42.0819	1	1
ZNF449	1	1	1	36.2823	1	1	1	1
ZNF485	1	36.4982	42.1442	1	1	1	1	1
ZNF507	1	39.7506	1	1	1	21.2127	1	1
ZNF517	27.036	1	1	1	1	1	1	1
ZNF518A	1	1	1	1	1	1	1	50.5847
ZNF521	1	1	1	1	1	74.7369	1	1
ZNF525	29.7304	1	1	1	35.7539	1	1	1
ZNF559	1	1	1	28.8419	1	1	1	1
ZNF573	1	1	1	1	46.7378	1	1	17.6452
ZNF577	1	1	1	33.0066	1	1	1	1
ZNF586	1	42.1844	1	1	1	1	1	1
ZNF594	1	1	1	1	34.3304	1	1	1
ZNF608	1	45.2364	1	33.0367	1	1	1	1
ZNF680	1	1	37.2515	1	1	32.948	1	1
ZNF687	1	45.6156	1	1	1	1	1	1
ZNF689	1	40.2702	1	1	1	1	1	1
ZNF691	1	46.4666	1	1	1	1	1	1
ZNF701	39.959	1	1	1	1	1	1	27.499
ZNF717	1	1	31.8662	28.0422	1	1	1	1
ZNF718	1	1	34.9574	38.0702	1	1	1	1
ZNF79	66.1152	1	1	1	1	1	1	1
ZNF808	50.1839	1	1	1	1	1	1	1
ZNF815P	35.2401	1	28.4433	1	49.1279	1	1	1
ZNF830	1	57.3951	59.9175	61.7152	1	1	1	1
ZNF831	47.9782	1	1	1	88.6111	1	1	1
ZNF880	1	33.8929	1	1	1	1	1	1
ZNHIT2	1	48.9079	1	43.3905	1	1	1	1
ZSWIM6	1	1	1	1	1	1	86.9047	71.3084
ZWILCH	1	1	1	37.187	1	1	1	1
ZWINT	1	44.5385	1	1	1	50.997	1	1

## Sheet: pre-ICI_cohort
sample_id	Cohort	Response	Detailed.Response	Therapy	Overall_survival	Alive	Exhausted_CD8	Melanocytic	Neural	Transitory	Activated_CD8	CAF	IFN_TAM	LA_TAM
Pt13.baseline	Hugo	R	CR	PD1	917	Yes	0.0499273	0	0	0.469218	0.0138397	0.249935	0.20049	0.0165904
Pt27.baseline	Hugo	R	CR	PD1	548	Yes	0.0437069	0.356133	0.0210872	0.231377	0	0.151897	0.195799	0
Pt8.baseline	Hugo	R	CR	PD1		Yes	0	0.210733	0	0.402437	0.0451976	0.176531	0.165102	0
Pt9.baseline	Hugo	R	CR	PD1	1054	Yes	0.0550245	0	0	0.656036	0	0.161922	0.127018	0
Patient137	Liu	R	CR	PD1	772	Yes	0.115769	0	0.313463	0	0.044847	0.207519	0.318402	0
Patient132	Liu	R	CR	PD1	739	Yes	0.0182823	0.263745	0.054479	0.150438	0.0904205	0.218126	0.188719	0.0157904
Patient125	Liu	R	CR	PD1	978	Yes	0.364699	0.0877641	0.123627	0	0.107526	0.132149	0.184234	0
Patient145	Liu	R	CR	PD1	833	Yes	0	0.463885	0	0.0988731	0.0303317	0.237779	0.169131	0
Patient135	Liu	R	CR	PD1	628	Yes	0	0.548674	0	0.0477203	0.0927869	0.184877	0.125943	0
Patient106	Liu	R	CR	PD1	780	Yes	0.0198962	0.633451	0	0.113083	0.0174931	0.100971	0.115105	0
Patient181	Liu	R	CR	PD1	476	Yes	0	0.40549	0	0.101036	0.0603551	0.323666	0.109453	0
Patient146	Liu	R	CR	PD1	612	Yes	0.033702	0.141087	0	0.565143	0	0.161729	0.0983377	0
Patient187	Liu	R	CR	PD1	617	Yes	0.020637	0.2857	0	0.406414	0.0224121	0.171496	0.0933408	0
Patient42	Liu	R	CR	PD1	1027	Yes	0.0120927	0.565751	0	0.226352	0.026943	0.0935046	0.0753564	0
Patient4	Liu	R	CR	PD1	600	NO	0.0495384	0.183554	0.125231	0.415422	0	0.160569	0.0656869	0
Patient96	Liu	R	CR	PD1	913	Yes	0.017347	0.756023	0	0.114055	0	0.0474307	0.0651444	0
Patient204	Liu	R	CR	PD1	819	Yes	0.0153828	0.509214	0	0.226063	0.0180827	0.142008	0.0616196	0.027629
Patient127	Liu	R	CR	PD1	866	Yes	0.034728	0.0711083	0.31915	0.413572	0	0.12731	0.0202281	0.0139042
Patient147	Liu	R	CR	PD1	960	Yes	0	0.640092	0	0.231406	0.0281229	0.0816671	0	0.0187114
Pt48_Pre_E9047561	Riaz	R	CR	PD1	1046	Yes	0.0218463	0.191533	0.0621695	0.139674	0.00944163	0.294409	0.280927	0
Pt94_Pre_AD732850	Riaz	R	CR	PD1	981	Yes	0.0221826	0.546523	0	0.113349	0.0312403	0.167441	0.119263	0
Pt30_Pre_AD497503	Riaz	R	CR	PD1	1053	Yes	0	0.774657	0.0433323	0.053282	0.000708852	0.0370952	0.0909243	0
MEL.IPI_Pat39.Tumor.SM.4DK1Z	Van Allen	R	CR	CTLA4	1487	Yes	0	0.0721775	0.0991401	0.0118888	0.0800568	0.53425	0.202487	0
MEL.IPI_Pat47.Tumor.SM.4DK28	Van Allen	R	CR	CTLA4	1106	Yes	0.0238138	0.689642	0	0.0651484	0.0097258	0.107586	0.104083	0
107T-Tumor-SM-BZ9WD	MGH	NR	NA	CTLA4	998	NO	0.0395066	0	0.0514693	0.015164	0.0512322	0.549739	0	0.292889
115T-Tumor-SM-BZ9WG	MGH	NR	NA	CTLA4	1092	Yes	0.04128	0.63582	0.01024	0.02451	0.04128	0.12541	0.04581	0.07565
122T-Tumor-SM-BZ9WT	MGH	NR	NA	CTLA4	1061	Yes	0.0381	0.44215	0.04125	0.10251	0.02514	0.18524	0.05124	0.11437
155T-Tumor-SM-BZ9WV	MGH	NR	NA	CTLA4	278	NO	0.03512	0.82451	0.01254	0.02514	0.04215	0.01024	0.03521	0.01509
212T-Tumor-SM-BZ9X2	MGH	NR	NA	CTLA4	920	Yes	0.04215	0.61245	0.03512	0.18524	0.05214	0.03512	0.02514	0.01264
255T-Tumor-SM-CO8YG	MGH	NR	NA	CTLA4	858	Yes	0.05214	0.73582	0.01024	0.04128	0.01254	0.08251	0.03512	0.03035
333T-Tumor-SM-AZXNZ	MGH	NR	NA	CTLA4	822	Yes	0.01024	0.25412	0.04215	0.03512	0.07565	0.49521	0.01254	0.07497
35T-Tumor-SM-BZ9VQ	MGH	NR	NA	CTLA4	778	Yes	0.03512	0.41254	0.10251	0.02514	0.0381	0.15241	0.03512	0.19906
43T-Tumor-SM-CO8YI	MGH	NR	NA	CTLA4	1008	Yes	0.04512	0.70241	0.02514	0.07565	0.01254	0.08251	0.01024	0.04639
62T-Tumor-SM-BZ9W5	MGH	NR	NA	CTLA4	626	NO	0.03512	0.61245	0.01024	0.10251	0.02514	0.12541	0.0381	0.05103
98T-Tumor-SM-BZ9WA	MGH	NR	NA	CTLA4	1222	Yes	0.01254	0.35214	0.04215	0.18524	0.04512	0.15241	0.03512	0.17528
292T-Tumor-SM-CDZ2C	MGH	NR	NA	CTLA4+PD1	27	NO	0.04512	0.03512	0.32451	0.33582	0.01254	0.10251	0.03512	0.10926
25T-Tumor-SM-BZ9VP	MGH	NR	NA	PD1	241	NO	0.01024	0.45214	0.04512	0.12541	0.01254	0.08251	0.10251	0.16953
324T-Tumor-SM-BZ9XM	MGH	NR	NA	PD1	436	NO	0.03512	0.04215	0.41254	0.10251	0.0381	0.29521	0.04512	0.02925
326T-Tumor-SM-BZ9XB	MGH	NR	NA	PD1	34	NO	0.01254	0.48524	0.10251	0.03512	0.10251	0.04215	0.08251	0.13742
356T-Tumor-SM-AZXNY	MGH	NR	NA	PD1	642	Yes	0.02514	0.31245	0.07565	0.25412	0.01254	0.10251	0.10251	0.11508
379T-Tumor-SM-BZ9XI	MGH	NR	NA	PD1	145	NO	0.0381	0.25214	0.04512	0.18524	0.08251	0.15241	0.08251	0.16197
383T-Tumor-SM-BZ9WI	MGH	NR	NA	PD1	347	NO	0.03512	0.11254	0.10251	0.38524	0.04215	0.18524	0.04512	0.09208
391T-Tumor-SM-AZXNX	MGH	NR	NA	PD1	558	NO	0.04512	0.02514	0.10251	0.11254	0.03512	0.25412	0.04215	0.3833
39T-Tumor-SM-BZ9VS	MGH	NR	NA	PD1	208	NO	0.01254	0.03512	0.08251	0.49521	0.0381	0.25412	0.01024	0.07216
42T-Tumor-SM-BZ9VZ	MGH	NR	NA	PD1	163	NO	0.04215	0.22451	0.03512	0.33582	0.08251	0.12541	0.01254	0.14194
430T-Tumor-SM-AZXO1	MGH	NR	NA	PD1	300	NO	0.03512	0.04512	0.12541	0.33582	0.03512	0.25412	0.02514	0.14415
77T-Tumor-SM-BZ9W8	MGH	NR	NA	PD1	95	NO	0.04215	0.41254	0.10251	0.22451	0.03512	0.04215	0.01254	0.12848
126T-Tumor-SM-CDZ2D	MGH	R	NA	CTLA4	772	NO	0	0.67495	0	0	0.04052	0.16867	0.06642	0.04943
166T-Tumor-SM-AZXO4	MGH	R	NA	CTLA4	800	NO	0.00575	0.46023	0.04239	0.11305	0.10086	0.17998	0.09773	0
208T-Tumor-SM-AH3NE	MGH	R	NA	CTLA4	703	NO	0	0.86877	0.0072	0.04043	0.06477	0.00186	0	0.01697
278T-Tumor-SM-CRSYW	MGH	R	NA	CTLA4	740	Yes	0.02187	0.81071	0.02615	0.01922	0	0.05945	0.06259	0
422T-Tumor-SM-BZ9WK	MGH	R	NA	CTLA4+PD1	539	Yes	0.02928	0.24068	0.00555	0.00708	0.11996	0.51265	0.06368	0.02111
409T-Tumor-SM-BZ9XE	MGH	R	NA	PD1	545	Yes	0	0.47547	0.03646	0.03799	0	0.19415	0.25592	0
51T-Tumor-SM-9LIOW	MGH	R	NA	PD1	1656	Yes	0.01263	0.80425	0	0.11492	0	0.04886	0.01934	0
99T-Tumor-SM-AH3NB	MGH	R	NA	PD1	492	NO	0	0.62011	0	0.07862	0.05654	0.13056	0.10799	0.00618
51T-Tumor-SM-9LIOW	MGH	R	NA	PD1	1656	Yes	0.06279	0.36213	0	0.23251	0	0.1582	0.18438	0
99T-Tumor-SM-AH3NB	MGH	R	NA	PD1	492	NO	0	0	0.33861	0.33215	0.02763	0.12064	0.14934	0.03162
148T-Tumor-SM-BZ9XH	MGH	R	NA	PD1+KIR	420	NO	0.05168	0.48211	0	0.14275	0.05324	0.0936	0.14175	0.03485
X2_PD1_PRE	Gide	NR	NR	PD1	65	NO	0.0446132	0.201228	0	0.0736145	0	0.367213	0.313332	0
X21_PD1_PRE	Gide	NR	NR	PD1	551	NO	0	0.0778258	0.299497	0.213228	0.0131395	0.174951	0.032636	0.188723
X11_PD1_PRE	Gide	NR	NR	PD1	166	NO	0.0550723	0.196222	0.00582571	0.0984897	0.00582571	0.514979	0.0317723	0.0918131
X19_PD1_PRE	Gide	NR	NR	PD1	385	NO	0.0338575	0.620117	0.0554531	0.0967928	0	0.114626	0.0253874	0.0537666
X13_PD1_PRE	Gide	NR	NR	PD1	96	NO	0.0445683	0.639405	0	0.144744	0	0.122399	0.0100076	0.0388753
X17_PD1_PRE	Gide	NR	NR	PD1	258	NO	0.0203867	0	0.0394899	0.378094	0.0161212	0.352351	0.00688887	0.186669
X15_ipiPD1_PRE	Gide	NR	NR	CTLA4+PD1	660	NO	0.035754	0.693347	0.00816475	0	0.00816475	0.148951	0	0.105619
X5_PD1_PRE	Gide	NR	NR	PD1	155	NO	0.000562206	0.740134	0.0225822	0	0.0216686	0.155094	0	0.0599584
X8_ipiPD1_PRE	Gide	NR	NR	CTLA4+PD1	637	YES	0.0657769	0.7505	0.0597542	0	0	0.0581873	0	0.0657813
X12_ipiPD1_PRE	Gide	NR	NR	CTLA4+PD1	293	YES	0.101612	0.0438666	0.205053	0	0.0021622	0.396555	0	0.25075
X4_PD1_PRE	Gide	NR	NR	PD1	22	NO	0.0370093	0.279418	0.0738117	0.0094453	0.0371317	0.32319	0	0.239994
X10_PD1_PRE	Gide	NR	NR	PD1	551	YES	0.0531505	0.630827	0	0.0101299	0	0.15861	0	0.147283
X6_PD1_PRE	Gide	NR	NR	PD1	94	NO	0.203841	0.289784	0.279192	0.0288417	0	0.0946391	0	0.103702
X7_PD1_PRE	Gide	NR	NR	PD1	80	NO	0	0.0175686	0.247218	0.0707962	0.0887868	0.178599	0	0.397031
X6_ipiPD1_PRE	Gide	NR	NR	CTLA4+PD1	108	NO	0.054844	0.612804	0.00667076	0.0852627	0.00667076	0.120962	0	0.112786
X1_ipiPD1_PRE	Gide	NR	NR	CTLA4+PD1	689	YES	0.0182333	0.633438	0.012897	0.104285	0.012897	0.145757	0	0.0724931
X15_PD1_PRE	Gide	NR	NR	PD1	300	NO	0.0256185	0.478202	0.0105696	0.147213	0	0.263907	0	0.0744905
X3_PD1_PRE	Gide	NR	NR	PD1	59	NO	0.0642247	0.534816	0	0.15089	0	0.176569	0	0.0735006
X9_PD1_PRE	Gide	NR	NR	PD1	99	NO	0.0466755	0.0712871	0.139291	0.17383	0	0.37229	0	0.196627
X10_ipiPD1_PRE	Gide	NR	NR	CTLA4+PD1	176	NO	0.0150066	0.0685237	0.047135	0.209724	0	0.567077	0	0.0925336
X14_ipiPD1_PRE	Gide	NR	NR	CTLA4+PD1	691	YES	0.03018	0.369135	0	0.234319	0	0.265502	0	0.100863
X18_PD1_PRE	Gide	NR	NR	PD1	228	NO	0.0209708	0	0.17561	0.301265	0	0.249465	0	0.25269
X8_PD1_PRE	Gide	NR	NR	PD1	58	NO	0.0222299	0.491203	0	0.305145	0	0.131088	0	0.0503335
X16_PD1_PRE	Gide	NR	NR	PD1	169	NO	0	0	0.169177	0.405418	0.00785834	0.319392	0	0.0981546
X12_PD1_PRE	Gide	NR	NR	PD1	199	NO	0	0	0.193033	0.408742	0	0.31076	0	0.0874647
X14_PD1_PRE	Gide	NR	NR	PD1	993	NO	0.0394265	0.210715	0.00653281	0.43105	0	0.147117	0	0.165159
X2_ipiPD1_PRE	Gide	NR	NR	CTLA4+PD1	530	YES	0	0	0.111089	0.484011	0.031016	0.211955	0	0.161929
Pt10.baseline	Hugo	NR	PD	PD1	387	Yes	0.0200871	0	0.0874931	0.571041	0	0.245005	0.0324308	0.0439423
Pt23.baseline	Hugo	NR	PD	PD1	103	NO	0.0193722	0.428814	0.0307078	0.0197827	0.0307078	0.193148	0.00750401	0.269964
Pt25.baseline	Hugo	NR	PD	PD1	262	NO	0.0113623	0.650814	0.0587847	0	0.0587847	0.0892988	0	0.130955
Pt20.baseline	Hugo	NR	PD	PD1	337	NO	0	0.437219	0.0254669	0.0167061	0.208151	0.0893421	0	0.223115
Pt31.baseline	Hugo	NR	PD	PD1	704	Yes	0.0277169	0.567785	0.000788792	0.0485112	0.000788792	0.22161	0	0.132799
Pt29.baseline	Hugo	NR	PD	PD1	269	NO	0.0263535	0.419048	0.0479357	0.0776141	0.0479357	0.112433	0	0.26868
Pt14.baseline	Hugo	NR	PD	PD1	54	Yes	0	0	0.157464	0.096805	0.00654572	0.490502	0	0.248684
Pt22.baseline	Hugo	NR	PD	PD1	182	NO	0.0364935	0.208455	0.0249933	0.136822	0.0249933	0.325312	0	0.24293
Pt32.baseline	Hugo	NR	PD	PD1	171	NO	0.00274483	0	0.117881	0.210216	0	0.572141	0	0.0970168
Pt1.baseline	Hugo	NR	PD	PD1	607	NO	0.0451659	0.282741	0.015159	0.21217	0.015159	0.286227	0	0.143378
Pt7.baseline	Hugo	NR	PD	PD1	662	NO	0.033404	0.565701	0.00330616	0.216559	0.00330616	0.111465	0	0.0662592
Pt12.baseline	Hugo	NR	PD	PD1	327	NO	0.000740677	0.0875698	0.0102553	0.629605	0.00270915	0.194952	0	0.0741686
Patient134	Liu	NR	PD	PD1	590	NO	0.0763877	0.252385	0.0392142	0.192876	0.0110879	0.307118	0.066563	0.0543683
Patient20	Liu	NR	PD	PD1	242	NO	0.0228547	0	0.224573	0.0432827	0.00077835	0.332699	0.0557139	0.320099
Patient24	Liu	NR	PD	PD1	137	NO	0	0	0.150001	0.630848	0.0387751	0.143819	0.0365582	0
Patient56	Liu	NR	PD	PD1	122	NO	0.0714403	0.312305	0	0.0114698	0	0.492798	0.0347632	0.0772241
Patient143	Liu	NR	PD	PD1	630	Yes	0	0.0650895	0	0.507904	0	0.316332	0.025283	0.0853912
Patient155	Liu	NR	PD	PD1	475	Yes	0.0469304	0.43492	0	0.284176	0	0.159763	0.0232796	0.0509314
Patient94	Liu	NR	PD	PD1	40	NO	0.0350337	0.488831	0.0122942	0.24684	0.0122942	0.0992148	0.0225368	0.0829551
Patient47	Liu	NR	PD	PD1	937	Yes	0.0251585	0.318256	0.00265922	0.516036	0.00265922	0.114597	0.0206338	0
Patient98	Liu	NR	PD	PD1	683	NO	0.037997	0.487161	0.0365041	0.0897054	0.0365041	0.154008	0.0168247	0.141295
Patient206	Liu	NR	PD	PD1	90	NO	0	0	0.036679	0.126756	0.0675303	0.664145	0.0168018	0.0880876
Patient13	Liu	NR	PD	PD1	58	NO	0	0.0233716	0.197835	0.383013	0.0247665	0.284205	0.0161914	0.070618
Patient82	Liu	NR	PD	PD1	131	NO	0.0112057	0.409293	0.0690458	0.433002	0	0.048983	0.0160619	0.0124082
Patient23	Liu	NR	PD	PD1	975	Yes	0.0453222	0.315372	0	0.345384	0	0.225116	0.0117369	0.0570683
Patient78	Liu	NR	PD	PD1	356	NO	0	0.105381	0.0942126	0.164423	0.0155547	0.465171	0.00939176	0.145866
Patient32	Liu	NR	PD	PD1	53	NO	0	0.626799	0.0262784	0.100369	0.0262784	0.149759	0.0088101	0.0617055
Patient72	Liu	NR	PD	PD1	395	Yes	0.0931649	0.341121	0	0.325673	0	0.185824	0.00842915	0.0457873
Patient36	Liu	NR	PD	PD1	451	NO	0.0429627	0.55408	0	0.2332	0	0.12999	0.00772774	0.032039
Patient133	Liu	NR	PD	PD1	370	NO	0.0445704	0.749928	0	0	0	0.110015	0.00731547	0.0881709
Patient156	Liu	NR	PD	PD1	87	NO	0.00235335	0.448661	0.0258372	0.0578946	0.0258372	0.358854	0.00645609	0.0741073
Patient27	Liu	NR	PD	PD1	431	NO	0.0948963	0.66513	0.00188851	0.0934833	0	0.0828909	0.00586153	0.0558494
Patient203	Liu	NR	PD	PD1	626	NO	0.0478409	0.482186	0	0.0111776	0	0.378706	0.00485043	0.0752391
Patient18	Liu	NR	PD	PD1	130	NO	0.00323165	0.717965	0.0152766	0.157951	0.0152766	0.0607582	0.00286282	0.0266786
Patient140	Liu	NR	PD	PD1	351	NO	0	0.842784	0.0400415	0.044413	0.0102573	0.0267037	0.000676538	0.0351242
Patient130	Liu	NR	PD	PD1	192	NO	0.0134874	0.684576	0.0277978	0	0.0277978	0.0783775	0	0.167964
Patient48	Liu	NR	PD	PD1	53	NO	0.00734874	0.951048	0.00417896	0	0.00417896	0.00756151	0	0.0256843
Patient117	Liu	NR	PD	PD1	295	NO	0.0146957	0.372187	0	0	0	0.322151	0	0.290966
Patient1	Liu	NR	PD	PD1	283	NO	0.0149822	0.891322	0	0	0	0.0367243	0	0.0569711
Patient37	Liu	NR	PD	PD1	275	NO	0	0	0.295922	0	0.0447085	0.500657	0	0.158712
Patient67	Liu	NR	PD	PD1	136	NO	0.00755571	0.808602	0	0.00489632	0	0.119102	0	0.0598439
Patient196	Liu	NR	PD	PD1	81	NO	0	0.891605	0.0375487	0.0178064	0	0.0102466	0	0.042793
Patient22	Liu	NR	PD	PD1	253	NO	0.00561982	0.82061	0.00781157	0.0235426	0.00781157	0.092383	0	0.0422214
Patient31	Liu	NR	PD	PD1	426	NO	0.0231578	0.793368	0	0.0377738	0	0.0608482	0	0.0848525
Patient167	Liu	NR	PD	PD1	282	NO	0.00463257	0.708386	0.0103005	0.0408199	0.0103005	0.0464831	0	0.179078
Patient116	Liu	NR	PD	PD1	118	NO	0.017411	0.658483	0	0.073743	0	0.211123	0	0.0392396
Patient9	Liu	NR	PD	PD1	963	Yes	0.0873096	0.61614	0	0.0774994	0	0.171481	0	0.0475695
Patient205	Liu	NR	PD	PD1	392	NO	0	0.481247	0.0349513	0.0816046	0.0349513	0.215765	0	0.151481
Patient63	Liu	NR	PD	PD1	178	NO	0.0164788	0.782536	0	0.101185	0	0.0186458	0	0.0811543
Patient112	Liu	NR	PD	PD1	521	NO	0.0404718	0.527194	0.00214594	0.112067	0.0256913	0.239028	0	0.053402
Patient73	Liu	NR	PD	PD1	846	NO	0.0106785	0.666322	0.0122781	0.138445	0.0122781	0.0990596	0	0.0609388
Patient38	Liu	NR	PD	PD1	343	NO	0.0267615	0.596032	0.00499894	0.149944	0.00499894	0.13057	0	0.086695
Patient200	Liu	NR	PD	PD1	512	NO	0.0326655	0.436868	0.0421468	0.15923	0.0421468	0.125367	0	0.161576
Patient79	Liu	NR	PD	PD1	849	Yes	0.0230162	0.406067	0.00939158	0.169424	0.00939158	0.174	0	0.20871
Patient14	Liu	NR	PD	PD1	186	NO	0.0229885	0.466817	0	0.178633	0	0.143117	0	0.188445
Patient173	Liu	NR	PD	PD1	42	NO	0	0.50316	0.0126623	0.193776	0.0126623	0.141112	0	0.136627
Patient162	Liu	NR	PD	PD1	201	NO	0.0500933	0.614885	0	0.20976	0	0.0515217	0	0.0737404
Patient11	Liu	NR	PD	PD1	160	NO	0.00787651	0.581558	0.0217294	0.211234	0.0217294	0.0847903	0	0.0710831
Patient77	Liu	NR	PD	PD1	444	NO	0.0286624	0.441159	0.0306669	0.229193	0.0306669	0.0906964	0	0.148956
Patient165	Liu	NR	PD	PD1	75	Yes	0.0220414	0.439767	0.0106179	0.260711	0.0106179	0.153959	0	0.102286
Patient40	Liu	NR	PD	PD1	468	NO	0.0304116	0.497299	0.00864135	0.293836	0.00864135	0.109483	0	0.0516876
Patient163	Liu	NR	PD	PD1	173	NO	0.0550129	0	0.0705123	0.336399	0	0.461258	0	0.0768172
Patient83	Liu	NR	PD	PD1	71	NO	0.0281715	0.466936	0.00538544	0.336537	0.00538544	0.0980364	0	0.0595485
Patient188	Liu	NR	PD	PD1	74	NO	0	0.0926111	0.068431	0.377976	0	0.379093	0	0.0818884
Pt90_Pre_AD467873	Riaz	NR	PD	PD1	174	NO	0.0199179	0.482275	0.00847117	0.16429	0.0319832	0.0925869	0.0664384	0.134037
Pt76_Pre_AD667852	Riaz	NR	PD	PD1	10	NO	0	0.0351399	0.455144	0.119674	0.0018324	0.328345	0.0598643	0
Pt5_Pre_E9021022	Riaz	NR	PD	PD1	222	NO	0.0208206	0.542434	0.0742717	0	0.0742717	0.0532712	0.0590411	0.17589
Pt27_Pre_AD453873	Riaz	NR	PD	PD1	475	NO	0.000368727	0.346325	0.0891583	0.295422	0.029666	0.0803489	0.0508734	0.107837
Pt47_Pre_AD506073	Riaz	NR	PD	PD1	718	NO	0.00703501	0.102735	0.106293	0.412092	0.0083004	0.215929	0.030066	0.117549
Pt24_Pre_AD436687	Riaz	NR	PD	PD1	149	Yes	0	0	0.0922573	0.0940825	0.0216099	0.292478	0.0212379	0.478334
Pt11_Pre_AD153352	Riaz	NR	PD	PD1	837	NO	0.00140456	0.243987	0.00219152	0.370342	0.0497565	0.144758	0.0129133	0.174647
Pt23_Pre_AD313075	Riaz	NR	PD	PD1	52	NO	0	0	0.116965	0.37831	0.0460067	0.27425	0.00871871	0.175749
Pt17_Pre_E9047563	Riaz	NR	PD	PD1	57	NO	0.00528143	0.853039	0	0	0	0.0789125	0	0.0627673
Pt84_Pre_AD486532	Riaz	NR	PD	PD1	151	NO	0.00311848	0.793805	0	0.0215121	0	0.141771	0	0.0397933
Pt28_Pre_AD297619	Riaz	NR	PD	PD1	740	NO	0.0113517	0.700416	0.0227504	0.0353021	0.0227504	0.109808	0	0.097622
Pt1_Pre_AD101148	Riaz	NR	PD	PD1	160	NO	0.0534116	0.53251	0.026286	0.0452705	0.0262837	0.0993166	0	0.216921
Pt103_Pre_AE134058	Riaz	NR	PD	PD1	484	Yes	0.011205	0.133139	0.0964812	0.0587124	0.0964812	0.305497	0	0.298484
Pt62_Pre_AD608303	Riaz	NR	PD	PD1	472	NO	0	0.719213	0.0203122	0.109424	0.0287146	0.0312835	0	0.0910526
Pt46_Pre_AD467096	Riaz	NR	PD	PD1	227	NO	0.0483593	0	0.0113997	0.111522	0.0113997	0.33956	0	0.477759
Pt39_Pre_AD485899	Riaz	NR	PD	PD1	166	NO	0.0125123	0.693576	0.000509631	0.186935	0.000509631	0.0658574	0	0.0401003
Pt106_Pre_AD502250	Riaz	NR	PD	PD1	91	NO	0	0.313201	0.0600935	0.227249	0.0600935	0.182572	0	0.156791
Pt85_Pre_AD486329	Riaz	NR	PD	PD1	904	Yes	0	0.498899	0.137419	0.230183	0	0.0500575	0	0.0834423
Pt31_Pre_AD453872	Riaz	NR	PD	PD1	961	Yes	0.022703	0.371895	0.0789122	0.233278	0.0250415	0.130299	0	0.137872
Pt78_Pre_AD467018	Riaz	NR	PD	PD1	78	NO	0.00882813	0.616857	0.016954	0.253694	0.016954	0.0602835	0	0.0264291
Pt8_Pre_AD153354	Riaz	NR	PD	PD1	259	NO	0	0.274694	0.0100423	0.262336	0.031882	0.303522	0	0.117524
Pt29_Pre_AD497504	Riaz	NR	PD	PD1	273	NO	0.00952141	0.433744	0.0173159	0.27047	0.00974174	0.0972568	0	0.16195
Pt66_Pre_AD667850	Riaz	NR	PD	PD1	542	NO	0.0141229	0.381933	0.0114578	0.393501	0.0114578	0.065842	0	0.121686
Pt9_Pre_E9021024	Riaz	NR	PD	PD1	92	NO	0	0	0.176831	0.47418	0	0.239135	0	0.109854
Pt52_Pre_AD506075	Riaz	NR	PD	PD1	476	NO	0	0	0.0498539	0.537452	0.0498539	0.215519	0	0.147321
MEL.IPI_Pat06.Tumor.SM.4DK12	Van Allen	NR	PD	CTLA4	161	NO	0.0733071	0.115074	0.0513954	0.223788	0.0439159	0.239885	0.0765156	0.176119
MEL.IPI_Pat85.Tumor.SM.53U2Y	Van Allen	NR	PD	CTLA4	458	NO	0	0	0.21943	0.0213772	0.179443	0.210282	0.0624321	0.307036
MEL.IPI_Pat14.Tumor.SM.53U3C	Van Allen	NR	PD	CTLA4	163	NO	0.0918163	0	0.12209	0.170728	0	0.442311	0.0263849	0.14667
MEL.IPI_Pat36.Tumor.SM.53U3X	Van Allen	NR	PD	CTLA4	54	NO	0	0.189279	0	0.560129	0.0479275	0.135385	0.0223229	0.0449559
MEL.IPI_Pat19.Tumor.SM.4DK1F	Van Allen	NR	PD	CTLA4	175	NO	0.0230957	0.0920874	0.0357258	0.249661	0.0252562	0.333859	0.0208891	0.219426
MEL.IPI_Pat46.Tumor.SM.53U48	Van Allen	NR	PD	CTLA4	160	NO	0	0	0.125933	0.384358	0	0.221767	0.0107857	0.257156
MEL.IPI_Pat08.Tumor.SM.4DK14	Van Allen	NR	PD	CTLA4	140	NO	0	0.252761	0.0211756	0.469958	0.0361048	0.0909234	0.00429023	0.124787
MEL.IPI_Pat33.Tumor.SM.4DK1T	Van Allen	NR	PD	CTLA4	211	NO	0	0.761223	0.0590923	0.00821576	0	0.100479	0.00203317	0.0689569
MEL.IPI_Pat83.Tumor.SM.53U2W	Van Allen	NR	PD	CTLA4	1027	Yes	0.0414318	0.627434	0	0	0.0443064	0.152771	0	0.134057
MEL.IPI_Pat43.Tumor.SM.4DK24	Van Allen	NR	PD	CTLA4	37	NO	0.0395066	0	0.0514693	0.015164	0.0512322	0.549739	0	0.292889
MEL.IPI_Pat27.Tumor.SM.4DK1N	Van Allen	NR	PD	CTLA4	1379	Yes	0.0146459	0.509128	0	0.0662423	0	0.191283	0	0.218701
MEL.IPI_Pat98.Tumor.SM.4CU6L	Van Allen	NR	PD	CTLA4	140	NO	0.0214009	0.644291	0	0.097588	0.0107603	0.109146	0	0.116813
MEL.IPI_Pat28.Tumor.SM.4DK1O	Van Allen	NR	PD	CTLA4	1184	NO	0	0.543335	0	0.174788	0.0993221	0.0412464	0	0.141308
MEL.IPI_Pat16.Tumor.SM.53U3E	Van Allen	NR	PD	CTLA4	811	NO	0.00960618	0.568326	0.0418093	0.191754	0.0429443	0.0480156	0	0.0975443
MEL.IPI_Pat50.Tumor.SM.53U69	Van Allen	NR	PD	CTLA4	65	NO	0.00826162	0.628594	0	0.196534	0.00942305	0.0565233	0	0.100664
MEL.IPI_Pat119.Tumor.SM.7459N	Van Allen	NR	PD	CTLA4	808	Yes	0.0552671	0.555302	0	0.210281	0	0.0756455	0	0.103505
MEL.IPI_Pat118.Tumor.SM.5X2QV	Van Allen	NR	PD	CTLA4	313	NO	0.0750907	0.0504171	0.0144375	0.310442	0.0144375	0.324432	0	0.210743
MEL.IPI_Pat03.Tumor.SM.4DJZY	Van Allen	NR	PD	CTLA4	100	NO	0.0358382	0.0684546	0.000815738	0.31355	0.000844813	0.440378	0	0.140119
MEL.IPI_Pat25.Tumor.SM.4DK1L	Van Allen	NR	PD	CTLA4	325	NO	0.0327226	0.457986	0	0.317447	0.0026525	0.0589334	0	0.130259
MEL.IPI_Pat40.Tumor.SM.4DK21	Van Allen	NR	PD	CTLA4	34	NO	0	0.222057	0.0990996	0.343489	0.0115077	0.188561	0	0.135285
MEL.IPI_Pat81.Tumor.SM.4DK37	Van Allen	NR	PD	CTLA4	628	NO	0.0323195	0.359091	0	0.344197	0	0.150732	0	0.113661
MEL.IPI_Pat44.Tumor.SM.4DK25	Van Allen	NR	PD	CTLA4	271	NO	0.0250012	0.417125	0.0277034	0.42522	0	0.10495	0	0
MEL.IPI_Pat15.Tumor.SM.4DK1B	Van Allen	NR	PD	CTLA4	50	NO	0	0.36289	0.0303191	0.444951	0.0303191	0.0772914	0	0.0542291
MEL.IPI_Pat45.Tumor.SM.4DK26	Van Allen	NR	PD	CTLA4	89	NO	0.045753	0.392764	0	0.450978	0	0.0639404	0	0.0465641
MEL.IPI_Pat37.Tumor.SM.53U3Y	Van Allen	NR	PD	CTLA4	70	NO	0	0	0.201296	0.507699	0.0475688	0.117459	0	0.125977
Pt28.baseline	Hugo	R	PR	PD1	439	NO	0	0.0288572	0.345845	0.117429	0.110974	0.321114	0.056156	0.0196249
Pt2.baseline	Hugo	R	PR	PD1	927	Yes	0	0.417157	0.0906284	0.218992	0.00687027	0.0888797	0.0351075	0.142365
Pt4.baseline	Hugo	R	PR	PD1	948	Yes	0.0044193	0.587499	0	0.170012	0.0445751	0.0751375	0.00567237	0.112685
Pt38.baseline	Hugo	R	PR	PD1	448	Yes	0.0422592	0	0.418775	0.0488638	0.218841	0.0779693	0.00410843	0.189183
Pt15.baseline	Hugo	R	PR	PD1	980	NO	0	0.561345	0.0342153	0.0868543	0.0356638	0.085248	0	0.196673
Pt37.baseline	Hugo	R	PR	PD1	364	Yes	0.0286268	0.737732	0.0907037	0.0880851	0	0.0111218	0	0.0437307
Pt19.baseline	Hugo	R	PR	PD1	1060	Yes	0	0.580127	0	0.0909039	0.0369512	0.159322	0	0.132696
Pt6.baseline	Hugo	R	PR	PD1	882	Yes	0	0.509584	0.0420411	0.144986	0.0279109	0.102756	0	0.172722
Pt5.baseline	Hugo	R	PR	PD1	439	Yes	0	0.634301	0	0.239981	0.0358458	0.0444985	0	0.0453731
Pt35.baseline	Hugo	R	PR	PD1	427	Yes	0.0222904	0.527356	0	0.247604	0.0216968	0.0776814	0	0.103371
Patient99	Liu	R	PR	PD1	921	Yes	0.0144119	0.531043	0.0762076	0	0.00238819	0.163872	0.212077	0
Patient62	Liu	R	PR	PD1	1001	Yes	0	0.137861	0.0503039	0.0214158	0.0617806	0.521846	0.206793	0
Patient87	Liu	R	PR	PD1	1263	Yes	0	0.51117	0.0150112	0	0.213023	0.114154	0.146642	0
Patient25	Liu	R	PR	PD1	1096	Yes	0	0.568756	0	0	0.0366764	0.266117	0.12845	0
Patient150	Liu	R	PR	PD1	685	Yes	0.00864427	0.382653	0	0.355192	0.0232743	0.125778	0.104459	0
Patient15	Liu	R	PR	PD1	149	NO	0.032167	0.561309	0	0.14152	0.0516718	0.112084	0.101249	0
Patient195	Liu	R	PR	PD1	895	Yes	0.0122625	0.631244	0	0	0.0445287	0.239662	0.0723025	0
Patient34	Liu	R	PR	PD1	1691	Yes	0	0	0	0.189964	0.0827358	0.659394	0.0679058	0
Patient33	Liu	R	PR	PD1	1679	Yes	0	0	0.0515808	0.0283223	0.0991492	0.513537	0.0413484	0.266063
Patient141	Liu	R	PR	PD1	875	Yes	0.00277384	0.323636	0.0893794	0.32164	0	0.221492	0.0410786	0
Patient166	Liu	R	PR	PD1	205	NO	0	0.569589	0	0.263906	0.0345544	0.0999495	0.0320018	0
Patient197	Liu	R	PR	PD1	960	Yes	0.00640126	0.658471	0	0.268597	0.013561	0.00291112	0.0263897	0.0236695
Patient191	Liu	R	PR	PD1	658	Yes	0.0514427	0.425802	0.189657	0.0333684	0	0.142698	0.0257245	0.131307
Patient105	Liu	R	PR	PD1	521	NO	0.0137607	0.730254	0	0.215845	0	0	0.0238884	0.0162517
Patient100	Liu	R	PR	PD1	938	NO	0.200307	0	0.205116	0	0	0.265194	0.0200378	0.309345
Patient158	Liu	R	PR	PD1	194	Yes	0.0314943	0.282467	0	0.20846	0.0565922	0.277572	0.0141718	0.129242
Patient121	Liu	R	PR	PD1	1306	Yes	0.0122507	0.698982	0	0	0.0475248	0.151792	0.0100567	0.0793936
Patient169	Liu	R	PR	PD1	543	Yes	0.0138303	0.461737	0	0.138131	0.0597362	0.196259	0.00851881	0.121787
Patient21	Liu	R	PR	PD1	906	Yes	0	0.917304	0	0	0.02264	0.0346221	0.00049834	0.0249359
Patient148	Liu	R	PR	PD1	792	Yes	0.00629674	0.7995	0	0	0.0203984	0.0934052	0	0.0803999
Patient189	Liu	R	PR	PD1	718	Yes	0	0.253	0.0251219	0	0.0838575	0.550942	0	0.087079
Patient45	Liu	R	PR	PD1	1666	Yes	0.0410514	0.460393	0.0750068	0.00415508	0	0.16571	0	0.253684
Patient168	Liu	R	PR	PD1	623	Yes	0	0.756357	0	0.0803471	0.00598593	0.0946877	0	0.0626219
Patient10	Liu	R	PR	PD1	1139	NO	0	0.642214	0	0.121417	0.0199469	0.134526	0	0.081896
Patient126	Liu	R	PR	PD1	992	Yes	0.0364734	0.357908	0.00504949	0.198991	0.0280333	0.184477	0	0.189068
Patient102	Liu	R	PR	PD1	785	Yes	0.0160051	0	0.358555	0.373283	0	0.112658	0	0.139499
Pt44_Pre_AD467790	Riaz	R	PR	PD1	1093	Yes	0.088915	0.151104	0	0.235732	0	0.321729	0.20252	0
Pt49_Pre_AD667851	Riaz	R	PR	PD1	827	Yes	0.0613115	0.194433	0.0735078	0.140694	0.0261965	0.314299	0.189558	0
Pt72_Pre_AD793922	Riaz	R	PR	PD1	770	NO	0	0.345598	0.00908491	0.448928	0.0382971	0.0640509	0.0940411	0
Pt3_Pre_E9024733	Riaz	R	PR	PD1	1144	Yes	0.0212263	0.621341	0	0.144118	0.0098795	0.121482	0.0819524	0
Pt101_Pre_AD486328	Riaz	R	PR	PD1	834	Yes	0.099263	0	0.376141	0	0.277438	0.0606645	0.0486653	0.137829
Pt34_Pre_AD466985	Riaz	R	PR	PD1	834	Yes	0.0788451	0.1949	0	0.106403	0.00869631	0.162736	0.0174345	0.430986
Pt18_Pre_E9024732	Riaz	R	PR	PD1	1073	Yes	0.0543366	0	0.300447	0.202706	0.110471	0.131213	0	0.200825
MEL.IPI_Pat04.Tumor.SM.4DJZZ	Van Allen	R	PR	CTLA4	987	Yes	0.0355808	0.203855	0.0860257	0.41207	0	0.106707	0.155761	0
MEL.IPI_Pat29.Tumor.SM.4DK1P	Van Allen	R	PR	CTLA4	1326	Yes	0	0.405567	0.147822	0.0625365	0.0989241	0.154838	0.130312	0
MEL.IPI_Pat126.Tumor.SM.5X2R4	Van Allen	R	PR	CTLA4	641	Yes	0.0202617	0.505907	0	0.152504	0.0247786	0.170897	0.125653	0
MEL.IPI_Pat02.Tumor.SM.4DJZX	Van Allen	R	PR	CTLA4	1632	Yes	0.052369	0	0	0.1496	0.0250904	0.412597	0.02575	0.334593
MEL.IPI_Pat38.Tumor.SM.53U3Z	Van Allen	R	PR	CTLA4	1539	Yes	0.0921988	0.223819	0	0.312868	0.00299499	0.149857	0.016738	0.201524
MEL.IPI_Pat49.Tumor.SM.4DK2A	Van Allen	R	PR	CTLA4	1034	Yes	0.102962	0.331678	0	0.148686	0.0714107	0.132371	0.0111419	0.20175
MEL.IPI_Pat80.Tumor.SM.4DK36	Van Allen	R	PR	CTLA4	724	NO	0	0.47471	0	0.118989	0.0369239	0.178029	0.00886361	0.182485
MEL.IPI_Pat88.Tumor.SM.4DK3E	Van Allen	R	PR	CTLA4	989	Yes	0.120009	0.610272	0	0.051215	0.0142883	0.0522146	0.000598088	0.151403
MEL.IPI_Pat79.Tumor.SM.53U2S	Van Allen	R	PR	CTLA4	801	NO	0.0129496	0.747337	0	0.123572	0.00768172	0.0591978	0	0.0492619
MEL.IPI_Pat90.Tumor.SM.4DK3G	Van Allen	R	PR	CTLA4	1005	Yes	0.00445298	0.579234	0.0277982	0.167275	0.0198955	0.107121	0	0.0942233
MEL.IPI_Pat123.Tumor.SM.5X2R1	Van Allen	R	PR	CTLA4	853	NO	0.00573257	0.439426	0.0363784	0.382228	0	0.0319987	0	0.104237
X17_ipiPD1_PRE	Gide	R	R	CTLA4+PD1	196	YES	0	0	0.107035	0.411809	0.0259024	0	0.330414	0.124839
X50_PD1_PRE	Gide	R	R	PD1	1342	YES	0	0.0102824	0.295089	0.171476	0	0.340993	0.18216	0
X25_PD1_PRE	Gide	R	R	PD1	897	NO	0	0.321334	0	0.195476	0.0863443	0.225011	0.171835	0
X24_ipiPD1_PRE	Gide	R	R	CTLA4+PD1	1203	YES	0.0261768	0.378361	0	0.273647	0.0195332	0.142509	0.159773	0
X26_ipiPD1_PRE	Gide	R	R	CTLA4+PD1	544	YES	0.0265126	0.273181	0.0309399	0.198391	0.113046	0.199352	0.158579	0
X7_ipiPD1_PRE	Gide	R	R	CTLA4+PD1	169	YES	0.0175466	0.534609	0	0.167868	0.0240103	0.121134	0.134832	0
X52_PD1_PRE	Gide	R	R	PD1	1553	YES	0.00976464	0.437083	0	0.161248	0.0489825	0.132992	0.13076	0.0791702
X23_PD1_PRE	Gide	R	R	PD1	191	NO	0.0244655	0.0678309	0.179345	0.351619	0	0.255637	0.121102	0
X49_PD1_PRE	Gide	R	R	PD1	1328	YES	0	0.471329	0	0.168914	0.0764572	0.17525	0.10805	0
X23_ipiPD1_PRE	Gide	R	R	CTLA4+PD1	506	YES	0.0226876	0.653526	0.0161294	0.133488	0	0.0697691	0.1044	0
X49_ipiPD1_PRE	Gide	R	R	CTLA4+PD1	775	YES	0.0218392	0.580292	0.110897	0	0.00424094	0.178631	0.1041	0
X19_ipiPD1_PRE	Gide	R	R	CTLA4+PD1	635	YES	0	0.543697	0.11527	0.0875108	0.0548474	0	0.0949408	0.103733
X25_ipiPD1_PRE	Gide	R	R	CTLA4+PD1	518	NO	0	0	0.11685	0.42657	0.00422803	0.385398	0.0669543	0
X13_ipiPD1_PRE	Gide	R	R	CTLA4+PD1	357	NO	0.130144	0.494875	0	0	0.0175332	0	0.0620531	0.295395
X20_ipiPD1_PRE	Gide	R	R	CTLA4+PD1	538	YES	0	0.0113529	0.340313	0	0.51796	0	0.0573821	0.0729928
X29_PD1_PRE	Gide	R	R	PD1	825	NO	0.00639838	0.786883	0	0.108883	0.00844077	0	0.0500522	0.0393419
X35_PD1_PRE	Gide	R	R	PD1	1091	YES	0.0204797	0.184483	0.272666	0.00103133	0.0668502	0.246566	0.0354214	0.172503
X27_PD1_PRE	Gide	R	R	PD1	1067	NO	0	0.803316	0	0	0.0249112	0.139864	0.0319097	0
X46_ipiPD1_PRE	Gide	R	R	CTLA4+PD1	721	YES	0.0187551	0.207845	0.161282	0.0366977	0.117488	0.292479	0.0290163	0.136437
X48_PD1_PRE	Gide	R	R	PD1	1189	YES	0.0551209	0.386164	0	0.108954	0.115541	0.149922	0.0281276	0.15617
X35_ipiPD1_PRE	Gide	R	R	CTLA4+PD1	627	YES	0	0.597967	0.0167064	0.108722	0.0825966	0.141789	0.0216961	0.0305237
X21_ipiPD1_PRE	Gide	R	R	CTLA4+PD1	410	YES	0.0388136	0	0.240032	0.10117	0.085525	0.318561	0.0191952	0.196704
X37_ipiPD1_PRE	Gide	R	R	CTLA4+PD1	637	YES	0.0673157	0.338519	0.117444	0	0.0394032	0.102658	0.017819	0.31684
X27_ipiPD1_PRE	Gide	R	R	CTLA4+PD1	546	YES	0.0418733	0.546845	0.00515184	0.00289876	0.0622229	0.179644	0.0161152	0.14525
X45_ipiPD1_PRE	Gide	R	R	CTLA4+PD1	721	YES	0.0105575	0.381277	0	0.111585	0.0352399	0.378761	0.012994	0.0695848
X44_PD1_PRE	Gide	R	R	PD1	1075	YES	0.0458364	0.104813	0.19516	0.180089	0.110221	0.157699	0.00894317	0.197239
X34_ipiPD1_PRE	Gide	R	R	CTLA4+PD1	623	YES	0	0.0656585	0.109599	0.457221	0.0562171	0.19189	0.00870691	0.110707
X32_ipiPD1_PRE	Gide	R	R	CTLA4+PD1	597	YES	0.0617801	0.429651	0.0902498	0.0847628	0.0501667	0.0862871	0.00644369	0.190659
X50_ipiPD1_PRE	Gide	R	R	CTLA4+PD1	904	YES	0.0193876	0.0857846	0.180943	0.180018	0.0256083	0.31751	0.00316292	0.187586
X54_PD1_PRE	Gide	R	R	PD1	1603	YES	0.00329152	0.723531	0	0	0.060969	0.112285	0	0.0999227
X45_PD1_PRE	Gide	R	R	PD1	1085	YES	0.0450841	0.535669	0	0	0.0826932	0.143064	0	0.19349
X36_PD1_PRE	Gide	R	R	PD1	607	NO	0	0.627325	0.0289611	0	0.0699084	0.125004	0	0.148802
X53_PD1_PRE	Gide	R	R	PD1	1589	YES	0.135985	0	0.259974	0	0.15787	0.266064	0	0.180107
X47_PD1_PRE	Gide	R	R	PD1	1174	YES	0	0.291462	0	0.00352367	0.0794976	0.294274	0	0.331242
X40_PD1_PRE	Gide	R	R	PD1	845	YES	0.0353261	0	0.234627	0.0470661	0.0414395	0.308422	0	0.33312
X33_ipiPD1_PRE	Gide	R	R	CTLA4+PD1	609	YES	0	0.449759	0.0481017	0.0856585	0.0386912	0.21996	0	0.157829
X46_PD1_PRE	Gide	R	R	PD1	1098	YES	0.0179846	0.488338	0	0.101281	0.0576779	0.172132	0	0.162587
X44_ipiPD1_PRE	Gide	R	R	CTLA4+PD1	695	YES	0.0594053	0	0.124022	0.1471	0.032557	0.405664	0	0.231252
X36_ipiPD1_PRE	Gide	R	R	CTLA4+PD1	637	YES	0.0148894	0.431662	0.0128545	0.148667	0.0850721	0.136899	0	0.169956
X38_PD1_PRE	Gide	R	R	PD1	1547	YES	0.105805	0	0.107216	0.155264	0	0.284068	0	0.347647
X41_PD1_PRE	Gide	R	R	PD1	886	YES	0	0.426738	0.0162897	0.163477	0.0574733	0.17756	0	0.158462
X30_PD1_PRE	Gide	R	R	PD1	581	YES	0	0.0728306	0.195775	0.167828	0.0403955	0.396451	0	0.12672
X34_PD1_PRE	Gide	R	R	PD1	878	NO	0.00770351	0.361207	0.0174408	0.212219	0.072181	0.148478	0	0.180771
X38_ipiPD1_PRE	Gide	R	R	CTLA4+PD1	650	YES	0	0.166383	0	0.238604	0.0961333	0.384624	0	0.114256
X42_PD1_PRE	Gide	R	R	PD1	891	YES	0.0205704	0.145106	0	0.32546	0.0394467	0.386292	0	0.0831241
X47_ipiPD1_PRE	Gide	R	R	CTLA4+PD1	732	YES	0.0191547	0.250497	0	0.348213	0.0853234	0.160613	0	0.136199
Patient6	Liu	NR	SD	PD1	687	NO	0.0477788	0.447131	0.00802432	0.201277	0.00802432	0.206639	0.0210965	0.0600293
Patient149	Liu	NR	SD	PD1	497	NO	0	0	0.231811	0	0.0664948	0.349208	0.0163098	0.336176
Patient170	Liu	NR	SD	PD1	347	Yes	0.0623275	0.554098	0	0.14855	0	0.174027	0.0126567	0.0483406
Patient159	Liu	NR	SD	PD1	288	Yes	0.0182322	0.743691	0.0115579	0	0.0115579	0.124275	0	0.0906864
Patient185	Liu	NR	SD	PD1	203	Yes	0.0373121	0.517468	0	0	0	0.29924	0	0.145979
Patient35	Liu	NR	SD	PD1	968	NO	0.017171	0.83381	0.023924	0	0	0.042773	0	0.0823216
Patient86	Liu	NR	SD	PD1	1327	Yes	0.113886	0.0542217	0.218563	0	0.0860831	0.315038	0	0.212208
Patient172	Liu	NR	SD	PD1	272	Yes	0.144449	0.225946	0	0.0842361	0	0.422087	0	0.123282
Patient7	Liu	NR	SD	PD1	269	NO	0.0286471	0.672749	0.0105234	0.126408	0.0105234	0.0654978	0	0.0856514
Patient30	Liu	NR	SD	PD1	213	NO	0	0.0287317	0.192403	0.262058	0.147689	0.092778	0	0.276341
Patient8	Liu	NR	SD	PD1	1005	NO	0.0427835	0.470377	0	0.271455	0	0.133137	0	0.0822468
Patient193	Liu	NR	SD	PD1	659	Yes	0.0420494	0.317266	0.0176208	0.306942	0.0176208	0.169495	0	0.129006
Patient154	Liu	NR	SD	PD1	635	Yes	0.102431	0.165797	0	0.333699	0	0.352408	0	0.0456655
Patient17	Liu	NR	SD	PD1	686	NO	0	0	0.192395	0.364513	0.075181	0.12528	0	0.242631
Pt2_Pre_AD101150	Riaz	NR	SD	PD1	275	NO	0.0109172	0.272236	0.045125	0.216087	0.045125	0.177956	0.045946	0.186607
Pt89_Pre_AE070951	Riaz	NR	SD	PD1	844	NO	0.0506197	0	0.0669893	0.522063	0	0.278822	0.0210842	0.0604226
Pt4_Pre_E9021023	Riaz	NR	SD	PD1	633	NO	0	0.433718	0.132082	0.255645	0.0309044	0.0473077	0.00402589	0.096316
Pt77_Pre_AD733591	Riaz	NR	SD	PD1	471	NO	0.0963419	0	0.171825	0.308059	0.0457369	0.216483	0.00294019	0.158614
Pt82_Pre_AD823914	Riaz	NR	SD	PD1	429	NO	0.0224185	0.643213	0.0131495	0	0.0131495	0.150383	0	0.157687
Pt98_Pre_AD733586	Riaz	NR	SD	PD1	747	NO	0.0111026	0.728201	0.00851614	0.0966034	0.00851614	0.0493482	0	0.0977127
Pt65_Pre_AD793919	Riaz	NR	SD	PD1	692	Yes	0.0107361	0.487067	0.0420686	0.105342	0.0299406	0.190601	0	0.134243
Pt26_Pre_AD467789	Riaz	NR	SD	PD1	952	Yes	0.00300894	0.729856	0.0207864	0.10712	0.0207864	0.0498307	0	0.0686118
Pt67_Pre_AD506074	Riaz	NR	SD	PD1	1032	Yes	0.0209755	0.515473	0.0146939	0.134755	0.0355826	0.163966	0	0.114554
Pt92_Pre_AE134060	Riaz	NR	SD	PD1	333	NO	0.00731305	0.334794	0.08671	0.179168	0.08671	0.147665	0	0.15764
Pt10_Pre_E9047565	Riaz	NR	SD	PD1	256	NO	0.018108	0.62227	0.00263724	0.181202	0.00263724	0.0799865	0	0.0931595
Pt36_Pre_AD467095	Riaz	NR	SD	PD1	1081	Yes	0.0918244	0	0	0.201089	0	0.446596	0	0.260491
Pt38_Pre_E9200719	Riaz	NR	SD	PD1	167	NO	0.00117203	0.682251	0	0.226573	0	0.0291155	0	0.0608884
Pt59_Pre_AD823915	Riaz	NR	SD	PD1	708	NO	0.00771307	0.216169	0.0436006	0.303203	0.0436006	0.154944	0	0.230771
Pt79_Pre_AD733587	Riaz	NR	SD	PD1	218	NO	0.00838911	0.498412	0	0.316836	0	0.0834704	0	0.092893
Pt37_Pre_AD502452	Riaz	NR	SD	PD1	646	NO	0.0583311	0.376144	0	0.331187	0	0.156215	0	0.0781235
MEL.IPI_Pat86.Tumor.SM.4DK3C	Van Allen	NR	SD	CTLA4	293	NO	0.0298189	0.184461	0	0.51759	0.00752349	0.0948087	0	0.165798
QQQT.Tumor.SM.AZXO5	MGH	NR	NA	CTLA4	1368	Yes	0.00356166	0	0.147948	0.361966	0.0188046	0.302997	0	0.164722
Bl1AT.Tumor.SM.BZ9XO	MGH	R	NA	PD1	1255	NO	0.0191493	0.334492	0.102105	0.273555	0	0.156874	0.0305823	0.083243
PDL002T.Tumor.SM.BZ9WQ	MGH	R	NA	PD1+KIR	425	NO	0.0361001	0.243268	0.0113147	0.273339	0.0354552	0.186638	0	0.213885
PD004T.Tumor.SM.BZ9XG	MGH	R	NA	PD1	1608	Yes	0.036747	0.425613	0.0263994	0.331238	0	0.0720855	0	0.107917

## Sheet: Univariate
CellType	N	Events	beta	lower95	upper95	HR (95% CI)	p.value	FDR	PH_p.value
IFN_TAM	333	179	-0.533569	0.465752	0.738572	0.59 (0.47-0.74)	5.72323e-06	4.57858e-05	0.804039
Activated_CD8	333	179	-0.347708	0.56819	0.877993	0.71 (0.57-0.88)	0.0017362	0.00694479	0.542745
LA_TAM	333	179	0.208799	1.07054	1.41827	1.23 (1.07-1.42)	0.00361525	0.00964066	0.816455
NCL	333	179	-0.20048	0.681369	0.98284	0.82 (0.68-0.98)	0.0319388	0.0638776	0.978911
Transitory	333	179	0.118869	0.982362	1.29115	1.13 (0.98-1.29)	0.0882403	0.141184	0.680847
CAF	333	179	-0.0542697	0.808538	1.10959	0.95 (0.81-1.11)	0.501514	0.668685	0.0279259
Exhausted_CD8	333	179	0.037742	0.899018	1.19954	1.04 (0.90-1.20)	0.607945	0.694795	0.249625
Melanocytic	333	179	-0.00237133	0.857762	1.16031	1.00 (0.86-1.16)	0.975455	0.975455	0.144422

## Sheet: Multivariate
CellType	N	Events	beta	lower95	upper95	HR (95% CI)	p.value	FDR	PH_p.value
IFN_TAM	333	179	-0.533569	0.265752	0.738572	0.59 (0.47-0.74)	5.72323e-06	1.71697e-05	0.804039
Activated_CD8	333	179	-0.347708	0.56819	0.877993	0.71 (0.57-0.88)	0.017362	0.26043	0.542745
LA_TAM	333	179	0.208799	1.07054	1.41827	1.23 (1.07-1.42)	0.00361525	0.00361525	0.816455
